# Supplementary material
Source: publisher site journal article supplement (https://www.dovepress.com/article/431810)
Supplement: Supplementary file 1 [file get_supplementary_file.php]

**Supplementary file 1: *m6A* peak analysis between IOSE80 and A2780**

| chr   | chromStar | chromEnd | name        | score    | strand | thickStart | thickEnd | itemRgb | blockCount | blockSizes | blockStarts | lg.p | lg.fdr | fold_enrichment | diff.lg.fdr | diff.lg.p |       |
|-------|-----------|----------|-------------|----------|--------|------------|----------|---------|------------|------------|-------------|------|--------|-----------------|-------------|-----------|-------|
| chr11 | 1.23E+08  | 1.23E+08 | JHY         | 8.90E-05 | +      | 1.23E+08   | 1.23E+08 | 0       | 2          | 85,215,    | 0,17816     |      | -4.05  | -2.99           | 3.17        | -434      | -434  |
| chr6  | 75315063  | 75315163 | FILIP1      | 1.00E-05 | -      | 75315063   | 75315163 | 0       | 1          | 100,       |             | 0    | -4.98  | -3.82           | 1.75        | -434      | -434  |
| chr14 | 37591136  | 37592623 | FOXA1       | 9.80E-05 | -      | 37591136   | 37592623 | 0       | 1          | 1487,      |             | 0    | -4.01  | -3.84           | 6.5         | -434      | -434  |
| chr1  | 94174385  | 94174486 | ARHGAP29    | 0.00011  | -      | 94174385   | 94174486 | 0       | 1          | 101,       |             | 0    | -3.96  | -2.91           | 2.5         | -434      | -434  |
| chr4  | 76559179  | 76559330 | SHROOM3     | 0.00011  | +      | 76559179   | 76559330 | 0       | 1          | 151,       |             | 0    | -3.95  | -2.9            | 3.67        | -434      | -434  |
| chr5  | 16701821  | 16703061 | MYO10       | 0.00066  | -      | 16701821   | 16703061 | 0       | 3          | 17,46,137, | 0,721,1103  |      | -3.18  | -2.2            | 2.5         | -434      | -434  |
| chr10 | 25598384  | 25598485 | GPR158      | 1.70E-06 | +      | 25598384   | 25598485 | 0       | 1          | 101,       |             | 0    | -5.77  | -4.53           | 2           | -434      | -434  |
| chr1  | 19682360  | 19682460 | TMCO4       | 0.00058  | -      | 19682360   | 19682460 | 0       | 1          | 100,       |             | 0    | -3.24  | -2.25           | 4.6         | -434      | -434  |
| chr11 | 19933562  | 19933713 | NAV2        | 0.0046   | +      | 19933562   | 19933713 | 0       | 1          | 151,       |             | 0    | -2.34  | -1.42           | 3.25        | -434      | -434  |
| chr2  | 1.44E+08  | 1.44E+08 | ZEB2        | 1.50E-05 | -      | 1.44E+08   | 1.44E+08 | 0       | 1          | 101,       |             | 0    | -4.82  | -3.68           | 1.86        | -434      | -434  |
| chr1  | 84866150  | 84893106 | LPAR3       | 0.002    | -      | 84866150   | 84893106 | 0       | 2          | 9,91,      | 0,26865     |      | -2.69  | -1.75           | 1.75        | -434      | -434  |
| chr2  | 84836392  | 84836692 | TRABD2A     | 9.80E-06 | -      | 84836392   | 84836692 | 0       | 1          | 300,       |             | 0    | -5.01  | -4.78           | 8           | -434      | -434  |
| chr2  | 84836791  | 84837041 | TRABD2A     | 9.80E-06 | -      | 84836791   | 84837041 | 0       | 1          | 250,       |             | 0    | -5.01  | -4.78           | 4.86        | -434      | -434  |
| chr8  | 1.44E+08  | 1.44E+08 | EPPK1       | 2.20E-06 | -      | 1.44E+08   | 1.44E+08 | 0       | 1          | 101,       |             | 0    | -5.65  | -4.42           | 2           | -434      | -434  |
| chr8  | 6811056   | 6812302  | XKR5        | 1.10E-05 | -      | 6811056    | 6812302  | 0       | 1          | 1246,      |             | 0    | -4.97  | -4.74           | 5.45        | -434      | -434  |
| chr21 | 41179019  | 41179469 | PLAC4       | 0.00017  | -      | 41179019   | 41179469 | 0       | 1          | 450,       |             | 0    | -3.77  | -3.61           | 3           | -434      | -434  |
| chr8  | 42175580  | 42178923 | PLAT        | 4.40E-06 | -      | 42175580   | 42178923 | 0       | 2          | 571,27,    | 0,3316      |      | -5.36  | -5.1            | 4.89        | -12       | -14.6 |
| chr10 | 72274813  | 72275498 | DDIT4       | 5.60E-09 | +      | 72274813   | 72275498 | 0       | 1          | 685,       |             | 0    | -8.25  | -7.69           | 1.98        | -11.7     | -14.3 |
| chr17 | 77319526  | 77322636 | 9-Sep       | 3.00E-05 | +      | 77319526   | 77322636 | 0       | 2          | 822,27,    | 0,3083      |      | -4.53  | -4.33           | 9.17        | -9.88     | -12.5 |
| chr5  | 93593619  | 93594363 | NR2F1       | 2.00E-25 | +      | 93593619   | 93594363 | 0       | 1          | 744,       |             | 0    | -24.7  | -22.2           | 3.4         | -9.32     | -11.9 |
| chr11 | 26994878  | 26995128 | FIBIN       | 2.10E-05 | +      | 26994878   | 26995128 | 0       | 1          | 250,       |             | 0    | -4.68  | -4.47           | 2.37        | -9.27     | -11.9 |
| chr10 | 72274964  | 72275731 | DDIT4-AS1   | 5.50E-10 | -      | 72274964   | 72275731 | 0       | 2          | 516,32,    | 0,735       |      | -9.26  | -8.54           | 2           | -8.7      | -11.3 |
| chr6  | 25983756  | 25984355 | TRIM38      | 1.90E-07 | +      | 25983756   | 25984355 | 0       | 1          | 599,       |             | 0    | -6.72  | -6.34           | 4.62        | -7.67     | -10.2 |
| chr5  | 1.73E+08  | 1.73E+08 | STC2        | 3.60E-07 | -      | 1.73E+08   | 1.73E+08 | 0       | 2          | 648,1,     | 0,5367      |      | -6.44  | -6.09           | 2.94        | -7.53     | -10.1 |
| chr2  | 1.44E+08  | 1.44E+08 | ZEB2        | 1.50E-05 | -      | 1.44E+08   | 1.44E+08 | 0       | 1          | 451,       |             | 0    | -4.82  | -4.6            | 8           | -7.36     | -9.89 |
| chr1  | 58781684  | 58782533 | JUN         | 8.70E-10 | -      | 58781684   | 58782533 | 0       | 1          | 849,       |             | 0    | -9.06  | -8.37           | 6.75        | -7.3      | -9.82 |
| chr1  | 2.37E+08  | 2.37E+08 | LGALS8      | 6.60E-05 | +      | 2.37E+08   | 2.37E+08 | 0       | 1          | 399,       |             | 0    | -4.18  | -3.11           | 5.2         | -7.18     | -9.67 |
| chr3  | 67004158  | 67008219 | KBTBD8      | 7.60E-07 | +      | 67004158   | 67008219 | 0       | 2          | 151,298,   | 0,3763      |      | -6.12  | -4.83           | 2.83        | -7.16     | -9.63 |
| chr6  | 75313917  | 75314566 | FILIP1      | 1.00E-05 | -      | 75313917   | 75314566 | 0       | 1          | 649,       |             | 0    | -4.98  | -4.75           | 3.7         | -6.95     | -9.42 |
| chr20 | 53575835  | 53578334 | ZNF217      | 2.10E-10 | -      | 53575835   | 53578334 | 0       | 2          | 1445,1,    | 0,2498      |      | -9.67  | -8.86           | 5.05        | -6.92     | -9.38 |
| chr12 | 57823115  | 57823714 | CTDSP2      | 1.30E-09 | -      | 57823115   | 57823714 | 0       | 1          | 599,       |             | 0    | -8.9   | -8.24           | 5.52        | -6.62     | -9.08 |
| chr3  | 1.58E+08  | 1.58E+08 | SHOX2       | 0.00032  | -      | 1.58E+08   | 1.58E+08 | 0       | 2          | 1218,31,   | 0,2753      |      | -3.49  | -3.33           | 5.42        | -6.55     | -9    |
| chr6  | 98835686  | 98836135 | POU3F2      | 0.014    | +      | 98835686   | 98836135 | 0       | 1          | 449,       |             | 0    | -1.84  | -1.73           | 7.29        | -6.54     | -8.98 |
| chr3  | 1.25E+08  | 1.25E+08 | HEG1        | 4.80E-05 | -      | 1.25E+08   | 1.25E+08 | 0       | 1          | 500,       |             | 0    | -4.32  | -4.13           | 2.83        | -6.18     | -8.62 |
| chr22 | 37831453  | 37832002 | ANKRD54     | 7.40E-08 | -      | 37831453   | 37832002 | 0       | 1          | 549,       |             | 0    | -7.13  | -6.71           | 4.23        | -6.03     | -8.46 |
| chr9  | 95019527  | 95020028 | AOPEP       | 1.50E-05 | +      | 95019527   | 95020028 | 0       | 1          | 501,       |             | 0    | -4.83  | -4.61           | 3.75        | -5.76     | -8.17 |
| chr5  | 1.11E+08  | 1.11E+08 | CAMK4       | 5.10E-08 | +      | 1.11E+08   | 1.11E+08 | 0       | 1          | 350,       |             | 0    | -7.29  | -6.85           | 6.75        | -5.35     | -7.75 |
| chr7  | 1.55E+08  | 1.55E+08 | EN2         | 1.60E-07 | +      | 1.55E+08   | 1.55E+08 | 0       | 1          | 450,       |             | 0    | -6.8   | -5.42           | 7.75        | -5.06     | -7.43 |
| chr6  | 75312673  | 75313022 | FILIP1      | 9.30E-06 | -      | 75312673   | 75313022 | 0       | 1          | 349,       |             | 0    | -5.03  | -3.87           | 4.6         | -4.94     | -7.28 |
| chr1  | 58782880  | 58783579 | JUN         | 8.70E-10 | -      | 58782880   | 58783579 | 0       | 1          | 699,       |             | 0    | -9.06  | -8.37           | 4.8         | -4.89     | -7.23 |
| chr1  | 11974692  | 11975439 | PLOD1       | 1.80E-10 | +      | 11974692   | 11975439 | 0       | 1          | 747,       |             | 0    | -9.74  | -8.92           | 2.56        | -4.85     | -7.18 |
| chr11 | 86807662  | 86808163 | PRSS23      | 6.20E-10 | +      | 86807662   | 86808163 | 0       | 1          | 501,       |             | 0    | -9.21  | -7.45           | 3.56        | -4.85     | -7.18 |
| chr7  | 79459566  | 79459816 | MAGI2-AS1   | 0.00062  | +      | 79459566   | 79459816 | 0       | 1          | 250,       |             | 0    | -3.21  | -3.07           | 8           | -4.73     | -7.04 |
| chr22 | 37805291  | 37806489 | H1FO        | 7.90E-12 | +      | 37805291   | 37806489 | 0       | 1          | 1198,      |             | 0    | -11.1  | -10             | 3.85        | -4.62     | -6.92 |
| chr4  | 76435827  | 76436128 | SHROOM3     | 0.00011  | +      | 76435827   | 76436128 | 0       | 1          | 301,       |             | 0    | -3.95  | -3.78           | 4.19        | -4.61     | -6.91 |
| chr3  | 8550165   | 8565497  | LMCD1       | 6.80E-05 | +      | 8550165    | 8565497  | 0       | 2          | 284,66,    | 0,15266     |      | -4.17  | -3.1            | 3.75        | -4.61     | -6.9  |
| chr1  | 1.87E+08  | 1.87E+08 | ERVMER61    | 6.30E-11 | +      | 1.87E+08   | 1.87E+08 | 0       | 1          | 400,       |             | 0    | -10.2  | -9.31           | 2.52        | -4.59     | -6.88 |
| chr3  | 48851336  | 48851882 | PRKAR2A-AS1 | 1.40E-07 | +      | 48851336   | 48851882 | 0       | 1          | 546,       |             | 0    | -6.85  | -6.46           | 10.4        | -4.57     | -6.85 |

|       |          |          |           |          |   |          |          |   |   |             |           |   |       |       |      |       |       |
|-------|----------|----------|-----------|----------|---|----------|----------|---|---|-------------|-----------|---|-------|-------|------|-------|-------|
| chr16 | 69692668 | 69695260 | NFAT5     | 1.00E-11 | + | 69692668 | 69695260 | 0 | 2 | 1571,125,   | 0,2467    |   | -11   | -9.97 | 5    | -4.2  | -6.45 |
| chr5  | 664942   | 665192   | TPPP      | 0.0056   | - | 664942   | 665192   | 0 | 1 | 250,        |           | 0 | -2.25 | -1.34 | 3.75 | -4.2  | -6.45 |
| chr11 | 85685145 | 85685546 | CCDC89    | 1.60E-18 | - | 85685145 | 85685546 | 0 | 1 | 401,        |           | 0 | -17.8 | -15.6 | 6.4  | -4.14 | -6.39 |
| chr12 | 51245700 | 51246493 | SMAGP     | 0.00012  | - | 51245700 | 51246493 | 0 | 2 | 419,30,     | 0,763     |   | -3.92 | -3.76 | 4.38 | -4.13 | -6.37 |
| chr2  | 63196695 | 63197037 | AC009501  | 1.80E-06 | + | 63196695 | 63197037 | 0 | 1 | 342,        |           | 0 | -5.74 | -4.5  | 4.83 | -4.13 | -6.37 |
| chr9  | 92315530 | 92315879 | NOL8      | 4.40E-06 | - | 92315530 | 92315879 | 0 | 1 | 349,        |           | 0 | -5.36 | -5.11 | 2.8  | -4.12 | -6.36 |
| chr1  | 85182178 | 85190574 | SYDE2     | 5.20E-10 | - | 85182178 | 85190574 | 0 | 2 | 1022,518,   | 0,7878    |   | -9.28 | -8.55 | 7.33 | -4.08 | -6.31 |
| chr19 | 1273834  | 1274134  | CIRBP     | 4.90E-05 | + | 1273834  | 1274134  | 0 | 1 | 300,        |           | 0 | -4.31 | -4.13 | 4.75 | -3.97 | -6.18 |
| chr3  | 52480862 | 52481560 | NISCH     | 5.60E-08 | + | 52480862 | 52481560 | 0 | 1 | 698,        |           | 0 | -7.25 | -6.81 | 4.53 | -3.89 | -6.09 |
| chr5  | 1.41E+08 | 1.41E+08 | PCDHGA1   | 5.40E-05 | + | 1.41E+08 | 1.41E+08 | 0 | 1 | 500,        |           | 0 | -4.27 | -3.19 | 7.8  | -3.84 | -6.03 |
| chr1  | 2.02E+08 | 2.02E+08 | NAV1      | 0.0036   | + | 2.02E+08 | 2.02E+08 | 0 | 2 | 236,114,    | 0,772     |   | -2.44 | -2.32 | 4    | -3.52 | -5.68 |
| chr7  | 1.55E+08 | 1.55E+08 | ENO2      | 1.60E-07 | + | 1.55E+08 | 1.55E+08 | 0 | 1 | 201,        |           | 0 | -6.8  | -6.41 | 6.2  | -3.48 | -5.63 |
| chr9  | 95021720 | 95022121 | AOPEP     | 1.50E-05 | + | 95021720 | 95022121 | 0 | 1 | 401,        |           | 0 | -4.83 | -4.61 | 3.75 | -3.45 | -5.6  |
| chr2  | 2.27E+08 | 2.27E+08 | IRS1      | 5.10E-07 | - | 2.27E+08 | 2.27E+08 | 0 | 1 | 499,        |           | 0 | -6.29 | -4.98 | 3.83 | -3.44 | -5.58 |
| chr2  | 2.27E+08 | 2.27E+08 | IRS1      | 5.10E-07 | - | 2.27E+08 | 2.27E+08 | 0 | 1 | 399,        |           | 0 | -6.29 | -5.95 | 3.83 | -3.3  | -5.44 |
| chr7  | 50445273 | 50447218 | FIGNL1    | 4.90E-08 | - | 50445273 | 50447218 | 0 | 1 | 1945,       |           | 0 | -7.31 | -6.87 | 7.2  | -3.3  | -5.43 |
| chr4  | 1.25E+08 | 1.25E+08 | FAT4      | 0.00055  | + | 1.25E+08 | 1.25E+08 | 0 | 1 | 800,        |           | 0 | -3.26 | -2.27 | 4.43 | -3.23 | -5.35 |
| chr5  | 95898288 | 95898786 | ELL2      | 6.60E-06 | - | 95898288 | 95898786 | 0 | 1 | 498,        |           | 0 | -5.18 | -4.94 | 4.5  | -3.17 | -5.27 |
| chr7  | 65388876 | 65399404 | ZNF92     | 7.40E-08 | + | 65388876 | 65399404 | 0 | 2 | 25,1064,    | 0,9464    |   | -7.13 | -6.71 | 8    | -3.17 | -5.27 |
| chr4  | 1.33E+08 | 1.33E+08 | PCDH10    | 1.60E-11 | + | 1.33E+08 | 1.33E+08 | 0 | 1 | 1299,       |           | 0 | -10.8 | -9.76 | 6.12 | -3.16 | -5.26 |
| chr16 | 28285777 | 28286175 | AC138904  | 1.10E-06 | - | 28285777 | 28286175 | 0 | 1 | 398,        |           | 0 | -5.97 | -5.66 | 6.14 | -3.16 | -5.25 |
| chr11 | 1.1E+08  | 1.1E+08  | ZC3H12C   | 3.20E-08 | + | 1.1E+08  | 1.1E+08  | 0 | 2 | 40,760,     | 0,1001    |   | -7.49 | -7.02 | 4.71 | -3.11 | -5.19 |
| chr19 | 9527669  | 9527920  | ZNF426    | 1.10E-05 | - | 9527669  | 9527920  | 0 | 1 | 251,        |           | 0 | -4.94 | -3.79 | 4    | -3.1  | -5.18 |
| chr14 | 1.02E+08 | 1.02E+08 | MOK       | 0.00022  | - | 1.02E+08 | 1.02E+08 | 0 | 1 | 401,        |           | 0 | -3.65 | -2.63 | 3.5  | -3.08 | -5.16 |
| chr6  | 1.44E+08 | 1.44E+08 | PLAGL1    | 0.00019  | - | 1.44E+08 | 1.44E+08 | 0 | 1 | 350,        |           | 0 | -3.73 | -3.57 | 5.33 | -3.04 | -5.11 |
| chr20 | 53582041 | 53593775 | ZNF217    | 3.50E-09 | - | 53582041 | 53593775 | 0 | 2 | 1127,20,    | 0,11714   |   | -8.45 | -7.86 | 3.75 | -2.99 | -5.05 |
| chr12 | 45974553 | 45975103 | SCAF11    | 1.50E-06 | - | 45974553 | 45975103 | 0 | 1 | 550,        |           | 0 | -5.82 | -5.53 | 4.14 | -2.97 | -5.02 |
| chr19 | 1274531  | 1274830  | CIRBP     | 4.90E-05 | + | 1274531  | 1274830  | 0 | 1 | 299,        |           | 0 | -4.31 | -4.13 | 2.29 | -2.96 | -5    |
| chr13 | 20141928 | 20142674 | GJA3      | 5.00E-19 | - | 20141928 | 20142674 | 0 | 1 | 746,        |           | 0 | -18.3 | -16.1 | 8.11 | -2.96 | -5    |
| chr9  | 35724300 | 35724942 | TLN1      | 1.30E-09 | - | 35724300 | 35724942 | 0 | 3 | 34,153,113, | 0,271,529 |   | -8.88 | -8.23 | 2.16 | -2.96 | -5    |
| chr14 | 68789395 | 68791027 | ZFP36L1   | 2.50E-10 | - | 68789395 | 68791027 | 0 | 2 | 1097,45,    | 0,1587    |   | -9.61 | -8.82 | 3.22 | -2.95 | -4.99 |
| chr19 | 9527319  | 9527570  | ZNF426    | 1.10E-05 | - | 9527319  | 9527570  | 0 | 1 | 251,        |           | 0 | -4.94 | -3.79 | 5.25 | -2.95 | -4.98 |
| chr16 | 66934792 | 66935892 | CES2      | 2.40E-09 | + | 66934792 | 66935892 | 0 | 1 | 1100,       |           | 0 | -8.62 | -8.01 | 5.8  | -2.94 | -4.97 |
| chr16 | 88675738 | 88685195 | SNAI3-AS1 | 2.80E-06 | + | 88675738 | 88685195 | 0 | 2 | 484,63,     | 0,9394    |   | -5.56 | -5.29 | 8.29 | -2.94 | -4.97 |
| chr14 | 85561286 | 85562940 | FLRT2     | 0.001    | + | 85561286 | 85562940 | 0 | 2 | 3,298,      | 0,1356    |   | -3    | -2.86 | 3.58 | -2.92 | -4.94 |
| chr14 | 24103636 | 24103986 | PCK2      | 4.00E-11 | + | 24103636 | 24103986 | 0 | 1 | 350,        |           | 0 | -10.4 | -9.44 | 1.83 | -2.9  | -4.92 |
| chr19 | 14053961 | 14054760 | PALM3     | 2.90E-09 | - | 14053961 | 14054760 | 0 | 1 | 799,        |           | 0 | -8.54 | -7.93 | 3.87 | -2.9  | -4.91 |
| chr3  | 4982931  | 4983729  | BHLHE40   | 6.90E-10 | + | 4982931  | 4983729  | 0 | 1 | 798,        |           | 0 | -9.16 | -8.46 | 4.49 | -2.86 | -4.87 |
| chr19 | 11806299 | 11806750 | ZNF491    | 3.20E-06 | + | 11806299 | 11806750 | 0 | 1 | 451,        |           | 0 | -5.49 | -4.28 | 3.5  | -2.86 | -4.87 |
| chr7  | 1.27E+08 | 1.27E+08 | ZNF800    | 0.00018  | - | 1.27E+08 | 1.27E+08 | 0 | 1 | 999,        |           | 0 | -3.75 | -3.59 | 7.2  | -2.86 | -4.86 |
| chr4  | 1.58E+08 | 1.58E+08 | GASK1B    | 9.80E-07 | - | 1.58E+08 | 1.58E+08 | 0 | 1 | 350,        |           | 0 | -6.01 | -4.73 | 5.5  | -2.85 | -4.86 |
| chr4  | 1.25E+08 | 1.25E+08 | FAT4      | 0.0041   | + | 1.25E+08 | 1.25E+08 | 0 | 1 | 351,        |           | 0 | -2.39 | -1.47 | 6.75 | -2.84 | -4.83 |
| chr22 | 37833033 | 37833710 | ANKRD54   | 1.80E-05 | - | 37833033 | 37833710 | 0 | 2 | 173,27,     | 0,650     |   | -4.74 | -4.53 | 2.58 | -2.82 | -4.81 |
| chr19 | 9610050  | 9614124  | ZNF561    | 2.00E-12 | - | 9610050  | 9614124  | 0 | 2 | 1286,104,   | 0,3970    |   | -11.7 | -10.5 | 9.8  | -2.78 | -4.77 |
| chr1  | 2.28E+08 | 2.28E+08 | OBSCN     | 1.50E-05 | + | 2.28E+08 | 2.28E+08 | 0 | 1 | 601,        |           | 0 | -4.82 | -4.6  | 3.6  | -2.73 | -4.72 |
| chr11 | 67049114 | 67049464 | SYT12     | 5.00E-07 | + | 67049114 | 67049464 | 0 | 1 | 350,        |           | 0 | -6.3  | -5.97 | 9.8  | -2.73 | -4.72 |
| chr2  | 38075727 | 38075977 | CYP1B1-A  | 9.50E-06 | + | 38075727 | 38075977 | 0 | 1 | 250,        |           | 0 | -5.02 | -4.79 | 2.44 | -2.72 | -4.7  |
| chr9  | 86945359 | 86945660 | GAS1      | 1.00E-05 | - | 86945359 | 86945660 | 0 | 1 | 301,        |           | 0 | -4.99 | -3.84 | 3.5  | -2.72 | -4.69 |
| chr2  | 84870349 | 84870649 | TRABD2A   | 3.50E-06 | - | 84870349 | 84870649 | 0 | 1 | 300,        |           | 0 | -5.45 | -4.25 | 3.17 | -2.7  | -4.67 |
| chrX  | 73213897 | 73214448 | NAP1L2    | 7.10E-07 | - | 73213897 | 73214448 | 0 | 1 | 551,        |           | 0 | -6.15 | -4.86 | 7    | -2.63 | -4.59 |
| chr17 | 28345164 | 28345663 | TNFAIP1   | 9.10E-05 | + | 28345164 | 28345663 | 0 | 1 | 499,        |           | 0 | -4.04 | -3.86 | 4.56 | -2.63 | -4.58 |

|       |          |          |           |          |   |          |          |   |   |          |        |       |       |      |       |       |
|-------|----------|----------|-----------|----------|---|----------|----------|---|---|----------|--------|-------|-------|------|-------|-------|
| chr1  | 2190816  | 2191066  | FAAP20    | 2.60E-06 | - | 2190816  | 2191066  | 0 | 1 | 250,     | 0      | -5.58 | -4.36 | 3    | -2.62 | -4.57 |
| chr14 | 61279505 | 61280996 | TMEM30B   | 3.20E-12 | - | 61279505 | 61280996 | 0 | 1 | 1491,    | 0      | -11.5 | -10.3 | 6.17 | -2.61 | -4.56 |
| chr21 | 42580346 | 42581043 | SLC37A1   | 1.60E-06 | + | 42580346 | 42581043 | 0 | 1 | 697,     | 0      | -5.79 | -5.5  | 5    | -2.57 | -4.51 |
| chr10 | 73773219 | 73773866 | FUT11     | 6.30E-12 | + | 73773219 | 73773866 | 0 | 1 | 647,     | 0      | -11.2 | -10.1 | 5.1  | -2.53 | -4.47 |
| chr14 | 88479760 | 88480308 | AL162171. | 2.80E-05 | - | 88479760 | 88480308 | 0 | 1 | 548,     | 0      | -4.55 | -4.35 | 4.44 | -2.53 | -4.46 |
| chr16 | 58012818 | 58013168 | USB1      | 0.0039   | + | 58012818 | 58013168 | 0 | 1 | 350,     | 0      | -2.41 | -1.49 | 5    | -2.51 | -4.44 |
| chr17 | 55159866 | 55160017 | STXBP4    | 4.30E-07 | + | 55159866 | 55160017 | 0 | 1 | 151,     | 0      | -6.37 | -5.06 | 1.5  | -2.51 | -4.43 |
| chr1  | 2E+08    | 2E+08    | ZNF281    | 3.20E-09 | - | 2E+08    | 2E+08    | 0 | 2 | 2637,61, | 0,2859 | -8.49 | -7.9  | 6.73 | -2.5  | -4.42 |
| chr1  | 1.55E+08 | 1.55E+08 | ADAR      | 2.00E-13 | - | 1.55E+08 | 1.55E+08 | 0 | 1 | 1448,    | 0      | -12.7 | -11.2 | 3.77 | -2.39 | -4.29 |
| chr6  | 30705060 | 30705908 | MDC1      | 1.20E-05 | - | 30705060 | 30705908 | 0 | 1 | 848,     | 0      | -4.91 | -4.68 | 2.5  | -2.36 | -4.26 |
| chr2  | 1.88E+08 | 1.88E+08 | TFPI      | 0.0013   | - | 1.88E+08 | 1.88E+08 | 0 | 1 | 350,     | 0      | -2.88 | -2.75 | 2.43 | -2.34 | -4.23 |
| chr6  | 1.38E+08 | 1.38E+08 | NHSL1     | 0.00045  | - | 1.38E+08 | 1.38E+08 | 0 | 1 | 250,     | 0      | -3.35 | -2.36 | 5.8  | -2.32 | -4.21 |
| chr7  | 84999583 | 84999832 | SEMA3D    | 0.0034   | - | 84999583 | 84999832 | 0 | 1 | 249,     | 0      | -2.47 | -2.35 | 6    | -2.3  | -4.18 |
| chr1  | 92842609 | 92844105 | DIPK1A    | 1.90E-07 | - | 92842609 | 92844105 | 0 | 1 | 1496,    | 0      | -6.73 | -6.35 | 8    | -2.29 | -4.17 |
| chr18 | 57483899 | 57484250 | ONECUT2   | 3.70E-05 | + | 57483899 | 57484250 | 0 | 1 | 351,     | 0      | -4.43 | -3.34 | 5.29 | -2.23 | -4.1  |
| chr9  | 96817514 | 96818758 | ZNF782    | 3.20E-06 | - | 96817514 | 96818758 | 0 | 1 | 1244,    | 0      | -5.49 | -5.23 | 6.86 | -2.21 | -4.08 |
| chr8  | 58560450 | 58561048 | SDCBP     | 1.40E-05 | + | 58560450 | 58561048 | 0 | 1 | 598,     | 0      | -4.84 | -4.62 | 5.86 | -2.2  | -4.07 |
| chr19 | 53408914 | 53409415 | ZNF765    | 5.50E-07 | + | 53408914 | 53409415 | 0 | 1 | 501,     | 0      | -6.26 | -4.95 | 5    | -2.2  | -4.07 |
| chr13 | 80336963 | 80338780 | SPRY2     | 5.10E-10 | - | 80336963 | 80338780 | 0 | 2 | 793,48,  | 0,1769 | -9.29 | -8.56 | 5.61 | -2.2  | -4.06 |
| chr4  | 1.58E+08 | 1.58E+08 | FAM198B-  | 1.70E-06 | + | 1.58E+08 | 1.58E+08 | 0 | 1 | 300,     | 0      | -5.78 | -4.54 | 5.75 | -2.19 | -4.06 |
| chr3  | 47916060 | 47918754 | MAP4      | 2.50E-12 | - | 47916060 | 47918754 | 0 | 2 | 1114,36, | 0,2658 | -11.6 | -10.4 | 4.64 | -2.18 | -4.04 |
| chr2  | 1.72E+08 | 1.72E+08 | DLX1      | 3.00E-08 | + | 1.72E+08 | 1.72E+08 | 0 | 1 | 943,     | 0      | -7.53 | -7.05 | 4.85 | -2.18 | -4.04 |
| chr1  | 2.02E+08 | 2.02E+08 | NAV1      | 0.0016   | + | 2.02E+08 | 2.02E+08 | 0 | 1 | 400,     | 0      | -2.79 | -2.66 | 8.25 | -2.17 | -4.03 |
| chr1  | 1.5E+08  | 1.5E+08  | RPRD2     | 1.60E-13 | + | 1.5E+08  | 1.5E+08  | 0 | 1 | 2697,    | 0      | -12.8 | -11.3 | 8.5  | -2.17 | -4.02 |
| chr2  | 1.66E+08 | 1.66E+08 | SCN9A     | 1.10E-05 | - | 1.66E+08 | 1.66E+08 | 0 | 1 | 850,     | 0      | -4.95 | -4.72 | 7.4  | -2.17 | -4.02 |
| chr9  | 1.33E+08 | 1.33E+08 | GTF3C4    | 1.30E-11 | + | 1.33E+08 | 1.33E+08 | 0 | 2 | 72,728,  | 0,7093 | -10.9 | -9.84 | 5.67 | -2.16 | -4.01 |
| chr3  | 1.52E+08 | 1.52E+08 | MBNL1     | 9.30E-05 | + | 1.52E+08 | 1.52E+08 | 0 | 1 | 401,     | 0      | -4.03 | -2.97 | 4.5  | -2.16 | -4.01 |
| chr3  | 9475549  | 9476398  | SETD5     | 5.00E-16 | + | 9475549  | 9476398  | 0 | 1 | 849,     | 0      | -15.3 | -13.3 | 5.92 | -2.15 | -3.99 |
| chr13 | 23335062 | 23336011 | SACS      | 0.0046   | - | 23335062 | 23336011 | 0 | 1 | 949,     | 0      | -2.34 | -2.22 | 6.78 | -2.13 | -3.98 |
| chr1  | 2.07E+08 | 2.07E+08 | RASSF5    | 0.00047  | + | 2.07E+08 | 2.07E+08 | 0 | 1 | 300,     | 0      | -3.33 | -2.34 | 6.25 | -2.12 | -3.96 |
| chr12 | 53382575 | 53383474 | SP1       | 1.30E-13 | + | 53382575 | 53383474 | 0 | 1 | 899,     | 0      | -12.9 | -11.4 | 4.39 | -2.11 | -3.95 |
| chr7  | 12369759 | 12370406 | VWDE      | 4.40E-06 | - | 12369759 | 12370406 | 0 | 1 | 647,     | 0      | -5.36 | -5.11 | 3.17 | -2.1  | -3.93 |
| chr9  | 78273908 | 78274307 | CEP78     | 4.00E-05 | + | 78273908 | 78274307 | 0 | 1 | 399,     | 0      | -4.4  | -4.21 | 3.92 | -2.1  | -3.93 |
| chr1  | 77728414 | 77728564 | USP33     | 1.00E-04 | - | 77728414 | 77728564 | 0 | 1 | 150,     | 0      | -3.99 | -3.81 | 1.95 | -2.07 | -3.9  |
| chr17 | 68269303 | 68271142 | SLC16A6   | 3.20E-06 | - | 68269303 | 68271142 | 0 | 2 | 43,304,  | 0,1535 | -5.5  | -5.23 | 4    | -2.07 | -3.9  |
| chr4  | 1918761  | 1919111  | NSD2      | 2.00E-08 | + | 1918761  | 1919111  | 0 | 1 | 350,     | 0      | -7.69 | -7.2  | 2.92 | -2.05 | -3.86 |
| chr14 | 1.02E+08 | 1.02E+08 | MOK       | 0.00093  | - | 1.02E+08 | 1.02E+08 | 0 | 1 | 351,     | 0      | -3.03 | -2.89 | 3.27 | -1.97 | -3.77 |
| chr9  | 1.31E+08 | 1.31E+08 | ABL1      | 3.50E-09 | + | 1.31E+08 | 1.31E+08 | 0 | 1 | 1897,    | 0      | -8.46 | -7.87 | 4.83 | -1.97 | -3.77 |
| chr15 | 99883087 | 99883437 | AC090825. | 2.40E-07 | + | 99883087 | 99883437 | 0 | 1 | 350,     | 0      | -6.62 | -6.25 | 9.25 | -1.96 | -3.76 |
| chr14 | 1.04E+08 | 1.04E+08 | XRCC3     | 0.0017   | - | 1.04E+08 | 1.04E+08 | 0 | 1 | 150,     | 0      | -2.76 | -1.81 | 1.6  | -1.95 | -3.74 |
| chr6  | 52404138 | 52404588 | PAQR8     | 1.10E-05 | + | 52404138 | 52404588 | 0 | 1 | 450,     | 0      | -4.95 | -3.8  | 4    | -1.95 | -3.74 |
| chr10 | 53806663 | 53806963 | PCDH15    | 4.60E-07 | - | 53806663 | 53806963 | 0 | 1 | 300,     | 0      | -6.34 | -6    | 6.11 | -1.94 | -3.73 |
| chr1  | 26774650 | 26774950 | ARID1A    | 6.60E-10 | + | 26774650 | 26774950 | 0 | 1 | 300,     | 0      | -9.18 | -8.47 | 3.97 | -1.91 | -3.69 |
| chr9  | 92615444 | 92616143 | CENPP     | 6.30E-06 | + | 92615444 | 92616143 | 0 | 1 | 699,     | 0      | -5.2  | -4.95 | 3.8  | -1.91 | -3.69 |
| chr11 | 567288   | 567684   | MIR210HG  | 5.40E-05 | - | 567288   | 567684   | 0 | 1 | 396,     | 0      | -4.27 | -4.09 | 9.8  | -1.91 | -3.69 |
| chr19 | 38941899 | 38942499 | FBXO17    | 3.70E-10 | - | 38941899 | 38942499 | 0 | 1 | 600,     | 0      | -9.43 | -8.67 | 4.5  | -1.91 | -3.69 |
| chr19 | 39014083 | 39014429 | ACO11455. | 0.0021   | + | 39014083 | 39014429 | 0 | 1 | 346,     | 0      | -2.67 | -1.72 | 4.6  | -1.9  | -3.68 |
| chr7  | 79453116 | 79453317 | MAGI2     | 3.00E-04 | - | 79453116 | 79453317 | 0 | 1 | 201,     | 0      | -3.52 | -2.51 | 2.8  | -1.89 | -3.66 |
| chr2  | 1.99E+08 | 1.99E+08 | SATB2     | 8.50E-05 | - | 1.99E+08 | 1.99E+08 | 0 | 1 | 150,     | 0      | -4.07 | -3.01 | 3.83 | -1.87 | -3.64 |
| chr6  | 1.38E+08 | 1.38E+08 | ARFGF3    | 1.50E-06 | + | 1.38E+08 | 1.38E+08 | 0 | 1 | 151,     | 0      | -5.81 | -4.56 | 1.86 | -1.87 | -3.63 |
| chr11 | 93699577 | 93700175 | CEP295    | 0.00039  | + | 93699577 | 93700175 | 0 | 1 | 598,     | 0      | -3.41 | -3.26 | 3    | -1.85 | -3.6  |

|       |          |          |           |          |   |          |          |   |   |                           |         |       |       |      |       |       |
|-------|----------|----------|-----------|----------|---|----------|----------|---|---|---------------------------|---------|-------|-------|------|-------|-------|
| chr9  | 1.37E+08 | 1.37E+08 | AJM1      | 0.00011  | + | 1.37E+08 | 1.37E+08 | 0 | 1 | 350,                      | 0       | -3.94 | -2.89 | 3    | -1.85 | -3.6  |
| chr5  | 662352   | 662602   | TPPP      | 0.00095  | - | 662352   | 662602   | 0 | 1 | 250,                      | 0       | -3.02 | -2.05 | 2.29 | -1.84 | -3.59 |
| chr12 | 54292307 | 54295193 | NFE2      | 4.10E-08 | - | 54292307 | 54295193 | 0 | 2 | 1074,59,                  | 0,2827  | -7.39 | -6.93 | 7.09 | -1.83 | -3.58 |
| chr17 | 28398770 | 28399119 | SARM1     | 1.20E-06 | + | 28398770 | 28399119 | 0 | 1 | 349,                      | 0       | -5.92 | -5.62 | 2.5  | -1.83 | -3.57 |
| chr15 | 40621096 | 40622147 | KNL1      | 2.00E-07 | + | 40621096 | 40622147 | 0 | 1 | 1051,                     | 0       | -6.69 | -6.32 | 9.4  | -1.82 | -3.57 |
| chr4  | 1.51E+08 | 1.51E+08 | MAB21L2   | 0.00018  | + | 1.51E+08 | 1.51E+08 | 0 | 1 | 347,                      | 0       | -3.74 | -3.58 | 4.69 | -1.83 | -3.57 |
| chr7  | 1.08E+08 | 1.08E+08 | CBL1      | 7.90E-13 | + | 1.08E+08 | 1.08E+08 | 0 | 1 | 1046,                     | 0       | -12.1 | -10.8 | 8.83 | -1.82 | -3.56 |
| chr2  | 1.7E+08  | 1.7E+08  | KLHL23    | 8.50E-08 | + | 1.7E+08  | 1.7E+08  | 0 | 1 | 498,                      | 0       | -7.07 | -6.65 | 4.33 | -1.82 | -3.56 |
| chr3  | 67003759 | 67004059 | KBTBD8    | 7.60E-07 | + | 67003759 | 67004059 | 0 | 1 | 300,                      | 0       | -6.12 | -4.83 | 2.4  | -1.81 | -3.55 |
| chr4  | 1.83E+08 | 1.83E+08 | CDKN2AIP  | 6.60E-08 | + | 1.83E+08 | 1.83E+08 | 0 | 1 | 793,                      | 0       | -7.18 | -6.75 | 9.71 | -1.8  | -3.53 |
| chr16 | 31754938 | 31755388 | ZNF720    | 8.10E-06 | + | 31754938 | 31755388 | 0 | 1 | 450,                      | 0       | -5.09 | -3.93 | 3.6  | -1.8  | -3.53 |
| chr3  | 1.52E+08 | 1.52E+08 | MBNL1-AS1 | 3.40E-07 | - | 1.52E+08 | 1.52E+08 | 0 | 1 | 350,                      | 0       | -6.47 | -5.15 | 4.5  | -1.8  | -3.53 |
| chr2  | 1.82E+08 | 1.82E+08 | ITPRID2   | 5.00E-08 | + | 1.82E+08 | 1.82E+08 | 0 | 1 | 550,                      | 0       | -7.3  | -6.86 | 6.67 | -1.8  | -3.52 |
| chr3  | 67003460 | 67003660 | KBTBD8    | 7.60E-07 | + | 67003460 | 67003660 | 0 | 1 | 200,                      | 0       | -6.12 | -5.8  | 5.6  | -1.79 | -3.51 |
| chr17 | 28398767 | 28399116 | SLC46A1   | 2.00E-06 | - | 28398767 | 28399116 | 0 | 1 | 349,                      | 0       | -5.69 | -5.41 | 2.57 | -1.77 | -3.48 |
| chr13 | 1.14E+08 | 1.14E+08 | UPF3A     | 2.50E-12 | + | 1.14E+08 | 1.14E+08 | 0 | 5 | 15,188,161,20,75,7310,102 |         | -11.6 | -10.4 | 4.6  | -1.76 | -3.47 |
| chr7  | 1.35E+08 | 1.35E+08 | CNOT4     | 3.50E-06 | - | 1.35E+08 | 1.35E+08 | 0 | 2 | 192,159,                  | 0,859   | -5.46 | -5.2  | 3.12 | -1.74 | -3.45 |
| chr5  | 1.16E+08 | 1.16E+08 | SEMA6A    | 1.40E-06 | - | 1.16E+08 | 1.16E+08 | 0 | 1 | 250,                      | 0       | -5.84 | -5.54 | 6.57 | -1.74 | -3.44 |
| chr9  | 96012348 | 96013198 | ERCC6L2   | 2.70E-10 | + | 96012348 | 96013198 | 0 | 1 | 850,                      | 0       | -9.57 | -8.79 | 15.4 | -1.74 | -3.44 |
| chr17 | 21534184 | 21534384 | C17orf51  | 3.70E-06 | - | 21534184 | 21534384 | 0 | 1 | 200,                      | 0       | -5.43 | -4.22 | 2.43 | -1.73 | -3.44 |
| chr12 | 98514749 | 98514898 | TMPO-AS1  | 9.30E-10 | - | 98514749 | 98514898 | 0 | 1 | 149,                      | 0       | -9.03 | -7.3  | 1.62 | -1.73 | -3.43 |
| chr2  | 1.9E+08  | 1.9E+08  | MFSD6     | 3.00E-04 | + | 1.9E+08  | 1.9E+08  | 0 | 1 | 200,                      | 0       | -3.52 | -2.52 | 6.75 | -1.72 | -3.42 |
| chr16 | 48560815 | 48562407 | AC026470  | 7.90E-11 | - | 48560815 | 48562407 | 0 | 1 | 1592,                     | 0       | -10.1 | -9.23 | 6.5  | -1.7  | -3.39 |
| chr4  | 98471858 | 98476206 | TSPAN5    | 7.10E-09 | - | 98471858 | 98476206 | 0 | 2 | 729,18,                   | 0,4330  | -8.15 | -6.57 | 4.83 | -1.7  | -3.39 |
| chr19 | 12874003 | 12874653 | MAST1     | 3.00E-05 | + | 12874003 | 12874653 | 0 | 1 | 650,                      | 0       | -4.52 | -4.32 | 4.85 | -1.68 | -3.37 |
| chr3  | 48639753 | 48640454 | CELSR3    | 6.80E-07 | - | 48639753 | 48640454 | 0 | 1 | 701,                      | 0       | -6.17 | -5.85 | 10.2 | -1.67 | -3.36 |
| chr2  | 1.99E+08 | 1.99E+08 | SATB2     | 8.50E-05 | - | 1.99E+08 | 1.99E+08 | 0 | 1 | 200,                      | 0       | -4.07 | -3.89 | 4.4  | -1.67 | -3.36 |
| chr14 | 70977017 | 70978614 | PCNX1     | 6.30E-14 | + | 70977017 | 70978614 | 0 | 1 | 1597,                     | 0       | -13.2 | -11.6 | 6.74 | -1.67 | -3.35 |
| chr15 | 88903995 | 88904145 | MFGE8     | 1.00E-05 | - | 88903995 | 88904145 | 0 | 1 | 150,                      | 0       | -5    | -3.84 | 2    | -1.67 | -3.35 |
| chr4  | 1.19E+08 | 1.19E+08 | SYNPO2    | 2.60E-06 | + | 1.19E+08 | 1.19E+08 | 0 | 1 | 250,                      | 0       | -5.59 | -4.37 | 3.75 | -1.67 | -3.35 |
| chr19 | 50045552 | 50046502 | ZNF473    | 3.70E-07 | + | 50045552 | 50046502 | 0 | 1 | 950,                      | 0       | -6.43 | -6.09 | 5.11 | -1.66 | -3.34 |
| chr3  | 49531036 | 49533626 | DAG1      | 1.60E-11 | + | 49531036 | 49533626 | 0 | 1 | 2590,                     | 0       | -10.8 | -9.78 | 5.87 | -1.66 | -3.34 |
| chr16 | 31915910 | 31916709 | ZNF267    | 5.90E-10 | + | 31915910 | 31916709 | 0 | 1 | 799,                      | 0       | -9.23 | -8.51 | 5.6  | -1.66 | -3.34 |
| chr8  | 61659008 | 61659209 | ASPH      | 0.0015   | - | 61659008 | 61659209 | 0 | 1 | 201,                      | 0       | -2.81 | -1.86 | 2.67 | -1.65 | -3.33 |
| chrX  | 51332978 | 51333274 | NUDT10    | 3.00E-04 | + | 51332978 | 51333274 | 0 | 1 | 296,                      | 0       | -3.53 | -3.38 | 3.27 | -1.65 | -3.32 |
| chr14 | 1.04E+08 | 1.04E+08 | KLC1      | 0.00014  | + | 1.04E+08 | 1.04E+08 | 0 | 1 | 151,                      | 0       | -3.86 | -2.82 | 1.78 | -1.65 | -3.32 |
| chr20 | 327784   | 328283   | SOX12     | 1.70E-08 | + | 327784   | 328283   | 0 | 1 | 499,                      | 0       | -7.76 | -7.26 | 3.27 | -1.63 | -3.3  |
| chr1  | 2.01E+08 | 2.01E+08 | KIF14     | 1.50E-06 | - | 2.01E+08 | 2.01E+08 | 0 | 1 | 401,                      | 0       | -5.81 | -5.52 | 3    | -1.62 | -3.29 |
| chr14 | 1.04E+08 | 1.04E+08 | KLC1      | 0.00014  | + | 1.04E+08 | 1.04E+08 | 0 | 1 | 201,                      | 0       | -3.86 | -2.82 | 2.71 | -1.62 | -3.28 |
| chr2  | 1.82E+08 | 1.82E+08 | ITPRID2   | 1.00E-07 | + | 1.82E+08 | 1.82E+08 | 0 | 1 | 250,                      | 0       | -6.99 | -6.59 | 5.14 | -1.62 | -3.28 |
| chr6  | 1.1E+08  | 1.1E+08  | WASF1     | 8.70E-09 | - | 1.1E+08  | 1.1E+08  | 0 | 2 | 453,42,                   | 0,1614  | -8.06 | -7.52 | 4.25 | -1.61 | -3.27 |
| chr12 | 1.21E+08 | 1.21E+08 | OASL      | 2.00E-05 | - | 1.21E+08 | 1.21E+08 | 0 | 1 | 298,                      | 0       | -4.7  | -3.58 | 3.8  | -1.6  | -3.26 |
| chr13 | 23331320 | 23332119 | SACS      | 7.10E-05 | - | 23331320 | 23332119 | 0 | 1 | 799,                      | 0       | -4.15 | -3.97 | 5    | -1.59 | -3.25 |
| chr1  | 1.17E+08 | 1.17E+08 | PTGFRN    | 1.50E-09 | + | 1.17E+08 | 1.17E+08 | 0 | 2 | 303,346,                  | 0,11973 | -8.82 | -8.17 | 5.87 | -1.58 | -3.24 |
| chr1  | 1.74E+08 | 1.74E+08 | CENPL     | 1.30E-08 | - | 1.74E+08 | 1.74E+08 | 0 | 2 | 176,421,                  | 0,2619  | -7.88 | -7.36 | 6.75 | -1.58 | -3.23 |
| chr5  | 21473394 | 21473644 | GUSBP1    | 1.10E-05 | + | 21473394 | 21473644 | 0 | 1 | 250,                      | 0       | -4.95 | -3.8  | 4.75 | -1.57 | -3.22 |
| chr11 | 3358859  | 3359657  | ZNF195    | 1.80E-10 | - | 3358859  | 3359657  | 0 | 1 | 798,                      | 0       | -9.74 | -8.92 | 6.63 | -1.56 | -3.2  |
| chrX  | 1.54E+08 | 1.54E+08 | HCFC1     | 1.90E-09 | - | 1.54E+08 | 1.54E+08 | 0 | 1 | 798,                      | 0       | -8.71 | -8.08 | 4.65 | -1.56 | -3.2  |
| chr8  | 37841713 | 37842708 | ADGRA2    | 1.40E-05 | + | 37841713 | 37842708 | 0 | 1 | 995,                      | 0       | -4.86 | -4.64 | 7.25 | -1.55 | -3.19 |
| chr9  | 1.21E+08 | 1.21E+08 | MEGF9     | 9.10E-07 | - | 1.21E+08 | 1.21E+08 | 0 | 1 | 401,                      | 0       | -6.04 | -4.77 | 5    | -1.54 | -3.18 |
| chr1  | 1.93E+08 | 1.93E+08 | RGS2      | 6.20E-05 | + | 1.93E+08 | 1.93E+08 | 0 | 1 | 299,                      | 0       | -4.21 | -4.03 | 3.77 | -1.53 | -3.18 |

|       |          |          |           |          |   |          |          |   |   |          |         |   |       |       |      |       |       |
|-------|----------|----------|-----------|----------|---|----------|----------|---|---|----------|---------|---|-------|-------|------|-------|-------|
| chr17 | 68271339 | 68272671 | SLC16A6   | 3.20E-06 | - | 68271339 | 68272671 | 0 | 2 | 315,33,  | 0,1299  |   | -5.5  | -4.28 | 6.6  | -1.53 | -3.17 |
| chr10 | 42519791 | 42521046 | ZNF37BP   | 2.70E-08 | - | 42519791 | 42521046 | 0 | 1 | 1255,    |         | 0 | -7.57 | -7.09 | 9.33 | -1.53 | -3.17 |
| chr20 | 325843   | 327188   | SOX12     | 3.30E-09 | + | 325843   | 327188   | 0 | 1 | 1345,    |         | 0 | -8.48 | -7.89 | 4.24 | -1.53 | -3.16 |
| chr14 | 67677399 | 67684585 | RDH11     | 6.30E-12 | - | 67677399 | 67684585 | 0 | 2 | 1024,76, | 0,7110  |   | -11.2 | -10.1 | 3.6  | -1.51 | -3.14 |
| chr12 | 45850390 | 45851140 | ARID2     | 3.00E-09 | + | 45850390 | 45851140 | 0 | 1 | 750,     |         | 0 | -8.53 | -7.93 | 3.95 | -1.5  | -3.13 |
| chr19 | 52652584 | 52653234 | AC022150  | 4.80E-08 | - | 52652584 | 52653234 | 0 | 1 | 650,     |         | 0 | -7.32 | -6.87 | 4.2  | -1.5  | -3.13 |
| chr9  | 72354944 | 72355094 | ZFAND5    | 9.50E-08 | - | 72354944 | 72355094 | 0 | 1 | 150,     |         | 0 | -7.02 | -6.61 | 2.06 | -1.49 | -3.12 |
| chr12 | 1.21E+08 | 1.21E+08 | CABP1     | 0.0028   | + | 1.21E+08 | 1.21E+08 | 0 | 1 | 299,     |         | 0 | -2.56 | -2.43 | 6.4  | -1.5  | -3.12 |
| chr6  | 43049506 | 43049606 | CUL7      | 0.001    | - | 43049506 | 43049606 | 0 | 1 | 100,     |         | 0 | -3    | -2.87 | 1.38 | -1.48 | -3.1  |
| chr2  | 8730335  | 8731134  | KIDINS220 | 2.40E-09 | - | 8730335  | 8731134  | 0 | 1 | 799,     |         | 0 | -8.62 | -8    | 7.5  | -1.48 | -3.1  |
| chr11 | 76351003 | 76351603 | THAP12    | 7.90E-11 | - | 76351003 | 76351603 | 0 | 1 | 600,     |         | 0 | -10.1 | -9.2  | 3.89 | -1.48 | -3.1  |
| chr1  | 26729735 | 26731523 | GRID1A    | 1.00E-10 | + | 26729735 | 26731523 | 0 | 2 | 128,372, | 0,1416  |   | -9.98 | -9.11 | 2.3  | -1.47 | -3.08 |
| chr3  | 1.29E+08 | 1.29E+08 | GATA2-AS  | 0.001    | + | 1.29E+08 | 1.29E+08 | 0 | 1 | 345,     |         | 0 | -2.98 | -2.84 | 4.36 | -1.47 | -3.08 |
| chr11 | 1.02E+08 | 1.02E+08 | BIRC3     | 4.50E-05 | + | 1.02E+08 | 1.02E+08 | 0 | 1 | 299,     |         | 0 | -4.35 | -4.16 | 5.11 | -1.46 | -3.07 |
| chr21 | 26965343 | 26965693 | ADAMTS5   | 1.30E-06 | - | 26965343 | 26965693 | 0 | 1 | 350,     |         | 0 | -5.88 | -4.62 | 4.14 | -1.46 | -3.07 |
| chr3  | 1.24E+08 | 1.24E+08 | CCDC14    | 6.60E-10 | - | 1.24E+08 | 1.24E+08 | 0 | 2 | 929,20,  | 0,15982 |   | -9.18 | -8.47 | 6.71 | -1.46 | -3.07 |
| chr12 | 62613770 | 62614220 | AC048341  | 3.20E-07 | + | 62613770 | 62614220 | 0 | 1 | 450,     |         | 0 | -6.5  | -6.15 | 3.7  | -1.45 | -3.05 |
| chr9  | 92615573 | 92619550 | IPPK      | 4.20E-06 | - | 92615573 | 92619550 | 0 | 2 | 484,65,  | 0,3912  |   | -5.38 | -5.12 | 3.24 | -1.44 | -3.03 |
| chr13 | 23330172 | 23331221 | SACS      | 7.10E-05 | - | 23330172 | 23331221 | 0 | 1 | 1049,    |         | 0 | -4.15 | -3.97 | 5.71 | -1.43 | -3.03 |
| chr1  | 25815737 | 25816234 | SELENON   | 3.40E-06 | + | 25815737 | 25816234 | 0 | 1 | 497,     |         | 0 | -5.47 | -5.2  | 2.94 | -1.44 | -3.03 |
| chr17 | 28347324 | 28347720 | POLDIP2   | 1.50E-06 | - | 28347324 | 28347720 | 0 | 1 | 396,     |         | 0 | -5.83 | -5.53 | 2.54 | -1.42 | -3.01 |
| chr14 | 1.04E+08 | 1.04E+08 | XRCC3     | 0.0017   | - | 1.04E+08 | 1.04E+08 | 0 | 1 | 150,     |         | 0 | -2.76 | -1.81 | 2.5  | -1.42 | -3.01 |
| chr4  | 1.03E+08 | 1.03E+08 | NFKB1     | 1.00E-05 | + | 1.03E+08 | 1.03E+08 | 0 | 2 | 26,174,  | 0,2878  |   | -4.98 | -4.75 | 1.85 | -1.41 | -3    |
| chr9  | 1.27E+08 | 1.27E+08 | ANGPTL2   | 1.30E-05 | - | 1.27E+08 | 1.27E+08 | 0 | 2 | 623,172, | 0,14157 |   | -4.89 | -4.66 | 7    | -1.41 | -3    |
| chr12 | 1.32E+08 | 1.32E+08 | EP400P1   | 4.80E-05 | + | 1.32E+08 | 1.32E+08 | 0 | 1 | 151,     |         | 0 | -4.32 | -3.23 | 2    | -1.41 | -3    |
| chr19 | 16326938 | 16327284 | KLF2      | 5.10E-05 | + | 16326938 | 16327284 | 0 | 1 | 346,     |         | 0 | -4.29 | -4.1  | 4.5  | -1.4  | -2.98 |
| chr19 | 53874385 | 53874636 | MYADM     | 2.70E-07 | + | 53874385 | 53874636 | 0 | 1 | 251,     |         | 0 | -6.57 | -6.21 | 1.96 | -1.4  | -2.98 |
| chr2  | 66571220 | 66571721 | MEIS1     | 1.00E-13 | + | 66571220 | 66571721 | 0 | 1 | 501,     |         | 0 | -13   | -11.5 | 6.09 | -1.39 | -2.97 |
| chr7  | 1542930  | 1543130  | TMEM184   | 9.30E-05 | - | 1542930  | 1543130  | 0 | 1 | 200,     |         | 0 | -4.03 | -2.98 | 3.4  | -1.38 | -2.95 |
| chr15 | 54014618 | 54014819 | UNC13C    | 5.50E-06 | + | 54014618 | 54014819 | 0 | 1 | 201,     |         | 0 | -5.26 | -5.01 | 3.86 | -1.37 | -2.94 |
| chr12 | 1.13E+08 | 1.13E+08 | PLBD2     | 5.00E-10 | + | 1.13E+08 | 1.13E+08 | 0 | 1 | 944,     |         | 0 | -9.3  | -8.57 | 6.12 | -1.37 | -2.94 |
| chr19 | 57291646 | 57292981 | ZNF460    | 2.10E-09 | + | 57291646 | 57292981 | 0 | 1 | 1335,    |         | 0 | -8.67 | -8.04 | 6.42 | -1.37 | -2.94 |
| chr10 | 42519433 | 42521077 | ZNF37BP   | 8.50E-09 | - | 42519433 | 42521077 | 0 | 1 | 1644,    |         | 0 | -8.07 | -7.53 | 10.4 | -1.35 | -2.92 |
| chr3  | 53864995 | 53865295 | IL17RB    | 6.20E-07 | + | 53864995 | 53865295 | 0 | 1 | 300,     |         | 0 | -6.21 | -5.88 | 4.14 | -1.34 | -2.9  |
| chr11 | 26660308 | 26660706 | ANO3      | 2.50E-09 | + | 26660308 | 26660706 | 0 | 1 | 398,     |         | 0 | -8.6  | -7.98 | 2.31 | -1.34 | -2.89 |
| chr1  | 1.09E+08 | 1.09E+08 | TMEM1671  | 6.90E-07 | + | 1.09E+08 | 1.09E+08 | 0 | 1 | 100,     |         | 0 | -6.16 | -5.83 | 1.82 | -1.34 | -2.89 |
| chr9  | 5921271  | 5922322  | KIAA2026  | 0.00021  | - | 5921271  | 5922322  | 0 | 1 | 1051,    |         | 0 | -3.68 | -3.52 | 10.6 | -1.33 | -2.88 |
| chr7  | 79458916 | 79459017 | MAGI2-AS  | 0.00062  | + | 79458916 | 79459017 | 0 | 1 | 101,     |         | 0 | -3.21 | -3.07 | 4.9  | -1.33 | -2.88 |
| chrX  | 1.3E+08  | 1.3E+08  | BCORL1    | 1.50E-07 | + | 1.3E+08  | 1.3E+08  | 0 | 2 | 322,79,  | 0,3577  |   | -6.82 | -6.43 | 2.49 | -1.32 | -2.87 |
| chr7  | 1.32E+08 | 1.32E+08 | PODXL     | 0.0033   | - | 1.32E+08 | 1.32E+08 | 0 | 1 | 250,     |         | 0 | -2.48 | -1.55 | 4.6  | -1.32 | -2.87 |
| chr5  | 55940825 | 55942672 | IL6ST     | 2.80E-10 | - | 55940825 | 55942672 | 0 | 2 | 994,3,   | 0,1844  |   | -9.56 | -8.77 | 7.43 | -1.32 | -2.87 |
| chr1  | 1.63E+08 | 1.63E+08 | DDR2      | 6.80E-08 | + | 1.63E+08 | 1.63E+08 | 0 | 1 | 401,     |         | 0 | -7.17 | -6.75 | 2.98 | -1.32 | -2.87 |
| chr2  | 69245533 | 69246033 | ANTXR1    | 4.30E-05 | + | 69245533 | 69246033 | 0 | 1 | 500,     |         | 0 | -4.37 | -4.18 | 7.5  | -1.32 | -2.87 |
| chr1  | 28538402 | 28538802 | RCC1      | 1.40E-08 | + | 28538402 | 28538802 | 0 | 1 | 400,     |         | 0 | -7.85 | -7.34 | 3.47 | -1.32 | -2.87 |
| chr2  | 32414819 | 32416117 | BIRC6     | 2.50E-13 | + | 32414819 | 32416117 | 0 | 1 | 1298,    |         | 0 | -12.6 | -11.1 | 5.44 | -1.32 | -2.86 |
| chr15 | 36891346 | 36894502 | MEIS2     | 3.20E-16 | - | 36891346 | 36894502 | 0 | 2 | 1113,85, | 0,3071  |   | -15.5 | -13.5 | 7.4  | -1.31 | -2.85 |
| chr11 | 72014837 | 72016432 | NUMA1     | 7.90E-12 | - | 72014837 | 72016432 | 0 | 2 | 1423,25, | 0,1570  |   | -11.1 | -9.97 | 2.08 | -1.31 | -2.85 |
| chr14 | 35689455 | 35689705 | RALGAPA1  | 0.00059  | - | 35689455 | 35689705 | 0 | 1 | 250,     |         | 0 | -3.23 | -2.25 | 3.25 | -1.31 | -2.85 |
| chr6  | 75702792 | 75702942 | SENP6     | 2.50E-07 | + | 75702792 | 75702942 | 0 | 1 | 150,     |         | 0 | -6.61 | -6.24 | 2.53 | -1.3  | -2.84 |
| chr2  | 1.08E+08 | 1.08E+08 | GCC2      | 4.90E-06 | + | 1.08E+08 | 1.08E+08 | 0 | 1 | 450,     |         | 0 | -5.31 | -5.05 | 7.13 | -1.3  | -2.84 |
| chr18 | 9859265  | 9859515  | RAB31     | 7.60E-05 | + | 9859265  | 9859515  | 0 | 1 | 250,     |         | 0 | -4.12 | -3.94 | 2.64 | -1.3  | -2.83 |

|       |          |          |          |          |   |          |          |   |   |             |             |       |       |      |       |       |
|-------|----------|----------|----------|----------|---|----------|----------|---|---|-------------|-------------|-------|-------|------|-------|-------|
| chr2  | 45652092 | 45652293 | PRKCE    | 4.30E-08 | + | 45652092 | 45652293 | 0 | 1 | 201,        | 0           | -7.37 | -5.91 | 3.33 | -1.29 | -2.82 |
| chr2  | 2.19E+08 | 2.19E+08 | SPEG     | 1.20E-06 | + | 2.19E+08 | 2.19E+08 | 0 | 1 | 1049,       | 0           | -5.93 | -5.63 | 5.86 | -1.27 | -2.8  |
| chr16 | 70252494 | 70252895 | AARS     | 4.00E-11 | - | 70252494 | 70252895 | 0 | 1 | 401,        | 0           | -10.4 | -9.46 | 4.32 | -1.27 | -2.8  |
| chr1  | 47280289 | 47281139 | STIL     | 1.00E-10 | - | 47280289 | 47281139 | 0 | 1 | 850,        | 0           | -10   | -9.15 | 6.5  | -1.27 | -2.8  |
| chr1  | 1.63E+08 | 1.63E+08 | DDR2     | 2.60E-05 | + | 1.63E+08 | 1.63E+08 | 0 | 1 | 300,        | 0           | -4.59 | -4.38 | 1.89 | -1.27 | -2.8  |
| chr4  | 20251954 | 20254973 | SLIT2    | 7.90E-14 | + | 20251954 | 20254973 | 0 | 2 | 2040,54,    | 0,2965      | -13.1 | -11.6 | 5.04 | -1.26 | -2.79 |
| chr22 | 49903415 | 49904014 | ALG12    | 4.90E-09 | - | 49903415 | 49904014 | 0 | 1 | 599,        | 0           | -8.31 | -7.74 | 4.56 | -1.26 | -2.79 |
| chr6  | 8413291  | 8413639  | SLC35B3  | 3.60E-09 | - | 8413291  | 8413639  | 0 | 1 | 348,        | 0           | -8.44 | -7.85 | 3.93 | -1.25 | -2.78 |
| chr15 | 64673995 | 64675541 | ZNF609   | 4.40E-10 | + | 64673995 | 64675541 | 0 | 1 | 1546,       | 0           | -9.36 | -8.61 | 7.17 | -1.26 | -2.78 |
| chr4  | 1.25E+08 | 1.25E+08 | FAT4     | 5.90E-05 | + | 1.25E+08 | 1.25E+08 | 0 | 1 | 500,        | 0           | -4.23 | -4.05 | 5.6  | -1.25 | -2.78 |
| chr4  | 77028659 | 77031330 | 11-Sep   | 2.10E-07 | + | 77028659 | 77031330 | 0 | 2 | 102,548,    | 0,2123      | -6.67 | -6.3  | 3.67 | -1.24 | -2.76 |
| chr1  | 1.52E+08 | 1.52E+08 | FLG-AS1  | 0.00048  | + | 1.52E+08 | 1.52E+08 | 0 | 2 | 150,1,      | 0,735       | -3.32 | -2.33 | 1.75 | -1.24 | -2.76 |
| chr16 | 14258133 | 14261930 | MRTFB    | 6.90E-09 | + | 14258133 | 14261930 | 0 | 2 | 28,1022,    | 0,2775      | -8.16 | -7.61 | 12   | -1.23 | -2.75 |
| chr5  | 1.41E+08 | 1.41E+08 | PCDHGA1  | 5.40E-05 | + | 1.41E+08 | 1.41E+08 | 0 | 1 | 201,        | 0           | -4.27 | -4.09 | 6.67 | -1.23 | -2.75 |
| chr19 | 49838685 | 49839634 | MED25    | 2.00E-09 | + | 49838685 | 49839634 | 0 | 1 | 949,        | 0           | -8.7  | -8.07 | 8.89 | -1.23 | -2.74 |
| chr1  | 1.56E+08 | 1.56E+08 | YY1AP1   | 1.00E-09 | - | 1.56E+08 | 1.56E+08 | 0 | 1 | 1140,       | 0           | -8.98 | -8.3  | 3.46 | -1.23 | -2.74 |
| chr18 | 59900046 | 59900438 | PMAIP1   | 0.00047  | + | 59900046 | 59900438 | 0 | 2 | 189,11,     | 0,381       | -3.33 | -2.34 | 2.44 | -1.22 | -2.73 |
| chr5  | 664245   | 664395   | TPPP     | 0.0056   | - | 664245   | 664395   | 0 | 1 | 150,        | 0           | -2.25 | -1.34 | 2.25 | -1.21 | -2.72 |
| chr9  | 38068478 | 38069028 | SHB      | 3.20E-05 | - | 38068478 | 38069028 | 0 | 1 | 550,        | 0           | -4.5  | -4.3  | 7.83 | -1.21 | -2.71 |
| chr10 | 79298413 | 79298513 | ZMIZ1    | 3.30E-05 | + | 79298413 | 79298513 | 0 | 1 | 100,        | 0           | -4.48 | -4.28 | 1.79 | -1.2  | -2.71 |
| chr16 | 3436500  | 3437497  | ZNF597   | 5.10E-09 | - | 3436500  | 3437497  | 0 | 1 | 997,        | 0           | -8.29 | -7.72 | 10.8 | -1.21 | -2.71 |
| chr19 | 38736695 | 38736944 | CAPN12   | 5.60E-05 | - | 38736695 | 38736944 | 0 | 1 | 249,        | 0           | -4.25 | -4.06 | 3.9  | -1.21 | -2.71 |
| chr4  | 94252666 | 94252766 | SMARCAD  | 0.00051  | + | 94252666 | 94252766 | 0 | 1 | 100,        | 0           | -3.29 | -3.15 | 1.83 | -1.2  | -2.7  |
| chr15 | 38326010 | 38326111 | SPRED1   | 0.006    | + | 38326010 | 38326111 | 0 | 1 | 101,        | 0           | -2.22 | -1.31 | 1.55 | -1.2  | -2.7  |
| chr8  | 52656074 | 52657518 | RB1CC1   | 3.00E-09 | - | 52656074 | 52657518 | 0 | 1 | 1444,       | 0           | -8.52 | -7.92 | 8.25 | -1.2  | -2.69 |
| chr10 | 69930055 | 69931224 | COL13A1  | 1.30E-06 | + | 69930055 | 69931224 | 0 | 3 | 32,153,65,  | 0,344,1104  | -5.87 | -4.61 | 1.86 | -1.19 | -2.69 |
| chr11 | 72014838 | 72016233 | AP002490 | 4.10E-10 | + | 72014838 | 72016233 | 0 | 1 | 1395,       | 0           | -9.39 | -8.64 | 2.02 | -1.2  | -2.69 |
| chr8  | 1.44E+08 | 1.44E+08 | EPPK1    | 1.20E-05 | - | 1.44E+08 | 1.44E+08 | 0 | 1 | 150,        | 0           | -4.92 | -3.77 | 3    | -1.2  | -2.69 |
| chr4  | 1.39E+08 | 1.39E+08 | NAA15    | 7.60E-06 | + | 1.39E+08 | 1.39E+08 | 0 | 1 | 200,        | 0           | -5.12 | -4.88 | 1.56 | -1.19 | -2.68 |
| chr15 | 75411722 | 75412991 | SIN3A    | 7.20E-08 | - | 75411722 | 75412991 | 0 | 2 | 21,229,     | 0,1040      | -7.14 | -6.72 | 2.29 | -1.18 | -2.67 |
| chr17 | 38532572 | 38532922 | SRCIN1   | 1.10E-06 | - | 38532572 | 38532922 | 0 | 1 | 350,        | 0           | -5.96 | -5.65 | 5    | -1.18 | -2.67 |
| chr19 | 21057806 | 21058106 | ZNF430   | 1.40E-07 | + | 21057806 | 21058106 | 0 | 1 | 300,        | 0           | -6.85 | -5.47 | 1.75 | -1.17 | -2.66 |
| chr5  | 56922383 | 56922682 | MIER3    | 7.90E-08 | - | 56922383 | 56922682 | 0 | 1 | 299,        | 0           | -7.1  | -5.68 | 2.25 | -1.16 | -2.65 |
| chr19 | 23360455 | 23360705 | ZNF91    | 5.40E-10 | - | 23360455 | 23360705 | 0 | 1 | 250,        | 0           | -9.27 | -8.55 | 1.67 | -1.16 | -2.65 |
| chr9  | 1.37E+08 | 1.37E+08 | AL355987 | 0.003    | + | 1.37E+08 | 1.37E+08 | 0 | 3 | 42,97,61,   | 0,144,914   | -2.53 | -1.6  | 3    | -1.16 | -2.65 |
| chr19 | 48969226 | 48969477 | GYS1     | 2.00E-08 | - | 48969226 | 48969477 | 0 | 1 | 251,        | 0           | -7.7  | -7.2  | 2.68 | -1.16 | -2.64 |
| chr7  | 79453126 | 79453595 | MAGI2-AS | 0.001    | + | 79453126 | 79453595 | 0 | 2 | 65,36,      | 0,433       | -2.98 | -2.01 | 2.75 | -1.16 | -2.64 |
| chr11 | 20118456 | 20118706 | NAV2     | 0.00051  | + | 20118456 | 20118706 | 0 | 1 | 250,        | 0           | -3.29 | -2.3  | 3.75 | -1.16 | -2.63 |
| chr22 | 49903426 | 49904076 | AL671710 | 5.00E-18 | + | 49903426 | 49904076 | 0 | 1 | 650,        | 0           | -17.3 | -15.2 | 5.73 | -1.15 | -2.63 |
| chr1  | 41585020 | 41585220 | HIVEP3   | 0.001    | - | 41585020 | 41585220 | 0 | 1 | 200,        | 0           | -2.99 | -2.03 | 4    | -1.15 | -2.62 |
| chr7  | 1544572  | 1544971  | TMEM184  | 5.60E-05 | - | 1544572  | 1544971  | 0 | 1 | 399,        | 0           | -4.25 | -3.17 | 3.5  | -1.15 | -2.62 |
| chr10 | 91629885 | 91630783 | PPP1R3C  | 1.80E-07 | - | 91629885 | 91630783 | 0 | 1 | 898,        | 0           | -6.75 | -6.37 | 5.25 | -1.14 | -2.61 |
| chr1  | 1.46E+08 | 1.46E+08 | POLR3C   | 0.00013  | + | 1.46E+08 | 1.46E+08 | 0 | 1 | 251,        | 0           | -3.88 | -2.83 | 2    | -1.14 | -2.61 |
| chr17 | 63426001 | 63426800 | TANC2    | 2.30E-08 | + | 63426001 | 63426800 | 0 | 1 | 799,        | 0           | -7.64 | -7.15 | 5.55 | -1.12 | -2.59 |
| chr9  | 86946058 | 86946208 | GAS1     | 1.00E-05 | - | 86946058 | 86946208 | 0 | 1 | 150,        | 0           | -4.99 | -3.84 | 4    | -1.12 | -2.59 |
| chr10 | 1.14E+08 | 1.14E+08 | ABLIM1   | 3.70E-07 | - | 1.14E+08 | 1.14E+08 | 0 | 2 | 371,30,     | 0,1841      | -6.43 | -6.09 | 4.14 | -1.12 | -2.58 |
| chr8  | 30836966 | 30842096 | TEX15    | 2.30E-07 | - | 30836966 | 30842096 | 0 | 3 | 1095,59,93, | 0,2939,5037 | -6.64 | -6.27 | 6.2  | -1.12 | -2.58 |
| chr16 | 89227394 | 89228891 | ZNF778   | 4.90E-07 | + | 89227394 | 89228891 | 0 | 1 | 1497,       | 0           | -6.31 | -5.97 | 7.17 | -1.12 | -2.58 |
| chr6  | 1.46E+08 | 1.46E+08 | FBXO30   | 7.90E-26 | - | 1.46E+08 | 1.46E+08 | 0 | 2 | 1847,193,   | 0,10028     | -25.1 | -22.5 | 6.67 | -1.11 | -2.57 |
| chr22 | 37024702 | 37024802 | MPST     | 1.70E-07 | + | 37024702 | 37024802 | 0 | 1 | 100,        | 0           | -6.78 | -6.4  | 1.67 | -1.12 | -2.57 |
| chr19 | 9529368  | 9529619  | ZNF426   | 1.10E-05 | - | 9529368  | 9529619  | 0 | 1 | 251,        | 0           | -4.94 | -3.79 | 6.25 | -1.11 | -2.57 |

|       |          |          |           |          |   |          |          |   |   |           |        |       |       |      |       |       |
|-------|----------|----------|-----------|----------|---|----------|----------|---|---|-----------|--------|-------|-------|------|-------|-------|
| chr14 | 34775987 | 34776188 | BAZ1A     | 6.30E-06 | - | 34775987 | 34776188 | 0 | 1 | 201,      | 0      | -5.2  | -4.96 | 2.69 | -1.11 | -2.57 |
| chr11 | 94180059 | 94181870 | PANX1     | 1.90E-08 | + | 94180059 | 94181870 | 0 | 2 | 198,1081, | 0,730  | -7.71 | -7.21 | 14.7 | -1.11 | -2.56 |
| chr1  | 11273255 | 11273654 | UBIAD1    | 1.30E-08 | + | 11273255 | 11273654 | 0 | 1 | 399,      | 0      | -7.9  | -6.37 | 2.57 | -1.11 | -2.56 |
| chr6  | 89864021 | 89864221 | CASP8AP2  | 2.60E-06 | + | 89864021 | 89864221 | 0 | 1 | 200,      | 0      | -5.58 | -5.31 | 7    | -1.1  | -2.55 |
| chr9  | 1.35E+08 | 1.35E+08 | PPP1R26   | 1.00E-08 | + | 1.35E+08 | 1.35E+08 | 0 | 1 | 596,      | 0      | -8    | -7.47 | 7    | -1.1  | -2.55 |
| chr1  | 2.47E+08 | 2.47E+08 | ZNF695    | 1.40E-07 | - | 2.47E+08 | 2.47E+08 | 0 | 1 | 940,      | 0      | -6.84 | -6.45 | 5.33 | -1.11 | -2.55 |
| chr7  | 1.27E+08 | 1.27E+08 | ZNF800    | 0.00035  | - | 1.27E+08 | 1.27E+08 | 0 | 1 | 301,      | 0      | -3.45 | -3.3  | 5.8  | -1.09 | -2.54 |
| chr11 | 64227279 | 64227379 | NUDT22    | 3.70E-05 | + | 64227279 | 64227379 | 0 | 1 | 100,      | 0      | -4.43 | -3.33 | 1.78 | -1.09 | -2.53 |
| chr13 | 95676256 | 95676706 | DNAJC3-C  | 1.20E-06 | - | 95676256 | 95676706 | 0 | 1 | 450,      | 0      | -5.92 | -5.62 | 7.33 | -1.09 | -2.53 |
| chr2  | 1.99E+08 | 1.99E+08 | SATB2     | 0.00019  | - | 1.99E+08 | 1.99E+08 | 0 | 1 | 150,      | 0      | -3.73 | -2.71 | 1.89 | -1.08 | -2.52 |
| chr9  | 1.36E+08 | 1.36E+08 | CAMSAP1   | 3.50E-07 | - | 1.36E+08 | 1.36E+08 | 0 | 2 | 939,57,   | 0,1628 | -6.46 | -6.11 | 7.92 | -1.08 | -2.52 |
| chr12 | 65824479 | 65824978 | HMG2      | 4.00E-11 | + | 65824479 | 65824978 | 0 | 1 | 499,      | 0      | -10.4 | -9.44 | 2.19 | -1.08 | -2.52 |
| chr10 | 89014220 | 89014470 | FAS       | 0.00055  | + | 89014220 | 89014470 | 0 | 1 | 250,      | 0      | -3.26 | -3.11 | 8.57 | -1.08 | -2.51 |
| chr11 | 1.23E+08 | 1.23E+08 | JHY       | 8.90E-05 | + | 1.23E+08 | 1.23E+08 | 0 | 1 | 200,      | 0      | -4.05 | -2.99 | 2.75 | -1.08 | -2.51 |
| chr3  | 69047961 | 69051991 | TMF1      | 5.90E-08 | - | 69047961 | 69051991 | 0 | 2 | 601,47,   | 0,3983 | -7.23 | -6.79 | 7.14 | -1.08 | -2.51 |
| chr8  | 1.23E+08 | 1.23E+08 | ZHX1      | 4.60E-09 | - | 1.23E+08 | 1.23E+08 | 0 | 2 | 776,73,   | 0,1637 | -8.34 | -7.76 | 4.59 | -1.08 | -2.51 |
| chr15 | 85579868 | 85580169 | AKAP13    | 3.20E-07 | + | 85579868 | 85580169 | 0 | 1 | 301,      | 0      | -6.5  | -6.15 | 2.72 | -1.08 | -2.51 |
| chr1  | 28496581 | 28496880 | PHACTR4   | 2.90E-08 | + | 28496581 | 28496880 | 0 | 1 | 299,      | 0      | -7.54 | -7.07 | 3.83 | -1.08 | -2.51 |
| chr19 | 52034070 | 52034670 | ZNF432    | 3.00E-05 | - | 52034070 | 52034670 | 0 | 1 | 600,      | 0      | -4.52 | -4.31 | 7.71 | -1.08 | -2.51 |
| chr2  | 38070846 | 38071146 | CYP1B1    | 3.80E-08 | - | 38070846 | 38071146 | 0 | 1 | 300,      | 0      | -7.42 | -6.97 | 4.31 | -1.07 | -2.5  |
| chr5  | 1.76E+08 | 1.76E+08 | ARL10     | 0.0035   | + | 1.76E+08 | 1.76E+08 | 0 | 2 | 112,88,   | 0,2337 | -2.46 | -2.34 | 1.93 | -1.07 | -2.5  |
| chr17 | 7512829  | 7514071  | POLR2A    | 7.90E-16 | + | 7512829  | 7514071  | 0 | 2 | 94,1051,  | 0,191  | -15.1 | -13.2 | 2.45 | -1.07 | -2.5  |
| chr15 | 48756007 | 48760236 | CEP152    | 4.80E-08 | - | 48756007 | 48760236 | 0 | 2 | 546,102,  | 0,4127 | -7.32 | -6.87 | 6.33 | -1.07 | -2.49 |
| chr11 | 26565260 | 26565411 | MUC15     | 7.40E-07 | - | 26565260 | 26565411 | 0 | 1 | 151,      | 0      | -6.13 | -5.81 | 3.54 | -1.07 | -2.49 |
| chr1  | 1.2E+08  | 1.2E+08  | NOTCH2    | 2.00E-11 | - | 1.2E+08  | 1.2E+08  | 0 | 1 | 1149,     | 0      | -10.7 | -9.69 | 8.33 | -1.06 | -2.48 |
| chr19 | 43847017 | 43848517 | ZNF283    | 8.10E-10 | + | 43847017 | 43848517 | 0 | 1 | 1500,     | 0      | -9.09 | -8.4  | 11.8 | -1.06 | -2.48 |
| chr12 | 89522801 | 89524497 | GALNT4    | 1.60E-13 | - | 89522801 | 89524497 | 0 | 1 | 1696,     | 0      | -12.8 | -11.3 | 7.62 | -1.06 | -2.48 |
| chr16 | 4804543  | 4805290  | GLYR1     | 6.00E-09 | - | 4804543  | 4805290  | 0 | 1 | 747,      | 0      | -8.22 | -7.66 | 4.72 | -1.05 | -2.47 |
| chr1  | 1.12E+08 | 1.12E+08 | AL049557. | 6.50E-06 | - | 1.12E+08 | 1.12E+08 | 0 | 1 | 250,      | 0      | -5.19 | -4.01 | 4.6  | -1.05 | -2.47 |
| chr2  | 71348809 | 71350207 | ZNF638    | 7.90E-11 | + | 71348809 | 71350207 | 0 | 1 | 1398,     | 0      | -10.1 | -9.23 | 8.14 | -1.05 | -2.46 |
| chr12 | 48343309 | 48343709 | ZNF641    | 5.50E-10 | - | 48343309 | 48343709 | 0 | 1 | 400,      | 0      | -9.26 | -8.54 | 4.79 | -1.04 | -2.46 |
| chr1  | 93154670 | 93156067 | TMED5     | 3.90E-09 | - | 93154670 | 93156067 | 0 | 2 | 218,32,   | 0,1365 | -8.41 | -7.83 | 2.25 | -1.04 | -2.45 |
| chr1  | 1.97E+08 | 1.97E+08 | ZBTB41    | 1.50E-08 | - | 1.97E+08 | 1.97E+08 | 0 | 1 | 399,      | 0      | -7.83 | -7.32 | 3.21 | -1.04 | -2.45 |
| chr20 | 35503423 | 35507752 | CEP250    | 1.00E-09 | + | 35503423 | 35507752 | 0 | 2 | 1582,15,  | 0,4314 | -8.99 | -8.31 | 6.07 | -1.03 | -2.44 |
| chr5  | 1.81E+08 | 1.81E+08 | LINC01962 | 3.20E-05 | - | 1.81E+08 | 1.81E+08 | 0 | 2 | 112,335,  | 0,271  | -4.5  | -3.4  | 4.4  | -1.03 | -2.44 |
| chr10 | 73125012 | 73125405 | AC016394. | 3.20E-15 | - | 73125012 | 73125405 | 0 | 1 | 393,      | 0      | -14.5 | -11.6 | 6    | -1.03 | -2.44 |
| chr19 | 5244350  | 5245943  | PTPRS     | 1.30E-06 | - | 5244350  | 5245943  | 0 | 2 | 132,168,  | 0,1425 | -5.88 | -5.58 | 2.47 | -1.02 | -2.43 |
| chr15 | 52313526 | 52313826 | MYO5A     | 0.0045   | - | 52313526 | 52313826 | 0 | 1 | 300,      | 0      | -2.35 | -1.44 | 2.5  | -1.03 | -2.43 |
| chr9  | 1.22E+08 | 1.22E+08 | DAB2IP    | 5.80E-07 | + | 1.22E+08 | 1.22E+08 | 0 | 1 | 350,      | 0      | -6.24 | -5.91 | 3.14 | -1.02 | -2.42 |
| chr22 | 24542363 | 24543851 | GUCD1     | 1.30E-12 | - | 24542363 | 24543851 | 0 | 2 | 737,10,   | 0,1478 | -11.9 | -10.6 | 5.53 | -1.02 | -2.42 |
| chr1  | 2.05E+08 | 2.05E+08 | NFASC     | 0.00071  | + | 2.05E+08 | 2.05E+08 | 0 | 1 | 201,      | 0      | -3.15 | -2.17 | 3.25 | -1.02 | -2.42 |
| chr8  | 22690946 | 22691147 | EGR3      | 8.90E-06 | - | 22690946 | 22691147 | 0 | 1 | 201,      | 0      | -5.05 | -3.89 | 6.33 | -1.02 | -2.42 |
| chr16 | 89228512 | 89228692 | AC009113. | 1.10E-05 | - | 89228512 | 89228692 | 0 | 1 | 180,      | 0      | -4.94 | -4.72 | 4.18 | -1.02 | -2.42 |
| chr5  | 55941229 | 55941727 | AC008914. | 1.30E-28 | + | 55941229 | 55941727 | 0 | 1 | 498,      | 0      | -27.9 | -25.3 | 5.33 | -1.02 | -2.42 |
| chr17 | 58495569 | 58503780 | MTMR4     | 2.30E-09 | - | 58495569 | 58503780 | 0 | 2 | 761,37,   | 0,8174 | -8.63 | -8.01 | 8.37 | -1.01 | -2.41 |
| chr14 | 60646061 | 60648763 | SIX1      | 5.40E-08 | - | 60646061 | 60648763 | 0 | 2 | 516,134,  | 0,2568 | -7.27 | -6.83 | 3.32 | -1.01 | -2.41 |
| chr15 | 68206167 | 68206318 | AC107871. | 4.10E-05 | - | 68206167 | 68206318 | 0 | 1 | 151,      | 0      | -4.39 | -3.3  | 3.57 | -1.01 | -2.41 |
| chr10 | 73125046 | 73125241 | AC016394. | 5.10E-05 | - | 73125046 | 73125241 | 0 | 1 | 195,      | 0      | -4.29 | -3.21 | 3.75 | -1.01 | -2.41 |
| chr19 | 44289049 | 44289200 | ZNF235    | 0.00028  | - | 44289049 | 44289200 | 0 | 1 | 151,      | 0      | -3.55 | -2.53 | 4    | -1.01 | -2.4  |
| chr1  | 2.05E+08 | 2.05E+08 | NUAK2     | 0.0036   | - | 2.05E+08 | 2.05E+08 | 0 | 1 | 201,      | 0      | -2.44 | -1.52 | 3.4  | -1    | -2.4  |
| chr15 | 84783539 | 84784190 | ZNF592    | 1.50E-08 | + | 84783539 | 84784190 | 0 | 1 | 651,      | 0      | -7.83 | -7.32 | 3.1  | -1.01 | -2.4  |

|       |          |          |          |          |   |          |          |   |   |          |         |       |       |      |        |       |
|-------|----------|----------|----------|----------|---|----------|----------|---|---|----------|---------|-------|-------|------|--------|-------|
| chr5  | 1.78E+08 | 1.78E+08 | DDX41    | 2.20E-06 | - | 1.78E+08 | 1.78E+08 | 0 | 1 | 200,     | 0       | -5.65 | -5.37 | 1.51 | -1.01  | -2.4  |
| chr12 | 1.2E+08  | 1.2E+08  | GATC     | 8.50E-07 | + | 1.2E+08  | 1.2E+08  | 0 | 1 | 447,     | 0       | -6.07 | -5.75 | 4.5  | -1.01  | -2.4  |
| chr6  | 63685367 | 63685917 | PHF3     | 1.20E-10 | + | 63685367 | 63685917 | 0 | 1 | 550,     | 0       | -9.93 | -9.08 | 6.53 | -0.998 | -2.39 |
| chr5  | 1.38E+08 | 1.38E+08 | KDM3B    | 2.30E-09 | + | 1.38E+08 | 1.38E+08 | 0 | 2 | 457,42,  | 0,1366  | -8.64 | -8.02 | 4.27 | -0.998 | -2.39 |
| chr20 | 63931155 | 63931688 | DNAJC5   | 4.40E-07 | + | 63931155 | 63931688 | 0 | 2 | 27,224,  | 0,309   | -6.36 | -6.02 | 2.42 | -0.993 | -2.38 |
| chr17 | 17794639 | 17796382 | RAI1     | 1.70E-08 | + | 17794639 | 17796382 | 0 | 1 | 1743,    | 0       | -7.77 | -7.27 | 9.11 | -0.994 | -2.38 |
| chr12 | 54017262 | 54028880 | HOXC6    | 7.90E-12 | + | 54017262 | 54028880 | 0 | 2 | 152,441, | 0,11177 | -11.1 | -9.99 | 3.13 | -0.991 | -2.38 |
| chr2  | 88857350 | 88857588 | IGKC     | 0.0012   | - | 88857350 | 88857588 | 0 | 1 | 238,     | 0       | -2.91 | -2.78 | 1.92 | -0.995 | -2.38 |
| chr15 | 63046871 | 63046971 | TPM1-AS  | 0.00065  | - | 63046871 | 63046971 | 0 | 1 | 100,     | 0       | -3.19 | -2.2  | 2    | -0.997 | -2.38 |
| chr9  | 1.31E+08 | 1.31E+08 | PRRC2B   | 1.90E-09 | + | 1.31E+08 | 1.31E+08 | 0 | 1 | 1450,    | 0       | -8.72 | -8.09 | 2.75 | -0.989 | -2.37 |
| chr18 | 35337121 | 35337821 | ZNF24    | 9.10E-10 | - | 35337121 | 35337821 | 0 | 1 | 700,     | 0       | -9.04 | -8.36 | 4.14 | -0.988 | -2.37 |
| chr6  | 30292567 | 30292667 | HLA-L    | 1.80E-06 | + | 30292567 | 30292667 | 0 | 1 | 100,     | 0       | -5.75 | -5.46 | 2.7  | -0.989 | -2.37 |
| chr11 | 45933668 | 45934268 | PHF21A   | 1.30E-09 | - | 45933668 | 45934268 | 0 | 1 | 600,     | 0       | -8.88 | -8.22 | 6.2  | -0.981 | -2.36 |
| chr6  | 16144971 | 16145121 | MYLIP    | 0.00014  | + | 16144971 | 16145121 | 0 | 1 | 150,     | 0       | -3.86 | -2.82 | 2.75 | -0.977 | -2.35 |
| chr17 | 43092536 | 43092736 | BRCA1    | 6.80E-07 | - | 43092536 | 43092736 | 0 | 1 | 200,     | 0       | -6.17 | -4.87 | 2.55 | -0.977 | -2.35 |
| chr12 | 440914   | 441992   | CCDC77   | 6.00E-05 | + | 440914   | 441992   | 0 | 2 | 82,219,  | 0,859   | -4.22 | -4.03 | 4.17 | -0.974 | -2.35 |
| chr13 | 23334114 | 23334514 | SACS     | 4.00E-04 | - | 23334114 | 23334514 | 0 | 1 | 400,     | 0       | -3.4  | -3.25 | 4.43 | -0.972 | -2.35 |
| chr13 | 87677514 | 87678512 | SLITRK5  | 1.00E-13 | + | 87677514 | 87678512 | 0 | 1 | 998,     | 0       | -1.3  | -11.5 | 10.7 | -0.977 | -2.35 |
| chr22 | 41149171 | 41150007 | EP300    | 7.60E-07 | + | 41149171 | 41150007 | 0 | 2 | 4,247,   | 0,589   | -6.12 | -5.8  | 1.62 | -0.972 | -2.34 |
| chr14 | 37622592 | 37622941 | TTC6     | 0.00045  | + | 37622592 | 37622941 | 0 | 1 | 349,     | 0       | -3.35 | -2.36 | 2.75 | -0.97  | -2.34 |
| chr1  | 21453462 | 21453761 | NBPF3    | 1.00E-07 | + | 21453462 | 21453761 | 0 | 1 | 299,     | 0       | -6.99 | -5.59 | 2.75 | -0.969 | -2.34 |
| chr3  | 1.24E+08 | 1.24E+08 | CCDC14   | 0.0011   | - | 1.24E+08 | 1.24E+08 | 0 | 2 | 35.65,   | 0,2278  | -2.96 | -2.83 | 3.8  | -0.972 | -2.34 |
| chr5  | 1.42E+08 | 1.42E+08 | SPRY4    | 1.20E-08 | - | 1.42E+08 | 1.42E+08 | 0 | 1 | 349,     | 0       | -7.93 | -7.41 | 4.23 | -0.969 | -2.34 |
| chr1  | 20720478 | 20720728 | SH2D5    | 4.90E-05 | - | 20720478 | 20720728 | 0 | 1 | 250,     | 0       | -4.31 | -3.22 | 3.71 | -0.971 | -2.34 |
| chr4  | 1.18E+08 | 1.18E+08 | SNHG8    | 1.70E-06 | + | 1.18E+08 | 1.18E+08 | 0 | 1 | 299,     | 0       | -5.78 | -4.54 | 5.5  | -0.969 | -2.34 |
| chr1  | 15734121 | 15734371 | PLEKHM2  | 0.0015   | + | 15734121 | 15734371 | 0 | 1 | 250,     | 0       | -2.83 | -2.7  | 3.07 | -0.962 | -2.33 |
| chr1  | 2.1E+08  | 2.1E+08  | UTP25    | 1.70E-07 | + | 2.1E+08  | 2.1E+08  | 0 | 2 | 46,204,  | 0,1683  | -6.77 | -6.39 | 4.33 | -0.965 | -2.33 |
| chr12 | 1.22E+08 | 1.22E+08 | TMEM120I | 0.00087  | + | 1.22E+08 | 1.22E+08 | 0 | 1 | 150,     | 0       | -3.06 | -2.92 | 3.14 | -0.965 | -2.33 |
| chrX  | 1.54E+08 | 1.54E+08 | ABCD1    | 0.00085  | + | 1.54E+08 | 1.54E+08 | 0 | 1 | 251,     | 0       | -3.07 | -2.93 | 2.53 | -0.96  | -2.32 |
| chr6  | 1.38E+08 | 1.38E+08 | TNFAIP3  | 0.003    | + | 1.38E+08 | 1.38E+08 | 0 | 1 | 249,     | 0       | -2.53 | -1.6  | 3.5  | -0.96  | -2.32 |
| chr1  | 39388210 | 39409504 | MACF1    | 2.00E-08 | + | 39388210 | 39409504 | 0 | 2 | 448,2,   | 0,21292 | -7.69 | -7.19 | 5.56 | -0.96  | -2.32 |
| chr19 | 53410164 | 53410315 | ZNF765   | 5.50E-07 | + | 53410164 | 53410315 | 0 | 1 | 151,     | 0       | -6.26 | -4.95 | 3    | -0.96  | -2.32 |
| chr1  | 47433656 | 47433805 | FOXD2-AS | 0.0015   | - | 47433656 | 47433805 | 0 | 1 | 149,     | 0       | -2.83 | -1.88 | 2.4  | -0.961 | -2.32 |
| chr9  | 1.12E+08 | 1.12E+08 | ZNF483   | 3.30E-10 | + | 1.12E+08 | 1.12E+08 | 0 | 1 | 1797,    | 0       | -9.48 | -8.71 | 17   | -0.959 | -2.31 |
| chr19 | 52906413 | 52907362 | ZNF888   | 1.20E-05 | - | 52906413 | 52907362 | 0 | 1 | 949,     | 0       | -4.93 | -4.7  | 4.83 | -0.951 | -2.31 |
| chr1  | 2.24E+08 | 2.24E+08 | DEGS1    | 0.00025  | + | 2.24E+08 | 2.24E+08 | 0 | 1 | 101,     | 0       | -3.6  | -3.45 | 1.86 | -0.951 | -2.3  |
| chr12 | 1.21E+08 | 1.21E+08 | CABP1    | 2.80E-05 | + | 1.21E+08 | 1.21E+08 | 0 | 1 | 497,     | 0       | -4.55 | -4.34 | 4.2  | -0.946 | -2.3  |
| chr13 | 24302776 | 24302927 | SPATA13  | 6.30E-05 | + | 24302776 | 24302927 | 0 | 1 | 151,     | 0       | -4.2  | -3.13 | 3    | -0.946 | -2.3  |
| chr17 | 30957922 | 30958872 | ADAP2    | 2.00E-06 | + | 30957922 | 30958872 | 0 | 1 | 950,     | 0       | -5.7  | -4.47 | 6.5  | -0.951 | -2.3  |
| chr2  | 87584309 | 87584460 | CYTOR    | 5.20E-07 | + | 87584309 | 87584460 | 0 | 1 | 151,     | 0       | -6.28 | -4.97 | 2.6  | -0.95  | -2.3  |
| chr9  | 1.37E+08 | 1.37E+08 | TRAF2    | 6.90E-09 | + | 1.37E+08 | 1.37E+08 | 0 | 1 | 446,     | 0       | -8.16 | -7.61 | 6.08 | -0.938 | -2.29 |
| chr17 | 2056725  | 2057024  | HIC1     | 5.80E-07 | + | 2056725  | 2057024  | 0 | 1 | 299,     | 0       | -6.24 | -4.94 | 5.29 | -0.937 | -2.29 |
| chr3  | 1.72E+08 | 1.72E+08 | PLD1     | 0.00076  | - | 1.72E+08 | 1.72E+08 | 0 | 1 | 200,     | 0       | -3.12 | -2.14 | 4.25 | -0.928 | -2.27 |
| chr7  | 1.08E+08 | 1.08E+08 | LAMB1    | 9.30E-05 | - | 1.08E+08 | 1.08E+08 | 0 | 1 | 200,     | 0       | -4.03 | -3.86 | 1.52 | -0.928 | -2.27 |
| chr5  | 71509930 | 71511081 | BDP1     | 1.70E-10 | + | 71509930 | 71511081 | 0 | 1 | 1151,    | 0       | -9.76 | -8.94 | 2.65 | -0.927 | -2.27 |
| chr1  | 64691364 | 64692261 | CACHD1   | 4.10E-09 | + | 64691364 | 64692261 | 0 | 1 | 897,     | 0       | -8.39 | -7.81 | 8.8  | -0.928 | -2.27 |
| chr12 | 95209226 | 95209576 | FGD6     | 3.20E-09 | - | 95209226 | 95209576 | 0 | 1 | 350,     | 0       | -8.49 | -7.9  | 5.3  | -0.926 | -2.27 |
| chr11 | 60936311 | 60937159 | TMEM132, | 3.10E-09 | + | 60936311 | 60937159 | 0 | 1 | 848,     | 0       | -8.51 | -7.91 | 7.17 | -0.922 | -2.26 |
| chr8  | 25413163 | 25413314 | DOCK5    | 7.60E-05 | + | 25413163 | 25413314 | 0 | 1 | 151,     | 0       | -4.12 | -3.06 | 2.17 | -0.922 | -2.26 |
| chr14 | 60648862 | 60649063 | SIX1     | 5.40E-08 | - | 60648862 | 60649063 | 0 | 1 | 201,     | 0       | -7.27 | -6.83 | 1.35 | -0.911 | -2.25 |
| chr7  | 5065361  | 5065859  | RBAK     | 1.00E-06 | + | 5065361  | 5065859  | 0 | 1 | 498,     | 0       | -5.98 | -5.67 | 4.47 | -0.911 | -2.25 |



|       |          |          |           |          |   |          |          |   |   |          |        |       |       |      |        |       |
|-------|----------|----------|-----------|----------|---|----------|----------|---|---|----------|--------|-------|-------|------|--------|-------|
| chr10 | 43644005 | 43644249 | ZNF32     | 3.50E-06 | - | 43644005 | 43644249 | 0 | 1 | 244,     | 0      | -5.45 | -5.19 | 1.78 | -0.911 | -2.25 |
| chr16 | 15586853 | 15587249 | BMERB1    | 6.30E-06 | + | 15586853 | 15587249 | 0 | 1 | 396,     | 0      | -5.2  | -4.96 | 3.1  | -0.909 | -2.24 |
| chr17 | 2058615  | 2058914  | HIC1      | 5.80E-07 | + | 2058615  | 2058914  | 0 | 1 | 299,     | 0      | -6.24 | -4.94 | 5    | -0.909 | -2.24 |
| chr12 | 1.33E+08 | 1.33E+08 | ZNF140    | 2.60E-08 | + | 1.33E+08 | 1.33E+08 | 0 | 1 | 548,     | 0      | -7.58 | -7.1  | 4    | -0.907 | -2.24 |
| chr19 | 16652500 | 16652949 | SMIM7     | 1.30E-05 | - | 16652500 | 16652949 | 0 | 1 | 449,     | 0      | -4.87 | -4.65 | 7.4  | -0.909 | -2.24 |
| chr1  | 2.04E+08 | 2.04E+08 | ZBED6     | 0.00063  | + | 2.04E+08 | 2.04E+08 | 0 | 1 | 200,     | 0      | -3.2  | -3.06 | 1.75 | -0.909 | -2.24 |
| chrX  | 53085741 | 53086291 | TSPYL2    | 4.00E-12 | + | 53085741 | 53086291 | 0 | 1 | 550,     | 0      | -11.4 | -10.2 | 2.62 | -0.901 | -2.23 |
| chr3  | 69048279 | 69048629 | AC109587  | 5.40E-08 | + | 69048279 | 69048629 | 0 | 1 | 350,     | 0      | -7.27 | -6.83 | 5.17 | -0.902 | -2.23 |
| chr1  | 12282956 | 12283256 | VPS13D    | 1.30E-05 | + | 12282956 | 12283256 | 0 | 1 | 300,     | 0      | -4.87 | -4.65 | 2.92 | -0.894 | -2.22 |
| chr1  | 52897056 | 52897356 | ECHDC2    | 4.20E-07 | - | 52897056 | 52897356 | 0 | 1 | 300,     | 0      | -6.38 | -5.06 | 3.83 | -0.896 | -2.22 |
| chr1  | 1.74E+08 | 1.74E+08 | RC3H1     | 3.00E-05 | - | 1.74E+08 | 1.74E+08 | 0 | 2 | 128,23,  | 0,2005 | -4.53 | -4.33 | 1.65 | -0.893 | -2.22 |
| chr10 | 50343592 | 50344340 | SGMS1     | 5.60E-10 | - | 50343592 | 50344340 | 0 | 1 | 748,     | 0      | -9.25 | -8.53 | 8.5  | -0.897 | -2.22 |
| chr6  | 18465042 | 18465143 | RNF144B   | 7.10E-05 | + | 18465042 | 18465143 | 0 | 1 | 101,     | 0      | -4.15 | -3.08 | 2.25 | -0.887 | -2.21 |
| chr19 | 46411224 | 46413365 | CCDC8     | 1.20E-07 | - | 46411224 | 46413365 | 0 | 1 | 2141,    | 0      | -6.92 | -6.52 | 6.48 | -0.887 | -2.21 |
| chr17 | 40279252 | 40279502 | WIPF2     | 5.00E-07 | + | 40279252 | 40279502 | 0 | 1 | 250,     | 0      | -6.3  | -5.96 | 2    | -0.887 | -2.21 |
| chr10 | 96984522 | 96985621 | LCOR      | 1.00E-12 | + | 96984522 | 96985621 | 0 | 1 | 1099,    | 0      | -12   | -10.7 | 9.77 | -0.89  | -2.21 |
| chr15 | 25115383 | 25115534 | SNHG14    | 2.60E-08 | + | 25115383 | 25115534 | 0 | 1 | 151,     | 0      | -7.59 | -7.11 | 1.67 | -0.888 | -2.21 |
| chr12 | 49389763 | 49390112 | AC125611  | 5.90E-07 | + | 49389763 | 49390112 | 0 | 1 | 349,     | 0      | -6.23 | -5.9  | 7    | -0.887 | -2.21 |
| chr19 | 49838687 | 49839628 | PTOV1-AS  | 1.30E-09 | - | 49838687 | 49839628 | 0 | 1 | 941,     | 0      | -8.89 | -8.23 | 9.44 | -0.888 | -2.21 |
| chr19 | 46775429 | 46775678 | SLC1A5    | 1.10E-09 | - | 46775429 | 46775678 | 0 | 1 | 249,     | 0      | -8.97 | -8.3  | 2.54 | -0.881 | -2.2  |
| chr1  | 1.1E+08  | 1.1E+08  | KCNC4     | 0.00014  | + | 1.1E+08  | 1.1E+08  | 0 | 1 | 101,     | 0      | -3.84 | -2.8  | 1.83 | -0.881 | -2.2  |
| chr10 | 13630276 | 13632618 | AL157392  | 1.20E-06 | + | 13630276 | 13632618 | 0 | 2 | 189,59,  | 0,2283 | -5.91 | -5.61 | 5.83 | -0.884 | -2.2  |
| chr18 | 80137159 | 80137409 | ADNP2     | 9.80E-08 | + | 80137159 | 80137409 | 0 | 1 | 250,     | 0      | -7.01 | -6.6  | 2.67 | -0.877 | -2.19 |
| chr10 | 24619796 | 24620145 | ARHGAP2   | 1.70E-08 | - | 24619796 | 24620145 | 0 | 1 | 349,     | 0      | -7.76 | -7.26 | 3.88 | -0.878 | -2.19 |
| chr19 | 23358463 | 23359311 | ZNF91     | 5.40E-10 | - | 23358463 | 23359311 | 0 | 1 | 848,     | 0      | -9.27 | -8.55 | 4.9  | -0.873 | -2.19 |
| chr16 | 31915561 | 31915662 | ZNF267    | 5.90E-10 | + | 31915561 | 31915662 | 0 | 1 | 101,     | 0      | -9.23 | -8.51 | 3.17 | -0.878 | -2.19 |
| chr19 | 36718952 | 36720594 | ZNF567    | 2.00E-11 | + | 36718952 | 36720594 | 0 | 1 | 1642,    | 0      | -10.7 | -9.69 | 7.38 | -0.878 | -2.19 |
| chr8  | 1.15E+08 | 1.15E+08 | TRPS1     | 4.50E-08 | - | 1.15E+08 | 1.15E+08 | 0 | 1 | 949,     | 0      | -7.35 | -6.9  | 6.7  | -0.866 | -2.18 |
| chr12 | 45924863 | 45927129 | SCAF11    | 6.80E-10 | - | 45924863 | 45927129 | 0 | 2 | 211,988, | 0,1278 | -9.17 | -8.47 | 5.63 | -0.859 | -2.17 |
| chr4  | 1.25E+08 | 1.25E+08 | FAT4      | 0.0014   | + | 1.25E+08 | 1.25E+08 | 0 | 1 | 401,     | 0      | -2.84 | -2.71 | 8.67 | -0.866 | -2.17 |
| chr5  | 711249   | 711399   | DZHHHC11  | 1.00E-11 | - | 711249   | 711399   | 0 | 1 | 150,     | 0      | -11   | -8.89 | 1.57 | -0.864 | -2.17 |
| chr8  | 25411564 | 25412165 | DOCK5     | 4.80E-07 | + | 25411564 | 25412165 | 0 | 1 | 601,     | 0      | -6.32 | -5.98 | 7.75 | -0.855 | -2.16 |
| chr19 | 52033472 | 52033622 | ZNF432    | 3.00E-05 | - | 52033472 | 52033622 | 0 | 1 | 150,     | 0      | -4.52 | -3.41 | 3.38 | -0.859 | -2.16 |
| chr5  | 51393543 | 51394137 | ISL1      | 3.50E-08 | + | 51393543 | 51394137 | 0 | 1 | 594,     | 0      | -7.46 | -7    | 7.44 | -0.839 | -2.14 |
| chr7  | 99901282 | 99901632 | TRIM4     | 0.00011  | - | 99901282 | 99901632 | 0 | 1 | 350,     | 0      | -3.95 | -2.9  | 4.57 | -0.838 | -2.14 |
| chr8  | 22102960 | 22103311 | FAM160B2  | 4.30E-06 | + | 22102960 | 22103311 | 0 | 1 | 351,     | 0      | -5.37 | -5.12 | 2.5  | -0.843 | -2.14 |
| chr2  | 1.11E+08 | 1.11E+08 | MIR4435-2 | 2.00E-05 | - | 1.11E+08 | 1.11E+08 | 0 | 1 | 200,     | 0      | -4.69 | -3.56 | 4    | -0.842 | -2.14 |
| chrX  | 3605510  | 3605611  | PRKX      | 0.0014   | - | 3605510  | 3605611  | 0 | 1 | 101,     | 0      | -2.85 | -1.9  | 2.56 | -0.836 | -2.14 |
| chr8  | 1.44E+08 | 1.44E+08 | EPPK1     | 2.20E-06 | - | 1.44E+08 | 1.44E+08 | 0 | 1 | 151,     | 0      | -5.65 | -4.42 | 5.5  | -0.838 | -2.14 |
| chr6  | 1.11E+08 | 1.11E+08 | REV3L     | 1.20E-08 | - | 1.11E+08 | 1.11E+08 | 0 | 2 | 437,662, | 0,5004 | -7.92 | -7.4  | 5.67 | -0.836 | -2.13 |
| chr2  | 71426487 | 71428552 | ZNF638    | 1.40E-10 | + | 71426487 | 71428552 | 0 | 2 | 927,22,  | 0,2043 | -9.85 | -9.01 | 3.19 | -0.835 | -2.13 |
| chr7  | 1.17E+08 | 1.17E+08 | MET       | 0.0039   | + | 1.17E+08 | 1.17E+08 | 0 | 1 | 151,     | 0      | -2.41 | -1.49 | 3.5  | -0.835 | -2.13 |
| chr11 | 1.19E+08 | 1.19E+08 | KMT2A     | 3.50E-10 | + | 1.19E+08 | 1.19E+08 | 0 | 1 | 301,     | 0      | -9.46 | -8.69 | 4.25 | -0.835 | -2.13 |
| chr4  | 1.47E+08 | 1.47E+08 | SLC10A7   | 0.00014  | - | 1.47E+08 | 1.47E+08 | 0 | 1 | 151,     | 0      | -3.84 | -2.8  | 2    | -0.835 | -2.13 |
| chr19 | 43598869 | 43599566 | ZNF576    | 4.00E-12 | + | 43598869 | 43599566 | 0 | 1 | 697,     | 0      | -11.4 | -10.3 | 12.3 | -0.836 | -2.13 |
| chr14 | 58138360 | 58138461 | ARMH4     | 0.00017  | - | 58138360 | 58138461 | 0 | 1 | 101,     | 0      | -3.78 | -2.75 | 2.75 | -0.835 | -2.13 |
| chr3  | 69047464 | 69047863 | TMF1      | 5.90E-08 | - | 69047464 | 69047863 | 0 | 1 | 399,     | 0      | -7.23 | -6.79 | 6.17 | -0.836 | -2.13 |
| chr19 | 53457017 | 53457714 | ZNF761    | 9.10E-06 | + | 53457017 | 53457714 | 0 | 1 | 697,     | 0      | -5.04 | -4.81 | 8.8  | -0.836 | -2.13 |
| chr17 | 75706814 | 75707064 | SAP30BP   | 1.00E-06 | + | 75706814 | 75707064 | 0 | 1 | 250,     | 0      | -6    | -5.69 | 3.2  | -0.835 | -2.13 |
| chr9  | 86946407 | 86946508 | GAS1      | 1.00E-05 | - | 86946407 | 86946508 | 0 | 1 | 101,     | 0      | -4.99 | -3.84 | 2.75 | -0.836 | -2.13 |
| chr7  | 1.44E+08 | 1.44E+08 | TCAF1     | 4.50E-10 | - | 1.44E+08 | 1.44E+08 | 0 | 1 | 100,     | 0      | -9.35 | -8.61 | 3.73 | -0.836 | -2.13 |

|       |          |          |          |          |   |          |          |   |   |             |              |   |       |       |      |        |       |
|-------|----------|----------|----------|----------|---|----------|----------|---|---|-------------|--------------|---|-------|-------|------|--------|-------|
| chr12 | 89522806 | 89525186 | POC1B-G/ | 6.30E-13 | - | 89522806 | 89525186 | 0 | 2 | 1634,67,    | 0,2313       |   | -12.2 | -10.8 | 9    | -0.835 | -2.13 |
| chr11 | 95067892 | 95068490 | SRSF8    | 9.10E-06 | + | 95067892 | 95068490 | 0 | 1 | 598,        |              | 0 | -5.04 | -4.81 | 5.7  | -0.835 | -2.13 |
| chr1  | 85495147 | 85495345 | AC092807 | 2.00E-06 | - | 85495147 | 85495345 | 0 | 1 | 198,        |              | 0 | -5.69 | -4.46 | 2.5  | -0.836 | -2.13 |
| chr5  | 80437580 | 80438380 | ZFYVE16  | 1.50E-09 | + | 80437580 | 80438380 | 0 | 1 | 800,        |              | 0 | -8.83 | -8.18 | 5.05 | -0.831 | -2.12 |
| chr10 | 38117565 | 38119364 | ZNF37A   | 6.60E-09 | + | 38117565 | 38119364 | 0 | 1 | 1799,       |              | 0 | -8.18 | -7.63 | 9.75 | -0.834 | -2.12 |
| chr9  | 99218106 | 99221041 | ALG2     | 3.50E-09 | - | 99218106 | 99221041 | 0 | 2 | 730,63,     | 0,2872       |   | -8.46 | -7.87 | 4.4  | -0.832 | -2.12 |
| chr1  | 1.6E+08  | 1.6E+08  | PIGM     | 6.00E-10 | - | 1.6E+08  | 1.6E+08  | 0 | 1 | 151,        |              | 0 | -9.22 | -7.46 | 3.78 | -0.832 | -2.12 |
| chr19 | 571376   | 571477   | BSG      | 3.60E-06 | + | 571376   | 571477   | 0 | 1 | 101,        |              | 0 | -5.44 | -4.23 | 2.17 | -0.83  | -2.12 |
| chr18 | 14074509 | 14074960 | ZNF519   | 1.60E-08 | - | 14074509 | 14074960 | 0 | 1 | 451,        |              | 0 | -7.8  | -6.27 | 4    | -0.831 | -2.12 |
| chr19 | 41302912 | 41305769 | HNRNPUL  | 5.40E-07 | + | 41302912 | 41305769 | 0 | 3 | 37,290,124, | 0,1059,2733  |   | -6.27 | -5.94 | 1.94 | -0.828 | -2.11 |
| chr2  | 69519019 | 69520913 | AAK1     | 1.90E-08 | - | 69519019 | 69520913 | 0 | 2 | 221,80,     | 0,1814       |   | -7.71 | -7.21 | 1.67 | -0.828 | -2.11 |
| chr17 | 44557654 | 44558244 | FZD2     | 0.0023   | + | 44557654 | 44558244 | 0 | 1 | 590,        |              | 0 | -2.64 | -2.52 | 3.62 | -0.828 | -2.11 |
| chr15 | 55544366 | 55545313 | PYGO1    | 3.20E-11 | - | 55544366 | 55545313 | 0 | 1 | 947,        |              | 0 | -10.5 | -9.55 | 4.83 | -0.814 | -2.1  |
| chr5  | 73911332 | 73911583 | ARHGFE28 | 5.80E-05 | + | 73911332 | 73911583 | 0 | 1 | 251,        |              | 0 | -4.24 | -3.16 | 2.86 | -0.817 | -2.1  |
| chr9  | 38567308 | 38567809 | SNX18P3  | 0.0011   | - | 38567308 | 38567809 | 0 | 1 | 501,        |              | 0 | -2.95 | -1.99 | 5.4  | -0.818 | -2.1  |
| chr19 | 14052217 | 14053018 | IL27RA   | 1.10E-10 | + | 14052217 | 14053018 | 0 | 1 | 801,        |              | 0 | -9.96 | -9.1  | 7.71 | -0.811 | -2.09 |
| chr7  | 66359039 | 66359952 | TPST1    | 3.10E-07 | + | 66359039 | 66359952 | 0 | 2 | 434,58,     | 0,855        |   | -6.51 | -6.16 | 9.5  | -0.806 | -2.09 |
| chr12 | 95209775 | 95210126 | FGD6     | 3.20E-09 | - | 95209775 | 95210126 | 0 | 1 | 351,        |              | 0 | -8.49 | -7.9  | 7.25 | -0.811 | -2.09 |
| chr14 | 74781367 | 74797921 | YLP1     | 2.00E-12 | + | 74781367 | 74797921 | 0 | 2 | 958,342,    | 0,16212      |   | -11.7 | -10.5 | 4.08 | -0.803 | -2.08 |
| chr12 | 1.22E+08 | 1.22E+08 | TMEM120I | 2.90E-07 | + | 1.22E+08 | 1.22E+08 | 0 | 1 | 101,        |              | 0 | -6.54 | -5.2  | 1.56 | -0.805 | -2.08 |
| chr16 | 72788352 | 72788901 | AC004943 | 3.20E-13 | + | 72788352 | 72788901 | 0 | 1 | 549,        |              | 0 | -12.5 | -11.1 | 9.86 | -0.803 | -2.08 |
| chr8  | 49912025 | 49912226 | SNTG1    | 7.40E-07 | + | 49912025 | 49912226 | 0 | 1 | 201,        |              | 0 | -6.13 | -4.84 | 3    | -0.8   | -2.07 |
| chr19 | 57506413 | 57506514 | ZNF773   | 5.60E-07 | + | 57506413 | 57506514 | 0 | 1 | 101,        |              | 0 | -6.25 | -4.95 | 1.7  | -0.799 | -2.07 |
| chr2  | 24825753 | 24826139 | AC012073 | 4.00E-06 | + | 24825753 | 24826139 | 0 | 1 | 386,        |              | 0 | -5.4  | -5.14 | 2.75 | -0.8   | -2.07 |
| chr6  | 1.09E+08 | 1.09E+08 | ABTB24   | 1.60E-09 | - | 1.09E+08 | 1.09E+08 | 0 | 1 | 647,        |              | 0 | -8.79 | -8.15 | 9    | -0.792 | -2.06 |
| chr20 | 5995281  | 5995432  | MCM8     | 5.50E-09 | + | 5995281  | 5995432  | 0 | 1 | 151,        |              | 0 | -8.26 | -7.7  | 3.39 | -0.794 | -2.06 |
| chr1  | 1.52E+08 | 1.52E+08 | FLG      | 0.002    | - | 1.52E+08 | 1.52E+08 | 0 | 1 | 101,        |              | 0 | -2.7  | -1.76 | 2    | -0.792 | -2.06 |
| chr2  | 96761799 | 96762398 | CNNM4    | 3.30E-09 | + | 96761799 | 96762398 | 0 | 1 | 599,        |              | 0 | -8.48 | -7.88 | 7.8  | -0.792 | -2.06 |
| chr1  | 1439753  | 1440449  | VWA1     | 1.50E-08 | + | 1439753  | 1440449  | 0 | 1 | 696,        |              | 0 | -7.82 | -7.31 | 3.35 | -0.794 | -2.06 |
| chr5  | 21473743 | 21473943 | GUSBP1   | 1.10E-05 | + | 21473743 | 21473943 | 0 | 1 | 200,        |              | 0 | -4.95 | -4.73 | 2.67 | -0.791 | -2.06 |
| chr1  | 1.51E+08 | 1.51E+08 | ZNF687   | 1.90E-08 | + | 1.51E+08 | 1.51E+08 | 0 | 1 | 1345,       |              | 0 | -7.72 | -7.22 | 7.39 | -0.783 | -2.05 |
| chr6  | 1.46E+08 | 1.46E+08 | SHPRH    | 2.00E-04 | - | 1.46E+08 | 1.46E+08 | 0 | 1 | 101,        |              | 0 | -3.69 | -2.67 | 1.6  | -0.787 | -2.05 |
| chr8  | 49911475 | 49911576 | SNTG1    | 7.40E-07 | + | 49911475 | 49911576 | 0 | 1 | 101,        |              | 0 | -6.13 | -4.84 | 2.6  | -0.789 | -2.05 |
| chr22 | 29441410 | 29470442 | RFPL1S   | 2.60E-06 | - | 29441410 | 29470442 | 0 | 2 | 719,178,    | 0,28854      |   | -5.59 | -4.36 | 8    | -0.784 | -2.05 |
| chr17 | 17796979 | 17798373 | RAI1     | 3.90E-07 | + | 17796979 | 17798373 | 0 | 1 | 1394,       |              | 0 | -6.41 | -6.06 | 7.67 | -0.779 | -2.04 |
| chr1  | 1.54E+08 | 1.54E+08 | ATP8B2   | 2.00E-12 | + | 1.54E+08 | 1.54E+08 | 0 | 1 | 549,        |              | 0 | -11.7 | -10.4 | 5.84 | -0.78  | -2.04 |
| chr3  | 1.96E+08 | 1.97E+08 | RNF168   | 3.10E-09 | - | 1.96E+08 | 1.97E+08 | 0 | 3 | 177,77,696, | 0,1205,15471 |   | -8.51 | -7.91 | 5.5  | -0.78  | -2.04 |
| chr5  | 1.79E+08 | 1.79E+08 | ZNF354A  | 7.90E-06 | - | 1.79E+08 | 1.79E+08 | 0 | 1 | 100,        |              | 0 | -5.1  | -4.86 | 3    | -0.78  | -2.04 |
| chr3  | 4313182  | 4313430  | SETMAR   | 4.20E-05 | + | 4313182  | 4313430  | 0 | 1 | 248,        |              | 0 | -4.38 | -3.3  | 2.25 | -0.783 | -2.04 |
| chrX  | 1.03E+08 | 1.03E+08 | TCEAL9   | 6.30E-12 | + | 1.03E+08 | 1.03E+08 | 0 | 1 | 247,        |              | 0 | -11.2 | -10.1 | 4    | -0.783 | -2.04 |
| chr20 | 25675112 | 25676161 | ZNF337-A | 4.10E-07 | + | 25675112 | 25676161 | 0 | 1 | 1049,       |              | 0 | -6.39 | -6.05 | 8.6  | -0.78  | -2.04 |
| chr19 | 52034768 | 52034919 | ZNF432   | 3.00E-05 | - | 52034768 | 52034919 | 0 | 1 | 151,        |              | 0 | -4.52 | -3.41 | 1.86 | -0.779 | -2.04 |
| chr15 | 66490184 | 66490382 | AC116913 | 2.80E-06 | - | 66490184 | 66490382 | 0 | 1 | 198,        |              | 0 | -5.55 | -4.33 | 1.75 | -0.78  | -2.04 |
| chr19 | 36749758 | 36750109 | ZNF850   | 7.90E-08 | - | 36749758 | 36750109 | 0 | 1 | 351,        |              | 0 | -7.1  | -5.69 | 4.33 | -0.78  | -2.04 |
| chr6  | 1.37E+08 | 1.37E+08 | IFNGR1   | 0.00021  | - | 1.37E+08 | 1.37E+08 | 0 | 1 | 448,        |              | 0 | -3.67 | -2.64 | 2.5  | -0.776 | -2.03 |
| chr8  | 1.16E+08 | 1.16E+08 | TRPS1    | 2.20E-09 | - | 1.16E+08 | 1.16E+08 | 0 | 2 | 745,802,    | 0,14874      |   | -8.66 | -8.04 | 10.3 | -0.775 | -2.03 |
| chr10 | 96057239 | 96058572 | CCNJ     | 2.80E-10 | + | 96057239 | 96058572 | 0 | 2 | 8,743,      | 0,590        |   | -9.56 | -8.78 | 6.88 | -0.779 | -2.03 |
| chr6  | 57148062 | 57150736 | ZNF451   | 6.30E-11 | + | 57148062 | 57150736 | 0 | 2 | 631,18,     | 0,2656       |   | -10.2 | -9.3  | 4.2  | -0.776 | -2.03 |
| chr1  | 86351522 | 86351873 | ODF2L    | 9.80E-10 | - | 86351522 | 86351873 | 0 | 1 | 351,        |              | 0 | -9.01 | -8.33 | 5.14 | -0.776 | -2.03 |
| chr6  | 17628900 | 17629350 | NUP153   | 1.80E-07 | - | 17628900 | 17629350 | 0 | 1 | 450,        |              | 0 | -6.75 | -6.37 | 3.24 | -0.778 | -2.03 |
| chr3  | 37326083 | 37326284 | GOLGA4   | 3.40E-07 | + | 37326083 | 37326284 | 0 | 1 | 201,        |              | 0 | -6.47 | -6.12 | 1.93 | -0.776 | -2.03 |

|       |          |          |          |          |   |          |          |   |   |          |         |       |       |      |        |       |
|-------|----------|----------|----------|----------|---|----------|----------|---|---|----------|---------|-------|-------|------|--------|-------|
| chr1  | 39388010 | 39388111 | MACF1    | 2.00E-08 | + | 39388010 | 39388111 | 0 | 1 | 101,     | 0       | -7.69 | -7.19 | 1.5  | -0.773 | -2.02 |
| chr21 | 31671329 | 31672322 | SCAF4    | 2.00E-11 | - | 31671329 | 31672322 | 0 | 1 | 993,     | 0       | -10.7 | -9.71 | 7.11 | -0.77  | -2.02 |
| chr8  | 61606982 | 61607233 | ASPH     | 0.00032  | - | 61606982 | 61607233 | 0 | 1 | 251,     | 0       | -3.49 | -3.33 | 3.53 | -0.773 | -2.02 |
| chr8  | 1.06E+08 | 1.06E+08 | AC027031 | 3.40E-08 | + | 1.06E+08 | 1.06E+08 | 0 | 1 | 785,     | 0       | -7.47 | -7.01 | 8.91 | -0.773 | -2.02 |
| chr8  | 1.44E+08 | 1.44E+08 | EPPK1    | 8.30E-06 | - | 1.44E+08 | 1.44E+08 | 0 | 1 | 101,     | 0       | -5.08 | -3.91 | 2.12 | -0.77  | -2.02 |
| chr6  | 16146711 | 16146812 | MYLIP    | 0.00014  | + | 16146711 | 16146812 | 0 | 1 | 101,     | 0       | -3.86 | -2.82 | 4.29 | -0.766 | -2.01 |
| chr1  | 2.04E+08 | 2.04E+08 | ZC3H11A  | 6.30E-11 | + | 2.04E+08 | 2.04E+08 | 0 | 1 | 701,     | 0       | -10.2 | -9.3  | 4.94 | -0.764 | -2.01 |
| chr10 | 97677570 | 97679704 | AVPI1    | 1.40E-09 | - | 97677570 | 97679704 | 0 | 2 | 455,86,  | 0,2048  | -8.86 | -8.21 | 7.14 | -0.766 | -2.01 |
| chr13 | 23339303 | 23339703 | SACS     | 0.00047  | - | 23339303 | 23339703 | 0 | 1 | 400,     | 0       | -3.33 | -3.19 | 3.89 | -0.764 | -2.01 |
| chr15 | 66490283 | 66490382 | SNAPC5   | 0.00083  | - | 66490283 | 66490382 | 0 | 1 | 99,      | 0       | -3.08 | -2.11 | 1.75 | -0.766 | -2.01 |
| chr12 | 57516780 | 57517168 | DDIT3    | 5.40E-07 | - | 57516780 | 57517168 | 0 | 1 | 388,     | 0       | -6.27 | -5.94 | 3.38 | -0.766 | -2.01 |
| chr22 | 29307676 | 29308274 | GAS2L1   | 0.00047  | + | 29307676 | 29308274 | 0 | 1 | 598,     | 0       | -3.33 | -3.18 | 5.57 | -0.768 | -2.01 |
| chr9  | 1.34E+08 | 1.34E+08 | RXRA     | 6.20E-07 | + | 1.34E+08 | 1.34E+08 | 0 | 1 | 200,     | 0       | -6.21 | -5.88 | 3.25 | -0.766 | -2.01 |
| chr6  | 1.61E+08 | 1.61E+08 | MAP3K4   | 7.90E-11 | + | 1.61E+08 | 1.61E+08 | 0 | 2 | 1295,1,  | 0,18514 | -10.1 | -9.24 | 10.9 | -0.761 | -2    |
| chr18 | 46679661 | 46679762 | ST8SIA5  | 0.00047  | - | 46679661 | 46679762 | 0 | 1 | 101,     | 0       | -3.33 | -2.34 | 2.75 | -0.758 | -2    |
| chr17 | 20238319 | 20238619 | SPECC1   | 0.00093  | + | 20238319 | 20238619 | 0 | 1 | 300,     | 0       | -3.03 | -2.89 | 7.83 | -0.76  | -2    |
| chr19 | 52324723 | 52325073 | ZNF480   | 0.0039   | + | 52324723 | 52325073 | 0 | 1 | 350,     | 0       | -2.41 | -2.29 | 8    | -0.764 | -2    |
| chr6  | 1.6E+08  | 1.6E+08  | SOD2     | 8.70E-06 | - | 1.6E+08  | 1.6E+08  | 0 | 2 | 82,18,   | 0,12442 | -5.06 | -3.89 | 2.11 | -0.758 | -2    |
| chr22 | 41177028 | 41179128 | EP300    | 6.30E-13 | + | 41177028 | 41179128 | 0 | 1 | 2100,    | 0       | -12.2 | -10.8 | 8.92 | -0.755 | -1.99 |
| chr15 | 25370578 | 25371575 | UBE3A    | 2.50E-11 | - | 25370578 | 25371575 | 0 | 1 | 997,     | 0       | -10.6 | -9.61 | 7.05 | -0.757 | -1.99 |
| chr1  | 2.13E+08 | 2.13E+08 | NSL1     | 2.50E-06 | - | 2.13E+08 | 2.13E+08 | 0 | 1 | 550,     | 0       | -5.61 | -5.33 | 7.62 | -0.753 | -1.99 |
| chr5  | 1.41E+08 | 1.41E+08 | WDR55    | 9.50E-05 | + | 1.41E+08 | 1.41E+08 | 0 | 1 | 151,     | 0       | -4.02 | -3.85 | 2.43 | -0.754 | -1.99 |
| chr13 | 1.11E+08 | 1.11E+08 | ING1     | 7.90E-16 | + | 1.11E+08 | 1.11E+08 | 0 | 1 | 800,     | 0       | -15.1 | -13.1 | 10.8 | -0.753 | -1.99 |
| chr17 | 39764852 | 39764952 | IKZF3    | 9.50E-05 | - | 39764852 | 39764952 | 0 | 1 | 100,     | 0       | -4.02 | -2.96 | 3    | -0.755 | -1.99 |
| chr3  | 1.83E+08 | 1.83E+08 | LAMP3    | 6.30E-06 | - | 1.83E+08 | 1.83E+08 | 0 | 1 | 399,     | 0       | -5.2  | -4.02 | 4    | -0.748 | -1.98 |
| chr17 | 48604613 | 48604912 | HOXB3    | 1.00E-06 | - | 48604613 | 48604912 | 0 | 1 | 299,     | 0       | -5.98 | -5.67 | 4.71 | -0.751 | -1.98 |
| chr6  | 3738088  | 3738884  | PXDC1    | 1.00E-06 | - | 3738088  | 3738884  | 0 | 2 | 60,89,   | 0,707   | -5.99 | -4.72 | 1.5  | -0.748 | -1.98 |
| chr14 | 45135979 | 45137107 | FANCM    | 1.80E-07 | + | 45135979 | 45137107 | 0 | 2 | 560,39,  | 0,1089  | -6.74 | -6.36 | 7.5  | -0.748 | -1.98 |
| chr4  | 1.25E+08 | 1.25E+08 | FAT4     | 0.00052  | + | 1.25E+08 | 1.25E+08 | 0 | 1 | 451,     | 0       | -3.28 | -2.29 | 4.25 | -0.748 | -1.98 |
| chr19 | 39473975 | 39474337 | SUPT5H   | 2.20E-07 | + | 39473975 | 39474337 | 0 | 2 | 146,104, | 0,258   | -6.65 | -6.28 | 1.68 | -0.751 | -1.98 |
| chr3  | 53292235 | 53292385 | DCP1A    | 7.90E-07 | - | 53292235 | 53292385 | 0 | 1 | 150,     | 0       | -6.1  | -5.79 | 2.08 | -0.748 | -1.98 |
| chr21 | 10328510 | 10336959 | AP003900 | 1.00E-10 | - | 10328510 | 10336959 | 0 | 2 | 528,71,  | 0,8378  | -9.99 | -9.12 | 10   | -0.752 | -1.98 |
| chr11 | 1.18E+08 | 1.18E+08 | AP001267 | 3.00E-09 | + | 1.18E+08 | 1.18E+08 | 0 | 1 | 101,     | 0       | -8.53 | -7.93 | 1.84 | -0.748 | -1.98 |
| chr20 | 32436523 | 32437273 | ASXL1    | 2.50E-12 | + | 32436523 | 32437273 | 0 | 1 | 750,     | 0       | -11.6 | -10.4 | 6.03 | -0.744 | -1.97 |
| chr20 | 36049927 | 36050919 | NORAD    | 5.00E-15 | - | 36049927 | 36050919 | 0 | 1 | 992,     | 0       | -14.3 | -12.5 | 5.75 | -0.742 | -1.97 |
| chr4  | 1.87E+08 | 1.87E+08 | FAT1     | 0.00027  | - | 1.87E+08 | 1.87E+08 | 0 | 1 | 400,     | 0       | -3.57 | -3.41 | 4.29 | -0.737 | -1.96 |
| chr6  | 349409   | 349610   | DTSP22   | 4.30E-06 | + | 349409   | 349610   | 0 | 1 | 201,     | 0       | -5.37 | -5.11 | 1.45 | -0.736 | -1.96 |
| chr9  | 5467843  | 5468191  | CD274    | 6.00E-06 | + | 5467843  | 5468191  | 0 | 1 | 348,     | 0       | -5.22 | -4.98 | 8.62 | -0.74  | -1.96 |
| chr3  | 20174398 | 20175048 | SGO1     | 5.90E-06 | - | 20174398 | 20175048 | 0 | 1 | 650,     | 0       | -5.23 | -4.99 | 6.17 | -0.736 | -1.96 |
| chr16 | 53825945 | 53826446 | FTO      | 5.90E-08 | + | 53825945 | 53826446 | 0 | 1 | 501,     | 0       | -7.23 | -6.8  | 5.87 | -0.736 | -1.96 |
| chr8  | 1.23E+08 | 1.23E+08 | ZHX1     | 4.60E-09 | - | 1.23E+08 | 1.23E+08 | 0 | 1 | 151,     | 0       | -8.34 | -7.76 | 2.64 | -0.736 | -1.96 |
| chr16 | 66510740 | 66511139 | TK2      | 3.90E-05 | - | 66510740 | 66511139 | 0 | 1 | 399,     | 0       | -4.41 | -4.21 | 6.25 | -0.738 | -1.96 |
| chr16 | 31061089 | 31061337 | ZNF668   | 8.90E-06 | - | 31061089 | 31061337 | 0 | 1 | 248,     | 0       | -5.05 | -4.81 | 1.86 | -0.736 | -1.96 |
| chr1  | 2.04E+08 | 2.04E+08 | ZBED6    | 1.60E-10 | + | 2.04E+08 | 2.04E+08 | 0 | 1 | 700,     | 0       | -9.79 | -8.96 | 4.43 | -0.736 | -1.96 |
| chr7  | 75042373 | 75042823 | RCC1L    | 5.50E-08 | - | 75042373 | 75042823 | 0 | 1 | 450,     | 0       | -7.26 | -6.82 | 2.42 | -0.738 | -1.96 |
| chr3  | 38413285 | 38413485 | XYLB     | 0.00021  | + | 38413285 | 38413485 | 0 | 1 | 200,     | 0       | -3.67 | -3.52 | 5.2  | -0.735 | -1.95 |
| chr7  | 1.57E+08 | 1.57E+08 | NOM1     | 3.40E-07 | + | 1.57E+08 | 1.57E+08 | 0 | 1 | 251,     | 0       | -6.47 | -6.12 | 7.7  | -0.736 | -1.95 |
| chr4  | 1.84E+08 | 1.84E+08 | STOX2    | 2.20E-05 | + | 1.84E+08 | 1.84E+08 | 0 | 2 | 284,16,  | 0,53586 | -4.66 | -4.45 | 5.5  | -0.732 | -1.95 |
| chr3  | 47123926 | 47124227 | SETD2    | 2.60E-06 | - | 47123926 | 47124227 | 0 | 1 | 301,     | 0       | -5.59 | -5.31 | 2.41 | -0.736 | -1.95 |
| chr4  | 441552   | 442301   | ZNF721   | 0.00018  | - | 441552   | 442301   | 0 | 1 | 749,     | 0       | -3.75 | -3.59 | 4.67 | -0.729 | -1.95 |
| chr12 | 1E+08    | 1E+08    | UHRF1BP1 | 2.20E-09 | - | 1E+08    | 1E+08    | 0 | 1 | 451,     | 0       | -8.65 | -8.03 | 3.63 | -0.724 | -1.94 |

|       |          |          |           |          |   |          |          |   |   |                           |               |       |       |      |        |       |
|-------|----------|----------|-----------|----------|---|----------|----------|---|---|---------------------------|---------------|-------|-------|------|--------|-------|
| chr6  | 1.44E+08 | 1.44E+08 | PHACTR2   | 5.10E-05 | + | 1.44E+08 | 1.44E+08 | 0 | 1 | 101,                      | 0             | -4.29 | -4.1  | 2.38 | -0.727 | -1.94 |
| chr4  | 1.23E+08 | 1.23E+08 | SPRY1     | 1.60E-10 | + | 1.23E+08 | 1.23E+08 | 0 | 1 | 1041,                     | 0             | -9.79 | -8.96 | 3.69 | -0.724 | -1.94 |
| chr19 | 681453   | 681603   | FSTL3     | 2.00E-04 | + | 681453   | 681603   | 0 | 1 | 150,                      | 0             | -3.7  | -3.54 | 2.04 | -0.723 | -1.93 |
| chr6  | 70486207 | 70502699 | FAM135A   | 3.80E-09 | + | 70486207 | 70502699 | 0 | 3 | 37,50,64,                 | 0,4826,16428  | -8.42 | -7.83 | 2.17 | -0.722 | -1.93 |
| chr22 | 26490117 | 26490792 | SRRD      | 5.00E-06 | + | 26490117 | 26490792 | 0 | 2 | 81,20,                    | 0,655         | -5.3  | -5.05 | 2.68 | -0.722 | -1.93 |
| chr5  | 1.76E+08 | 1.76E+08 | KIAA1191  | 5.50E-05 | - | 1.76E+08 | 1.76E+08 | 0 | 2 | 164,35,                   | 0,276         | -4.26 | -4.07 | 1.7  | -0.722 | -1.93 |
| chr20 | 25675175 | 25676167 | ZNF337    | 7.90E-08 | - | 25675175 | 25676167 | 0 | 1 | 992,                      | 0             | -7.1  | -6.68 | 9.73 | -0.723 | -1.93 |
| chr4  | 48488642 | 48488889 | SLC10A4   | 4.70E-05 | + | 48488642 | 48488889 | 0 | 1 | 247,                      | 0             | -4.33 | -3.24 | 3.17 | -0.723 | -1.93 |
| chr1  | 1.61E+08 | 1.61E+08 | NIT1      | 1.80E-05 | + | 1.61E+08 | 1.61E+08 | 0 | 1 | 300,                      | 0             | -4.74 | -4.53 | 1.84 | -0.723 | -1.93 |
| chr3  | 1.84E+08 | 1.84E+08 | YEATS2    | 1.50E-07 | + | 1.84E+08 | 1.84E+08 | 0 | 1 | 400,                      | 0             | -6.82 | -6.43 | 3.16 | -0.722 | -1.93 |
| chr5  | 1.79E+08 | 1.79E+08 | ZNF354B   | 1.70E-08 | + | 1.79E+08 | 1.79E+08 | 0 | 1 | 799,                      | 0             | -7.78 | -7.28 | 5.78 | -0.721 | -1.93 |
| chr18 | 244818   | 245068   | THOC1     | 1.20E-07 | - | 244818   | 245068   | 0 | 1 | 250,                      | 0             | -6.91 | -5.52 | 3.75 | -0.712 | -1.92 |
| chr17 | 82243231 | 82243382 | CSNK1D    | 5.20E-05 | - | 82243231 | 82243382 | 0 | 1 | 151,                      | 0             | -4.28 | -3.2  | 3.43 | -0.719 | -1.92 |
| chr12 | 1.13E+08 | 1.13E+08 | PLBD2     | 0.0015   | + | 1.13E+08 | 1.13E+08 | 0 | 1 | 100,                      | 0             | -2.81 | -2.68 | 2.27 | -0.719 | -1.92 |
| chr19 | 42232123 | 42232569 | GSK3A     | 8.90E-07 | - | 42232123 | 42232569 | 0 | 2 | 26,74,                    | 0,372         | -6.05 | -5.74 | 1.37 | -0.705 | -1.91 |
| chr18 | 79971259 | 79971459 | TXNL4A    | 3.10E-05 | - | 79971259 | 79971459 | 0 | 1 | 200,                      | 0             | -4.51 | -3.41 | 3.33 | -0.707 | -1.91 |
| chr1  | 89592836 | 89593136 | LRRRC8B   | 1.30E-09 | + | 89592836 | 89593136 | 0 | 1 | 300,                      | 0             | -8.88 | -8.22 | 10   | -0.709 | -1.91 |
| chr19 | 56422954 | 56423701 | ZNF583    | 5.00E-08 | + | 56422954 | 56423701 | 0 | 1 | 747,                      | 0             | -7.3  | -5.85 | 5    | -0.705 | -1.91 |
| chr6  | 75253864 | 75254261 | ZNF30A    | 2.50E-08 | - | 75253864 | 75254261 | 0 | 1 | 397,                      | 0             | -7.6  | -7.12 | 4.77 | -0.703 | -1.9  |
| chr5  | 1.41E+08 | 1.41E+08 | WDR55     | 9.50E-05 | + | 1.41E+08 | 1.41E+08 | 0 | 1 | 150,                      | 0             | -4.02 | -2.97 | 2.12 | -0.699 | -1.9  |
| chr7  | 91873385 | 91876946 | MTERF1    | 3.50E-10 | - | 91873385 | 91876946 | 0 | 2 | 1379,69,                  | 0,3492        | -9.45 | -8.69 | 8    | -0.703 | -1.9  |
| chr21 | 34517718 | 34521169 | RCAN1     | 1.00E-11 | - | 34517718 | 34521169 | 0 | 2 | 538,110,                  | 0,3341        | -11   | -9.9  | 8    | -0.702 | -1.9  |
| chr10 | 96956335 | 96956486 | LCOR      | 2.20E-08 | + | 96956335 | 96956486 | 0 | 1 | 151,                      | 0             | -7.65 | -6.15 | 2.5  | -0.704 | -1.9  |
| chr16 | 69335184 | 69335279 | ACO26464  | 0.00032  | - | 69335184 | 69335279 | 0 | 1 | 95,                       | 0             | -3.5  | -3.35 | 2.59 | -0.699 | -1.9  |
| chr20 | 63699787 | 63700038 | ADFRP1    | 6.50E-05 | - | 63699787 | 63700038 | 0 | 1 | 251,                      | 0             | -4.19 | -4.01 | 3.21 | -0.695 | -1.89 |
| chr15 | 43405432 | 43405582 | TUBGCP4   | 0.00018  | + | 43405432 | 43405582 | 0 | 1 | 150,                      | 0             | -3.75 | -3.59 | 3.21 | -0.695 | -1.89 |
| chr14 | 32545701 | 32545852 | AKAP6     | 0.00039  | + | 32545701 | 32545852 | 0 | 1 | 151,                      | 0             | -3.41 | -2.41 | 2.4  | -0.698 | -1.89 |
| chr3  | 84960207 | 84960358 | CADM2     | 1.00E-07 | + | 84960207 | 84960358 | 0 | 1 | 151,                      | 0             | -7    | -6.59 | 3.38 | -0.694 | -1.89 |
| chr2  | 17783703 | 17784303 | GEN1      | 2.00E-06 | + | 17783703 | 17784303 | 0 | 1 | 600,                      | 0             | -5.69 | -5.41 | 13.3 | -0.696 | -1.89 |
| chr14 | 74921750 | 74922354 | RPS6KL1   | 9.10E-06 | - | 74921750 | 74922354 | 0 | 2 | 23,377,                   | 0,227         | -5.04 | -4.8  | 4.67 | -0.698 | -1.89 |
| chr6  | 57147939 | 57150529 | ZNF451-A  | 3.20E-09 | - | 57147939 | 57150529 | 0 | 2 | 332,16,                   | 0,2574        | -8.5  | -7.9  | 2.9  | -0.695 | -1.89 |
| chr14 | 1.03E+08 | 1.03E+08 | AL117209  | 1.30E-12 | + | 1.03E+08 | 1.03E+08 | 0 | 1 | 245,                      | 0             | -11.9 | -10.6 | 3.89 | -0.695 | -1.89 |
| chr1  | 10639599 | 10640000 | CASZ1     | 7.90E-06 | - | 10639599 | 10640000 | 0 | 1 | 401,                      | 0             | -5.1  | -4.86 | 5.25 | -0.689 | -1.88 |
| chr19 | 48750106 | 48750257 | FUT1      | 0.00032  | - | 48750106 | 48750257 | 0 | 1 | 151,                      | 0             | -3.49 | -2.48 | 2.6  | -0.692 | -1.88 |
| chr10 | 21514777 | 21517027 | SKIDA1    | 2.60E-09 | - | 21514777 | 21517027 | 0 | 1 | 2250,                     | 0             | -8.59 | -7.98 | 7.57 | -0.693 | -1.88 |
| chr11 | 1.19E+08 | 1.19E+08 | BCL9L     | 1.00E-11 | - | 1.19E+08 | 1.19E+08 | 0 | 2 | 240,110,                  | 0,1498        | -11   | -9.9  | 2.7  | -0.693 | -1.88 |
| chr17 | 17793843 | 17794043 | RAI1      | 5.00E-06 | + | 17793843 | 17794043 | 0 | 1 | 200,                      | 0             | -5.3  | -5.05 | 2.64 | -0.685 | -1.87 |
| chr20 | 49246406 | 49246707 | ZNFX1     | 0.00025  | - | 49246406 | 49246707 | 0 | 1 | 301,                      | 0             | -3.61 | -3.45 | 2.79 | -0.687 | -1.87 |
| chr19 | 21098851 | 21117225 | ZNF714    | 4.90E-09 | + | 21098851 | 21117225 | 0 | 3 | 59,22,419,                | 0,10771,17951 | -8.31 | -7.74 | 8.08 | -0.686 | -1.87 |
| chr16 | 88715296 | 88715396 | CTU2      | 0.00046  | + | 88715296 | 88715396 | 0 | 1 | 100,                      | 0             | -3.34 | -2.35 | 1.75 | -0.683 | -1.87 |
| chr9  | 97854885 | 97855281 | FOXE1     | 1.10E-05 | + | 97854885 | 97855281 | 0 | 1 | 396,                      | 0             | -4.94 | -4.71 | 9.75 | -0.682 | -1.87 |
| chr11 | 1.02E+08 | 1.02E+08 | BIRC3     | 4.50E-05 | + | 1.02E+08 | 1.02E+08 | 0 | 1 | 101,                      | 0             | -4.35 | -3.26 | 1.83 | -0.676 | -1.86 |
| chr1  | 92394106 | 92394407 | RPAP2     | 3.80E-06 | + | 92394106 | 92394407 | 0 | 1 | 301,                      | 0             | -5.42 | -4.21 | 2    | -0.676 | -1.86 |
| chr15 | 78766068 | 78766417 | ADAMTS7   | 3.40E-06 | - | 78766068 | 78766417 | 0 | 1 | 349,                      | 0             | -5.47 | -5.21 | 5.33 | -0.679 | -1.86 |
| chr8  | 70113067 | 70113218 | NCOA2     | 1.90E-06 | - | 70113067 | 70113218 | 0 | 1 | 151,                      | 0             | -5.72 | -5.44 | 5.4  | -0.679 | -1.86 |
| chr16 | 28834619 | 28834877 | ATXN2L    | 6.30E-11 | + | 28834619 | 28834877 | 0 | 2 | 74,26,                    | 0,232         | -10.2 | -9.27 | 1.22 | -0.677 | -1.86 |
| chr1  | 843456   | 843557   | LINC0112E | 0.00059  | + | 843456   | 843557   | 0 | 1 | 101,                      | 0             | -3.23 | -2.25 | 2.5  | -0.679 | -1.86 |
| chr1  | 1314036  | 1314734  | INTS11    | 3.00E-06 | - | 1314036  | 1314734  | 0 | 1 | 698,                      | 0             | -5.53 | -5.26 | 15.5 | -0.675 | -1.85 |
| chr15 | 43361163 | 43363819 | ZSCAN29   | 3.00E-10 | - | 43361163 | 43363819 | 0 | 2 | 778,71,                   | 0,2585        | -9.52 | -8.74 | 11.3 | -0.671 | -1.85 |
| chr8  | 43199411 | 43199911 | HGSNAT    | 4.40E-10 | + | 43199411 | 43199911 | 0 | 1 | 500,                      | 0             | -9.36 | -8.61 | 12.7 | -0.676 | -1.85 |
| chr12 | 1.24E+08 | 1.24E+08 | NCOR2     | 4.00E-12 | - | 1.24E+08 | 1.24E+08 | 0 | 4 | 105,589,51,50,8327,10718, |               | -11.4 | -10.2 | 2.83 | -0.676 | -1.85 |

|       |          |          |           |          |   |          |          |   |   |          |         |       |       |      |        |       |
|-------|----------|----------|-----------|----------|---|----------|----------|---|---|----------|---------|-------|-------|------|--------|-------|
| chr11 | 1.18E+08 | 1.18E+08 | KMT2A     | 1.90E-08 | + | 1.18E+08 | 1.18E+08 | 0 | 1 | 100,     | 0       | -7.72 | -7.23 | 1.61 | -0.667 | -1.84 |
| chr12 | 43755093 | 43758367 | PUS7L     | 1.20E-10 | - | 43755093 | 43758367 | 0 | 2 | 168,82,  | 0,3192  | -9.92 | -9.07 | 2.86 | -0.666 | -1.84 |
| chr13 | 45336805 | 45337354 | TPT1      | 1.00E-11 | - | 45336805 | 45337354 | 0 | 1 | 549,     | 0       | -11   | -9.9  | 3.6  | -0.668 | -1.84 |
| chr15 | 70668667 | 70671044 | UACA      | 2.00E-11 | - | 70668667 | 70671044 | 0 | 2 | 795,6,   | 0,2371  | -10.7 | -9.68 | 4.5  | -0.664 | -1.84 |
| chr12 | 89348916 | 89351031 | DUSP6     | 2.00E-09 | - | 89348916 | 89351031 | 0 | 2 | 645,444, | 0,1671  | -8.69 | -8.06 | 5.81 | -0.668 | -1.84 |
| chr6  | 56540408 | 56540759 | DST       | 3.00E-07 | - | 56540408 | 56540759 | 0 | 1 | 351,     | 0       | -6.53 | -5.19 | 4.33 | -0.667 | -1.84 |
| chr5  | 1293043  | 1293843  | TERT      | 1.50E-06 | - | 1293043  | 1293843  | 0 | 1 | 800,     | 0       | -5.81 | -5.52 | 4.86 | -0.668 | -1.84 |
| chr15 | 85580267 | 85581068 | AKAP13    | 3.20E-07 | + | 85580267 | 85581068 | 0 | 1 | 801,     | 0       | -6.5  | -6.15 | 4.21 | -0.664 | -1.84 |
| chr16 | 30443777 | 30445593 | SEPHS2    | 6.60E-09 | - | 30443777 | 30445593 | 0 | 1 | 1816,    | 0       | -8.18 | -7.63 | 5.76 | -0.668 | -1.84 |
| chr1  | 2.07E+08 | 2.07E+08 | YOD1      | 6.30E-12 | - | 2.07E+08 | 2.07E+08 | 0 | 1 | 1245,    | 0       | -11.2 | -10.1 | 7.21 | -0.667 | -1.84 |
| chr21 | 45468352 | 45468652 | COL18A1   | 4.80E-05 | + | 45468352 | 45468652 | 0 | 1 | 300,     | 0       | -4.32 | -4.13 | 3.29 | -0.665 | -1.84 |
| chr19 | 11616785 | 11618518 | XNF627    | 1.90E-10 | + | 11616785 | 11618518 | 0 | 1 | 1733,    | 0       | -9.73 | -8.92 | 9.09 | -0.668 | -1.84 |
| chr4  | 4585873  | 4586074  | STX18-AS1 | 4.70E-07 | + | 4585873  | 4586074  | 0 | 1 | 201,     | 0       | -6.33 | -6    | 5.67 | -0.668 | -1.84 |
| chr17 | 63704429 | 63704529 | STRADA    | 1.80E-05 | - | 63704429 | 63704529 | 0 | 1 | 100,     | 0       | -4.74 | -4.53 | 1.57 | -0.666 | -1.84 |
| chr22 | 39224941 | 39225091 | PDGFB     | 0.0016   | - | 39224941 | 39225091 | 0 | 1 | 150,     | 0       | -2.79 | -1.84 | 2.67 | -0.663 | -1.83 |
| chr2  | 1.77E+08 | 1.77E+08 | NFE2L2    | 1.30E-10 | - | 1.77E+08 | 1.77E+08 | 0 | 1 | 1045,    | 0       | -9.9  | -9.05 | 5.87 | -0.663 | -1.83 |
| chr22 | 37029473 | 37029723 | MPST      | 5.90E-10 | + | 37029473 | 37029723 | 0 | 1 | 250,     | 0       | -9.23 | -8.51 | 2.91 | -0.664 | -1.83 |
| chr2  | 1.11E+08 | 1.11E+08 | MIR4435-2 | 2.00E-05 | - | 1.11E+08 | 1.11E+08 | 0 | 1 | 101,     | 0       | -4.69 | -3.56 | 2.57 | -0.663 | -1.83 |
| chr7  | 1.09E+08 | 1.09E+08 | THAP5     | 1.90E-09 | - | 1.09E+08 | 1.09E+08 | 0 | 1 | 1042,    | 0       | -8.73 | -8.09 | 12   | -0.663 | -1.83 |
| chr1  | 2.35E+08 | 2.35E+08 | AL160408  | 6.30E-09 | + | 2.35E+08 | 2.35E+08 | 0 | 2 | 531,63,  | 0,2314  | -8.2  | -7.65 | 10.3 | -0.664 | -1.83 |
| chr18 | 36199836 | 36199936 | MOCOS     | 1.10E-07 | + | 36199836 | 36199936 | 0 | 1 | 100,     | 0       | -6.95 | -5.56 | 2.5  | -0.657 | -1.82 |
| chr9  | 78329161 | 78329407 | PSAT1     | 6.00E-08 | + | 78329161 | 78329407 | 0 | 1 | 246,     | 0       | -7.22 | -6.79 | 2.06 | -0.659 | -1.82 |
| chr13 | 72746596 | 72747046 | BORA      | 2.70E-10 | + | 72746596 | 72747046 | 0 | 1 | 450,     | 0       | -9.57 | -8.78 | 5.37 | -0.658 | -1.82 |
| chr7  | 91266501 | 91267099 | FZD1      | 1.00E-12 | + | 91266501 | 91267099 | 0 | 1 | 598,     | 0       | -12   | -10.7 | 8    | -0.66  | -1.82 |
| chr3  | 1.38E+08 | 1.38E+08 | MRAS      | 6.30E-05 | + | 1.38E+08 | 1.38E+08 | 0 | 1 | 448,     | 0       | -4.2  | -4.02 | 6.6  | -0.66  | -1.82 |
| chr11 | 1.24E+08 | 1.24E+08 | ZNF202    | 1.20E-07 | - | 1.24E+08 | 1.24E+08 | 0 | 2 | 990,5,   | 0,1474  | -6.91 | -6.52 | 6    | -0.658 | -1.82 |
| chr2  | 1.11E+08 | 1.11E+08 | MIR4435-2 | 2.00E-05 | - | 1.11E+08 | 1.11E+08 | 0 | 2 | 72,79,   | 0,61805 | -4.69 | -3.56 | 9.5  | -0.658 | -1.82 |
| chr14 | 74909721 | 74910120 | RPS6KL1   | 3.20E-06 | - | 74909721 | 74910120 | 0 | 1 | 399,     | 0       | -5.49 | -5.22 | 5.14 | -0.66  | -1.82 |
| chr9  | 96758700 | 96760044 | ZNF510    | 1.00E-10 | - | 96758700 | 96760044 | 0 | 1 | 1344,    | 0       | -10   | -9.13 | 5.8  | -0.656 | -1.81 |
| chr10 | 1.26E+08 | 1.26E+08 | BCCIP     | 5.00E-08 | + | 1.26E+08 | 1.26E+08 | 0 | 1 | 950,     | 0       | -7.3  | -6.86 | 6.17 | -0.653 | -1.81 |
| chr5  | 1.46E+08 | 1.46E+08 | TCERG1    | 6.30E-11 | + | 1.46E+08 | 1.46E+08 | 0 | 2 | 85,16,   | 0,2765  | -10.2 | -9.31 | 1.37 | -0.655 | -1.81 |
| chr2  | 1.99E+08 | 1.99E+08 | SATB2     | 0.00019  | - | 1.99E+08 | 1.99E+08 | 0 | 1 | 101,     | 0       | -3.73 | -2.71 | 1.67 | -0.653 | -1.81 |
| chr14 | 74019398 | 74022929 | BBOF1     | 1.90E-06 | + | 74019398 | 74022929 | 0 | 2 | 136,14,  | 0,3517  | -5.72 | -4.48 | 2.64 | -0.653 | -1.81 |
| chr20 | 47642334 | 47647272 | NCOA3     | 2.10E-08 | + | 47642334 | 47647272 | 0 | 2 | 50,200,  | 0,4738  | -7.67 | -7.18 | 3.93 | -0.653 | -1.81 |
| chr3  | 15251366 | 15251517 | CAPN7     | 4.20E-06 | + | 15251366 | 15251517 | 0 | 1 | 151,     | 0       | -5.38 | -4.19 | 2    | -0.655 | -1.81 |
| chr2  | 1.31E+08 | 1.31E+08 | ARHGEF4   | 0.00021  | + | 1.31E+08 | 1.31E+08 | 0 | 1 | 449,     | 0       | -3.67 | -3.51 | 5.13 | -0.655 | -1.81 |
| chr4  | 1.53E+08 | 1.53E+08 | FHDC1     | 6.30E-06 | + | 1.53E+08 | 1.53E+08 | 0 | 1 | 151,     | 0       | -5.2  | -4.02 | 4.6  | -0.654 | -1.81 |
| chr10 | 73813298 | 73813398 | CAMK2G    | 1.20E-05 | - | 73813298 | 73813398 | 0 | 1 | 100,     | 0       | -4.93 | -3.79 | 1.62 | -0.653 | -1.81 |
| chr16 | 29698201 | 29698450 | QPRT      | 2.50E-13 | + | 29698201 | 29698450 | 0 | 1 | 249,     | 0       | -12.6 | -11.1 | 1.57 | -0.652 | -1.8  |
| chr8  | 98942577 | 98942827 | STK3      | 2.20E-05 | - | 98942577 | 98942827 | 0 | 1 | 250,     | 0       | -4.66 | -3.54 | 5.2  | -0.649 | -1.8  |
| chr22 | 39045103 | 39045452 | APOBEC3F  | 7.40E-08 | + | 39045103 | 39045452 | 0 | 1 | 349,     | 0       | -7.13 | -6.71 | 4.25 | -0.649 | -1.8  |
| chr9  | 1.14E+08 | 1.14E+08 | RGS3      | 4.00E-13 | + | 1.14E+08 | 1.14E+08 | 0 | 2 | 935,465, | 0,7840  | -12.4 | -11   | 5.71 | -0.649 | -1.8  |
| chr21 | 46112358 | 46112509 | COL6A2    | 0.0013   | + | 46112358 | 46112509 | 0 | 1 | 151,     | 0       | -2.88 | -2.75 | 1.94 | -0.652 | -1.8  |
| chrX  | 30854540 | 30855389 | TAB3      | 9.30E-09 | - | 30854540 | 30855389 | 0 | 1 | 849,     | 0       | -8.03 | -7.5  | 5.33 | -0.652 | -1.8  |
| chr21 | 34887507 | 34887608 | RUNX1     | 1.00E-04 | - | 34887507 | 34887608 | 0 | 1 | 101,     | 0       | -3.99 | -2.94 | 6.25 | -0.649 | -1.8  |
| chr1  | 39625422 | 39626268 | HEYL      | 3.70E-06 | - | 39625422 | 39626268 | 0 | 1 | 846,     | 0       | -5.43 | -5.17 | 11.3 | -0.651 | -1.8  |
| chr1  | 10639589 | 10639988 | AL139423  | 3.20E-06 | + | 10639589 | 10639988 | 0 | 1 | 399,     | 0       | -5.49 | -5.22 | 4.5  | -0.651 | -1.8  |
| chr4  | 5813755  | 5814255  | EVC       | 2.50E-11 | + | 5813755  | 5814255  | 0 | 1 | 500,     | 0       | -10.6 | -9.6  | 8.83 | -0.644 | -1.79 |
| chr16 | 67908746 | 67909197 | PSKH1     | 8.70E-06 | + | 67908746 | 67909197 | 0 | 1 | 451,     | 0       | -5.06 | -4.82 | 5.07 | -0.643 | -1.79 |
| chr1  | 2184610  | 2185258  | FAAP20    | 3.90E-08 | - | 2184610  | 2185258  | 0 | 1 | 648,     | 0       | -7.41 | -6.95 | 4.5  | -0.646 | -1.79 |
| chr17 | 2057222  | 2057472  | HIC1      | 5.80E-07 | + | 2057222  | 2057472  | 0 | 1 | 250,     | 0       | -6.24 | -5.91 | 6.83 | -0.648 | -1.79 |

|       |          |          |           |          |   |          |          |   |   |              |               |       |       |      |        |       |
|-------|----------|----------|-----------|----------|---|----------|----------|---|---|--------------|---------------|-------|-------|------|--------|-------|
| chr1  | 2.47E+08 | 2.47E+08 | AL390728. | 1.00E-07 | - | 2.47E+08 | 2.47E+08 | 0 | 1 | 933,         | 0             | -6.98 | -6.57 | 5.75 | -0.644 | -1.79 |
| chr16 | 2339249  | 2340989  | ABCA17P   | 0.00013  | + | 2339249  | 2340989  | 0 | 2 | 82,68,       | 0,1672        | -3.88 | -2.84 | 2.6  | -0.647 | -1.79 |
| chr5  | 1.41E+08 | 1.41E+08 | PCDHGC3   | 0.0032   | + | 1.41E+08 | 1.41E+08 | 0 | 1 | 598,         | 0             | -2.5  | -2.38 | 8.2  | -0.647 | -1.79 |
| chr19 | 55045025 | 55047445 | ACO11476  | 8.30E-08 | - | 55045025 | 55047445 | 0 | 2 | 284,59,      | 0,2361        | -7.08 | -6.67 | 3.18 | -0.645 | -1.79 |
| chr6  | 35321522 | 35321622 | DEF6      | 0.00078  | + | 35321522 | 35321622 | 0 | 1 | 100,         | 0             | -3.11 | -2.13 | 2.64 | -0.639 | -1.78 |
| chr2  | 1.82E+08 | 1.82E+08 | ITPRID2   | 1.00E-07 | + | 1.82E+08 | 1.82E+08 | 0 | 1 | 550,         | 0             | -6.99 | -6.59 | 4.43 | -0.639 | -1.78 |
| chr17 | 82243680 | 82244230 | CSNK1D    | 4.60E-06 | - | 82243680 | 82244230 | 0 | 1 | 550,         | 0             | -5.34 | -5.09 | 2.95 | -0.64  | -1.78 |
| chr8  | 38847987 | 38848087 | TACC1     | 5.50E-05 | + | 38847987 | 38848087 | 0 | 1 | 100,         | 0             | -4.26 | -4.08 | 2.5  | -0.639 | -1.78 |
| chr1  | 58681928 | 58682527 | MYSM1     | 3.50E-10 | - | 58681928 | 58682527 | 0 | 1 | 599,         | 0             | -9.46 | -8.69 | 6.86 | -0.641 | -1.78 |
| chr19 | 36747758 | 36748559 | ZNF850    | 7.90E-08 | - | 36747758 | 36748559 | 0 | 1 | 801,         | 0             | -7.1  | -6.68 | 5.33 | -0.639 | -1.78 |
| chr6  | 1.11E+08 | 1.11E+08 | REV3L     | 4.50E-06 | - | 1.11E+08 | 1.11E+08 | 0 | 1 | 649,         | 0             | -5.35 | -5.09 | 4.4  | -0.639 | -1.77 |
| chr20 | 2483513  | 2484512  | ZNF343    | 3.20E-09 | - | 2483513  | 2484512  | 0 | 1 | 999,         | 0             | -8.5  | -7.9  | 6.12 | -0.637 | -1.77 |
| chr22 | 40264979 | 40266679 | TNRC6B    | 1.60E-13 | + | 40264979 | 40266679 | 0 | 1 | 1700,        | 0             | -12.8 | -11.3 | 9.36 | -0.637 | -1.77 |
| chr1  | 78650423 | 78650623 | IFI44     | 5.20E-05 | + | 78650423 | 78650623 | 0 | 1 | 200,         | 0             | -4.28 | -3.2  | 4.5  | -0.638 | -1.77 |
| chr13 | 23338854 | 23339155 | SACS      | 0.00034  | - | 23338854 | 23339155 | 0 | 1 | 301,         | 0             | -3.47 | -3.32 | 3.89 | -0.632 | -1.77 |
| chr6  | 56555422 | 56555773 | DST       | 2.20E-06 | - | 56555422 | 56555773 | 0 | 1 | 351,         | 0             | -5.66 | -5.38 | 10.2 | -0.636 | -1.77 |
| chr4  | 1.19E+08 | 1.19E+08 | SYNPO2    | 2.60E-06 | + | 1.19E+08 | 1.19E+08 | 0 | 1 | 251,         | 0             | -5.59 | -4.37 | 2.29 | -0.639 | -1.77 |
| chr4  | 80203381 | 80203681 | PRDM8     | 5.00E-08 | + | 80203381 | 80203681 | 0 | 1 | 300,         | 0             | -7.3  | -6.86 | 5.25 | -0.629 | -1.76 |
| chr3  | 1.85E+08 | 1.85E+08 | TMEM41A   | 2.50E-07 | - | 1.85E+08 | 1.85E+08 | 0 | 1 | 250,         | 0             | -6.6  | -6.23 | 4    | -0.629 | -1.76 |
| chr3  | 9829128  | 9835302  | ARPC4-TT  | 4.20E-08 | + | 9829128  | 9835302  | 0 | 2 | 267,622,     | 0,5552        | -7.38 | -6.93 | 4.42 | -0.626 | -1.76 |
| chr20 | 32316224 | 32316531 | KIF3B     | 3.00E-08 | + | 32316224 | 32316531 | 0 | 2 | 95,5,        | 0,302         | -7.52 | -7.05 | 1.32 | -0.621 | -1.75 |
| chr5  | 1.55E+08 | 1.55E+08 | LARP1     | 3.80E-09 | + | 1.55E+08 | 1.55E+08 | 0 | 1 | 800,         | 0             | -8.42 | -7.84 | 3.26 | -0.622 | -1.75 |
| chr5  | 1.8E+08  | 1.8E+08  | MAML1     | 8.50E-09 | + | 1.8E+08  | 1.8E+08  | 0 | 1 | 1294,        | 0             | -8.07 | -7.53 | 6.73 | -0.622 | -1.75 |
| chr10 | 21515212 | 21515954 | SKIDA1    | 3.30E-07 | - | 21515212 | 21515954 | 0 | 1 | 742,         | 0             | -6.48 | -6.13 | 6.45 | -0.623 | -1.75 |
| chr19 | 21183818 | 21184019 | ZNF431    | 1.70E-07 | + | 21183818 | 21184019 | 0 | 1 | 201,         | 0             | -6.78 | -6.4  | 4.88 | -0.623 | -1.75 |
| chr16 | 71648947 | 71649997 | PHLPP2    | 3.30E-07 | - | 71648947 | 71649997 | 0 | 1 | 1050,        | 0             | -6.48 | -6.13 | 7.75 | -0.613 | -1.74 |
| chr10 | 1.26E+08 | 1.26E+08 | DHX32     | 4.80E-06 | - | 1.26E+08 | 1.26E+08 | 0 | 2 | 82,19,       | 0,10440       | -5.32 | -5.07 | 2.67 | -0.616 | -1.74 |
| chr1  | 33146889 | 33146989 | TRIM62    | 0.0013   | - | 33146889 | 33146989 | 0 | 1 | 100,         | 0             | -2.9  | -1.94 | 1.5  | -0.618 | -1.74 |
| chr6  | 7231253  | 7240482  | RREB1     | 3.20E-12 | + | 7231253  | 7240482  | 0 | 2 | 654,45,      | 0,9184        | -11.5 | -10.3 | 5    | -0.616 | -1.74 |
| chr4  | 1.7E+08  | 1.7E+08  | NEK1      | 9.10E-07 | - | 1.7E+08  | 1.7E+08  | 0 | 5 | 17,51,60,60, | 0,149,294,599 | -6.04 | -5.73 | 1.95 | -0.619 | -1.74 |
| chr15 | 41561803 | 41562004 | TYRO3     | 2.70E-05 | + | 41561803 | 41562004 | 0 | 1 | 201,         | 0             | -4.57 | -3.46 | 3.67 | -0.611 | -1.73 |
| chr22 | 20116083 | 20116381 | TRMT2A    | 4.70E-05 | - | 20116083 | 20116381 | 0 | 1 | 298,         | 0             | -4.33 | -4.14 | 5.1  | -0.609 | -1.73 |
| chr17 | 75128931 | 75129974 | ARMC7     | 5.50E-09 | + | 75128931 | 75129974 | 0 | 1 | 1043,        | 0             | -8.26 | -7.7  | 10.2 | -0.612 | -1.73 |
| chr21 | 26844961 | 26845260 | ADAMTS1   | 1.60E-05 | - | 26844961 | 26845260 | 0 | 1 | 299,         | 0             | -4.8  | -4.58 | 2.82 | -0.609 | -1.73 |
| chr6  | 1.39E+08 | 1.39E+08 | CITED2    | 1.40E-05 | - | 1.39E+08 | 1.39E+08 | 0 | 1 | 938,         | 0             | -4.86 | -4.64 | 4.76 | -0.61  | -1.73 |
| chr14 | 61279970 | 61280168 | TMEM30B   | 0.00032  | - | 61279970 | 61280168 | 0 | 1 | 198,         | 0             | -3.49 | -3.34 | 3.6  | -0.612 | -1.73 |
| chr18 | 5290466  | 5290616  | ZBTB14    | 7.90E-12 | - | 5290466  | 5290616  | 0 | 1 | 150,         | 0             | -11.1 | -8.95 | 2    | -0.611 | -1.73 |
| chr5  | 61347371 | 61347569 | AC122718  | 5.60E-05 | + | 61347371 | 61347569 | 0 | 1 | 198,         | 0             | -4.25 | -3.17 | 5.5  | -0.612 | -1.73 |
| chr15 | 55359576 | 55359876 | CCPG1     | 3.00E-08 | - | 55359576 | 55359876 | 0 | 1 | 300,         | 0             | -7.52 | -7.05 | 5.75 | -0.612 | -1.73 |
| chr8  | 1.44E+08 | 1.44E+08 | EPPK1     | 2.20E-06 | - | 1.44E+08 | 1.44E+08 | 0 | 1 | 101,         | 0             | -5.65 | -4.42 | 1.75 | -0.611 | -1.73 |
| chr15 | 65118622 | 65118722 | PDCD7     | 2.90E-05 | - | 65118622 | 65118722 | 0 | 1 | 100,         | 0             | -4.54 | -3.44 | 2.6  | -0.606 | -1.72 |
| chr19 | 41432561 | 41432662 | DMAC2     | 6.20E-06 | - | 41432561 | 41432662 | 0 | 1 | 101,         | 0             | -5.21 | -4.96 | 2.62 | -0.603 | -1.72 |
| chr2  | 2.19E+08 | 2.19E+08 | TLL4      | 1.20E-07 | + | 2.19E+08 | 2.19E+08 | 0 | 1 | 251,         | 0             | -6.92 | -6.52 | 1.92 | -0.605 | -1.72 |
| chr9  | 1.36E+08 | 1.36E+08 | SEC16A    | 1.90E-05 | - | 1.36E+08 | 1.36E+08 | 0 | 1 | 250,         | 0             | -4.71 | -3.59 | 2.55 | -0.606 | -1.72 |
| chr16 | 31914514 | 31914764 | ZNF267    | 5.90E-10 | + | 31914514 | 31914764 | 0 | 1 | 250,         | 0             | -9.23 | -8.51 | 2.53 | -0.604 | -1.72 |
| chr9  | 1.14E+08 | 1.14E+08 | AL162727. | 0.00066  | + | 1.14E+08 | 1.14E+08 | 0 | 1 | 151,         | 0             | -3.18 | -2.2  | 3.56 | -0.606 | -1.72 |
| chr17 | 15706440 | 15716802 | ACO05324  | 3.20E-11 | + | 15706440 | 15716802 | 0 | 3 | 61,93,744,   | 0,1714,9618   | -10.5 | -9.55 | 8.07 | -0.604 | -1.72 |
| chr3  | 47909155 | 47909306 | MAP4      | 0.00043  | - | 47909155 | 47909306 | 0 | 1 | 151,         | 0             | -3.37 | -3.22 | 2    | -0.599 | -1.71 |
| chr2  | 47799096 | 47799946 | MSH6      | 4.00E-11 | + | 47799096 | 47799946 | 0 | 1 | 850,         | 0             | -10.4 | -9.46 | 3.14 | -0.599 | -1.71 |
| chr10 | 80431988 | 80432338 | PRXL2A    | 3.90E-10 | + | 80431988 | 80432338 | 0 | 1 | 350,         | 0             | -9.41 | -8.66 | 5.45 | -0.6   | -1.71 |
| chr2  | 2.19E+08 | 2.19E+08 | DNAJB2    | 5.80E-06 | + | 2.19E+08 | 2.19E+08 | 0 | 1 | 300,         | 0             | -5.24 | -4.99 | 2.94 | -0.599 | -1.71 |

|       |          |          |          |          |   |          |          |   |   |            |             |       |       |      |        |       |
|-------|----------|----------|----------|----------|---|----------|----------|---|---|------------|-------------|-------|-------|------|--------|-------|
| chr5  | 1.42E+08 | 1.42E+08 | PCDH1    | 1.90E-05 | - | 1.42E+08 | 1.42E+08 | 0 | 1 | 249,       | 0           | -4.73 | -3.6  | 3.83 | -0.599 | -1.71 |
| chr9  | 1.37E+08 | 1.37E+08 | FBXW5    | 2.20E-06 | - | 1.37E+08 | 1.37E+08 | 0 | 1 | 200,       | 0           | -5.65 | -5.37 | 1.98 | -0.599 | -1.71 |
| chr19 | 21117523 | 21117973 | ZNF714   | 3.20E-10 | + | 21117523 | 21117973 | 0 | 1 | 450,       | 0           | -9.49 | -8.72 | 5    | -0.6   | -1.71 |
| chr3  | 1.7E+08  | 1.7E+08  | PHC3     | 4.20E-05 | - | 1.7E+08  | 1.7E+08  | 0 | 1 | 400,       | 0           | -4.38 | -4.19 | 4    | -0.599 | -1.71 |
| chr4  | 1.38E+08 | 1.38E+08 | PCDH18   | 5.60E-05 | - | 1.38E+08 | 1.38E+08 | 0 | 1 | 150,       | 0           | -4.25 | -3.68 | 5.25 | -0.599 | -1.71 |
| chr22 | 40881863 | 40882063 | XPNPEP3  | 3.30E-07 | + | 40881863 | 40882063 | 0 | 1 | 200,       | 0           | -6.48 | -6.13 | 2.36 | -0.602 | -1.71 |
| chr9  | 35547539 | 35548040 | RUSC2    | 4.80E-06 | + | 35547539 | 35548040 | 0 | 1 | 501,       | 0           | -5.32 | -5.07 | 4.77 | -0.602 | -1.71 |
| chr2  | 2.03E+08 | 2.03E+08 | BMPR2    | 1.00E-11 | + | 2.03E+08 | 2.03E+08 | 0 | 2 | 32,1215,   | 0,2395      | -11   | -9.9  | 7.9  | -0.6   | -1.71 |
| chr9  | 1.37E+08 | 1.37E+08 | AJM1     | 0.00011  | + | 1.37E+08 | 1.37E+08 | 0 | 1 | 250,       | 0           | -3.94 | -2.89 | 3.33 | -0.599 | -1.71 |
| chr11 | 10854046 | 10854646 | ZBED5    | 1.60E-11 | - | 10854046 | 10854646 | 0 | 1 | 600,       | 0           | -10.8 | -9.8  | 4.62 | -0.599 | -1.71 |
| chr6  | 1.14E+08 | 1.14E+08 | MARCKS   | 2.60E-06 | + | 1.14E+08 | 1.14E+08 | 0 | 1 | 100,       | 0           | -5.59 | -4.37 | 3.2  | -0.602 | -1.71 |
| chr20 | 52084189 | 52085188 | ZFP64    | 7.90E-14 | - | 52084189 | 52085188 | 0 | 1 | 999,       | 0           | -13.1 | -11.6 | 7.62 | -0.595 | -1.7  |
| chr4  | 1.87E+08 | 1.87E+08 | FAT1     | 2.30E-06 | - | 1.87E+08 | 1.87E+08 | 0 | 1 | 699,       | 0           | -5.63 | -5.35 | 2.69 | -0.598 | -1.7  |
| chr12 | 69258651 | 69258952 | CPSF6    | 5.90E-10 | + | 69258651 | 69258952 | 0 | 1 | 301,       | 0           | -9.23 | -8.51 | 1.89 | -0.599 | -1.7  |
| chr1  | 2.23E+08 | 2.23E+08 | MIA3     | 3.40E-10 | + | 2.23E+08 | 2.23E+08 | 0 | 1 | 748,       | 0           | -9.47 | -8.71 | 6.75 | -0.598 | -1.7  |
| chr4  | 1.69E+08 | 1.69E+08 | SH3RF1   | 3.00E-08 | - | 1.69E+08 | 1.69E+08 | 0 | 2 | 390,158,   | 0,10549     | -7.52 | -7.05 | 9    | -0.596 | -1.7  |
| chr3  | 1.24E+08 | 1.24E+08 | CCDC14   | 5.00E-12 | - | 1.24E+08 | 1.24E+08 | 0 | 1 | 450,       | 0           | -11.3 | -10.2 | 5.17 | -0.599 | -1.7  |
| chr3  | 15046520 | 15046969 | NR2C2    | 3.40E-05 | + | 15046520 | 15046969 | 0 | 1 | 449,       | 0           | -4.47 | -4.27 | 2.53 | -0.599 | -1.7  |
| chr14 | 20693574 | 20699378 | AL163636 | 4.40E-08 | + | 20693574 | 20699378 | 0 | 2 | 76,24,     | 0,5780      | -7.36 | -5.91 | 4.33 | -0.598 | -1.7  |
| chr8  | 1.44E+08 | 1.44E+08 | EPPK1    | 4.10E-06 | - | 1.44E+08 | 1.44E+08 | 0 | 1 | 101,       | 0           | -5.39 | -4.19 | 4.5  | -0.598 | -1.7  |
| chr8  | 41932127 | 41933328 | KAT6A    | 2.00E-12 | - | 41932127 | 41933328 | 0 | 1 | 1201,      | 0           | -11.7 | -10.5 | 10.5 | -0.592 | -1.69 |
| chr22 | 50220549 | 50221347 | TUBGCP6  | 7.60E-07 | - | 50220549 | 50221347 | 0 | 1 | 798,       | 0           | -6.12 | -5.8  | 8.1  | -0.592 | -1.69 |
| chr1  | 1.85E+08 | 1.85E+08 | FAM129A  | 7.80E-07 | - | 1.85E+08 | 1.85E+08 | 0 | 1 | 200,       | 0           | -6.11 | -5.79 | 1.75 | -0.589 | -1.69 |
| chr8  | 1.28E+08 | 1.28E+08 | MYC      | 1.00E-10 | + | 1.28E+08 | 1.28E+08 | 0 | 1 | 649,       | 0           | -10   | -9.13 | 4.63 | -0.593 | -1.69 |
| chr2  | 99162611 | 99162909 | LIPT1    | 1.90E-05 | + | 99162611 | 99162909 | 0 | 1 | 298,       | 0           | -4.73 | -3.61 | 5.5  | -0.589 | -1.69 |
| chr7  | 1.35E+08 | 1.35E+08 | TMEM140  | 0.0017   | + | 1.35E+08 | 1.35E+08 | 0 | 1 | 296,       | 0           | -2.76 | -2.64 | 2.75 | -0.589 | -1.69 |
| chr3  | 33389580 | 33390427 | UBP1     | 5.10E-10 | - | 33389580 | 33390427 | 0 | 1 | 847,       | 0           | -9.29 | -8.56 | 5.2  | -0.592 | -1.69 |
| chr1  | 1.56E+08 | 1.56E+08 | SLC25A44 | 2.90E-09 | + | 1.56E+08 | 1.56E+08 | 0 | 2 | 339,12,    | 0,7728      | -8.54 | -7.93 | 9.78 | -0.592 | -1.69 |
| chr9  | 35107833 | 35108033 | FAM214B  | 0.00032  | - | 35107833 | 35108033 | 0 | 1 | 200,       | 0           | -3.49 | -2.49 | 2.88 | -0.587 | -1.68 |
| chr6  | 1.5E+08  | 1.5E+08  | ULBP1    | 0.00024  | + | 1.5E+08  | 1.5E+08  | 0 | 1 | 100,       | 0           | -3.62 | -2.61 | 3    | -0.587 | -1.68 |
| chr12 | 71632092 | 71632491 | ZFC3H1   | 7.40E-08 | - | 71632092 | 71632491 | 0 | 1 | 399,       | 0           | -7.13 | -6.71 | 4.5  | -0.586 | -1.68 |
| chr16 | 72795139 | 72796189 | ZFXH3    | 6.80E-08 | - | 72795139 | 72796189 | 0 | 1 | 1050,      | 0           | -7.17 | -6.74 | 4.16 | -0.587 | -1.68 |
| chr2  | 2.32E+08 | 2.32E+08 | PDE6D    | 1.30E-07 | - | 2.32E+08 | 2.32E+08 | 0 | 1 | 100,       | 0           | -6.88 | -5.5  | 1.67 | -0.587 | -1.68 |
| chr5  | 5463781  | 5464381  | ICE1     | 9.10E-09 | + | 5463781  | 5464381  | 0 | 1 | 600,       | 0           | -8.04 | -7.5  | 5.83 | -0.588 | -1.68 |
| chr14 | 1.06E+08 | 1.06E+08 | TMEM121  | 6.20E-05 | + | 1.06E+08 | 1.06E+08 | 0 | 1 | 198,       | 0           | -4.21 | -4.03 | 2.27 | -0.586 | -1.68 |
| chr5  | 1.71E+08 | 1.71E+08 | AC091980 | 5.40E-10 | - | 1.71E+08 | 1.71E+08 | 0 | 1 | 395,       | 0           | -9.27 | -8.55 | 5.25 | -0.586 | -1.68 |
| chr19 | 1087666  | 1087766  | POLR2E   | 4.60E-07 | - | 1087666  | 1087766  | 0 | 1 | 100,       | 0           | -6.34 | -5.03 | 2.38 | -0.583 | -1.67 |
| chr22 | 17728018 | 17728218 | BCL2L13  | 6.50E-06 | + | 17728018 | 17728218 | 0 | 1 | 200,       | 0           | -5.19 | -4.94 | 2    | -0.583 | -1.67 |
| chr22 | 24321322 | 24322915 | SPECC1L  | 3.00E-10 | + | 24321322 | 24322915 | 0 | 1 | 1593,      | 0           | -9.53 | -8.75 | 8.31 | -0.583 | -1.67 |
| chrX  | 1.2E+08  | 1.2E+08  | 6-Sep    | 3.90E-09 | - | 1.2E+08  | 1.2E+08  | 0 | 3 | 86,143,22, | 0,3937,7604 | -8.41 | -7.82 | 2.48 | -0.584 | -1.67 |
| chr14 | 50329758 | 50330159 | DMAC2L   | 1.00E-06 | + | 50329758 | 50330159 | 0 | 1 | 401,       | 0           | -6    | -4.73 | 3.2  | -0.583 | -1.67 |
| chr5  | 1.77E+08 | 1.77E+08 | NSD1     | 4.40E-10 | + | 1.77E+08 | 1.77E+08 | 0 | 1 | 351,       | 0           | -9.36 | -8.62 | 1.73 | -0.581 | -1.67 |
| chr18 | 3457436  | 3458184  | TGIF1    | 2.50E-13 | + | 3457436  | 3458184  | 0 | 1 | 748,       | 0           | -12.6 | -11.1 | 7.81 | -0.581 | -1.67 |
| chr3  | 48659185 | 48659686 | CELSR3   | 1.40E-06 | - | 48659185 | 48659686 | 0 | 1 | 501,       | 0           | -5.86 | -5.56 | 9.25 | -0.573 | -1.66 |
| chr12 | 1.33E+08 | 1.33E+08 | ZNF268   | 2.00E-12 | + | 1.33E+08 | 1.33E+08 | 0 | 1 | 1400,      | 0           | -11.7 | -10.4 | 11.2 | -0.578 | -1.66 |
| chr5  | 663533   | 665241   | CEP72    | 0.0059   | + | 663533   | 665241   | 0 | 2 | 39,62,     | 0,1646      | -2.23 | -1.32 | 1.67 | -0.576 | -1.66 |
| chr3  | 50353726 | 50353876 | CYB561D2 | 1.00E-04 | + | 50353726 | 50353876 | 0 | 1 | 150,       | 0           | -3.98 | -3.8  | 2.75 | -0.573 | -1.66 |
| chr1  | 39269025 | 39269376 | MACF1    | 0.002    | + | 39269025 | 39269376 | 0 | 1 | 351,       | 0           | -2.7  | -2.57 | 5.11 | -0.576 | -1.66 |
| chr6  | 1.38E+08 | 1.38E+08 | NHSL1    | 0.00045  | - | 1.38E+08 | 1.38E+08 | 0 | 1 | 150,       | 0           | -3.35 | -2.36 | 4    | -0.576 | -1.66 |
| chr1  | 1.83E+08 | 1.83E+08 | LAMC1    | 5.80E-05 | + | 1.83E+08 | 1.83E+08 | 0 | 1 | 151,       | 0           | -4.24 | -4.06 | 1.47 | -0.573 | -1.66 |
| chr2  | 2.16E+08 | 2.16E+08 | SMARCAL1 | 8.90E-09 | + | 2.16E+08 | 2.16E+08 | 0 | 1 | 301,       | 0           | -8.05 | -7.51 | 3.03 | -0.579 | -1.66 |

|       |          |          |           |          |   |          |          |   |   |             |             |       |       |      |        |       |
|-------|----------|----------|-----------|----------|---|----------|----------|---|---|-------------|-------------|-------|-------|------|--------|-------|
| chr4  | 77032028 | 77032129 | 11-Sep    | 4.30E-06 | + | 77032028 | 77032129 | 0 | 1 | 101,        | 0           | -5.37 | -4.17 | 2    | -0.575 | -1.66 |
| chr1  | 2.47E+08 | 2.47E+08 | AHCTF1    | 3.30E-08 | - | 2.47E+08 | 2.47E+08 | 0 | 1 | 101,        | 0           | -7.48 | -7.01 | 1.71 | -0.576 | -1.66 |
| chr7  | 1546512  | 1547160  | TMEM184,  | 0.00012  | - | 1546512  | 1547160  | 0 | 1 | 648,        | 0           | -3.91 | -3.75 | 4.83 | -0.575 | -1.66 |
| chr17 | 42680172 | 42680519 | CCR10     | 1.00E-04 | - | 42680172 | 42680519 | 0 | 1 | 347,        | 0           | -3.98 | -3.81 | 4.58 | -0.576 | -1.66 |
| chr1  | 3746377  | 3746826  | TP73-AS1  | 4.20E-08 | - | 3746377  | 3746826  | 0 | 1 | 449,        | 0           | -7.38 | -6.93 | 8.33 | -0.576 | -1.66 |
| chrX  | 55486645 | 55487141 | USP51     | 2.00E-06 | - | 55486645 | 55487141 | 0 | 1 | 496,        | 0           | -5.69 | -4.45 | 4.43 | -0.579 | -1.66 |
| chr2  | 74462549 | 74462898 | MOGS      | 1.40E-06 | - | 74462549 | 74462898 | 0 | 1 | 349,        | 0           | -5.84 | -5.54 | 3.11 | -0.57  | -1.65 |
| chr2  | 38074506 | 38074707 | CYP1B1    | 0.00029  | - | 38074506 | 38074707 | 0 | 1 | 201,        | 0           | -3.54 | -3.38 | 2.31 | -0.571 | -1.65 |
| chr4  | 67514165 | 67514616 | CENPC     | 1.80E-10 | - | 67514165 | 67514616 | 0 | 1 | 451,        | 0           | -9.74 | -8.92 | 5.43 | -0.568 | -1.65 |
| chr6  | 44255276 | 44255621 | SLC35B2   | 1.80E-05 | - | 44255276 | 44255621 | 0 | 1 | 345,        | 0           | -4.75 | -4.54 | 1.88 | -0.571 | -1.65 |
| chr1  | 85252529 | 85258718 | C1orf52   | 9.80E-08 | - | 85252529 | 85258718 | 0 | 3 | 173,29,195, | 0,4913,5994 | -7.01 | -6.6  | 2.88 | -0.572 | -1.65 |
| chr17 | 41853583 | 41855224 | KLHL11    | 7.90E-14 | - | 41853583 | 41855224 | 0 | 1 | 1641,       | 0           | -13.1 | -11.6 | 9.37 | -0.568 | -1.65 |
| chr12 | 45851389 | 45852838 | ARID2     | 4.00E-12 | + | 45851389 | 45852838 | 0 | 1 | 1449,       | 0           | -11.4 | -10.3 | 8.25 | -0.568 | -1.65 |
| chr7  | 1E+08    | 1E+08    | SPDYE3    | 1.60E-08 | + | 1E+08    | 1E+08    | 0 | 1 | 150,        | 0           | -7.8  | -6.28 | 1.7  | -0.57  | -1.65 |
| chr22 | 24321299 | 24322888 | SPECC1L-, | 1.30E-09 | + | 24321299 | 24322888 | 0 | 1 | 1589,       | 0           | -8.87 | -8.21 | 6    | -0.571 | -1.65 |
| chr11 | 77698643 | 77701420 | RSF1      | 1.00E-12 | - | 77698643 | 77701420 | 0 | 2 | 50,700,     | 0,2077      | -12   | -10.7 | 3.79 | -0.565 | -1.64 |
| chr19 | 10295603 | 10296429 | ICAM5     | 3.00E-04 | + | 10295603 | 10296429 | 0 | 2 | 9,91,       | 0,735       | -3.52 | -3.37 | 1.93 | -0.565 | -1.64 |
| chr2  | 2.19E+08 | 2.19E+08 | ZNF142    | 4.80E-06 | - | 2.19E+08 | 2.19E+08 | 0 | 1 | 1150,       | 0           | -5.32 | -5.07 | 7.17 | -0.565 | -1.64 |
| chr1  | 2.12E+08 | 2.12E+08 | LPGAT1    | 0.0036   | - | 2.12E+08 | 2.12E+08 | 0 | 1 | 151,        | 0           | -2.44 | -2.32 | 3.33 | -0.566 | -1.64 |
| chr4  | 1.53E+08 | 1.53E+08 | FHDC1     | 6.30E-06 | + | 1.53E+08 | 1.53E+08 | 0 | 1 | 301,        | 0           | -5.2  | -4.02 | 3    | -0.565 | -1.64 |
| chr1  | 1.57E+08 | 1.57E+08 | ISG20L2   | 7.90E-11 | - | 1.57E+08 | 1.57E+08 | 0 | 1 | 1242,       | 0           | -10.1 | -9.23 | 8    | -0.565 | -1.64 |
| chr1  | 1.55E+08 | 1.55E+08 | RUSC1     | 2.80E-10 | + | 1.55E+08 | 1.55E+08 | 0 | 2 | 48,52,      | 0,744       | -9.55 | -8.77 | 2.71 | -0.565 | -1.64 |
| chr2  | 10211027 | 10211377 | RRM2      | 0.00028  | + | 10211027 | 10211377 | 0 | 1 | 350,        | 0           | -3.56 | -2.55 | 4.5  | -0.566 | -1.64 |
| chr19 | 37670123 | 37670371 | ZNF781    | 0.00011  | - | 37670123 | 37670371 | 0 | 1 | 248,        | 0           | -3.95 | -2.9  | 3.25 | -0.565 | -1.64 |
| chr19 | 1925413  | 1925713  | SCAMP4    | 2.10E-08 | + | 1925413  | 1925713  | 0 | 1 | 300,        | 0           | -7.68 | -7.19 | 3.21 | -0.565 | -1.64 |
| chr9  | 33347770 | 33348221 | NFX1      | 3.40E-07 | + | 33347770 | 33348221 | 0 | 1 | 451,        | 0           | -6.47 | -6.12 | 7.08 | -0.563 | -1.63 |
| chr22 | 41357952 | 41358103 | ZC3H7B    | 3.80E-07 | + | 41357952 | 41358103 | 0 | 1 | 151,        | 0           | -6.42 | -6.08 | 1.5  | -0.563 | -1.63 |
| chr7  | 1E+08    | 1E+08    | ZKSCAN1   | 2.20E-07 | + | 1E+08    | 1E+08    | 0 | 1 | 1047,       | 0           | -6.65 | -6.28 | 9    | -0.56  | -1.63 |
| chr1  | 29148289 | 29154493 | SRSF4     | 1.60E-12 | - | 29148289 | 29154493 | 0 | 3 | 937,90,19,  | 0,1813,6185 | -11.8 | -10.6 | 3.5  | -0.56  | -1.63 |
| chr12 | 1.22E+08 | 1.22E+08 | RHOF      | 7.60E-05 | - | 1.22E+08 | 1.22E+08 | 0 | 1 | 100,        | 0           | -4.12 | -3.95 | 2.57 | -0.559 | -1.63 |
| chr4  | 1.19E+08 | 1.19E+08 | USP53     | 5.50E-08 | + | 1.19E+08 | 1.19E+08 | 0 | 1 | 551,        | 0           | -7.26 | -6.82 | 7.5  | -0.563 | -1.63 |
| chr7  | 997332   | 997482   | C7orf50   | 7.60E-07 | - | 997332   | 997482   | 0 | 1 | 150,        | 0           | -6.12 | -5.8  | 1.66 | -0.561 | -1.63 |
| chr9  | 12775463 | 12775563 | LURAP1L   | 0.0065   | + | 12775463 | 12775563 | 0 | 1 | 100,        | 0           | -2.19 | -2.08 | 9.27 | -0.561 | -1.63 |
| chr15 | 59076123 | 59081193 | RNF111    | 5.50E-07 | + | 59076123 | 59081193 | 0 | 2 | 92,258,     | 0,4812      | -6.26 | -5.93 | 4.27 | -0.559 | -1.63 |
| chr3  | 46202608 | 46204306 | CCR1      | 1.90E-10 | - | 46202608 | 46204306 | 0 | 1 | 1698,       | 0           | -9.73 | -8.91 | 7.67 | -0.562 | -1.63 |
| chr9  | 1.13E+08 | 1.13E+08 | KIAA1958  | 6.30E-14 | + | 1.13E+08 | 1.13E+08 | 0 | 1 | 849,        | 0           | -13.2 | -11.6 | 5.77 | -0.559 | -1.63 |
| chr17 | 46026537 | 46026987 | MAPT      | 3.30E-08 | + | 46026537 | 46026987 | 0 | 1 | 450,        | 0           | -7.48 | -7.01 | 6.33 | -0.559 | -1.63 |
| chr11 | 65641220 | 65641469 | SIPA1     | 5.50E-06 | + | 65641220 | 65641469 | 0 | 1 | 249,        | 0           | -5.26 | -5.01 | 6.63 | -0.559 | -1.63 |
| chr12 | 1.02E+08 | 1.02E+08 | NUP37     | 4.50E-07 | - | 1.02E+08 | 1.02E+08 | 0 | 1 | 101,        | 0           | -6.35 | -5.03 | 1.6  | -0.556 | -1.62 |
| chr6  | 1.27E+08 | 1.27E+08 | ECHDC1    | 3.10E-06 | - | 1.27E+08 | 1.27E+08 | 0 | 2 | 122,28,     | 0,4348      | -5.51 | -5.24 | 2.26 | -0.557 | -1.62 |
| chr1  | 1.55E+08 | 1.55E+08 | ASH1L     | 2.30E-07 | - | 1.55E+08 | 1.55E+08 | 0 | 1 | 500,        | 0           | -6.64 | -6.27 | 3.65 | -0.554 | -1.62 |
| chr11 | 1.18E+08 | 1.18E+08 | KMT2A     | 9.10E-10 | + | 1.18E+08 | 1.18E+08 | 0 | 1 | 301,        | 0           | -9.04 | -8.35 | 2.25 | -0.556 | -1.62 |
| chr9  | 1.36E+08 | 1.36E+08 | CAMSAP1   | 3.50E-07 | - | 1.36E+08 | 1.36E+08 | 0 | 1 | 200,        | 0           | -6.46 | -6.11 | 1.88 | -0.554 | -1.62 |
| chr2  | 39769862 | 39771595 | THUMP2    | 6.20E-08 | - | 39769862 | 39771595 | 0 | 2 | 257,91,     | 0,1642      | -7.21 | -6.77 | 4.14 | -0.555 | -1.62 |
| chr3  | 1.43E+08 | 1.43E+08 | ATR       | 4.90E-06 | - | 1.43E+08 | 1.43E+08 | 0 | 1 | 401,        | 0           | -5.31 | -5.05 | 3    | -0.557 | -1.62 |
| chr15 | 64460791 | 64500142 | ZNF609    | 2.50E-13 | + | 64460791 | 64500142 | 0 | 2 | 47,851,     | 0,38500     | -12.6 | -11.2 | 4.84 | -0.554 | -1.62 |
| chr19 | 11721608 | 11722101 | ZNF823    | 0.00047  | - | 11721608 | 11722101 | 0 | 1 | 493,        | 0           | -3.33 | -3.18 | 6.5  | -0.554 | -1.62 |
| chr1  | 16871144 | 16871294 | BX284668. | 3.10E-05 | + | 16871144 | 16871294 | 0 | 1 | 150,        | 0           | -4.51 | -3.41 | 1.73 | -0.554 | -1.62 |
| chr2  | 55598533 | 55598933 | PPP4R3B   | 5.50E-07 | - | 55598533 | 55598933 | 0 | 1 | 400,        | 0           | -6.26 | -5.93 | 3.05 | -0.554 | -1.62 |
| chr7  | 1.4E+08  | 1.4E+08  | HIPK2     | 1.10E-07 | - | 1.4E+08  | 1.4E+08  | 0 | 1 | 500,        | 0           | -6.96 | -6.55 | 8.9  | -0.55  | -1.61 |
| chr10 | 27035089 | 27035739 | ANKRD26   | 3.50E-07 | - | 27035089 | 27035739 | 0 | 1 | 650,        | 0           | -6.46 | -5.14 | 4    | -0.553 | -1.61 |



|       |          |          |          |          |   |          |          |   |   |         |         |   |       |       |      |        |       |
|-------|----------|----------|----------|----------|---|----------|----------|---|---|---------|---------|---|-------|-------|------|--------|-------|
| chr4  | 1.46E+08 | 1.46E+08 | ZNF827   | 8.50E-08 | - | 1.46E+08 | 1.46E+08 | 0 | 2 | 640,60, | 0,35789 |   | -7.07 | -6.66 | 4.82 | -0.553 | -1.61 |
| chr16 | 89230636 | 89231485 | ZNF778   | 8.90E-05 | + | 89230636 | 89231485 | 0 | 1 | 849,    |         | 0 | -4.05 | -3.87 | 5.8  | -0.551 | -1.61 |
| chr2  | 1.31E+08 | 1.31E+08 | POTEE    | 7.40E-09 | + | 1.31E+08 | 1.31E+08 | 0 | 1 | 300,    |         | 0 | -8.13 | -7.59 | 2    | -0.548 | -1.61 |
| chr20 | 34749802 | 34750402 | NCOA6    | 9.50E-09 | - | 34749802 | 34750402 | 0 | 1 | 600,    |         | 0 | -8.02 | -7.49 | 4.56 | -0.551 | -1.61 |
| chr15 | 43455996 | 43456647 | TP53BP1  | 1.70E-07 | - | 43455996 | 43456647 | 0 | 1 | 651,    |         | 0 | -6.78 | -6.39 | 4.33 | -0.547 | -1.6  |
| chr12 | 1.2E+08  | 1.2E+08  | CN1      | 5.00E-09 | - | 1.2E+08  | 1.2E+08  | 0 | 1 | 399,    |         | 0 | -8.3  | -7.73 | 2.92 | -0.545 | -1.6  |
| chr5  | 95961701 | 95961801 | ELL2     | 7.80E-06 | - | 95961701 | 95961801 | 0 | 1 | 100,    |         | 0 | -5.11 | -3.94 | 2    | -0.543 | -1.6  |
| chr4  | 73098282 | 73100922 | ANKRD17  | 2.60E-09 | - | 73098282 | 73100922 | 0 | 2 | 238,62, | 0,2578  |   | -8.59 | -7.98 | 1.89 | -0.544 | -1.6  |
| chr19 | 7863983  | 7864232  | EVI5L    | 2.10E-05 | + | 7863983  | 7864232  | 0 | 1 | 249,    |         | 0 | -4.67 | -4.46 | 2.73 | -0.543 | -1.6  |
| chr8  | 8890146  | 8891092  | MFHAS1   | 1.10E-08 | - | 8890146  | 8891092  | 0 | 1 | 946,    |         | 0 | -7.96 | -7.44 | 7.44 | -0.547 | -1.6  |
| chr8  | 25410174 | 25411365 | DOCK5    | 4.80E-07 | + | 25410174 | 25411365 | 0 | 2 | 28,172, | 0,1019  |   | -6.32 | -5.98 | 4    | -0.545 | -1.6  |
| chr21 | 26837493 | 26838498 | ADAMTS1  | 1.30E-08 | - | 26837493 | 26838498 | 0 | 2 | 785,60, | 0,945   |   | -7.87 | -7.36 | 6.29 | -0.547 | -1.6  |
| chr4  | 56349340 | 56349984 | AASDH    | 1.50E-07 | - | 56349340 | 56349984 | 0 | 1 | 644,    |         | 0 | -6.82 | -6.43 | 5.08 | -0.545 | -1.6  |
| chr1  | 20483569 | 20484414 | CAMK2N1  | 4.90E-05 | - | 20483569 | 20484414 | 0 | 2 | 150,48, | 0,797   |   | -4.31 | -3.23 | 2.8  | -0.547 | -1.6  |
| chr22 | 20061728 | 20063413 | TANGO2   | 0.00014  | + | 20061728 | 20063413 | 0 | 2 | 74,76,  | 0,1609  |   | -3.86 | -2.82 | 3.5  | -0.543 | -1.6  |
| chr16 | 730358   | 730846   | CIAO3    | 1.20E-05 | - | 730358   | 730846   | 0 | 2 | 297,4,  | 0,484   |   | -4.93 | -4.71 | 3    | -0.541 | -1.59 |
| chr7  | 99669190 | 99669390 | CYP3A5   | 0.00026  | - | 99669190 | 99669390 | 0 | 1 | 200,    |         | 0 | -3.58 | -2.57 | 2.86 | -0.542 | -1.59 |
| chr7  | 73574388 | 73574488 | TBL2     | 1.90E-07 | - | 73574388 | 73574488 | 0 | 1 | 100,    |         | 0 | -6.73 | -5.37 | 2.4  | -0.541 | -1.59 |
| chr9  | 1.32E+08 | 1.32E+08 | SETX     | 3.20E-09 | - | 1.32E+08 | 1.32E+08 | 0 | 1 | 650,    |         | 0 | -8.49 | -7.9  | 3.92 | -0.541 | -1.59 |
| chr2  | 74425985 | 74426634 | RTKN     | 6.20E-09 | - | 74425985 | 74426634 | 0 | 1 | 649,    |         | 0 | -8.21 | -7.65 | 3.85 | -0.541 | -1.59 |
| chr1  | 1.72E+08 | 1.72E+08 | PRRC2C   | 1.60E-09 | + | 1.72E+08 | 1.72E+08 | 0 | 1 | 649,    |         | 0 | -8.8  | -8.16 | 2.42 | -0.541 | -1.59 |
| chr14 | 75783194 | 75783344 | TTL5     | 2.10E-05 | + | 75783194 | 75783344 | 0 | 1 | 150,    |         | 0 | -4.67 | -3.55 | 1.8  | -0.541 | -1.59 |
| chr11 | 63720348 | 63720998 | RTN3     | 5.60E-06 | + | 63720348 | 63720998 | 0 | 1 | 650,    |         | 0 | -5.25 | -5    | 6.4  | -0.543 | -1.59 |
| chr6  | 18465291 | 18465491 | RNF144B  | 7.10E-05 | + | 18465291 | 18465491 | 0 | 1 | 200,    |         | 0 | -4.15 | -3.08 | 4.75 | -0.541 | -1.59 |
| chr6  | 1.54E+08 | 1.54E+08 | CNKS3    | 5.50E-09 | - | 1.54E+08 | 1.54E+08 | 0 | 1 | 451,    |         | 0 | -8.26 | -7.69 | 5.6  | -0.541 | -1.59 |
| chr1  | 2.02E+08 | 2.02E+08 | IPO9     | 1.00E-11 | + | 2.02E+08 | 2.02E+08 | 0 | 1 | 499,    |         | 0 | -11   | -9.9  | 4.84 | -0.541 | -1.59 |
| chr20 | 297608   | 298645   | ZCCHC3   | 7.90E-10 | + | 297608   | 298645   | 0 | 1 | 1037,   |         | 0 | -9.1  | -8.4  | 5.48 | -0.54  | -1.59 |
| chr12 | 1.2E+08  | 1.2E+08  | PXN-AS1  | 3.50E-07 | + | 1.2E+08  | 1.2E+08  | 0 | 1 | 499,    |         | 0 | -6.46 | -6.11 | 3.86 | -0.541 | -1.59 |
| chr22 | 20997322 | 20997872 | AC002470 | 5.80E-08 | + | 20997322 | 20997872 | 0 | 1 | 550,    |         | 0 | -7.24 | -6.8  | 7.78 | -0.541 | -1.59 |
| chr19 | 50416046 | 50416246 | POLD1    | 5.10E-06 | + | 50416046 | 50416246 | 0 | 1 | 200,    |         | 0 | -5.29 | -4.1  | 4.43 | -0.537 | -1.58 |
| chr5  | 1.43E+08 | 1.43E+08 | NR3C1    | 3.70E-06 | - | 1.43E+08 | 1.43E+08 | 0 | 1 | 101,    |         | 0 | -5.43 | -4.23 | 3.8  | -0.537 | -1.58 |
| chr9  | 35853889 | 35854139 | TMEM8B   | 0.00013  | + | 35853889 | 35854139 | 0 | 1 | 250,    |         | 0 | -3.87 | -2.83 | 5.25 | -0.535 | -1.58 |
| chr17 | 17492871 | 17492972 | MED9     | 0.00098  | + | 17492871 | 17492972 | 0 | 1 | 101,    |         | 0 | -3.01 | -2.04 | 3.33 | -0.538 | -1.58 |
| chr17 | 82615459 | 82616008 | WDR45B   | 4.10E-09 | - | 82615459 | 82616008 | 0 | 1 | 549,    |         | 0 | -8.39 | -7.81 | 4.72 | -0.535 | -1.58 |
| chr4  | 20617649 | 20619514 | SLIT2    | 4.00E-15 | + | 20617649 | 20619514 | 0 | 2 | 1,747,  | 0,1118  |   | -14.4 | -12.6 | 8.14 | -0.535 | -1.58 |
| chr11 | 1.08E+08 | 1.08E+08 | NPAT     | 9.30E-07 | - | 1.08E+08 | 1.08E+08 | 0 | 1 | 350,    |         | 0 | -6.03 | -4.76 | 2.73 | -0.535 | -1.58 |
| chr1  | 2.28E+08 | 2.28E+08 | OBSCN    | 8.10E-05 | + | 2.28E+08 | 2.28E+08 | 0 | 1 | 301,    |         | 0 | -4.09 | -3.91 | 4.8  | -0.535 | -1.58 |
| chr19 | 46921673 | 46937281 | ARHGAP3  | 6.90E-10 | + | 46921673 | 46937281 | 0 | 2 | 683,18, | 0,15590 |   | -9.16 | -8.46 | 4    | -0.536 | -1.58 |
| chr22 | 21628283 | 21628625 | YDJC     | 0.00023  | - | 21628283 | 21628625 | 0 | 1 | 342,    |         | 0 | -3.64 | -3.49 | 3.36 | -0.538 | -1.58 |
| chr4  | 1.43E+08 | 1.43E+08 | USP38    | 1.40E-10 | + | 1.43E+08 | 1.43E+08 | 0 | 2 | 58,292, | 0,1214  |   | -9.86 | -9.01 | 6    | -0.535 | -1.58 |
| chr6  | 1.37E+08 | 1.37E+08 | MAP3K5   | 1.90E-10 | - | 1.37E+08 | 1.37E+08 | 0 | 1 | 100,    |         | 0 | -9.71 | -7.84 | 1.17 | -0.537 | -1.58 |
| chr5  | 1.55E+08 | 1.55E+08 | GEMIN5   | 1.20E-08 | - | 1.55E+08 | 1.55E+08 | 0 | 1 | 401,    |         | 0 | -7.91 | -7.39 | 6.12 | -0.533 | -1.57 |
| chr19 | 42080657 | 42081453 | ZNF574   | 2.80E-07 | + | 42080657 | 42081453 | 0 | 1 | 796,    |         | 0 | -6.56 | -6.2  | 3.65 | -0.531 | -1.57 |
| chr2  | 74552603 | 74553001 | LOXL3    | 1.50E-06 | - | 74552603 | 74553001 | 0 | 1 | 398,    |         | 0 | -5.83 | -5.54 | 8.75 | -0.533 | -1.57 |
| chr1  | 2.03E+08 | 2.03E+08 | KDM5B    | 3.20E-12 | - | 2.03E+08 | 2.03E+08 | 0 | 1 | 301,    |         | 0 | -11.5 | -10.3 | 2.33 | -0.533 | -1.57 |
| chr1  | 93180416 | 93180716 | CCDC18   | 0.00016  | + | 93180416 | 93180716 | 0 | 1 | 300,    |         | 0 | -3.79 | -3.63 | 5.25 | -0.532 | -1.57 |
| chr19 | 57357618 | 57357966 | AC005261 | 0.00022  | + | 57357618 | 57357966 | 0 | 1 | 348,    |         | 0 | -3.66 | -2.64 | 3.57 | -0.533 | -1.57 |
| chr9  | 1.13E+08 | 1.13E+08 | SXC31A2  | 3.90E-05 | + | 1.13E+08 | 1.13E+08 | 0 | 1 | 248,    |         | 0 | -4.41 | -3.32 | 2.5  | -0.533 | -1.57 |
| chr1  | 1.54E+08 | 1.54E+08 | HLX1     | 4.80E-05 | + | 1.54E+08 | 1.54E+08 | 0 | 1 | 99,     |         | 0 | -4.32 | -3.24 | 1.93 | -0.533 | -1.57 |
| chr1  | 1.54E+08 | 1.54E+08 | INTS3    | 1.80E-06 | + | 1.54E+08 | 1.54E+08 | 0 | 1 | 101,    |         | 0 | -5.75 | -5.47 | 1.88 | -0.53  | -1.57 |
| chr1  | 2.28E+08 | 2.28E+08 | GUK1     | 5.20E-05 | + | 2.28E+08 | 2.28E+08 | 0 | 1 | 250,    |         | 0 | -4.28 | -4.1  | 2.75 | -0.533 | -1.57 |

|       |          |          |          |          |   |          |          |   |   |                           |              |       |       |      |        |       |
|-------|----------|----------|----------|----------|---|----------|----------|---|---|---------------------------|--------------|-------|-------|------|--------|-------|
| chr4  | 1.5E+08  | 1.5E+08  | DCLK2    | 0.0031   | + | 1.5E+08  | 1.5E+08  | 0 | 1 | 150,                      | 0            | -2.51 | -1.59 | 2.12 | -0.533 | -1.57 |
| chr5  | 1.8E+08  | 1.8E+08  | TBC1D9B  | 2.00E-11 | - | 1.8E+08  | 1.8E+08  | 0 | 2 | 816,83,                   | 0,1941       | -10.7 | -9.73 | 9.09 | -0.53  | -1.57 |
| chr14 | 1.03E+08 | 1.03E+08 | CDC42BPE | 1.00E-05 | - | 1.03E+08 | 1.03E+08 | 0 | 4 | 315,71,106,10,4575,4777,6 |              | -5    | -4.77 | 4.33 | -0.531 | -1.57 |
| chr20 | 32166562 | 32166910 | TM9SF4   | 8.50E-10 | + | 32166562 | 32166910 | 0 | 1 | 348,                      | 0            | -9.07 | -8.38 | 3.4  | -0.527 | -1.56 |
| chr8  | 1.44E+08 | 1.44E+08 | PYCR3    | 0.00018  | - | 1.44E+08 | 1.44E+08 | 0 | 1 | 351,                      | 0            | -3.74 | -2.71 | 7.5  | -0.528 | -1.56 |
| chr6  | 93243304 | 93243455 | EPHA7    | 7.10E-05 | - | 93243304 | 93243455 | 0 | 1 | 151,                      | 0            | -4.15 | -3.97 | 6    | -0.528 | -1.56 |
| chr1  | 2.3E+08  | 2.3E+08  | GALNT2   | 7.90E-13 | + | 2.3E+08  | 2.3E+08  | 0 | 1 | 747,                      | 0            | -12.1 | -10.8 | 5.74 | -0.526 | -1.56 |
| chr2  | 99398827 | 99398927 | EIF5B    | 0.00011  | + | 99398827 | 99398927 | 0 | 1 | 100,                      | 0            | -3.97 | -3.8  | 1.67 | -0.528 | -1.56 |
| chr11 | 3638601  | 3638752  | ART5     | 1.70E-07 | - | 3638601  | 3638752  | 0 | 1 | 151,                      | 0            | -6.78 | -6.39 | 4.89 | -0.528 | -1.56 |
| chr1  | 2.35E+08 | 2.35E+08 | IRF2BP2  | 6.30E-14 | - | 2.35E+08 | 2.35E+08 | 0 | 3 | 800,61,35,                | 0,981,1394   | -13.2 | -11.6 | 10.7 | -0.528 | -1.56 |
| chr17 | 45983296 | 45983546 | MAPT     | 1.60E-05 | + | 45983296 | 45983546 | 0 | 1 | 250,                      | 0            | -4.79 | -4.57 | 9.25 | -0.53  | -1.56 |
| chr1  | 2.07E+08 | 2.07E+08 | CD55     | 1.80E-05 | + | 2.07E+08 | 2.07E+08 | 0 | 1 | 349,                      | 0            | -4.74 | -4.52 | 3.5  | -0.528 | -1.56 |
| chr12 | 1.33E+08 | 1.33E+08 | ZNF140   | 2.60E-08 | + | 1.33E+08 | 1.33E+08 | 0 | 1 | 299,                      | 0            | -7.58 | -6.09 | 4.2  | -0.53  | -1.56 |
| chr19 | 52840997 | 52841595 | ZNF468   | 1.60E-08 | - | 52840997 | 52841595 | 0 | 1 | 598,                      | 0            | -7.79 | -7.29 | 5.89 | -0.527 | -1.56 |
| chr20 | 35653292 | 35659012 | RBM12    | 2.00E-14 | - | 35653292 | 35659012 | 0 | 2 | 2052,83,                  | 0,5637       | -13.7 | -12   | 6.96 | -0.528 | -1.56 |
| chr3  | 1.3E+08  | 1.3E+08  | PLXND1   | 0.00098  | - | 1.3E+08  | 1.3E+08  | 0 | 1 | 100,                      | 0            | -3.01 | -2.04 | 1.78 | -0.524 | -1.55 |
| chr16 | 2948866  | 2949216  | FLYWCH1  | 2.30E-05 | + | 2948866  | 2949216  | 0 | 1 | 350,                      | 0            | -4.64 | -4.43 | 4.27 | -0.525 | -1.55 |
| chr16 | 734327   | 734677   | HAGHL    | 0.0011   | + | 734327   | 734677   | 0 | 1 | 350,                      | 0            | -2.95 | -1.99 | 3.25 | -0.524 | -1.55 |
| chr6  | 1.5E+08  | 1.5E+08  | ULBP3    | 0.00021  | - | 1.5E+08  | 1.5E+08  | 0 | 1 | 149,                      | 0            | -3.67 | -2.65 | 3.6  | -0.522 | -1.55 |
| chr9  | 1.36E+08 | 1.36E+08 | SEC16A   | 8.90E-09 | - | 1.36E+08 | 1.36E+08 | 0 | 1 | 1048,                     | 0            | -8.05 | -7.51 | 6.4  | -0.521 | -1.55 |
| chr11 | 1.34E+08 | 1.34E+08 | VPS26B   | 1.90E-07 | + | 1.34E+08 | 1.34E+08 | 0 | 1 | 149,                      | 0            | -6.73 | -6.35 | 3.1  | -0.522 | -1.55 |
| chr1  | 2.47E+08 | 2.47E+08 | CNST     | 4.00E-11 | + | 2.47E+08 | 2.47E+08 | 0 | 2 | 51,797,                   | 0,5152       | -10.4 | -9.46 | 16   | -0.525 | -1.55 |
| chr17 | 40264560 | 40273625 | WIPF2    | 3.20E-12 | + | 40264560 | 40273625 | 0 | 2 | 586,13,                   | 0,9052       | -11.5 | -10.3 | 5.22 | -0.525 | -1.55 |
| chr1  | 47433952 | 47434100 | FOXD2-AS | 0.0015   | - | 47433952 | 47434100 | 0 | 1 | 148,                      | 0            | -2.83 | -1.88 | 2.2  | -0.522 | -1.55 |
| chr11 | 1.18E+08 | 1.18E+08 | APO01267 | 4.30E-10 | + | 1.18E+08 | 1.18E+08 | 0 | 1 | 301,                      | 0            | -9.37 | -8.62 | 2.42 | -0.526 | -1.55 |
| chr5  | 1.8E+08  | 1.8E+08  | MAPK9    | 1.30E-05 | - | 1.8E+08  | 1.8E+08  | 0 | 1 | 150,                      | 0            | -4.9  | -4.68 | 2.25 | -0.517 | -1.54 |
| chr1  | 1.79E+08 | 1.79E+08 | RALGPS2  | 6.30E-17 | + | 1.79E+08 | 1.79E+08 | 0 | 3 | 83,92,475,                | 0,4647,14201 | -16.2 | -14.2 | 6.59 | -0.518 | -1.54 |
| chr11 | 68386372 | 68389890 | LRP5     | 9.80E-07 | + | 68386372 | 68389890 | 0 | 2 | 340,10,                   | 0,3508       | -6.01 | -5.7  | 3    | -0.519 | -1.54 |
| chr10 | 13630310 | 13630510 | PRPF18   | 8.10E-08 | + | 13630310 | 13630510 | 0 | 1 | 200,                      | 0            | -7.09 | -6.67 | 5    | -0.521 | -1.54 |
| chr11 | 7653353  | 7653654  | PPFIBP2  | 6.60E-07 | + | 7653353  | 7653654  | 0 | 1 | 301,                      | 0            | -6.18 | -5.85 | 6.29 | -0.517 | -1.54 |
| chr10 | 1.26E+08 | 1.26E+08 | UROS     | 1.00E-06 | - | 1.26E+08 | 1.26E+08 | 0 | 2 | 416,83,                   | 0,907        | -5.99 | -5.68 | 4.25 | -0.52  | -1.54 |
| chr8  | 1.45E+08 | 1.45E+08 | ZNF252P  | 7.20E-07 | - | 1.45E+08 | 1.45E+08 | 0 | 1 | 101,                      | 0            | -6.14 | -4.85 | 1.8  | -0.519 | -1.54 |
| chr1  | 1.46E+08 | 1.46E+08 | ANKRD34  | 4.00E-07 | - | 1.46E+08 | 1.46E+08 | 0 | 1 | 1439,                     | 0            | -6.4  | -6.06 | 5.43 | -0.52  | -1.54 |
| chr20 | 32165767 | 32166364 | TM9SF4   | 8.50E-10 | + | 32165767 | 32166364 | 0 | 1 | 597,                      | 0            | -9.07 | -8.38 | 3.13 | -0.511 | -1.53 |
| chr3  | 16377862 | 16377963 | RFTN1    | 0.0031   | - | 16377862 | 16377963 | 0 | 1 | 101,                      | 0            | -2.51 | -1.58 | 1.62 | -0.515 | -1.53 |
| chr7  | 2658424  | 2659979  | TTYH3    | 1.20E-07 | + | 2658424  | 2659979  | 0 | 3 | 35,76,40,                 | 0,515,1515   | -6.92 | -6.52 | 2    | -0.513 | -1.53 |
| chr2  | 2.19E+08 | 2.19E+08 | ANKZF1   | 6.30E-06 | + | 2.19E+08 | 2.19E+08 | 0 | 1 | 200,                      | 0            | -5.2  | -4.96 | 2.58 | -0.511 | -1.53 |
| chr15 | 74632702 | 74632902 | EDC3     | 7.20E-06 | - | 74632702 | 74632902 | 0 | 1 | 200,                      | 0            | -5.14 | -3.97 | 1.67 | -0.513 | -1.53 |
| chr2  | 49921349 | 49922199 | NRXN1    | 8.50E-10 | - | 49921349 | 49922199 | 0 | 1 | 850,                      | 0            | -9.07 | -8.38 | 6.5  | -0.515 | -1.53 |
| chr5  | 1.33E+08 | 1.33E+08 | AFF4     | 6.30E-13 | - | 1.33E+08 | 1.33E+08 | 0 | 3 | 9,918,23,                 | 0,3213,5120  | -12.2 | -10.9 | 4.82 | -0.503 | -1.52 |
| chr6  | 1.16E+08 | 1.16E+08 | DSE      | 8.30E-09 | + | 1.16E+08 | 1.16E+08 | 0 | 1 | 151,                      | 0            | -8.08 | -7.54 | 2    | -0.507 | -1.52 |
| chr1  | 1.55E+08 | 1.55E+08 | ASH1L    | 1.20E-09 | - | 1.55E+08 | 1.55E+08 | 0 | 4 | 27,742,102,70,22430,4390  |              | -8.91 | -8.25 | 8    | -0.507 | -1.52 |
| chrX  | 41215946 | 41216545 | USP9X    | 1.60E-13 | + | 41215946 | 41216545 | 0 | 1 | 599,                      | 0            | -12.8 | -11.3 | 3.24 | -0.504 | -1.52 |
| chr1  | 1.72E+08 | 1.72E+08 | PIGC     | 0.00011  | - | 1.72E+08 | 1.72E+08 | 0 | 1 | 100,                      | 0            | -3.95 | -2.9  | 1.73 | -0.507 | -1.52 |
| chr11 | 1.08E+08 | 1.08E+08 | NPAT     | 9.30E-07 | - | 1.08E+08 | 1.08E+08 | 0 | 1 | 300,                      | 0            | -6.03 | -5.72 | 3.6  | -0.506 | -1.52 |
| chr16 | 70401012 | 70423012 | ST3GAL2  | 1.10E-06 | - | 70401012 | 70423012 | 0 | 2 | 82,69,                    | 0,21931      | -5.96 | -5.66 | 2.69 | -0.503 | -1.52 |
| chr6  | 43613865 | 43614364 | POLH     | 2.50E-07 | + | 43613865 | 43614364 | 0 | 1 | 499,                      | 0            | -6.61 | -6.24 | 3.33 | -0.507 | -1.52 |
| chr19 | 10486471 | 10489242 | KEAP1    | 3.40E-09 | - | 10486471 | 10489242 | 0 | 2 | 347,51,                   | 0,2720       | -8.47 | -7.88 | 5.9  | -0.499 | -1.51 |
| chr22 | 20116136 | 20116385 | RANBP1   | 5.10E-08 | + | 20116136 | 20116385 | 0 | 1 | 249,                      | 0            | -7.29 | -6.84 | 4.9  | -0.502 | -1.51 |
| chr19 | 306136   | 306287   | MIER2    | 1.50E-09 | - | 306136   | 306287   | 0 | 1 | 151,                      | 0            | -8.82 | -8.17 | 2.62 | -0.498 | -1.51 |
| chr10 | 79293581 | 79293682 | ZMIZ1    | 0.014    | + | 79293581 | 79293682 | 0 | 1 | 101,                      | 0            | -1.84 | -1.72 | 1.57 | -0.502 | -1.51 |

|       |          |          |          |          |   |          |          |   |   |         |         |       |       |      |        |       |
|-------|----------|----------|----------|----------|---|----------|----------|---|---|---------|---------|-------|-------|------|--------|-------|
| chr6  | 43011255 | 43011354 | PPP2R5D  | 0.00011  | + | 43011255 | 43011354 | 0 | 1 | 99,     | 0       | -3.94 | -2.89 | 1.44 | -0.499 | -1.51 |
| chr5  | 59275478 | 59276028 | PDE4D    | 2.10E-08 | - | 59275478 | 59276028 | 0 | 1 | 550,    | 0       | -7.68 | -7.19 | 3.75 | -0.498 | -1.51 |
| chr6  | 97260353 | 97260654 | MMS22L   | 9.10E-07 | - | 97260353 | 97260654 | 0 | 1 | 301,    | 0       | -6.04 | -5.73 | 3.5  | -0.499 | -1.51 |
| chr9  | 1.37E+08 | 1.37E+08 | FBXW5    | 0.0036   | - | 1.37E+08 | 1.37E+08 | 0 | 1 | 100,    | 0       | -2.44 | -2.32 | 1.45 | -0.499 | -1.51 |
| chr8  | 1.23E+08 | 1.23E+08 | ZHX1     | 7.10E-05 | - | 1.23E+08 | 1.23E+08 | 0 | 2 | 175,76, | 0,2283  | -4.15 | -3.97 | 2.25 | -0.502 | -1.51 |
| chr3  | 97942365 | 97942466 | RIOX2    | 0.00014  | - | 97942365 | 97942466 | 0 | 1 | 101,    | 0       | -3.85 | -2.81 | 2    | -0.499 | -1.51 |
| chr11 | 65597954 | 65599468 | MAP3K11  | 5.40E-06 | - | 65597954 | 65599468 | 0 | 2 | 674,75, | 0,1439  | -5.27 | -5.02 | 7.4  | -0.499 | -1.51 |
| chr6  | 26637407 | 26637507 | ZNF322   | 3.20E-11 | - | 26637407 | 26637507 | 0 | 1 | 100,    | 0       | -10.5 | -9.51 | 3.71 | -0.502 | -1.51 |
| chr17 | 43144782 | 43153671 | NBR2     | 5.00E-11 | + | 43144782 | 43153671 | 0 | 2 | 331,70, | 0,8819  | -10.3 | -9.38 | 5.9  | -0.499 | -1.51 |
| chr22 | 41866997 | 41867147 | SREBF2   | 7.10E-08 | + | 41866997 | 41867147 | 0 | 1 | 150,    | 0       | -7.15 | -6.72 | 1.47 | -0.502 | -1.51 |
| chr4  | 1.51E+08 | 1.51E+08 | AC104819 | 1.30E-18 | - | 1.51E+08 | 1.51E+08 | 0 | 1 | 197,    | 0       | -17.9 | -14.7 | 4.4  | -0.501 | -1.51 |
| chr2  | 88020869 | 88021112 | AC108479 | 0.00022  | + | 88020869 | 88021112 | 0 | 1 | 243,    | 0       | -3.65 | -2.63 | 4    | -0.501 | -1.51 |
| chr2  | 2.01E+08 | 2.01E+08 | CFLAR    | 4.00E-09 | + | 2.01E+08 | 2.01E+08 | 0 | 2 | 321,30, | 0,2373  | -8.4  | -7.82 | 4.33 | -0.495 | -1.5  |
| chr14 | 92005560 | 92006109 | TRIP11   | 3.80E-08 | - | 92005560 | 92006109 | 0 | 1 | 549,    | 0       | -7.42 | -6.96 | 6    | -0.495 | -1.5  |
| chr13 | 44574010 | 44575857 | TSC22D1  | 4.40E-10 | - | 44574010 | 44575857 | 0 | 1 | 1847,   | 0       | -9.36 | -8.62 | 6.88 | -0.496 | -1.5  |
| chr17 | 39409160 | 39410603 | MED1     | 3.10E-10 | - | 39409160 | 39410603 | 0 | 1 | 1443,   | 0       | -9.51 | -8.73 | 5.29 | -0.496 | -1.5  |
| chr8  | 1.33E+08 | 1.33E+08 | PHF20L1  | 1.70E-06 | + | 1.33E+08 | 1.33E+08 | 0 | 1 | 151,    | 0       | -5.77 | -4.53 | 2.67 | -0.491 | -1.5  |
| chr15 | 72751617 | 72752017 | ADPGK    | 1.30E-11 | - | 72751617 | 72752017 | 0 | 1 | 400,    | 0       | -10.9 | -9.86 | 4.3  | -0.493 | -1.5  |
| chr3  | 52054101 | 52055875 | DUSP7    | 3.40E-07 | - | 52054101 | 52055875 | 0 | 2 | 273,26, | 0,1748  | -6.47 | -6.12 | 2.43 | -0.494 | -1.5  |
| chr15 | 74632453 | 74632603 | EDC3     | 7.20E-06 | - | 74632453 | 74632603 | 0 | 1 | 150,    | 0       | -5.14 | -4.9  | 2.91 | -0.493 | -1.5  |
| chrX  | 1.41E+08 | 1.41E+08 | LDOC1    | 1.10E-09 | - | 1.41E+08 | 1.41E+08 | 0 | 1 | 550,    | 0       | -8.96 | -8.29 | 5.13 | -0.491 | -1.5  |
| chr19 | 19201564 | 19201665 | NR2C2AP  | 0.00016  | - | 19201564 | 19201665 | 0 | 1 | 101,    | 0       | -3.8  | -3.64 | 2.8  | -0.496 | -1.5  |
| chr5  | 1.81E+08 | 1.81E+08 | AC008443 | 1.30E-05 | + | 1.81E+08 | 1.81E+08 | 0 | 1 | 250,    | 0       | -4.9  | -4.68 | 5.71 | -0.495 | -1.5  |
| chr1  | 47433460 | 47433559 | FOXD2-AS | 0.0015   | - | 47433460 | 47433559 | 0 | 1 | 99,     | 0       | -2.83 | -1.88 | 4.33 | -0.491 | -1.5  |
| chr8  | 30195419 | 30195520 | ACO26979 | 3.50E-05 | + | 30195419 | 30195520 | 0 | 1 | 101,    | 0       | -4.45 | -3.36 | 2.75 | -0.494 | -1.5  |
| chr11 | 78226642 | 78231848 | ACO26979 | 0.00013  | - | 78226642 | 78231848 | 0 | 2 | 409,40, | 0,5166  | -3.89 | -2.84 | 3.56 | -0.491 | -1.49 |
| chr14 | 92000105 | 92003965 | TRIP11   | 3.80E-08 | - | 92000105 | 92003965 | 0 | 2 | 3,547,  | 0,3313  | -7.42 | -6.96 | 5.39 | -0.486 | -1.49 |
| chr14 | 33950712 | 33950862 | EGLN3    | 1.00E-07 | - | 33950712 | 33950862 | 0 | 1 | 150,    | 0       | -6.99 | -5.59 | 2.4  | -0.488 | -1.49 |
| chr2  | 85326624 | 85326973 | TGOLN2   | 8.70E-10 | - | 85326624 | 85326973 | 0 | 1 | 349,    | 0       | -9.06 | -8.37 | 2.48 | -0.488 | -1.49 |
| chr4  | 1.69E+08 | 1.69E+08 | SH3RF1   | 0.00023  | - | 1.69E+08 | 1.69E+08 | 0 | 1 | 299,    | 0       | -3.64 | -3.48 | 6.12 | -0.488 | -1.49 |
| chr11 | 65116547 | 65116983 | ZNHIT2   | 6.30E-07 | - | 65116547 | 65116983 | 0 | 1 | 436,    | 0       | -6.2  | -5.88 | 5.57 | -0.49  | -1.49 |
| chr19 | 49149976 | 49150476 | PPFIA3   | 2.40E-08 | + | 49149976 | 49150476 | 0 | 1 | 500,    | 0       | -7.62 | -7.13 | 5.81 | -0.49  | -1.49 |
| chr8  | 28348435 | 28349128 | FBXO16   | 3.20E-11 | - | 28348435 | 28349128 | 0 | 2 | 395,4,  | 0,689   | -10.5 | -9.53 | 4.41 | -0.489 | -1.49 |
| chr19 | 19633918 | 19634068 | GMIP     | 0.00011  | - | 19633918 | 19634068 | 0 | 1 | 150,    | 0       | -3.95 | -2.9  | 2.09 | -0.483 | -1.48 |
| chr7  | 1E+08    | 1E+08    | ZKSCAN1  | 8.30E-10 | + | 1E+08    | 1E+08    | 0 | 2 | 40,310, | 0,2969  | -9.08 | -8.39 | 3.89 | -0.484 | -1.48 |
| chr12 | 63808811 | 63808912 | RXYLT1   | 6.20E-07 | + | 63808811 | 63808912 | 0 | 1 | 101,    | 0       | -6.21 | -5.88 | 2.64 | -0.483 | -1.48 |
| chr9  | 1.13E+08 | 1.13E+08 | FKBP15   | 6.80E-06 | - | 1.13E+08 | 1.13E+08 | 0 | 1 | 250,    | 0       | -5.17 | -4    | 2.5  | -0.483 | -1.48 |
| chr11 | 62614870 | 62614970 | ROM1     | 0.0017   | + | 62614870 | 62614970 | 0 | 1 | 100,    | 0       | -2.76 | -1.81 | 1.67 | -0.483 | -1.48 |
| chr16 | 30662633 | 30663065 | FBR3     | 7.60E-07 | + | 30662633 | 30663065 | 0 | 2 | 226,24, | 0,408   | -6.12 | -5.8  | 2.77 | -0.483 | -1.48 |
| chr9  | 1.36E+08 | 1.36E+08 | GPSM1    | 5.50E-06 | + | 1.36E+08 | 1.36E+08 | 0 | 2 | 55,545, | 0,1518  | -5.26 | -5.01 | 5.27 | -0.482 | -1.48 |
| chr7  | 1.02E+08 | 1.02E+08 | ORAI2    | 1.80E-08 | + | 1.02E+08 | 1.02E+08 | 0 | 1 | 200,    | 0       | -7.75 | -7.25 | 4    | -0.484 | -1.48 |
| chr3  | 1.44E+08 | 1.44E+08 | DIPK2A   | 6.30E-13 | + | 1.44E+08 | 1.44E+08 | 0 | 1 | 449,    | 0       | -12.2 | -10.9 | 7.38 | -0.483 | -1.48 |
| chr19 | 58127586 | 58127934 | ZNF329   | 2.20E-07 | - | 58127586 | 58127934 | 0 | 1 | 348,    | 0       | -6.65 | -6.28 | 5.5  | -0.485 | -1.48 |
| chr12 | 1.22E+08 | 1.22E+08 | TMEM120  | 0.00087  | + | 1.22E+08 | 1.22E+08 | 0 | 1 | 101,    | 0       | -3.06 | -2.09 | 1.6  | -0.483 | -1.48 |
| chr5  | 1.8E+08  | 1.8E+08  | TBC1D9B  | 3.30E-06 | - | 1.8E+08  | 1.8E+08  | 0 | 1 | 300,    | 0       | -5.48 | -5.22 | 2.11 | -0.483 | -1.48 |
| chr14 | 24316497 | 24316796 | LTB4R    | 0.00014  | + | 24316497 | 24316796 | 0 | 1 | 299,    | 0       | -3.86 | -3.69 | 4.75 | -0.482 | -1.48 |
| chr3  | 17160851 | 17161151 | TBC1D5   | 1.10E-05 | - | 17160851 | 17161151 | 0 | 1 | 300,    | 0       | -4.96 | -4.73 | 3.56 | -0.48  | -1.47 |
| chr5  | 1.81E+08 | 1.81E+08 | MGAT1    | 3.90E-08 | - | 1.81E+08 | 1.81E+08 | 0 | 1 | 999,    | 0       | -7.41 | -6.95 | 7.89 | -0.476 | -1.47 |
| chr4  | 1.09E+08 | 1.09E+08 | SEC24B   | 1.60E-09 | + | 1.09E+08 | 1.09E+08 | 0 | 2 | 132,18, | 0,15546 | -8.79 | -8.15 | 2.65 | -0.482 | -1.47 |
| chr15 | 77483185 | 77483532 | HMG20A   | 1.30E-06 | + | 77483185 | 77483532 | 0 | 1 | 347,    | 0       | -5.87 | -5.57 | 2.17 | -0.48  | -1.47 |
| chr11 | 62129795 | 62129895 | INCENP   | 1.20E-07 | + | 62129795 | 62129895 | 0 | 1 | 100,    | 0       | -6.91 | -6.51 | 1.27 | -0.48  | -1.47 |

|       |          |          |          |          |   |          |          |   |   |          |        |       |       |      |        |       |
|-------|----------|----------|----------|----------|---|----------|----------|---|---|----------|--------|-------|-------|------|--------|-------|
| chr1  | 52771020 | 52771568 | ZYG11B   | 1.00E-10 | + | 52771020 | 52771568 | 0 | 1 | 548,     | 0      | -10   | -9.15 | 8.7  | -0.479 | -1.47 |
| chr12 | 1.06E+08 | 1.06E+08 | TCP11L2  | 1.10E-07 | + | 1.06E+08 | 1.06E+08 | 0 | 1 | 250,     | 0      | -6.97 | -6.56 | 4.62 | -0.479 | -1.47 |
| chr3  | 1.3E+08  | 1.3E+08  | AC083799 | 0.0017   | - | 1.3E+08  | 1.3E+08  | 0 | 1 | 241,     | 0      | -2.76 | -2.63 | 6.25 | -0.48  | -1.47 |
| chr12 | 55724405 | 55724505 | AC009779 | 0.00095  | + | 55724405 | 55724505 | 0 | 1 | 100,     | 0      | -3.02 | -2.05 | 1.38 | -0.482 | -1.47 |
| chr17 | 36496031 | 36496282 | MYO19    | 7.40E-05 | - | 36496031 | 36496282 | 0 | 1 | 251,     | 0      | -4.13 | -3.96 | 5.4  | -0.477 | -1.47 |
| chr12 | 56605914 | 56606397 | BAZ2A    | 6.30E-13 | - | 56605914 | 56606397 | 0 | 2 | 149,151, | 0.332  | -12.2 | -10.9 | 3    | -0.472 | -1.46 |
| chr6  | 1.58E+08 | 1.58E+08 | SERAC1   | 0.00015  | - | 1.58E+08 | 1.58E+08 | 0 | 1 | 151,     | 0      | -3.81 | -2.78 | 3.78 | -0.472 | -1.46 |
| chrX  | 1.24E+08 | 1.24E+08 | THOC2    | 4.00E-05 | - | 1.24E+08 | 1.24E+08 | 0 | 2 | 195.6,   | 0.6644 | -4.4  | -3.31 | 2.43 | -0.472 | -1.46 |
| chr6  | 1.58E+08 | 1.58E+08 | SNX9     | 1.10E-07 | + | 1.58E+08 | 1.58E+08 | 0 | 1 | 251,     | 0      | -6.96 | -6.55 | 2    | -0.471 | -1.46 |
| chr2  | 1.49E+08 | 1.49E+08 | EPC2     | 3.00E-07 | + | 1.49E+08 | 1.49E+08 | 0 | 1 | 300,     | 0      | -6.52 | -6.17 | 3.46 | -0.475 | -1.46 |
| chr18 | 24159510 | 24159759 | CABYR    | 0.00035  | + | 24159510 | 24159759 | 0 | 1 | 249,     | 0      | -3.46 | -3.31 | 4.44 | -0.472 | -1.46 |
| chr16 | 30352752 | 30353234 | CD2BP2   | 4.20E-05 | - | 30352752 | 30353234 | 0 | 2 | 343.54,  | 0.428  | -4.38 | -4.19 | 2.44 | -0.475 | -1.46 |
| chr8  | 1.45E+08 | 1.45E+08 | ZNF16    | 1.00E-06 | - | 1.45E+08 | 1.45E+08 | 0 | 1 | 100,     | 0      | -5.98 | -4.71 | 3    | -0.471 | -1.46 |
| chr2  | 30606179 | 30606280 | LCLAT1   | 0.00026  | + | 30606179 | 30606280 | 0 | 1 | 101,     | 0      | -3.59 | -2.57 | 3    | -0.472 | -1.46 |
| chr10 | 21516052 | 21516300 | SKIDA1   | 7.90E-07 | - | 21516052 | 21516300 | 0 | 1 | 248,     | 0      | -6.1  | -5.78 | 5.18 | -0.472 | -1.46 |
| chr22 | 46231834 | 46232034 | PPARA    | 9.50E-07 | + | 46231834 | 46232034 | 0 | 1 | 200,     | 0      | -6.02 | -5.71 | 6.25 | -0.471 | -1.46 |
| chr15 | 71778237 | 71778387 | THSD4    | 5.10E-05 | + | 71778237 | 71778387 | 0 | 1 | 150,     | 0      | -4.29 | -3.21 | 1.8  | -0.472 | -1.46 |
| chr20 | 3148711  | 3149260  | FSTKD5   | 2.40E-05 | - | 3148711  | 3149260  | 0 | 1 | 549,     | 0      | -4.62 | -4.41 | 5.75 | -0.475 | -1.46 |
| chr12 | 884706   | 884857   | WAK1     | 5.20E-06 | + | 884706   | 884857   | 0 | 1 | 151,     | 0      | -5.28 | -5.02 | 1.89 | -0.471 | -1.45 |
| chr17 | 74771396 | 74771746 | NAT9     | 1.70E-06 | - | 74771396 | 74771746 | 0 | 1 | 350,     | 0      | -5.77 | -5.49 | 4.43 | -0.468 | -1.45 |
| chr4  | 1.53E+08 | 1.53E+08 | FHDC1    | 2.60E-05 | + | 1.53E+08 | 1.53E+08 | 0 | 1 | 101,     | 0      | -4.58 | -3.47 | 2.75 | -0.469 | -1.45 |
| chr6  | 82366655 | 82366855 | TPBG     | 2.50E-12 | + | 82366655 | 82366855 | 0 | 1 | 200,     | 0      | -11.6 | -9.35 | 1.56 | -0.468 | -1.45 |
| chr5  | 79512827 | 79513572 | HOMER1   | 1.00E-08 | - | 79512827 | 79513572 | 0 | 1 | 745,     | 0      | -8    | -7.47 | 5.33 | -0.468 | -1.45 |
| chr7  | 1.02E+08 | 1.02E+08 | ORAI2    | 1.80E-08 | + | 1.02E+08 | 1.02E+08 | 0 | 1 | 151,     | 0      | -7.75 | -7.25 | 1.89 | -0.471 | -1.45 |
| chr4  | 83453393 | 83455311 | HELQ     | 5.10E-08 | - | 83453393 | 83455311 | 0 | 2 | 552.43,  | 0.1875 | -7.29 | -6.84 | 5.27 | -0.469 | -1.45 |
| chr3  | 30671815 | 30672113 | TGFBR2   | 0.00025  | + | 30671815 | 30672113 | 0 | 1 | 298,     | 0      | -3.61 | -3.45 | 6.5  | -0.469 | -1.45 |
| chr2  | 2.03E+08 | 2.03E+08 | ICA1L    | 1.50E-05 | - | 2.03E+08 | 2.03E+08 | 0 | 2 | 151.50,  | 0.6420 | -4.83 | -3.69 | 2.75 | -0.468 | -1.45 |
| chr3  | 56728516 | 56728817 | ARHGFE3  | 1.60E-06 | - | 56728516 | 56728817 | 0 | 1 | 301,     | 0      | -5.79 | -4.54 | 4.4  | -0.468 | -1.45 |
| chr15 | 66493923 | 66494122 | SNAPC5   | 2.30E-07 | - | 66493923 | 66494122 | 0 | 1 | 199,     | 0      | -6.64 | -6.27 | 2.81 | -0.47  | -1.45 |
| chrX  | 1.41E+08 | 1.41E+08 | LDOC1    | 5.00E-14 | - | 1.41E+08 | 1.41E+08 | 0 | 2 | 576.11,  | 0.1060 | -13.3 | -11.7 | 4.94 | -0.467 | -1.45 |
| chr2  | 2.41E+08 | 2.41E+08 | DUSP28   | 0.00043  | + | 2.41E+08 | 2.41E+08 | 0 | 1 | 298,     | 0      | -3.37 | -2.38 | 4    | -0.471 | -1.45 |
| chr15 | 28705193 | 28705546 | GOLGA8M  | 9.30E-08 | - | 28705193 | 28705546 | 0 | 2 | 34.64,   | 0.289  | -7.03 | -5.63 | 2.67 | -0.47  | -1.45 |
| chr3  | 47870993 | 47871094 | MAP4     | 1.00E-07 | - | 47870993 | 47871094 | 0 | 1 | 101,     | 0      | -6.98 | -6.57 | 1.21 | -0.465 | -1.44 |
| chr7  | 1.52E+08 | 1.52E+08 | KMT2C    | 2.80E-08 | - | 1.52E+08 | 1.52E+08 | 0 | 1 | 1248,    | 0      | -7.55 | -7.08 | 7.62 | -0.464 | -1.44 |
| chr14 | 95103447 | 95105092 | DICER1   | 2.30E-09 | - | 95103447 | 95105092 | 0 | 2 | 679.22,  | 0.1623 | -8.63 | -8.01 | 5.17 | -0.464 | -1.44 |
| chr19 | 18531849 | 18531998 | FKBP8    | 3.00E-07 | - | 18531849 | 18531998 | 0 | 1 | 149,     | 0      | -6.52 | -6.16 | 1.54 | -0.462 | -1.44 |
| chr6  | 1.19E+08 | 1.19E+08 | MCM9     | 3.00E-08 | - | 1.19E+08 | 1.19E+08 | 0 | 1 | 1301,    | 0      | -7.53 | -7.06 | 8.5  | -0.464 | -1.44 |
| chr1  | 1.5E+08  | 1.5E+08  | PRPF3    | 2.00E-06 | + | 1.5E+08  | 1.5E+08  | 0 | 1 | 100,     | 0      | -5.7  | -5.42 | 1.5  | -0.464 | -1.44 |
| chr10 | 1.01E+08 | 1.01E+08 | SLF2     | 1.60E-11 | + | 1.01E+08 | 1.01E+08 | 0 | 1 | 100,     | 0      | -10.8 | -9.77 | 1.79 | -0.463 | -1.44 |
| chr13 | 40933320 | 40941211 | ELF1     | 1.10E-08 | - | 40933320 | 40941211 | 0 | 2 | 708.291, | 0.7600 | -7.94 | -7.42 | 9.08 | -0.465 | -1.44 |
| chr9  | 1.28E+08 | 1.28E+08 | CDK9     | 1.50E-10 | + | 1.28E+08 | 1.28E+08 | 0 | 1 | 650,     | 0      | -9.81 | -8.98 | 4.7  | -0.464 | -1.44 |
| chr16 | 88814230 | 88818060 | GALNS    | 8.50E-08 | - | 88814230 | 88818060 | 0 | 2 | 295.54,  | 0.3776 | -7.07 | -6.66 | 4    | -0.464 | -1.44 |
| chrX  | 38804891 | 38805739 | MID1IP1  | 1.90E-06 | + | 38804891 | 38805739 | 0 | 1 | 848,     | 0      | -5.71 | -5.43 | 4.14 | -0.464 | -1.44 |
| chr5  | 1.19E+08 | 1.19E+08 | DMXL1    | 1.80E-06 | + | 1.19E+08 | 1.19E+08 | 0 | 1 | 101,     | 0      | -5.75 | -4.51 | 4    | -0.463 | -1.44 |
| chr21 | 41990861 | 41991757 | ZBTB21   | 4.00E-09 | - | 41990861 | 41991757 | 0 | 1 | 896,     | 0      | -8.4  | -7.82 | 13.6 | -0.462 | -1.44 |
| chr3  | 57556920 | 57557418 | PDE12    | 1.00E-08 | + | 57556920 | 57557418 | 0 | 1 | 498,     | 0      | -7.98 | -7.45 | 4.13 | -0.463 | -1.44 |
| chr9  | 1.37E+08 | 1.37E+08 | GRIN1    | 0.0045   | + | 1.37E+08 | 1.37E+08 | 0 | 1 | 299,     | 0      | -2.35 | -2.23 | 2.67 | -0.465 | -1.44 |
| chr9  | 86945858 | 86945959 | GAS1     | 1.00E-05 | - | 86945858 | 86945959 | 0 | 1 | 101,     | 0      | -4.99 | -3.84 | 2.8  | -0.462 | -1.44 |
| chr22 | 23263562 | 23264060 | FBXW4P1  | 2.60E-05 | + | 23263562 | 23264060 | 0 | 1 | 498,     | 0      | -4.59 | -3.48 | 6.75 | -0.465 | -1.44 |
| chr2  | 2.01E+08 | 2.01E+08 | CFLAR    | 1.00E-05 | + | 2.01E+08 | 2.01E+08 | 0 | 1 | 151,     | 0      | -4.99 | -3.84 | 4.83 | -0.458 | -1.43 |
| chr14 | 68874641 | 68875041 | ACTN1    | 1.80E-09 | - | 68874641 | 68875041 | 0 | 1 | 400,     | 0      | -8.75 | -8.11 | 3.22 | -0.458 | -1.43 |

|       |          |          |          |          |   |          |          |   |   |             |            |       |       |      |        |       |
|-------|----------|----------|----------|----------|---|----------|----------|---|---|-------------|------------|-------|-------|------|--------|-------|
| chr20 | 62671891 | 62672042 | SLCO4A1  | 0.006    | + | 62671891 | 62672042 | 0 | 1 | 151,        | 0          | -2.22 | -2.1  | 2.2  | -0.457 | -1.43 |
| chr1  | 2.37E+08 | 2.37E+08 | MTR      | 0.00011  | + | 2.37E+08 | 2.37E+08 | 0 | 1 | 101,        | 0          | -3.94 | -3.77 | 1.55 | -0.458 | -1.43 |
| chr9  | 92846222 | 92846920 | ZNF484   | 1.70E-08 | - | 92846222 | 92846920 | 0 | 1 | 698,        | 0          | -7.78 | -7.28 | 6.57 | -0.459 | -1.43 |
| chr21 | 14373833 | 14375744 | HSPA13   | 3.20E-14 | - | 14373833 | 14375744 | 0 | 2 | 451,93,     | 0,1818     | -13.5 | -11.8 | 9.5  | -0.46  | -1.43 |
| chr4  | 1.18E+08 | 1.18E+08 | PRSS12   | 0.00018  | - | 1.18E+08 | 1.18E+08 | 0 | 1 | 250,        | 0          | -3.74 | -2.71 | 7.5  | -0.459 | -1.43 |
| chr4  | 1.25E+08 | 1.25E+08 | FAT4     | 0.00055  | + | 1.25E+08 | 1.25E+08 | 0 | 1 | 151,        | 0          | -3.26 | -2.27 | 6.75 | -0.461 | -1.43 |
| chr19 | 48922825 | 48923074 | NUCB1    | 4.50E-08 | + | 48922825 | 48923074 | 0 | 1 | 249,        | 0          | -7.35 | -6.9  | 2.47 | -0.456 | -1.42 |
| chr7  | 43631561 | 43631861 | COA1     | 1.30E-05 | - | 43631561 | 43631861 | 0 | 1 | 300,        | 0          | -4.9  | -4.67 | 4.11 | -0.452 | -1.42 |
| chr1  | 1.48E+08 | 1.48E+08 | BCL9     | 3.00E-08 | + | 1.48E+08 | 1.48E+08 | 0 | 1 | 898,        | 0          | -7.52 | -7.05 | 6.3  | -0.454 | -1.42 |
| chr16 | 67163675 | 67164173 | FBXL8    | 2.40E-05 | + | 67163675 | 67164173 | 0 | 1 | 498,        | 0          | -4.62 | -4.42 | 5.4  | -0.455 | -1.42 |
| chr19 | 44236258 | 44274780 | ZNF235   | 1.70E-08 | - | 44236258 | 44274780 | 0 | 2 | 471,29,     | 0,38493    | -7.77 | -6.25 | 3.29 | -0.451 | -1.42 |
| chr5  | 80143340 | 80143590 | SERINC5  | 0.00013  | 0 | 80143340 | 80143590 | 0 | 1 | 250,        | 0          | -3.9  | -2.86 | 2.8  | -0.456 | -1.42 |
| chr4  | 1.43E+08 | 1.43E+08 | USP38    | 1.40E-10 | + | 1.43E+08 | 1.43E+08 | 0 | 1 | 999,        | 0          | -9.86 | -9.01 | 6.21 | -0.454 | -1.42 |
| chr19 | 52798353 | 52799847 | ZNF28    | 1.70E-08 | - | 52798353 | 52799847 | 0 | 1 | 1494,       | 0          | -7.78 | -7.28 | 8.17 | -0.452 | -1.42 |
| chr2  | 2.31E+08 | 2.31E+08 | C2orf72  | 5.40E-06 | + | 2.31E+08 | 2.31E+08 | 0 | 1 | 299,        | 0          | -5.27 | -4.09 | 7.6  | -0.453 | -1.42 |
| chr15 | 73740010 | 73751289 | INSYN1   | 3.10E-09 | - | 73740010 | 73751289 | 0 | 2 | 632,315,    | 0,10964    | -8.51 | -7.91 | 10.3 | -0.451 | -1.42 |
| chr16 | 67542127 | 67542975 | RIPOR1   | 6.30E-13 | + | 67542127 | 67542975 | 0 | 1 | 848,        | 0          | -12.2 | -10.9 | 3.71 | -0.45  | -1.41 |
| chr12 | 1.2E+08  | 1.2E+08  | PXN      | 4.80E-05 | - | 1.2E+08  | 1.2E+08  | 0 | 1 | 498,        | 0          | -4.32 | -4.13 | 3.61 | -0.447 | -1.41 |
| chr17 | 78971534 | 78972676 | LGALS3BP | 1.40E-10 | - | 78971534 | 78972676 | 0 | 1 | 1142,       | 0          | -9.84 | -9.01 | 5.63 | -0.448 | -1.41 |
| chr12 | 12717805 | 12718858 | CDKN1B   | 1.10E-10 | + | 12717805 | 12718858 | 0 | 2 | 509,34,     | 0,1019     | -9.95 | -9.09 | 3.48 | -0.448 | -1.41 |
| chr5  | 1.77E+08 | 1.77E+08 | DBN1     | 4.50E-09 | - | 1.77E+08 | 1.77E+08 | 0 | 3 | 261,171,65, | 0,651,1156 | -8.35 | -7.77 | 2.59 | -0.447 | -1.41 |
| chr15 | 80754728 | 80754927 | ABHD17C  | 3.70E-06 | + | 80754728 | 80754927 | 0 | 1 | 199,        | 0          | -5.43 | -4.22 | 1.71 | -0.447 | -1.41 |
| chr2  | 2.01E+08 | 2.01E+08 | SGO2     | 1.40E-08 | + | 2.01E+08 | 2.01E+08 | 0 | 1 | 650,        | 0          | -7.86 | -7.35 | 6.12 | -0.45  | -1.41 |
| chr19 | 23361799 | 23362000 | ZNF91    | 5.40E-10 | - | 23361799 | 23362000 | 0 | 1 | 201,        | 0          | -9.27 | -7.5  | 2.25 | -0.449 | -1.41 |
| chr9  | 1.34E+08 | 1.34E+08 | BRD3     | 2.90E-06 | - | 1.34E+08 | 1.34E+08 | 0 | 2 | 145,105,    | 0,1635     | -5.54 | -5.27 | 2.22 | -0.451 | -1.41 |
| chr12 | 1.18E+08 | 1.18E+08 | KSR2     | 1.40E-05 | - | 1.18E+08 | 1.18E+08 | 0 | 1 | 301,        | 0          | -4.85 | -3.71 | 3.5  | -0.449 | -1.41 |
| chr19 | 9412710  | 9413410  | ZNF266   | 1.30E-10 | - | 9412710  | 9413410  | 0 | 1 | 700,        | 0          | -9.89 | -9.04 | 7.44 | -0.449 | -1.41 |
| chr17 | 6628144  | 6634788  | KIAA0753 | 1.80E-07 | - | 6628144  | 6634788  | 0 | 2 | 597,48,     | 0,6596     | -6.75 | -6.37 | 3.33 | -0.447 | -1.41 |
| chr5  | 1.41E+08 | 1.41E+08 | ANKHD1-I | 4.90E-10 | + | 1.41E+08 | 1.41E+08 | 0 | 1 | 501,        | 0          | -9.31 | -8.58 | 5.71 | -0.449 | -1.41 |
| chr7  | 39951718 | 39951869 | CDK13    | 1.60E-12 | + | 39951718 | 39951869 | 0 | 1 | 151,        | 0          | -11.8 | -10.5 | 2.91 | -0.444 | -1.4  |
| chr22 | 49823590 | 49824241 | BRD1     | 2.80E-09 | - | 49823590 | 49824241 | 0 | 1 | 651,        | 0          | -8.55 | -7.95 | 5.94 | -0.445 | -1.4  |
| chr17 | 46170958 | 46171808 | KANSL1   | 5.40E-10 | - | 46170958 | 46171808 | 0 | 1 | 850,        | 0          | -9.27 | -8.55 | 7.5  | -0.447 | -1.4  |
| chr19 | 6210479  | 6211374  | MLLT1    | 3.50E-05 | - | 6210479  | 6211374  | 0 | 1 | 895,        | 0          | -4.45 | -4.25 | 7.13 | -0.447 | -1.4  |
| chr15 | 40622346 | 40623247 | KNL1     | 2.00E-07 | + | 40622346 | 40623247 | 0 | 1 | 901,        | 0          | -6.69 | -6.32 | 4.83 | -0.447 | -1.4  |
| chr21 | 44849833 | 44850282 | PTTG1IP  | 2.20E-08 | - | 44849833 | 44850282 | 0 | 1 | 449,        | 0          | -7.66 | -7.17 | 4.2  | -0.445 | -1.4  |
| chr19 | 52840499 | 52840798 | ZNF468   | 2.10E-07 | - | 52840499 | 52840798 | 0 | 1 | 299,        | 0          | -6.67 | -6.3  | 4.2  | -0.446 | -1.4  |
| chrX  | 21856861 | 21857162 | MBTPS2   | 0.00013  | + | 21856861 | 21857162 | 0 | 1 | 301,        | 0          | -3.87 | -2.83 | 3.83 | -0.44  | -1.39 |
| chr3  | 1.5E+08  | 1.5E+08  | WWTR1    | 1.70E-07 | - | 1.5E+08  | 1.5E+08  | 0 | 2 | 117,33,     | 0,3150     | -6.77 | -6.39 | 1.55 | -0.438 | -1.39 |
| chr16 | 68226522 | 68226672 | NFATC3   | 0.0022   | + | 68226522 | 68226672 | 0 | 1 | 150,        | 0          | -2.66 | -2.53 | 1.39 | -0.438 | -1.39 |
| chr20 | 4856740  | 4859324  | SLC23A2  | 2.40E-08 | - | 4856740  | 4859324  | 0 | 2 | 464,36,     | 0,2548     | -7.62 | -7.14 | 5.59 | -0.436 | -1.39 |
| chr9  | 98124451 | 98126642 | CORO2A   | 5.60E-06 | - | 98124451 | 98126642 | 0 | 2 | 454,94,     | 0,2097     | -5.25 | -5    | 8.4  | -0.438 | -1.39 |
| chr1  | 1315032  | 1315481  | INTS11   | 3.00E-06 | - | 1315032  | 1315481  | 0 | 1 | 449,        | 0          | -5.53 | -5.26 | 6.29 | -0.436 | -1.39 |
| chr1  | 1.81E+08 | 1.81E+08 | STX6     | 1.60E-12 | - | 1.81E+08 | 1.81E+08 | 0 | 2 | 548,51,     | 0,8578     | -11.8 | -10.5 | 9.46 | -0.439 | -1.39 |
| chr4  | 76740506 | 76740706 | SHROOM3  | 1.50E-06 | + | 76740506 | 76740706 | 0 | 1 | 200,        | 0          | -5.82 | -5.52 | 2.85 | -0.436 | -1.39 |
| chr17 | 82601349 | 82602448 | FOXK2    | 6.30E-12 | + | 82601349 | 82602448 | 0 | 1 | 1099,       | 0          | -11.2 | -10.1 | 8.24 | -0.438 | -1.39 |
| chr5  | 1.16E+08 | 1.16E+08 | ATG12    | 8.70E-07 | - | 1.16E+08 | 1.16E+08 | 0 | 2 | 31,70,      | 0,2497     | -6.06 | -4.78 | 1.88 | -0.439 | -1.39 |
| chr1  | 77942097 | 77942699 | NEXN     | 4.30E-05 | + | 77942097 | 77942699 | 0 | 2 | 111,239,    | 0,363      | -4.37 | -4.18 | 3.55 | -0.436 | -1.39 |
| chr1  | 40514561 | 40515160 | EXO5     | 0.00052  | + | 40514561 | 40515160 | 0 | 1 | 599,        | 0          | -3.28 | -2.29 | 4.67 | -0.439 | -1.39 |
| chr3  | 9470518  | 9470868  | SETD5    | 7.20E-08 | + | 9470518  | 9470868  | 0 | 1 | 350,        | 0          | -7.14 | -6.72 | 3.68 | -0.438 | -1.39 |
| chr18 | 63127133 | 63127782 | BCL2     | 9.30E-08 | - | 63127133 | 63127782 | 0 | 1 | 649,        | 0          | -7.03 | -6.62 | 7.38 | -0.439 | -1.39 |
| chr22 | 17788845 | 17789343 | ACO16026 | 1.40E-06 | - | 17788845 | 17789343 | 0 | 1 | 498,        | 0          | -5.86 | -5.56 | 3.5  | -0.434 | -1.38 |

|       |          |          |           |          |   |          |          |   |   |             |               |       |       |      |        |       |
|-------|----------|----------|-----------|----------|---|----------|----------|---|---|-------------|---------------|-------|-------|------|--------|-------|
| chr19 | 47496872 | 47497023 | NAPA      | 8.90E-07 | - | 47496872 | 47497023 | 0 | 1 | 151,        | 0             | -6.05 | -4.78 | 7    | -0.434 | -1.38 |
| chr4  | 1.03E+08 | 1.03E+08 | UBE2D3    | 4.50E-09 | - | 1.03E+08 | 1.03E+08 | 0 | 2 | 280,21,     | 0,1747        | -8.35 | -7.77 | 2.5  | -0.433 | -1.38 |
| chr4  | 1.9E+08  | 1.9E+08  | FRG1      | 2.50E-06 | + | 1.9E+08  | 1.9E+08  | 0 | 2 | 56,43,      | 0,78          | -5.6  | -5.32 | 1.26 | -0.433 | -1.38 |
| chr9  | 35661724 | 35661973 | ARHGGEF39 | 1.10E-05 | - | 35661724 | 35661973 | 0 | 1 | 249,        | 0             | -4.96 | -4.73 | 3.58 | -0.433 | -1.38 |
| chr15 | 31372045 | 31372744 | KLF13     | 5.00E-12 | + | 31372045 | 31372744 | 0 | 1 | 699,        | 0             | -11.3 | -10.1 | 13.8 | -0.434 | -1.38 |
| chr13 | 20702622 | 20704090 | IL17D     | 2.70E-06 | + | 20702622 | 20704090 | 0 | 3 | 698,102,95, | 0,720,1373    | -5.57 | -5.29 | 7    | -0.434 | -1.38 |
| chr19 | 34740753 | 34741450 | ZNF181    | 3.70E-07 | + | 34740753 | 34741450 | 0 | 1 | 697,        | 0             | -6.43 | -6.08 | 6.5  | -0.434 | -1.38 |
| chr1  | 40514556 | 40515009 | AL603839. | 5.00E-14 | - | 40514556 | 40515009 | 0 | 2 | 78,210,     | 0,243         | -13.3 | -10.6 | 4    | -0.434 | -1.38 |
| chr3  | 1.86E+08 | 1.86E+08 | ETV5      | 1.20E-06 | - | 1.86E+08 | 1.86E+08 | 0 | 1 | 299,        | 0             | -5.91 | -5.61 | 2.7  | -0.435 | -1.38 |
| chr11 | 1.02E+08 | 1.02E+08 | BIRC3     | 4.50E-05 | + | 1.02E+08 | 1.02E+08 | 0 | 1 | 100,        | 0             | -4.35 | -3.26 | 2.29 | -0.43  | -1.37 |
| chr16 | 50751659 | 50751809 | CYLD      | 7.20E-07 | + | 50751659 | 50751809 | 0 | 1 | 150,        | 0             | -6.14 | -5.82 | 5    | -0.429 | -1.37 |
| chr14 | 22611031 | 22611131 | ABHD4     | 6.60E-06 | + | 22611031 | 22611131 | 0 | 1 | 100,        | 0             | -5.18 | -4.94 | 3    | -0.428 | -1.37 |
| chr20 | 50891112 | 50892261 | ADNP      | 1.30E-09 | - | 50891112 | 50892261 | 0 | 1 | 1149,       | 0             | -8.87 | -8.21 | 10.5 | -0.43  | -1.37 |
| chr2  | 1.05E+08 | 1.05E+08 | TGFBRAP1  | 2.00E-07 | - | 1.05E+08 | 1.05E+08 | 0 | 1 | 249,        | 0             | -6.7  | -6.32 | 2    | -0.432 | -1.37 |
| chr19 | 46920624 | 46921574 | ARHGAP3   | 6.90E-10 | + | 46920624 | 46921574 | 0 | 1 | 950,        | 0             | -9.16 | -8.46 | 3.67 | -0.431 | -1.37 |
| chr16 | 4113895  | 4114644  | ADCY9     | 3.50E-06 | - | 4113895  | 4114644  | 0 | 1 | 749,        | 0             | -5.46 | -5.19 | 5.16 | -0.428 | -1.37 |
| chr8  | 42437166 | 42437565 | SLC20A2   | 2.70E-07 | - | 42437166 | 42437565 | 0 | 1 | 399,        | 0             | -6.57 | -6.21 | 4.91 | -0.431 | -1.37 |
| chr4  | 1.84E+08 | 1.84E+08 | STOX2     | 2.20E-05 | + | 1.84E+08 | 1.84E+08 | 0 | 1 | 300,        | 0             | -4.66 | -4.45 | 4.67 | -0.431 | -1.37 |
| chr13 | 1.14E+08 | 1.14E+08 | CHAMP1    | 3.20E-16 | + | 1.14E+08 | 1.14E+08 | 0 | 1 | 598,        | 0             | -15.5 | -13.5 | 10.2 | -0.429 | -1.37 |
| chr6  | 30198804 | 30199104 | TRIM26    | 1.00E-06 | - | 30198804 | 30199104 | 0 | 1 | 300,        | 0             | -5.98 | -5.68 | 3    | -0.427 | -1.37 |
| chr12 | 1.23E+08 | 1.23E+08 | PITPNM2   | 0.00037  | - | 1.23E+08 | 1.23E+08 | 0 | 1 | 101,        | 0             | -3.43 | -2.43 | 1.67 | -0.422 | -1.36 |
| chr20 | 63287603 | 63289542 | ARFGAP1   | 4.00E-12 | + | 63287603 | 63289542 | 0 | 1 | 1939,       | 0             | -11.4 | -10.3 | 9.44 | -0.422 | -1.36 |
| chr9  | 1.36E+08 | 1.36E+08 | CAMSAP1   | 3.50E-07 | - | 1.36E+08 | 1.36E+08 | 0 | 1 | 250,        | 0             | -6.46 | -6.11 | 4.4  | -0.425 | -1.36 |
| chr3  | 1.38E+08 | 1.38E+08 | MRAS      | 6.30E-05 | + | 1.38E+08 | 1.38E+08 | 0 | 1 | 200,        | 0             | -4.2  | -3.13 | 2    | -0.426 | -1.36 |
| chr11 | 76463984 | 76472568 | EMSY      | 1.00E-04 | + | 76463984 | 76472568 | 0 | 2 | 96,5,       | 0,8579        | -3.99 | -2.94 | 2.23 | -0.424 | -1.36 |
| chr1  | 77933391 | 77941749 | NEXN      | 5.50E-05 | + | 77933391 | 77941749 | 0 | 3 | 88,222,39,  | 0,2431,8319   | -4.26 | -4.08 | 3.67 | -0.425 | -1.36 |
| chr10 | 1.17E+08 | 1.17E+08 | PDZD8     | 3.20E-11 | - | 1.17E+08 | 1.17E+08 | 0 | 1 | 2240,       | 0             | -10.5 | -9.5  | 7.93 | -0.423 | -1.36 |
| chr15 | 79412909 | 79413260 | TMED3     | 9.30E-06 | + | 79412909 | 79413260 | 0 | 1 | 351,        | 0             | -5.03 | -3.87 | 6.6  | -0.425 | -1.36 |
| chr16 | 15636013 | 15636163 | MARF1     | 0.00021  | - | 15636013 | 15636163 | 0 | 1 | 150,        | 0             | -3.67 | -3.51 | 2.71 | -0.425 | -1.36 |
| chr4  | 53365668 | 53365768 | SCFD2     | 6.60E-07 | - | 53365668 | 53365768 | 0 | 1 | 100,        | 0             | -6.18 | -4.89 | 2.33 | -0.424 | -1.36 |
| chr11 | 1.19E+08 | 1.19E+08 | USP2      | 1.30E-05 | - | 1.19E+08 | 1.19E+08 | 0 | 2 | 615,32,     | 0,879         | -4.88 | -4.65 | 7.4  | -0.419 | -1.35 |
| chr15 | 73302658 | 73302959 | NEO1      | 1.30E-09 | + | 73302658 | 73302959 | 0 | 1 | 301,        | 0             | -8.9  | -8.24 | 5.42 | -0.417 | -1.35 |
| chr22 | 20997287 | 20997886 | LZTR1     | 7.20E-08 | + | 20997287 | 20997886 | 0 | 1 | 599,        | 0             | -7.14 | -6.72 | 6.75 | -0.418 | -1.35 |
| chr22 | 29788906 | 29789056 | ASCC2     | 5.90E-06 | - | 29788906 | 29789056 | 0 | 1 | 150,        | 0             | -5.23 | -4.98 | 1.75 | -0.417 | -1.35 |
| chr4  | 48852063 | 48852461 | OCIAD1    | 5.50E-08 | + | 48852063 | 48852461 | 0 | 1 | 398,        | 0             | -7.26 | -6.82 | 4.5  | -0.416 | -1.35 |
| chr9  | 1.14E+08 | 1.14E+08 | RGS3      | 0.00087  | + | 1.14E+08 | 1.14E+08 | 0 | 1 | 151,        | 0             | -3.06 | -2.09 | 4    | -0.417 | -1.35 |
| chr12 | 1.1E+08  | 1.1E+08  | GIT2      | 3.60E-05 | - | 1.1E+08  | 1.1E+08  | 0 | 1 | 401,        | 0             | -4.44 | -4.24 | 6.4  | -0.419 | -1.35 |
| chr2  | 2.19E+08 | 2.19E+08 | CNOT9     | 5.50E-10 | + | 2.19E+08 | 2.19E+08 | 0 | 1 | 499,        | 0             | -9.26 | -8.54 | 4.1  | -0.419 | -1.35 |
| chr9  | 1.3E+08  | 1.3E+08  | ASB6      | 3.70E-06 | - | 1.3E+08  | 1.3E+08  | 0 | 2 | 78,72,      | 0,193         | -5.43 | -5.17 | 2.25 | -0.419 | -1.35 |
| chr11 | 1.08E+08 | 1.08E+08 | NPAT      | 9.30E-07 | - | 1.08E+08 | 1.08E+08 | 0 | 1 | 101,        | 0             | -6.03 | -4.76 | 2.5  | -0.418 | -1.35 |
| chr20 | 36793491 | 36794240 | SOGA1     | 2.10E-09 | - | 36793491 | 36794240 | 0 | 1 | 749,        | 0             | -8.68 | -8.05 | 4.86 | -0.416 | -1.35 |
| chr3  | 48158781 | 48159388 | CDC25A    | 5.20E-06 | - | 48158781 | 48159388 | 0 | 2 | 304,45,     | 0,562         | -5.28 | -5.03 | 6.85 | -0.418 | -1.35 |
| chr16 | 265732   | 265933   | FAM234A   | 6.30E-06 | + | 265732   | 265933   | 0 | 1 | 201,        | 0             | -5.2  | -4.95 | 2.62 | -0.417 | -1.35 |
| chr4  | 1.05E+08 | 1.05E+08 | TET2      | 4.30E-10 | + | 1.05E+08 | 1.05E+08 | 0 | 1 | 1449,       | 0             | -9.37 | -8.63 | 7.92 | -0.416 | -1.35 |
| chr1  | 28473641 | 28473991 | PHACTR4   | 5.50E-07 | + | 28473641 | 28473991 | 0 | 1 | 350,        | 0             | -6.26 | -5.93 | 5    | -0.419 | -1.35 |
| chr1  | 15659966 | 15661722 | RSC1A1    | 1.00E-80 | + | 15659966 | 15661722 | 0 | 1 | 1756,       | 0             | -80   | -76.6 | 9.5  | -0.419 | -1.35 |
| chr1  | 3739398  | 3740096  | TP73-AS1  | 2.70E-07 | - | 3739398  | 3740096  | 0 | 1 | 698,        | 0             | -6.57 | -6.21 | 2.12 | -0.419 | -1.35 |
| chr4  | 1.04E+08 | 1.05E+08 | CXXC4-AS  | 8.30E-08 | + | 1.04E+08 | 1.05E+08 | 0 | 3 | 112,59,29,  | 0,146949,147! | -7.08 | -6.66 | 2.13 | -0.419 | -1.35 |
| chr1  | 1.56E+08 | 1.56E+08 | AL353807. | 2.50E-11 | - | 1.56E+08 | 1.56E+08 | 0 | 1 | 492,        | 0             | -10.6 | -9.65 | 3.62 | -0.416 | -1.35 |
| chrX  | 2881480  | 2881828  | GYG2      | 1.00E-05 | + | 2881480  | 2881828  | 0 | 1 | 348,        | 0             | -4.98 | -4.75 | 3.76 | -0.412 | -1.34 |
| chr20 | 46366849 | 46367149 | ELMO2     | 2.90E-10 | - | 46366849 | 46367149 | 0 | 1 | 300,        | 0             | -9.54 | -8.76 | 4.14 | -0.416 | -1.34 |

|       |          |          |          |          |   |          |          |   |   |                           |             |   |       |       |      |        |       |
|-------|----------|----------|----------|----------|---|----------|----------|---|---|---------------------------|-------------|---|-------|-------|------|--------|-------|
| chr2  | 2.1E+08  | 2.1E+08  | MAP2     | 6.30E-06 | + | 2.1E+08  | 2.1E+08  | 0 | 2 | 618,31,                   | 0,809       |   | -5.2  | -4.95 | 3.5  | -0.416 | -1.34 |
| chr5  | 1.42E+08 | 1.42E+08 | DELE1    | 2.20E-08 | + | 1.42E+08 | 1.42E+08 | 0 | 1 | 401,                      |             | 0 | -7.65 | -7.16 | 2.82 | -0.412 | -1.34 |
| chr15 | 48738298 | 48738797 | CEP152   | 6.50E-09 | - | 48738298 | 48738797 | 0 | 1 | 499,                      |             | 0 | -8.19 | -7.64 | 8.6  | -0.416 | -1.34 |
| chr17 | 35578272 | 35578421 | PEX12    | 0.0013   | - | 35578272 | 35578421 | 0 | 1 | 149,                      |             | 0 | -2.9  | -1.94 | 2    | -0.414 | -1.34 |
| chr1  | 2.11E+08 | 2.11E+08 | RCOR3    | 6.30E-11 | + | 2.11E+08 | 2.11E+08 | 0 | 1 | 450,                      |             | 0 | -10.2 | -9.25 | 5.19 | -0.415 | -1.34 |
| chr1  | 52033386 | 52033587 | TXNDC12  | 9.50E-05 | - | 52033386 | 52033587 | 0 | 1 | 201,                      |             | 0 | -4.02 | -3.85 | 2.4  | -0.412 | -1.34 |
| chr14 | 77025385 | 77026626 | IRF2BPL  | 7.60E-09 | - | 77025385 | 77026626 | 0 | 1 | 1241,                     |             | 0 | -8.12 | -7.57 | 7    | -0.413 | -1.34 |
| chr1  | 2.45E+08 | 2.45E+08 | DESI2    | 2.60E-08 | + | 2.45E+08 | 2.45E+08 | 0 | 1 | 400,                      |             | 0 | -7.58 | -7.1  | 4.65 | -0.415 | -1.34 |
| chr11 | 72012990 | 72013840 | NUMA1    | 7.90E-12 | - | 72012990 | 72013840 | 0 | 1 | 850,                      |             | 0 | -11.1 | -9.97 | 2.4  | -0.412 | -1.34 |
| chr15 | 54014968 | 54015069 | UNC13C   | 5.50E-06 | + | 54014968 | 54015069 | 0 | 1 | 101,                      |             | 0 | -5.26 | -5.01 | 1.74 | -0.415 | -1.34 |
| chr12 | 45927528 | 45928478 | SCAF11   | 6.80E-10 | - | 45927528 | 45928478 | 0 | 1 | 950,                      |             | 0 | -9.17 | -8.47 | 3.86 | -0.416 | -1.34 |
| chr19 | 50044802 | 50044903 | ZNF473   | 3.70E-07 | + | 50044802 | 50044903 | 0 | 1 | 101,                      |             | 0 | -6.43 | -6.09 | 2    | -0.415 | -1.34 |
| chr9  | 14120546 | 14125703 | NFIB     | 9.10E-05 | - | 14120546 | 14125703 | 0 | 2 | 78,72,                    | 0,5085      |   | -4.04 | -3.87 | 3.5  | -0.415 | -1.34 |
| chr4  | 1.83E+08 | 1.83E+08 | WWC2     | 8.10E-06 | + | 1.83E+08 | 1.83E+08 | 0 | 1 | 250,                      |             | 0 | -5.09 | -4.85 | 2.29 | -0.415 | -1.34 |
| chr3  | 1E+08    | 1E+08    | TOMM70   | 2.00E-05 | - | 1E+08    | 1E+08    | 0 | 2 | 242,8,                    | 0,2568      |   | -4.69 | -4.48 | 4.29 | -0.414 | -1.34 |
| chr4  | 2328895  | 2329096  | ZFYVE28  | 0.00083  | - | 2328895  | 2329096  | 0 | 1 | 201,                      |             | 0 | -3.08 | -2.11 | 3.8  | -0.415 | -1.34 |
| chr9  | 1.01E+08 | 1.01E+08 | TMEM246  | 2.60E-08 | - | 1.01E+08 | 1.01E+08 | 0 | 1 | 801,                      |             | 0 | -7.58 | -7.1  | 5.89 | -0.415 | -1.34 |
| chr15 | 41711298 | 41713449 | MGA      | 1.00E-06 | + | 41711298 | 41713449 | 0 | 2 | 51,299,                   | 0,1852      |   | -6    | -5.7  | 3.23 | -0.416 | -1.34 |
| chr9  | 5919871  | 5920322  | KIAA2026 | 3.20E-05 | - | 5919871  | 5920322  | 0 | 1 | 451,                      |             | 0 | -4.49 | -4.29 | 5    | -0.412 | -1.34 |
| chr9  | 38621992 | 38622193 | FAM201A  | 9.30E-08 | + | 38621992 | 38622193 | 0 | 1 | 201,                      |             | 0 | -7.03 | -5.63 | 4.2  | -0.415 | -1.34 |
| chr17 | 40363197 | 40364195 | AC080112 | 3.90E-08 | + | 40363197 | 40364195 | 0 | 1 | 998,                      |             | 0 | -7.41 | -6.95 | 4.8  | -0.416 | -1.34 |
| chr20 | 63738806 | 63738904 | AL121845 | 7.90E-12 | + | 63738806 | 63738904 | 0 | 1 | 98,                       |             | 0 | -11.1 | -8.92 | 2.86 | -0.412 | -1.34 |
| chr18 | 9536765  | 9536866  | RALBP1   | 7.10E-10 | + | 9536765  | 9536866  | 0 | 1 | 101,                      |             | 0 | -9.15 | -8.45 | 1.67 | -0.411 | -1.33 |
| chr13 | 95791394 | 95791744 | DNAJC3   | 1.20E-07 | + | 95791394 | 95791744 | 0 | 1 | 350,                      |             | 0 | -6.92 | -6.52 | 3.14 | -0.411 | -1.33 |
| chr6  | 1.5E+08  | 1.5E+08  | ULBP1    | 0.00024  | + | 1.5E+08  | 1.5E+08  | 0 | 1 | 149,                      |             | 0 | -3.62 | -2.61 | 3.5  | -0.408 | -1.33 |
| chr6  | 20488202 | 20490670 | E2F3     | 2.40E-08 | + | 20488202 | 20490670 | 0 | 2 | 46,503,                   | 0,1965      |   | -7.62 | -7.14 | 9.33 | -0.408 | -1.33 |
| chr9  | 1.12E+08 | 1.12E+08 | PTBP3    | 0.00038  | - | 1.12E+08 | 1.12E+08 | 0 | 2 | 227,24,                   | 0,376       |   | -3.42 | -3.27 | 6    | -0.411 | -1.33 |
| chr1  | 52897455 | 52897755 | ECHDC2   | 4.20E-07 | - | 52897455 | 52897755 | 0 | 1 | 300,                      |             | 0 | -6.38 | -6.04 | 4.5  | -0.408 | -1.33 |
| chr20 | 41174491 | 41175092 | PLCG1    | 3.90E-10 | + | 41174491 | 41175092 | 0 | 1 | 601,                      |             | 0 | -9.41 | -8.66 | 4.11 | -0.408 | -1.33 |
| chr15 | 58900504 | 58901063 | SLTM     | 1.10E-09 | - | 58900504 | 58901063 | 0 | 2 | 254,96,                   | 0,463       |   | -8.95 | -8.28 | 9.17 | -0.409 | -1.33 |
| chr8  | 70156969 | 70157169 | NCOA2    | 1.60E-12 | - | 70156969 | 70157169 | 0 | 1 | 200,                      |             | 0 | -11.8 | -10.6 | 2.47 | -0.41  | -1.33 |
| chr9  | 6433993  | 6434094  | AC009060 | 3.20E-07 | + | 6433993  | 6434094  | 0 | 1 | 101,                      |             | 0 | -6.5  | -6.14 | 3.14 | -0.412 | -1.33 |
| chr15 | 84784488 | 84784739 | ZNF592   | 1.50E-08 | + | 84784488 | 84784739 | 0 | 1 | 251,                      |             | 0 | -7.83 | -7.32 | 5.17 | -0.409 | -1.33 |
| chr16 | 2764361  | 2764511  | SRRM2    | 1.10E-06 | + | 2764361  | 2764511  | 0 | 1 | 150,                      |             | 0 | -5.96 | -5.66 | 1.58 | -0.407 | -1.33 |
| chr5  | 1.23E+08 | 1.23E+08 | CEP120   | 4.10E-09 | - | 1.23E+08 | 1.23E+08 | 0 | 2 | 181,118,                  | 0,3371      |   | -8.39 | -7.81 | 5.65 | -0.408 | -1.33 |
| chr22 | 31714200 | 31715446 | PRR14L   | 2.00E-09 | - | 31714200 | 31715446 | 0 | 1 | 1246,                     |             | 0 | -8.7  | -8.07 | 4.73 | -0.409 | -1.33 |
| chr14 | 1.02E+08 | 1.02E+08 | DYNC1H1  | 6.90E-08 | + | 1.02E+08 | 1.02E+08 | 0 | 1 | 301,                      |             | 0 | -7.16 | -6.74 | 3.02 | -0.409 | -1.33 |
| chr16 | 70159941 | 70161455 | AC009060 | 1.30E-08 | - | 70159941 | 70161455 | 0 | 4 | 139,140,207,0,230,793,150 |             |   | -7.87 | -7.36 | 8.31 | -0.411 | -1.33 |
| chr12 | 94581690 | 94581890 | TMCC3    | 0.00013  | - | 94581690 | 94581890 | 0 | 1 | 200,                      |             | 0 | -3.87 | -3.71 | 4.86 | -0.405 | -1.32 |
| chr4  | 48382685 | 48382786 | SLAIN2   | 3.60E-07 | + | 48382685 | 48382786 | 0 | 1 | 101,                      |             | 0 | -6.44 | -6.09 | 1.38 | -0.403 | -1.32 |
| chr1  | 1.01E+08 | 1.01E+08 | DPH5     | 3.40E-05 | - | 1.01E+08 | 1.01E+08 | 0 | 1 | 199,                      |             | 0 | -4.47 | -4.28 | 2.62 | -0.404 | -1.32 |
| chr20 | 354249   | 354499   | NRSN2    | 1.30E-08 | + | 354249   | 354499   | 0 | 1 | 250,                      |             | 0 | -7.88 | -7.37 | 2.77 | -0.406 | -1.32 |
| chr16 | 24919587 | 24920334 | ARHGAP17 | 1.00E-10 | - | 24919587 | 24920334 | 0 | 1 | 747,                      |             | 0 | -10   | -9.15 | 7.13 | -0.404 | -1.32 |
| chr2  | 43224945 | 43225495 | ZFP36L2  | 7.90E-13 | - | 43224945 | 43225495 | 0 | 1 | 550,                      |             | 0 | -12.1 | -10.8 | 2.57 | -0.403 | -1.32 |
| chr19 | 33813816 | 33814116 | KCTD15   | 3.70E-06 | + | 33813816 | 33814116 | 0 | 1 | 300,                      |             | 0 | -5.43 | -5.17 | 4.88 | -0.403 | -1.32 |
| chr8  | 91071264 | 91076635 | OTUD6B   | 1.00E-09 | + | 91071264 | 91076635 | 0 | 3 | 25,81,44,                 | 0,2566,5327 |   | -9    | -8.33 | 1.54 | -0.403 | -1.32 |
| chr2  | 74834129 | 74834229 | HK2      | 6.80E-06 | + | 74834129 | 74834229 | 0 | 1 | 100,                      |             | 0 | -5.17 | -4.93 | 2.74 | -0.403 | -1.32 |
| chr3  | 14141694 | 14141943 | TMEM43   | 1.40E-09 | + | 14141694 | 14141943 | 0 | 1 | 249,                      |             | 0 | -8.84 | -8.19 | 3.6  | -0.404 | -1.32 |
| chr21 | 45513088 | 45513639 | SLC19A1  | 4.30E-07 | - | 45513088 | 45513639 | 0 | 1 | 551,                      |             | 0 | -6.37 | -6.03 | 8.43 | -0.402 | -1.32 |
| chr15 | 84621727 | 84622126 | ZSCAN2   | 2.80E-05 | + | 84621727 | 84622126 | 0 | 1 | 399,                      |             | 0 | -4.55 | -4.34 | 10.2 | -0.403 | -1.32 |
| chr21 | 14967831 | 14968432 | NRIP1    | 1.20E-07 | - | 14967831 | 14968432 | 0 | 1 | 601,                      |             | 0 | -6.91 | -6.52 | 9.33 | -0.404 | -1.32 |

|       |           |          |           |          |        |            |          |         |            |                         |               |       |        |                 |             |           |
|-------|-----------|----------|-----------|----------|--------|------------|----------|---------|------------|-------------------------|---------------|-------|--------|-----------------|-------------|-----------|
| chr8  | 93733587  | 93735778 | RBM12B    | 1.30E-14 | -      | 93733587   | 93735778 | 0       | 1          | 2191,                   | 0             | -13.9 | -12.2  | 10.6            | -0.405      | -1.32     |
| chr10 | 5639161   | 5639704  | ASB13     | 1.90E-07 | -      | 5639161    | 5639704  | 0       | 1          | 543,                    | 0             | -6.71 | -6.33  | 4.67            | -0.405      | -1.32     |
| chr4  | 1.51E+08  | 1.51E+08 | LRBA      | 4.60E-08 | -      | 1.51E+08   | 1.51E+08 | 0       | 1          | 151,                    | 0             | -7.34 | -6.89  | 2.52            | -0.404      | -1.32     |
| chr1  | 88982596  | 88983944 | RBMXL1    | 1.30E-12 | -      | 88982596   | 88983944 | 0       | 1          | 1348,                   | 0             | -11.9 | -10.6  | 5.67            | -0.403      | -1.32     |
| chr11 | 1.02E+08  | 1.02E+08 | AP001830. | 0.0011   | +      | 1.02E+08   | 1.02E+08 | 0       | 1          | 199,                    | 0             | -2.96 | -2.83  | 8.43            | -0.404      | -1.32     |
| chr2  | 65072205  | 65072705 | CEP68     | 3.20E-08 | +      | 65072205   | 65072705 | 0       | 1          | 500,                    | 0             | -7.49 | -7.02  | 5.24            | -0.4        | -1.31     |
| chr7  | 1.52E+08  | 1.52E+08 | KMT2C     | 3.20E-10 | -      | 1.52E+08   | 1.52E+08 | 0       | 2          | 88,1709,                | 0,3132        | -9.5  | -8.73  | 6.83            | -0.4        | -1.31     |
| chr12 | 909903    | 910054   | WNK1      | 1.00E-07 | +      | 909903     | 910054   | 0       | 1          | 151,                    | 0             | -6.99 | -6.59  | 2.67            | -0.401      | -1.31     |
| chr1  | 15848106  | 15874187 | SPEN      | 6.80E-08 | +      | 15848106   | 15874187 | 0       | 3          | 44,321,686,             | 0,24709,2539! | -7.17 | -6.75  | 13.2            | -0.402      | -1.31     |
| chr3  | 97942355  | 97943487 | CRYBG3    | 2.50E-05 | +      | 97942355   | 97943487 | 0       | 2          | 88,262,                 | 0,870         | -4.6  | -3.49  | 4.14            | -0.4        | -1.31     |
| chr15 | 44561492  | 44561790 | EIF3J     | 0.00033  | +      | 44561492   | 44561790 | 0       | 1          | 298,                    | 0             | -3.48 | -3.33  | 2.31            | -0.398      | -1.31     |
| chr1  | 1.48E+08  | 1.48E+08 | BCL9      | 3.00E-08 | +      | 1.48E+08   | 1.48E+08 | 0       | 3          | 655,261,282,0,1868,3439 |               | -7.52 | -7.05  | 3.94            | -0.399      | -1.31     |
| chr19 | 37635116  | 37644450 | ZFP30     | 1.00E-10 | -      | 37635116   | 37644450 | 0       | 3          | 1189,99,55,             | 0,8148,9279   | -10   | -9.15  | 7.7             | -0.399      | -1.31     |
| chr1  | 1.74E+08  | 1.74E+08 | RC3H1     | 7.40E-10 | -      | 1.74E+08   | 1.74E+08 | 0       | 2          | 198,152,                | 0,29158       | -9.13 | -8.43  | 3.43            | -0.398      | -1.31     |
| chr3  | 51419909  | 51420660 | DCAF1     | 1.10E-06 | -      | 51419909   | 51420660 | 0       | 1          | 751,                    | 0             | -5.94 | -5.64  | 4.71            | -0.4        | -1.31     |
| chr7  | 55206039  | 55206638 | EGFR      | 5.10E-09 | +      | 55206039   | 55206638 | 0       | 1          | 599,                    | 0             | -8.29 | -7.72  | 21.3            | -0.399      | -1.31     |
| chrX  | 85270785  | 85271529 | ZNF711    | 6.30E-08 | +      | 85270785   | 85271529 | 0       | 1          | 744,                    | 0             | -7.2  | -6.76  | 10.6            | -0.399      | -1.31     |
| chr8  | 25412314  | 25412664 | DOCK5     | 4.80E-07 | +      | 25412314   | 25412664 | 0       | 1          | 350,                    | 0             | -6.32 | -5.01  | 3.8             | -0.402      | -1.31     |
| chr5  | 50794879  | 50795278 | PARP8     | 1.30E-09 | +      | 50794879   | 50795278 | 0       | 1          | 399,                    | 0             | -8.87 | -8.21  | 9               | -0.402      | -1.31     |
| chr3  | 57559735  | 57559836 | PDE12     | 2.30E-09 | +      | 57559735   | 57559836 | 0       | 1          | 101,                    | 0             | -8.64 | -8.02  | 1.73            | -0.4        | -1.31     |
| chr15 | 84643440  | 84643690 | SCAND2P   | 3.70E-07 | +      | 84643440   | 84643690 | 0       | 1          | 250,                    | 0             | -6.43 | -6.08  | 6.4             | -0.398      | -1.31     |
| chr3  | 49056864  | 49057761 | QRICH1    | 5.00E-11 | -      | 49056864   | 49057761 | 0       | 1          | 897,                    | 0             | -10.3 | -9.41  | 4.81            | -0.402      | -1.31     |
| chr12 | 1.04E+08  | 1.04E+08 | C12orf73  | 1.70E-06 | -      | 1.04E+08   | 1.04E+08 | 0       | 3          | 9,121,19,               | 0,1792,3030   | -5.77 | -5.48  | 2.22            | -0.398      | -1.31     |
| chr3  | 9818991   | 9819340  | TTL3      | 2.10E-06 | +      | 9818991    | 9819340  | 0       | 1          | 349,                    | 0             | -5.67 | -5.39  | 3.2             | -0.398      | -1.31     |
| chr10 | 43644015  | 43644951 | ZNF32-AS  | 4.50E-08 | +      | 43644015   | 43644951 | 0       | 2          | 92,102,                 | 0,834         | -7.35 | -6.9   | 2               | -0.402      | -1.31     |
| chr7  | 66553812  | 66553962 | AC006001  | 1.10E-09 | -      | 66553812   | 66553962 | 0       | 1          | 150,                    | 0             | -8.96 | -7.25  | 3.86            | -0.401      | -1.31     |
| chr   | chromStar | chromEnd | name      | score    | strand | thickStart | thickEnd | itemRgb | blockCount | blockSizes              | blockStarts   | lg.p  | lg.fdr | fold_enrichment | diff.lg.fdr | diff.lg.p |
| chr22 | 50768196  | 50768297 | RABL2B    | 0.0016   | -      | 50768196   | 50768297 | 0       | 1          | 101,                    | 0             | -2.8  | -1.85  | 3               | -434        | -434      |
| chr5  | 1.14E+08  | 1.14E+08 | KCNN2     | 0.0058   | +      | 1.14E+08   | 1.14E+08 | 0       | 1          | 101,                    | 0             | -2.24 | -1.33  | 2.27            | -434        | -434      |
| chr19 | 45935126  | 45935226 | NOVA2     | 0.0013   | -      | 45935126   | 45935226 | 0       | 1          | 100,                    | 0             | -2.88 | -1.92  | 2.4             | -434        | -434      |
| chr6  | 34059924  | 34060025 | GRM4      | 0.00032  | -      | 34059924   | 34060025 | 0       | 1          | 101,                    | 0             | -3.49 | -2.48  | 1.75            | -434        | -434      |
| chr7  | 47277645  | 47277746 | TNS3      | 0.00048  | -      | 47277645   | 47277746 | 0       | 1          | 101,                    | 0             | -3.32 | -2.33  | 2.75            | -434        | -434      |
| chr7  | 47369317  | 47369418 | TNS3      | 0.0015   | -      | 47369317   | 47369418 | 0       | 1          | 101,                    | 0             | -2.83 | -1.88  | 2               | -434        | -434      |
| chr9  | 35853689  | 35853790 | TMEM8B    | 0.00013  | +      | 35853689   | 35853790 | 0       | 1          | 101,                    | 0             | -3.87 | -2.83  | 2.25            | -434        | -434      |
| chr14 | 46840986  | 46841086 | MDGA2     | 9.10E-05 | -      | 46840986   | 46841086 | 0       | 1          | 100,                    | 0             | -4.04 | -2.99  | 1.71            | -434        | -434      |
| chr14 | 46957508  | 46957609 | MDGA2     | 0.00013  | -      | 46957508   | 46957609 | 0       | 1          | 101,                    | 0             | -3.9  | -2.86  | 2.2             | -434        | -434      |
| chr14 | 47035124  | 47058669 | MDGA2     | 0.00013  | -      | 47035124   | 47058669 | 0       | 2          | 180,70,                 | 0,23475       | -3.9  | -2.86  | 3               | -434        | -434      |
| chr14 | 47061330  | 47061431 | MDGA2     | 0.00051  | -      | 47061330   | 47061431 | 0       | 1          | 101,                    | 0             | -3.29 | -2.3   | 2.33            | -434        | -434      |
| chr14 | 47674709  | 47674809 | MDGA2     | 3.00E-06 | -      | 47674709   | 47674809 | 0       | 1          | 100,                    | 0             | -5.52 | -4.31  | 1.67            | -434        | -434      |
| chr4  | 48488446  | 48488545 | SLC10A4   | 4.70E-05 | +      | 48488446   | 48488545 | 0       | 1          | 99,                     | 0             | -4.33 | -3.24  | 2.5             | -434        | -434      |
| chr10 | 53822608  | 53822709 | PCDH15    | 0.00012  | -      | 53822608   | 53822709 | 0       | 1          | 101,                    | 0             | -3.93 | -3.76  | 3.75            | -434        | -434      |
| chr8  | 30384560  | 30384761 | RBPMS     | 8.50E-06 | +      | 30384560   | 30384761 | 0       | 1          | 201,                    | 0             | -5.07 | -4.83  | 3.1             | -434        | -434      |
| chr2  | 50346868  | 50347718 | NRXN1     | 7.20E-05 | -      | 50346868   | 50347718 | 0       | 1          | 850,                    | 0             | -4.14 | -3.96  | 6.05            | -434        | -434      |
| chr17 | 44666416  | 44666816 | MEIOC     | 4.90E-05 | +      | 44666416   | 44666816 | 0       | 1          | 400,                    | 0             | -4.31 | -3.23  | 4.14            | -434        | -434      |
| chr17 | 44667063  | 44667164 | MEIOC     | 4.90E-05 | +      | 44667063   | 44667164 | 0       | 1          | 101,                    | 0             | -4.31 | -3.23  | 1.71            | -434        | -434      |
| chr3  | 18348868  | 18349567 | SATB1     | 3.00E-07 | -      | 18348868   | 18349567 | 0       | 1          | 699,                    | 0             | -6.53 | -6.18  | 8.33            | -434        | -434      |
| chr5  | 1.41E+08  | 1.41E+08 | PCDHB13   | 0.00087  | +      | 1.41E+08   | 1.41E+08 | 0       | 1          | 149,                    | 0             | -3.06 | -2.09  | 1.78            | -434        | -434      |
| chr8  | 26044912  | 26045113 | EBF2      | 0.0016   | -      | 26044912   | 26045113 | 0       | 1          | 201,                    | 0             | -2.79 | -2.66  | 4.11            | -434        | -434      |
| chr9  | 1.37E+08  | 1.37E+08 | CCDC183-  | 0.0054   | -      | 1.37E+08   | 1.37E+08 | 0       | 1          | 100,                    | 0             | -2.27 | -1.36  | 1.67            | -434        | -434      |
| chr1  | 16871792  | 16871943 | BX284668. | 3.10E-05 | +      | 16871792   | 16871943 | 0       | 1          | 151,                    | 0             | -4.51 | -3.41  | 2.4             | -434        | -434      |
| chr22 | 28000132  | 28000233 | TTC28-AS: | 0.00028  | +      | 28000132   | 28000233 | 0       | 1          | 101,                    | 0             | -3.55 | -2.53  | 2.75            | -434        | -434      |



|       |          |          |           |          |   |          |          |   |   |                           |             |       |       |      |       |       |
|-------|----------|----------|-----------|----------|---|----------|----------|---|---|---------------------------|-------------|-------|-------|------|-------|-------|
| chr14 | 41587841 | 41587941 | AL121821. | 5.50E-08 | - | 41587841 | 41587941 | 0 | 1 | 100,                      | 0           | -7.26 | -5.82 | 2.25 | -434  | -434  |
| chr3  | 99805563 | 99805811 | AC069222  | 3.50E-06 | - | 99805563 | 99805811 | 0 | 1 | 248,                      | 0           | -5.46 | -4.25 | 3    | -434  | -434  |
| chr1  | 1.57E+08 | 1.57E+08 | GPATCH4   | 7.20E-10 | - | 1.57E+08 | 1.57E+08 | 0 | 1 | 1048,                     | 0           | -9.14 | -8.44 | 2.74 | -11.4 | -14   |
| chr11 | 65499084 | 65500830 | MALAT1    | 4.40E-07 | + | 65499084 | 65500830 | 0 | 1 | 1746,                     | 0           | -6.36 | -6.02 | 1.31 | -11.1 | -13.7 |
| chr3  | 32891109 | 32891806 | TRIM71    | 4.90E-08 | + | 32891109 | 32891806 | 0 | 1 | 697,                      | 0           | -7.31 | -6.87 | 7.4  | -9.45 | -12.1 |
| chr5  | 21752067 | 21752167 | CDH12     | 0.0015   | - | 21752067 | 21752167 | 0 | 1 | 100,                      | 0           | -2.81 | -1.86 | 2.75 | -9.29 | -11.9 |
| chr15 | 54015168 | 54015818 | UNC13C    | 5.50E-06 | + | 54015168 | 54015818 | 0 | 1 | 650,                      | 0           | -5.26 | -5.01 | 3.27 | -8.47 | -11   |
| chr5  | 15936714 | 15937311 | FBXL7     | 0.00011  | + | 15936714 | 15937311 | 0 | 1 | 597,                      | 0           | -3.94 | -3.77 | 14   | -7.82 | -10.4 |
| chr11 | 62145049 | 62151883 | INCENP    | 2.00E-12 | + | 62145049 | 62151883 | 0 | 8 | 42,121,123,20,119,579,160 | 0           | -11.7 | -10.5 | 2.83 | -7.61 | -10.2 |
| chr2  | 48581553 | 48582103 | STON1-G1  | 0.0019   | + | 48581553 | 48582103 | 0 | 1 | 550,                      | 0           | -2.72 | -1.78 | 4.14 | -7.35 | -9.87 |
| chr9  | 22005201 | 22006202 | CDKN2B    | 5.00E-12 | - | 22005201 | 22006202 | 0 | 1 | 1001,                     | 0           | -11.3 | -10.2 | 5.2  | -7.24 | -9.75 |
| chr1  | 1.07E+08 | 1.07E+08 | NTNG1     | 9.10E-05 | + | 1.07E+08 | 1.07E+08 | 0 | 1 | 400,                      | 0           | -4.04 | -2.98 | 5.17 | -7.22 | -9.72 |
| chr18 | 57477951 | 57478802 | ONECUT2   | 4.20E-08 | + | 57477951 | 57478802 | 0 | 1 | 851,                      | 0           | -7.38 | -6.93 | 10.4 | -7.2  | -9.69 |
| chr22 | 29488851 | 29489250 | NEFH      | 2.90E-07 | + | 29488851 | 29489250 | 0 | 1 | 399,                      | 0           | -6.54 | -6.19 | 1.85 | -6.22 | -8.66 |
| chr8  | 76852414 | 76852764 | ZFHX4     | 0.0026   | + | 76852414 | 76852764 | 0 | 1 | 350,                      | 0           | -2.59 | -2.46 | 3.77 | -6.01 | -8.44 |
| chr10 | 33179735 | 33180285 | NRP1      | 2.50E-06 | - | 33179735 | 33180285 | 0 | 1 | 550,                      | 0           | -5.61 | -5.33 | 8.44 | -5.79 | -8.21 |
| chr1  | 16873488 | 16874023 | BX284668. | 3.10E-05 | + | 16873488 | 16874023 | 0 | 2 | 19,331,                   | 0,204       | -4.51 | -3.41 | 5    | -5.43 | -7.83 |
| chr1  | 32485153 | 32485454 | ZBTB8B    | 4.00E-12 | + | 32485153 | 32485454 | 0 | 1 | 301,                      | 0           | -11.4 | -10.3 | 6.14 | -5.41 | -7.81 |
| chr14 | 46841583 | 46841932 | MDGA2     | 9.10E-05 | - | 46841583 | 46841932 | 0 | 1 | 349,                      | 0           | -4.04 | -3.87 | 7.75 | -5.26 | -7.65 |
| chr16 | 29816599 | 29819945 | AC009133  | 2.30E-07 | + | 29816599 | 29819945 | 0 | 3 | 408,83,391,               | 0,610,2955  | -6.63 | -6.27 | 2.36 | -5.23 | -7.61 |
| chr16 | 29816598 | 29819957 | PAGR1     | 4.00E-13 | + | 29816598 | 29819957 | 0 | 3 | 409,83,403,               | 0,611,2956  | -12.4 | -11   | 2.51 | -5.15 | -7.52 |
| chr19 | 46494856 | 46495256 | AC011484  | 4.00E-04 | + | 46494856 | 46495256 | 0 | 1 | 400,                      | 0           | -3.4  | -2.4  | 4    | -5.06 | -7.43 |
| chr8  | 1.03E+08 | 1.03E+08 | AP002852  | 3.00E-05 | + | 1.03E+08 | 1.03E+08 | 0 | 2 | 18,327,                   | 0,473       | -4.53 | -4.33 | 11.1 | -5.02 | -7.39 |
| chr1  | 62273810 | 62274110 | KANK4     | 3.90E-06 | - | 62273810 | 62274110 | 0 | 1 | 300,                      | 0           | -5.41 | -5.15 | 5.25 | -4.98 | -7.34 |
| chr16 | 29900423 | 29901063 | ASPHD1    | 6.60E-10 | + | 29900423 | 29901063 | 0 | 1 | 640,                      | 0           | -9.18 | -8.47 | 3.08 | -4.96 | -7.32 |
| chr15 | 82786991 | 82787391 | FSD2      | 3.80E-05 | - | 82786991 | 82787391 | 0 | 1 | 400,                      | 0           | -4.42 | -3.32 | 4.75 | -4.88 | -7.22 |
| chr14 | 39179185 | 39180847 | PNN       | 7.90E-15 | + | 39179185 | 39180847 | 0 | 3 | 61,139,345,               | 0,138,1317  | -14.1 | -12.3 | 1.63 | -4.78 | -7.1  |
| chr8  | 17910019 | 17910365 | FGL1      | 7.60E-10 | - | 17910019 | 17910365 | 0 | 1 | 346,                      | 0           | -9.12 | -8.42 | 6.88 | -4.76 | -7.08 |
| chr1  | 36328128 | 36329022 | AL591845. | 0.0056   | + | 36328128 | 36329022 | 0 | 1 | 894,                      | 0           | -2.25 | -2.13 | 4.33 | -4.75 | -7.06 |
| chr1  | 8026787  | 8027236  | AL034417. | 0.00021  | + | 8026787  | 8027236  | 0 | 1 | 449,                      | 0           | -3.68 | -3.52 | 3.67 | -4.67 | -6.97 |
| chr4  | 1.84E+08 | 1.84E+08 | ING2      | 6.30E-15 | + | 1.84E+08 | 1.84E+08 | 0 | 1 | 699,                      | 0           | -14.2 | -12.4 | 7.61 | -4.49 | -6.77 |
| chr14 | 73103178 | 73107337 | RBM25     | 6.30E-12 | + | 73103178 | 73107337 | 0 | 4 | 300,223,90,30,2680,3017,4 | 0           | -11.2 | -10.1 | 1.67 | -4.47 | -6.75 |
| chr2  | 99337420 | 99364393 | EIF5B     | 6.30E-13 | + | 99337420 | 99364393 | 0 | 6 | 169,126,85,60,22815,2304  | 0           | -12.2 | -10.8 | 3.75 | -4.39 | -6.66 |
| chrX  | 1.04E+08 | 1.04E+08 | TCEAL3    | 0.0087   | + | 1.04E+08 | 1.04E+08 | 0 | 2 | 60,480,                   | 0,424       | -2.06 | -1.95 | 5.53 | -4.36 | -6.63 |
| chr17 | 3669281  | 3669572  | EMC6      | 6.00E-06 | + | 3669281  | 3669572  | 0 | 1 | 291,                      | 0           | -5.22 | -4.97 | 2.23 | -4.28 | -6.54 |
| chr4  | 4274386  | 4279665  | LYAR      | 1.20E-06 | - | 4274386  | 4279665  | 0 | 3 | 383,84,24,                | 0,5060,5255 | -5.91 | -5.61 | 3.21 | -4.25 | -6.51 |
| chr3  | 18394562 | 18394813 | SATB1     | 3.30E-05 | - | 18394562 | 18394813 | 0 | 1 | 251,                      | 0           | -4.48 | -4.28 | 4.25 | -4.08 | -6.3  |
| chr5  | 1.16E+08 | 1.16E+08 | SEMA6A    | 1.40E-06 | - | 1.16E+08 | 1.16E+08 | 0 | 1 | 648,                      | 0           | -5.84 | -4.59 | 3.43 | -4.07 | -6.29 |
| chr6  | 30743594 | 30744138 | IER3      | 7.80E-05 | - | 30743594 | 30744138 | 0 | 1 | 544,                      | 0           | -4.11 | -3.93 | 2.83 | -4.03 | -6.25 |
| chr11 | 83459550 | 83459750 | DLG2      | 0.00013  | - | 83459550 | 83459750 | 0 | 1 | 200,                      | 0           | -3.88 | -2.84 | 3.38 | -3.93 | -6.15 |
| chr17 | 16471752 | 16472400 | SNHG29    | 2.20E-05 | + | 16471752 | 16472400 | 0 | 1 | 648,                      | 0           | -4.66 | -4.45 | 12   | -3.93 | -6.14 |
| chr17 | 3669227  | 3669575  | P2RX5-TA  | 1.90E-07 | - | 3669227  | 3669575  | 0 | 1 | 348,                      | 0           | -6.71 | -6.34 | 2.26 | -3.91 | -6.11 |
| chr18 | 57483000 | 57483200 | ONECUT2   | 3.10E-05 | + | 57483000 | 57483200 | 0 | 1 | 200,                      | 0           | -4.51 | -4.31 | 7.88 | -3.85 | -6.05 |
| chr10 | 1.28E+08 | 1.28E+08 | MKI67     | 4.70E-10 | - | 1.28E+08 | 1.28E+08 | 0 | 1 | 3349,                     | 0           | -9.33 | -8.6  | 4.79 | -3.84 | -6.04 |
| chr4  | 1.24E+08 | 1.24E+08 | LINC01091 | 6.50E-07 | + | 1.24E+08 | 1.24E+08 | 0 | 1 | 350,                      | 0           | -6.19 | -5.87 | 7.7  | -3.79 | -5.98 |
| chr14 | 47675007 | 47675307 | MDGA2     | 3.00E-06 | - | 47675007 | 47675307 | 0 | 1 | 300,                      | 0           | -5.52 | -4.31 | 3.88 | -3.79 | -5.97 |
| chr5  | 1.16E+08 | 1.16E+08 | SEMA6A    | 1.40E-06 | - | 1.16E+08 | 1.16E+08 | 0 | 1 | 201,                      | 0           | -5.84 | -4.59 | 3.57 | -3.63 | -5.81 |
| chr8  | 1.45E+08 | 1.45E+08 | ZNF517    | 3.10E-05 | + | 1.45E+08 | 1.45E+08 | 0 | 1 | 398,                      | 0           | -4.51 | -3.4  | 4.4  | -3.61 | -5.79 |
| chr2  | 2.41E+08 | 2.41E+08 | HDLBP     | 3.60E-07 | - | 2.41E+08 | 2.41E+08 | 0 | 1 | 350,                      | 0           | -6.44 | -6.09 | 5.2  | -3.59 | -5.76 |
| chr12 | 2690917  | 2691167  | CACNA1C   | 0.0019   | + | 2690917  | 2691167  | 0 | 1 | 250,                      | 0           | -2.72 | -2.59 | 7.5  | -3.59 | -5.76 |
| chr8  | 76863645 | 76863945 | ZFHX4     | 0.001    | + | 76863645 | 76863945 | 0 | 1 | 300,                      | 0           | -3    | -2.86 | 7.71 | -3.57 | -5.74 |

|       |          |          |            |          |   |          |          |   |   |                           |           |       |       |      |       |       |
|-------|----------|----------|------------|----------|---|----------|----------|---|---|---------------------------|-----------|-------|-------|------|-------|-------|
| chr6  | 32096695 | 32097195 | TNXB       | 8.10E-07 | - | 32096695 | 32097195 | 0 | 1 | 500,                      | 0         | -6.09 | -4.8  | 8.75 | -3.55 | -5.71 |
| chr1  | 2.28E+08 | 2.28E+08 | C1orf35    | 0.00014  | - | 2.28E+08 | 2.28E+08 | 0 | 1 | 644,                      | 0         | -3.84 | -3.67 | 11   | -3.49 | -5.65 |
| chr4  | 1.14E+08 | 1.14E+08 | CAMK2D     | 1.90E-06 | - | 1.14E+08 | 1.14E+08 | 0 | 1 | 300,                      | 0         | -5.71 | -4.47 | 2.57 | -3.48 | -5.63 |
| chr20 | 4699280  | 4699821  | PRNP       | 9.30E-10 | + | 4699280  | 4699821  | 0 | 1 | 541,                      | 0         | -9.03 | -8.34 | 3.47 | -3.45 | -5.6  |
| chr9  | 33386163 | 33386987 | AQP7       | 4.40E-05 | - | 33386163 | 33386987 | 0 | 2 | 378,19,                   | 0,805     | -4.36 | -4.17 | 3.75 | -3.37 | -5.51 |
| chr12 | 19439567 | 19440622 | AEBP2      | 1.30E-12 | + | 19439567 | 19440622 | 0 | 2 | 803,42,                   | 0,1013    | -11.9 | -10.6 | 3.36 | -3.33 | -5.47 |
| chr6  | 30743548 | 30744148 | IER3       | 1.80E-06 | - | 30743548 | 30744148 | 0 | 1 | 600,                      | 0         | -5.74 | -5.46 | 3    | -3.23 | -5.36 |
| chr1  | 1.61E+08 | 1.61E+08 | ARHGAP30   | 0.00024  | - | 1.61E+08 | 1.61E+08 | 0 | 1 | 696,                      | 0         | -3.62 | -3.47 | 4.33 | -3.23 | -5.36 |
| chr19 | 5080810  | 5080960  | KDM4B      | 0.00078  | + | 5080810  | 5080960  | 0 | 1 | 150,                      | 0         | -3.11 | -2.14 | 2.9  | -3.22 | -5.34 |
| chr9  | 1.37E+08 | 1.37E+08 | CCDC183-   | 0.0011   | - | 1.37E+08 | 1.37E+08 | 0 | 2 | 177,23,                   | 0,1701    | -2.96 | -2.83 | 5.67 | -3.21 | -5.33 |
| chr2  | 1.7E+08  | 1.7E+08  | PPIG       | 1.60E-13 | + | 1.7E+08  | 1.7E+08  | 0 | 2 | 81,1114,                  | 0,252     | -12.8 | -11.3 | 3.55 | -3.18 | -5.3  |
| chr19 | 47679366 | 47679864 | BICRA      | 3.40E-05 | + | 47679366 | 47679864 | 0 | 1 | 498,                      | 0         | -4.47 | -3.37 | 3.14 | -3.17 | -5.28 |
| chr11 | 65890848 | 65891635 | CCDC85B    | 2.00E-31 | + | 65890848 | 65891635 | 0 | 1 | 787,                      | 0         | -30.7 | -28   | 5.75 | -3.17 | -5.27 |
| chr2  | 2.38E+08 | 2.38E+08 | ESPNL      | 9.50E-05 | + | 2.38E+08 | 2.38E+08 | 0 | 1 | 300,                      | 0         | -4.02 | -2.96 | 4.43 | -3.15 | -5.24 |
| chr10 | 1.19E+08 | 1.19E+08 | EIF3A      | 6.30E-14 | - | 1.19E+08 | 1.19E+08 | 0 | 7 | 159,202,779,0,1087,4843,6 |           | -13.2 | -11.6 | 2.16 | -3.14 | -5.23 |
| chr6  | 32095648 | 32096048 | TNXB       | 8.10E-07 | - | 32095648 | 32096048 | 0 | 1 | 400,                      | 0         | -6.09 | -4.8  | 4.4  | -3.14 | -5.23 |
| chr4  | 1.19E+08 | 1.19E+08 | SYNPO2     | 2.60E-06 | + | 1.19E+08 | 1.19E+08 | 0 | 1 | 801,                      | 0         | -5.59 | -5.32 | 7    | -3.08 | -5.16 |
| chr1  | 2.02E+08 | 2.02E+08 | TIMM17A    | 7.90E-12 | + | 2.02E+08 | 2.02E+08 | 0 | 2 | 38,407,                   | 0,3963    | -11.1 | -10   | 3.26 | -3.08 | -5.15 |
| chrX  | 1.2E+08  | 1.2E+08  | SOWAHD     | 2.60E-05 | + | 1.2E+08  | 1.2E+08  | 0 | 1 | 441,                      | 0         | -4.59 | -3.48 | 6.25 | -3.02 | -5.09 |
| chr2  | 2.38E+08 | 2.38E+08 | ESPNL      | 9.50E-05 | + | 2.38E+08 | 2.38E+08 | 0 | 1 | 499,                      | 0         | -4.02 | -3.85 | 7    | -3.02 | -5.08 |
| chr18 | 67513111 | 67513312 | DSEL       | 0.0016   | - | 67513111 | 67513312 | 0 | 1 | 201,                      | 0         | -2.8  | -2.67 | 5.22 | -3    | -5.06 |
| chr8  | 76866686 | 76866886 | ZFHX4      | 0.0038   | + | 76866686 | 76866886 | 0 | 1 | 200,                      | 0         | -2.42 | -1.49 | 5.29 | -2.99 | -5.05 |
| chr1  | 1.46E+08 | 1.46E+08 | LINC01719  | 7.90E-06 | + | 1.46E+08 | 1.46E+08 | 0 | 1 | 199,                      | 0         | -5.1  | -3.93 | 3.75 | -2.99 | -5.04 |
| chr4  | 4689968  | 4690169  | STX18-AS1  | 0.0038   | + | 4689968  | 4690169  | 0 | 1 | 201,                      | 0         | -2.42 | -1.5  | 8.25 | -2.99 | -5.04 |
| chr2  | 1.65E+08 | 1.65E+08 | AC019197   | 4.50E-06 | + | 1.65E+08 | 1.65E+08 | 0 | 1 | 349,                      | 0         | -5.35 | -4.16 | 3.33 | -2.98 | -5.03 |
| chr19 | 13207040 | 13207341 | CACNA1A    | 8.50E-06 | - | 13207040 | 13207341 | 0 | 1 | 301,                      | 0         | -5.07 | -4.84 | 6.6  | -2.97 | -5.02 |
| chr1  | 27967148 | 27967448 | XKR8       | 0.001    | + | 27967148 | 27967448 | 0 | 1 | 300,                      | 0         | -3    | -2.04 | 4.29 | -2.93 | -4.95 |
| chr19 | 36489747 | 36490295 | ACO92295   | 3.60E-05 | + | 36489747 | 36490295 | 0 | 1 | 548,                      | 0         | -4.44 | -4.24 | 7.13 | -2.93 | -4.95 |
| chr19 | 44662813 | 44663563 | PVR        | 9.50E-09 | + | 44662813 | 44663563 | 0 | 1 | 750,                      | 0         | -8.02 | -7.49 | 3.54 | -2.91 | -4.93 |
| chr18 | 57476601 | 57476852 | ONECUT2    | 4.80E-05 | + | 57476601 | 57476852 | 0 | 1 | 251,                      | 0         | -4.32 | -3.24 | 5    | -2.89 | -4.91 |
| chr2  | 69937281 | 69938480 | MXD1       | 1.30E-05 | + | 69937281 | 69938480 | 0 | 2 | 113,384,                  | 0,815     | -4.88 | -4.66 | 5.06 | -2.85 | -4.85 |
| chr15 | 64157231 | 64157382 | SNX22      | 4.50E-05 | + | 64157231 | 64157382 | 0 | 1 | 151,                      | 0         | -4.35 | -3.27 | 4    | -2.84 | -4.84 |
| chr1  | 10638500 | 10639500 | CASZ1      | 7.90E-06 | - | 10638500 | 10639500 | 0 | 1 | 1000,                     | 0         | -5.1  | -4.86 | 5    | -2.82 | -4.82 |
| chr2  | 2.41E+08 | 2.41E+08 | HDLBP      | 8.50E-05 | - | 2.41E+08 | 2.41E+08 | 0 | 1 | 350,                      | 0         | -4.07 | -3.9  | 7    | -2.77 | -4.75 |
| chr8  | 76705949 | 76706299 | ZFHX4      | 0.00043  | + | 76705949 | 76706299 | 0 | 1 | 350,                      | 0         | -3.37 | -2.37 | 4    | -2.73 | -4.71 |
| chr2  | 2.41E+08 | 2.41E+08 | HDLBP      | 8.50E-05 | - | 2.41E+08 | 2.41E+08 | 0 | 1 | 150,                      | 0         | -4.07 | -3.01 | 2.75 | -2.71 | -4.69 |
| chr3  | 10141800 | 10142098 | VHL        | 3.10E-10 | + | 10141800 | 10142098 | 0 | 1 | 298,                      | 0         | -9.51 | -8.73 | 2.88 | -2.7  | -4.67 |
| chr12 | 89542085 | 89542385 | PLOC1B-AS1 | 4.30E-07 | + | 89542085 | 89542385 | 0 | 1 | 300,                      | 0         | -6.37 | -6.03 | 7.25 | -2.66 | -4.63 |
| chr6  | 1.11E+08 | 1.11E+08 | CDK19      | 6.90E-09 | - | 1.11E+08 | 1.11E+08 | 0 | 2 | 271,429,                  | 0,1155    | -8.16 | -7.61 | 4.96 | -2.64 | -4.61 |
| chr13 | 45391389 | 45391789 | TPT1-AS1   | 0.00044  | + | 45391389 | 45391789 | 0 | 1 | 400,                      | 0         | -3.36 | -3.21 | 8.2  | -2.64 | -4.61 |
| chr19 | 12247745 | 12248094 | ZNF44      | 0.00036  | - | 12247745 | 12248094 | 0 | 1 | 349,                      | 0         | -3.44 | -2.43 | 4.25 | -2.64 | -4.6  |
| chr16 | 650145   | 650558   | WDR90      | 0.0046   | + | 650145   | 650558   | 0 | 3 | 22,109,20,                | 0,108,393 | -2.34 | -1.42 | 5.8  | -2.63 | -4.59 |
| chr17 | 32041232 | 32041532 | SH3GL1P1   | 1.00E-04 | + | 32041232 | 32041532 | 0 | 1 | 300,                      | 0         | -3.98 | -2.93 | 4    | -2.63 | -4.59 |
| chr19 | 35902358 | 35902957 | AD000864   | 0.00013  | - | 35902358 | 35902957 | 0 | 1 | 599,                      | 0         | -3.9  | -3.74 | 2.8  | -2.63 | -4.59 |
| chr1  | 2.28E+08 | 2.28E+08 | OBSCN      | 1.70E-05 | + | 2.28E+08 | 2.28E+08 | 0 | 4 | 219,264,264,0,498,3771,43 |           | -4.76 | -4.55 | 5.44 | -2.61 | -4.56 |
| chr11 | 1.26E+08 | 1.26E+08 | CDON       | 1.00E-04 | - | 1.26E+08 | 1.26E+08 | 0 | 1 | 200,                      | 0         | -4    | -2.95 | 3.33 | -2.59 | -4.54 |
| chr11 | 86808261 | 86808762 | PRSS23     | 6.20E-10 | + | 86808261 | 86808762 | 0 | 1 | 501,                      | 0         | -9.21 | -8.5  | 7    | -2.59 | -4.54 |
| chr17 | 61353751 | 61354350 | BCAS3      | 8.50E-07 | + | 61353751 | 61354350 | 0 | 1 | 599,                      | 0         | -6.07 | -5.76 | 7.5  | -2.58 | -4.52 |
| chr1  | 32240744 | 32241620 | MTMR9LP    | 2.80E-09 | + | 32240744 | 32241620 | 0 | 2 | 158,484,                  | 0,392     | -8.55 | -7.94 | 9.14 | -2.58 | -4.52 |
| chr8  | 76851218 | 76851518 | ZFHX4      | 0.00022  | - | 76851218 | 76851518 | 0 | 1 | 300,                      | 0         | -3.65 | -2.63 | 6    | -2.53 | -4.46 |
| chr15 | 64154448 | 64154648 | SNX22      | 0.00037  | + | 64154448 | 64154648 | 0 | 1 | 200,                      | 0         | -3.43 | -2.43 | 4.25 | -2.53 | -4.46 |

|       |          |          |           |          |   |          |          |   |   |             |               |       |       |      |       |       |
|-------|----------|----------|-----------|----------|---|----------|----------|---|---|-------------|---------------|-------|-------|------|-------|-------|
| chr20 | 64100038 | 64100287 | AL121581. | 1.20E-07 | - | 64100038 | 64100287 | 0 | 1 | 249,        | 0             | -6.93 | -5.54 | 6    | -2.53 | -4.46 |
| chr4  | 65601905 | 65670445 | EPHA5     | 1.90E-09 | - | 65601905 | 65670445 | 0 | 3 | 399,65,884, | 0,41457,67651 | -8.71 | -8.08 | 6.64 | -2.51 | -4.43 |
| chr19 | 48195045 | 48196729 | ZSWIM9    | 2.80E-09 | + | 48195045 | 48196729 | 0 | 1 | 1684,       | 0             | -8.55 | -7.95 | 6.55 | -2.5  | -4.42 |
| chr20 | 64098895 | 64099145 | AL121581. | 1.20E-07 | - | 64098895 | 64099145 | 0 | 1 | 250,        | 0             | -6.93 | -5.54 | 6.33 | -2.49 | -4.4  |
| chr19 | 58009337 | 58009687 | AC008969. | 0.00036  | + | 58009337 | 58009687 | 0 | 1 | 350,        | 0             | -3.44 | -2.44 | 7.5  | -2.48 | -4.39 |
| chr10 | 17229327 | 17229676 | VIM       | 7.40E-06 | + | 17229327 | 17229676 | 0 | 1 | 349,        | 0             | -5.13 | -4.89 | 1.37 | -2.44 | -4.35 |
| chr16 | 16155237 | 16155637 | ABCC6     | 4.30E-07 | - | 16155237 | 16155637 | 0 | 1 | 400,        | 0             | -6.37 | -6.03 | 10.1 | -2.44 | -4.35 |
| chr12 | 2691000  | 2691150  | CACNA1C   | 9.50E-07 | - | 2691000  | 2691150  | 0 | 1 | 150,        | 0             | -6.02 | -4.75 | 8    | -2.42 | -4.33 |
| chr6  | 32096147 | 32096547 | TNXB      | 8.10E-07 | - | 32096147 | 32096547 | 0 | 1 | 400,        | 0             | -6.09 | -4.8  | 7.5  | -2.4  | -4.31 |
| chr22 | 37182313 | 37182664 | C1QTNF6   | 1.30E-05 | - | 37182313 | 37182664 | 0 | 1 | 351,        | 0             | -4.9  | -4.67 | 4.25 | -2.39 | -4.3  |
| chr7  | 44068656 | 44069206 | DBNL      | 0.00011  | + | 44068656 | 44069206 | 0 | 1 | 550,        | 0             | -3.94 | -3.77 | 9.5  | -2.4  | -4.3  |
| chr14 | 1.02E+08 | 1.02E+08 | TECFR     | 0.00025  | + | 1.02E+08 | 1.02E+08 | 0 | 1 | 250,        | 0             | -3.61 | -2.59 | 4.2  | -2.39 | -4.3  |
| chr17 | 36950249 | 36953178 | AATF      | 2.60E-10 | + | 36950249 | 36953178 | 0 | 2 | 156,293,    | 0,2636        | -9.59 | -8.8  | 1.9  | -2.39 | -4.29 |
| chr1  | 45206182 | 45303953 | ZSWIM5    | 6.20E-05 | - | 45206182 | 45303953 | 0 | 2 | 423,27,     | 0,97744       | -4.21 | -4.03 | 4.83 | -2.35 | -4.25 |
| chr2  | 2.02E+08 | 2.02E+08 | NOP58     | 3.90E-10 | + | 2.02E+08 | 2.02E+08 | 0 | 2 | 34,115,     | 0,2587        | -9.41 | -8.65 | 1.57 | -2.35 | -4.24 |
| chr22 | 29313031 | 29313478 | RASL10A   | 0.00011  | - | 29313031 | 29313478 | 0 | 1 | 447,        | 0             | -3.94 | -3.77 | 9    | -2.34 | -4.23 |
| chrX  | 55487288 | 55487537 | USP51     | 2.00E-06 | - | 55487288 | 55487537 | 0 | 1 | 249,        | 0             | -5.69 | -4.45 | 5.29 | -2.32 | -4.21 |
| chr15 | 99883734 | 99901453 | AC090825. | 7.10E-06 | + | 99883734 | 99901453 | 0 | 2 | 192,58,     | 0,17661       | -5.15 | -3.98 | 8    | -2.3  | -4.18 |
| chr2  | 2.41E+08 | 2.41E+08 | HDLBP     | 8.50E-05 | - | 2.41E+08 | 2.41E+08 | 0 | 1 | 200,        | 0             | -4.07 | -3.9  | 2.78 | -2.26 | -4.14 |
| chr2  | 2.06E+08 | 2.06E+08 | NRP2      | 3.00E-04 | + | 2.06E+08 | 2.06E+08 | 0 | 1 | 251,        | 0             | -3.52 | -2.51 | 9.25 | -2.25 | -4.13 |
| chr16 | 89498786 | 89499037 | SPG7      | 0.00059  | + | 89498786 | 89499037 | 0 | 1 | 251,        | 0             | -3.23 | -2.25 | 4.25 | -2.21 | -4.08 |
| chr13 | 51462188 | 51462389 | INTS6-AS1 | 0.00027  | + | 51462188 | 51462389 | 0 | 1 | 201,        | 0             | -3.57 | -2.56 | 6    | -2.21 | -4.08 |
| chr21 | 43982356 | 43982756 | AGPAT3    | 5.00E-05 | + | 43982356 | 43982756 | 0 | 1 | 400,        | 0             | -4.3  | -4.11 | 8.89 | -2.19 | -4.05 |
| chr19 | 46391155 | 46392782 | PPP5C     | 3.20E-06 | + | 46391155 | 46392782 | 0 | 2 | 103,146,    | 0,1481        | -5.49 | -4.27 | 2.6  | -2.17 | -4.02 |
| chr10 | 17229397 | 17229691 | VIM-AS1   | 2.50E-13 | - | 17229397 | 17229691 | 0 | 1 | 294,        | 0             | -12.6 | -11.2 | 1.47 | -2.15 | -4    |
| chr21 | 44456900 | 44457900 | LRRC3     | 3.50E-07 | + | 44456900 | 44457900 | 0 | 1 | 1000,       | 0             | -6.45 | -6.1  | 8.17 | -2.13 | -3.97 |
| chr2  | 2.16E+08 | 2.16E+08 | TMEM169   | 4.40E-05 | + | 2.16E+08 | 2.16E+08 | 0 | 2 | 118,181,    | 0,3803        | -4.36 | -3.27 | 3.75 | -2.13 | -3.97 |
| chr8  | 1.07E+08 | 1.07E+08 | OXR1      | 1.60E-07 | + | 1.07E+08 | 1.07E+08 | 0 | 1 | 599,        | 0             | -6.8  | -6.42 | 9.14 | -2.1  | -3.94 |
| chr2  | 10039876 | 10040221 | AC104794. | 3.00E-10 | - | 10039876 | 10040221 | 0 | 1 | 345,        | 0             | -9.53 | -8.75 | 6.5  | -2.1  | -3.94 |
| chr20 | 30281754 | 30281955 | LINC01597 | 0.00022  | - | 30281754 | 30281955 | 0 | 1 | 201,        | 0             | -3.66 | -2.64 | 3    | -2.1  | -3.93 |
| chr4  | 10091634 | 10091984 | WDR1      | 6.30E-05 | - | 10091634 | 10091984 | 0 | 1 | 350,        | 0             | -4.2  | -4.02 | 4.83 | -2.08 | -3.91 |
| chr4  | 4587972  | 4588122  | STX18-AS: | 0.0022   | + | 4587972  | 4588122  | 0 | 1 | 150,        | 0             | -2.66 | -1.72 | 3.75 | -2.08 | -3.91 |
| chr2  | 2.41E+08 | 2.41E+08 | HDLBP     | 1.20E-05 | - | 2.41E+08 | 2.41E+08 | 0 | 2 | 3,98,       | 0,2479        | -4.93 | -4.71 | 2.5  | -2.07 | -3.9  |
| chr2  | 48582302 | 48582503 | STON1-G1  | 0.001    | + | 48582302 | 48582503 | 0 | 1 | 201,        | 0             | -3    | -2.86 | 5.43 | -2.07 | -3.89 |
| chr1  | 2.03E+08 | 2.03E+08 | AC098934. | 0.0036   | - | 2.03E+08 | 2.03E+08 | 0 | 1 | 198,        | 0             | -2.44 | -1.52 | 3.25 | -2.07 | -3.89 |
| chr18 | 57735349 | 57737860 | ACO27097. | 5.80E-06 | + | 57735349 | 57737860 | 0 | 3 | 243,56,99,  | 0,1686,2412   | -5.24 | -4.05 | 5.4  | -2.06 | -3.88 |
| chr16 | 11316534 | 11317029 | RMI2      | 7.90E-07 | + | 11316534 | 11317029 | 0 | 1 | 495,        | 0             | -6.1  | -5.78 | 7.14 | -2.06 | -3.87 |
| chr5  | 77147783 | 77148084 | ZBED3-AS  | 2.50E-06 | + | 77147783 | 77148084 | 0 | 1 | 301,        | 0             | -5.61 | -5.34 | 6.67 | -2.06 | -3.87 |
| chr2  | 2.41E+08 | 2.41E+08 | HDLBP     | 8.50E-05 | - | 2.41E+08 | 2.41E+08 | 0 | 1 | 200,        | 0             | -4.07 | -3.01 | 2.44 | -2.05 | -3.86 |
| chr2  | 3643800  | 3644099  | COLEC11   | 2.90E-06 | + | 3643800  | 3644099  | 0 | 1 | 299,        | 0             | -5.54 | -5.27 | 4    | -2.05 | -3.86 |
| chr9  | 96888671 | 96889172 | MFSD14C   | 2.10E-06 | - | 96888671 | 96889172 | 0 | 1 | 501,        | 0             | -5.67 | -4.44 | 5    | -2.05 | -3.86 |
| chr8  | 80976587 | 80976787 | PAG1      | 4.70E-07 | - | 80976587 | 80976787 | 0 | 1 | 200,        | 0             | -6.33 | -5.02 | 5.5  | -2.03 | -3.84 |
| chr2  | 1.09E+08 | 1.09E+08 | RANBP2    | 5.60E-08 | + | 1.09E+08 | 1.09E+08 | 0 | 1 | 551,        | 0             | -7.25 | -6.81 | 2.86 | -2.03 | -3.84 |
| chr7  | 1058313  | 1058663  | GPR146    | 0.00095  | + | 1058313  | 1058663  | 0 | 1 | 350,        | 0             | -3.02 | -2.88 | 6.86 | -2.02 | -3.83 |
| chr12 | 94570153 | 94570452 | TMCC3     | 0.00028  | - | 94570153 | 94570452 | 0 | 1 | 299,        | 0             | -3.55 | -3.4  | 6.2  | -2.02 | -3.82 |
| chr20 | 1181384  | 1181634  | PSMF1     | 1.00E-05 | + | 1181384  | 1181634  | 0 | 1 | 250,        | 0             | -4.98 | -3.83 | 4    | -1.98 | -3.79 |
| chr6  | 34059024 | 34059225 | GRM4      | 0.00032  | - | 34059024 | 34059225 | 0 | 1 | 201,        | 0             | -3.49 | -2.48 | 3    | -1.96 | -3.75 |
| chr22 | 23124634 | 23124933 | GNAZ      | 2.80E-06 | + | 23124634 | 23124933 | 0 | 1 | 299,        | 0             | -5.55 | -5.28 | 8.5  | -1.96 | -3.75 |
| chr15 | 69403647 | 69403847 | PAQR5     | 1.20E-06 | + | 69403647 | 69403847 | 0 | 1 | 200,        | 0             | -5.91 | -4.65 | 4.4  | -1.96 | -3.75 |
| chr1  | 1064516  | 1065377  | AL390719. | 0.0019   | + | 1064516  | 1065377  | 0 | 2 | 73,26,      | 0,835         | -2.71 | -2.58 | 5.89 | -1.93 | -3.72 |
| chr8  | 80985094 | 80985294 | PAG1      | 4.70E-07 | - | 80985094 | 80985294 | 0 | 1 | 200,        | 0             | -6.33 | -5.02 | 3.5  | -1.92 | -3.71 |

|       |          |          |           |          |   |          |          |   |   |                           |           |       |       |      |       |       |
|-------|----------|----------|-----------|----------|---|----------|----------|---|---|---------------------------|-----------|-------|-------|------|-------|-------|
| chr8  | 66429553 | 66430537 | RRS1      | 5.90E-09 | + | 66429553 | 66430537 | 0 | 1 | 984,                      | 0         | -8.23 | -7.67 | 8.87 | -1.91 | -3.7  |
| chr14 | 47675405 | 47675605 | MDGA2     | 3.00E-06 | - | 47675405 | 47675605 | 0 | 1 | 200,                      | 0         | -5.52 | -4.31 | 3    | -1.91 | -3.69 |
| chrX  | 73851574 | 73852324 | XIST      | 1.10E-10 | - | 73851574 | 73852324 | 0 | 1 | 750,                      | 0         | -9.96 | -9.1  | 2.83 | -1.89 | -3.67 |
| chr18 | 76559533 | 76559783 | LINC00683 | 0.0013   | + | 76559533 | 76559783 | 0 | 1 | 250,                      | 0         | -2.9  | -2.76 | 6.71 | -1.89 | -3.67 |
| chr7  | 1.01E+08 | 1.01E+08 | SRRT      | 2.60E-08 | + | 1.01E+08 | 1.01E+08 | 0 | 4 | 63,185,99,500,191,563,746 | 0         | -7.59 | -7.11 | 1.62 | -1.89 | -3.66 |
| chr11 | 14643853 | 14644253 | PDE3B     | 3.30E-09 | + | 14643853 | 14644253 | 0 | 1 | 400,                      | 0         | -8.48 | -7.88 | 3.36 | -1.89 | -3.66 |
| chr4  | 80201493 | 80202434 | PRDM8     | 5.00E-08 | + | 80201493 | 80202434 | 0 | 2 | 28,521,                   | 0,420     | -7.3  | -6.86 | 6    | -1.89 | -3.66 |
| chr11 | 1.05E+08 | 1.05E+08 | LINC02552 | 0.00083  | - | 1.05E+08 | 1.05E+08 | 0 | 1 | 151,                      | 0         | -3.08 | -2.11 | 5    | -1.89 | -3.66 |
| chr2  | 2.41E+08 | 2.41E+08 | HDLBP     | 1.20E-05 | - | 2.41E+08 | 2.41E+08 | 0 | 1 | 200,                      | 0         | -4.93 | -4.71 | 3    | -1.88 | -3.65 |
| chr14 | 73718367 | 73719017 | ELMSAN1   | 6.30E-10 | - | 73718367 | 73719017 | 0 | 1 | 650,                      | 0         | -9.2  | -8.49 | 6.47 | -1.87 | -3.64 |
| chr19 | 32675855 | 32677402 | RGS9BP    | 3.00E-10 | + | 32675855 | 32677402 | 0 | 1 | 1547,                     | 0         | -9.52 | -8.74 | 10.4 | -1.87 | -3.64 |
| chr1  | 27958860 | 27959108 | SMPDL3B   | 0.00098  | + | 27958860 | 27959108 | 0 | 1 | 248,                      | 0         | -3.01 | -2.88 | 9.8  | -1.87 | -3.63 |
| chr15 | 53978650 | 53978851 | UNC13C    | 5.50E-06 | + | 53978650 | 53978851 | 0 | 1 | 201,                      | 0         | -5.26 | -5.01 | 3.4  | -1.87 | -3.63 |
| chr12 | 53995335 | 53995631 | HOXC-AS2  | 0.00015  | - | 53995335 | 53995631 | 0 | 1 | 296,                      | 0         | -3.83 | -3.67 | 4.18 | -1.87 | -3.63 |
| chr2  | 10449088 | 10449438 | ODC1-DT   | 3.30E-06 | + | 10449088 | 10449438 | 0 | 1 | 350,                      | 0         | -5.48 | -5.22 | 5    | -1.87 | -3.63 |
| chr1  | 1.55E+08 | 1.55E+08 | KCNN3     | 2.00E-05 | - | 1.55E+08 | 1.55E+08 | 0 | 1 | 301,                      | 0         | -4.7  | -3.58 | 2.8  | -1.86 | -3.61 |
| chr16 | 88686781 | 88687080 | SNAI3-AS1 | 0.00024  | + | 88686781 | 88687080 | 0 | 1 | 299,                      | 0         | -3.62 | -2.6  | 4    | -1.85 | -3.61 |
| chr17 | 35844130 | 35846925 | TAF15     | 1.00E-11 | + | 35844130 | 35846925 | 0 | 4 | 28,89,562,200,149,346,277 | 0         | -11   | -9.95 | 1.37 | -1.86 | -3.61 |
| chrX  | 55488229 | 55488477 | USP51     | 2.00E-06 | + | 55488229 | 55488477 | 0 | 1 | 248,                      | 0         | -5.69 | -5.41 | 2.75 | -1.84 | -3.6  |
| chr1  | 19258751 | 19259047 | MRTO4     | 2.80E-09 | + | 19258751 | 19259047 | 0 | 1 | 296,                      | 0         | -8.55 | -7.95 | 2.97 | -1.82 | -3.57 |
| chr19 | 48712923 | 48713923 | MAMSTR    | 1.10E-05 | - | 48712923 | 48713923 | 0 | 3 | 627,55,64,                | 0,792,936 | -4.94 | -4.72 | 6.7  | -1.82 | -3.56 |
| chr20 | 3471067  | 3471167  | ATRN      | 3.50E-05 | + | 3471067  | 3471167  | 0 | 1 | 100,                      | 0         | -4.45 | -4.25 | 1.41 | -1.81 | -3.55 |
| chr12 | 1.2E+08  | 1.2E+08  | DYNLL1    | 2.00E-11 | + | 1.2E+08  | 1.2E+08  | 0 | 1 | 150,                      | 0         | -10.7 | -9.68 | 1.74 | -1.82 | -3.55 |
| chrX  | 74069808 | 74070009 | JPX       | 0.0043   | + | 74069808 | 74070009 | 0 | 1 | 201,                      | 0         | -2.37 | -1.45 | 3.6  | -1.81 | -3.55 |
| chr21 | 14966332 | 14967282 | NRIP1     | 1.20E-07 | - | 14966332 | 14967282 | 0 | 1 | 950,                      | 0         | -6.91 | -6.52 | 4.62 | -1.81 | -3.54 |
| chr9  | 1.3E+08  | 1.3E+08  | LINC00963 | 0.00033  | + | 1.3E+08  | 1.3E+08  | 0 | 1 | 350,                      | 0         | -3.48 | -2.48 | 4.75 | -1.81 | -3.54 |
| chr5  | 15928219 | 15936516 | FBXL7     | 0.00011  | + | 15928219 | 15936516 | 0 | 2 | 282,67,                   | 0,8230    | -3.94 | -2.9  | 2.33 | -1.8  | -3.53 |
| chr7  | 1.57E+08 | 1.57E+08 | NOM1      | 1.90E-10 | + | 1.57E+08 | 1.57E+08 | 0 | 2 | 713,37,                   | 0,2462    | -9.71 | -8.9  | 2.63 | -1.8  | -3.52 |
| chr6  | 52405334 | 52405535 | PAQR8     | 1.10E-05 | + | 52405334 | 52405535 | 0 | 1 | 201,                      | 0         | -4.95 | -3.8  | 4.25 | -1.79 | -3.52 |
| chr1  | 1.01E+08 | 1.01E+08 | S1PR1     | 7.10E-06 | + | 1.01E+08 | 1.01E+08 | 0 | 1 | 250,                      | 0         | -5.15 | -3.98 | 4    | -1.79 | -3.51 |
| chr18 | 57738107 | 57738306 | ACO27097  | 5.80E-06 | + | 57738107 | 57738306 | 0 | 1 | 199,                      | 0         | -5.24 | -4.05 | 5    | -1.79 | -3.51 |
| chr2  | 1.12E+08 | 1.12E+08 | FBLN7     | 0.00022  | + | 1.12E+08 | 1.12E+08 | 0 | 1 | 350,                      | 0         | -3.66 | -3.5  | 5    | -1.78 | -3.5  |
| chrX  | 74161208 | 74161551 | MKRN5P    | 4.20E-05 | - | 74161208 | 74161551 | 0 | 1 | 343,                      | 0         | -4.38 | -4.19 | 6.57 | -1.78 | -3.5  |
| chr10 | 87862739 | 87863138 | KLLN      | 0.00011  | - | 87862739 | 87863138 | 0 | 1 | 399,                      | 0         | -3.97 | -2.92 | 4.5  | -1.78 | -3.5  |
| chr2  | 1.03E+08 | 1.03E+08 | SLC9A2    | 0.00019  | + | 1.03E+08 | 1.03E+08 | 0 | 1 | 351,                      | 0         | -3.73 | -3.57 | 4.75 | -1.78 | -3.49 |
| chr18 | 62979338 | 62979538 | PHLPP1    | 3.00E-08 | + | 62979338 | 62979538 | 0 | 1 | 200,                      | 0         | -7.52 | -7.05 | 5.8  | -1.77 | -3.48 |
| chr2  | 1.31E+08 | 1.31E+08 | ARHGEF4   | 0.00034  | + | 1.31E+08 | 1.31E+08 | 0 | 1 | 200,                      | 0         | -3.47 | -2.46 | 8.25 | -1.76 | -3.47 |
| chr11 | 61796738 | 61797088 | FEN1      | 1.00E-06 | + | 61796738 | 61797088 | 0 | 1 | 350,                      | 0         | -5.99 | -5.68 | 3.19 | -1.76 | -3.47 |
| chr19 | 34481987 | 34482187 | WTIP      | 1.00E-05 | + | 34481987 | 34482187 | 0 | 1 | 200,                      | 0         | -4.98 | -4.75 | 2.03 | -1.75 | -3.46 |
| chr10 | 1.01E+08 | 1.01E+08 | PDZD7     | 0.0026   | - | 1.01E+08 | 1.01E+08 | 0 | 1 | 249,                      | 0         | -2.59 | -1.65 | 3.11 | -1.72 | -3.42 |
| chr2  | 1.01E+08 | 1.01E+08 | RPL31     | 0.00037  | + | 1.01E+08 | 1.01E+08 | 0 | 1 | 101,                      | 0         | -3.43 | -3.28 | 1.6  | -1.71 | -3.41 |
| chr1  | 15409937 | 15410087 | EFHD2     | 7.20E-06 | + | 15409937 | 15410087 | 0 | 1 | 150,                      | 0         | -5.14 | -4.9  | 2.03 | -1.7  | -3.4  |
| chr6  | 26215702 | 26216099 | HIST1H2BC | 4.00E-05 | - | 26215702 | 26216099 | 0 | 1 | 397,                      | 0         | -4.4  | -4.21 | 3.27 | -1.7  | -3.4  |
| chr11 | 85685944 | 85686145 | CCDC89    | 1.60E-18 | - | 85685944 | 85686145 | 0 | 1 | 201,                      | 0         | -17.8 | -14.5 | 6.6  | -1.69 | -3.39 |
| chr9  | 33038819 | 33038919 | DNAJA1    | 8.50E-05 | + | 33038819 | 33038919 | 0 | 1 | 100,                      | 0         | -4.07 | -3.89 | 1.55 | -1.69 | -3.38 |
| chr8  | 1.03E+08 | 1.03E+08 | AZIN1     | 2.90E-09 | - | 1.03E+08 | 1.03E+08 | 0 | 2 | 271,29,                   | 0,8354    | -8.54 | -7.94 | 8.83 | -1.69 | -3.38 |
| chr11 | 14891288 | 14891636 | CYP2R1    | 1.70E-06 | - | 14891288 | 14891636 | 0 | 1 | 348,                      | 0         | -5.78 | -4.53 | 5    | -1.69 | -3.38 |
| chr12 | 9695330  | 9695927  | CLEC2D    | 2.20E-07 | + | 9695330  | 9695927  | 0 | 1 | 597,                      | 0         | -6.65 | -6.28 | 10.5 | -1.68 | -3.37 |
| chr5  | 1.8E+08  | 1.8E+08  | MRNIP     | 4.40E-09 | - | 1.8E+08  | 1.8E+08  | 0 | 1 | 349,                      | 0         | -8.36 | -7.78 | 3    | -1.68 | -3.37 |
| chr10 | 78049164 | 78054819 | RPS24     | 8.70E-07 | + | 78049164 | 78054819 | 0 | 2 | 61,289,                   | 0,5366    | -6.06 | -5.74 | 7.5  | -1.66 | -3.33 |
| chr11 | 78218330 | 78218879 | GAB2      | 8.90E-05 | - | 78218330 | 78218879 | 0 | 1 | 549,                      | 0         | -4.05 | -3.87 | 8.62 | -1.65 | -3.32 |

|       |          |          |           |          |   |          |          |   |   |                |              |       |       |      |       |       |
|-------|----------|----------|-----------|----------|---|----------|----------|---|---|----------------|--------------|-------|-------|------|-------|-------|
| chr19 | 58573500 | 58574199 | MZF1-AS1  | 2.80E-06 | + | 58573500 | 58574199 | 0 | 1 | 699,           | 0            | -5.55 | -5.28 | 7.88 | -1.64 | -3.31 |
| chr20 | 63746800 | 63747299 | ZBTB46    | 0.0015   | - | 63746800 | 63747299 | 0 | 1 | 499,           | 0            | -2.81 | -2.68 | 4.11 | -1.63 | -3.3  |
| chr1  | 2.24E+08 | 2.24E+08 | WDR26     | 7.20E-10 | - | 2.24E+08 | 2.24E+08 | 0 | 1 | 201,           | 0            | -9.14 | -8.44 | 2.61 | -1.63 | -3.3  |
| chr2  | 99150537 | 99150888 | C2orf15   | 8.70E-07 | + | 99150537 | 99150888 | 0 | 1 | 351,           | 0            | -6.06 | -5.74 | 5.42 | -1.63 | -3.3  |
| chr6  | 1.59E+08 | 1.59E+08 | EZR       | 1.30E-05 | - | 1.59E+08 | 1.59E+08 | 0 | 2 | 127,124,       | 0,476        | -4.88 | -4.66 | 1.34 | -1.62 | -3.29 |
| chr3  | 46903599 | 46903749 | PTH1R     | 8.50E-07 | + | 46903599 | 46903749 | 0 | 1 | 150,           | 0            | -6.07 | -5.75 | 15   | -1.59 | -3.25 |
| chr1  | 93847369 | 93847566 | AL049796. | 0.00017  | + | 93847369 | 93847566 | 0 | 1 | 197,           | 0            | -3.76 | -2.73 | 3.25 | -1.59 | -3.25 |
| chr10 | 79826192 | 79826728 | AL135925. | 1.50E-05 | + | 79826192 | 79826728 | 0 | 1 | 536,           | 0            | -4.83 | -4.61 | 3.63 | -1.59 | -3.25 |
| chr9  | 33817607 | 33817757 | UBE2R2    | 2.40E-07 | + | 33817607 | 33817757 | 0 | 1 | 150,           | 0            | -6.62 | -6.26 | 1.23 | -1.58 | -3.24 |
| chr4  | 80202832 | 80203282 | PRDM8     | 5.00E-08 | + | 80202832 | 80203282 | 0 | 1 | 450,           | 0            | -7.3  | -5.85 | 7.8  | -1.58 | -3.24 |
| chr17 | 2593731  | 2593931  | PAFAH1B1  | 4.30E-07 | + | 2593731  | 2593931  | 0 | 1 | 200,           | 0            | -6.37 | -6.03 | 2.59 | -1.58 | -3.23 |
| chr17 | 39765799 | 39766249 | IKZF3     | 9.50E-05 | - | 39765799 | 39766249 | 0 | 1 | 450,           | 0            | -4.02 | -2.96 | 3.4  | -1.58 | -3.23 |
| chr2  | 11640441 | 11640741 | GREB1     | 7.40E-05 | + | 11640441 | 11640741 | 0 | 1 | 300,           | 0            | -4.13 | -3.95 | 6    | -1.58 | -3.23 |
| chr18 | 31068005 | 31068156 | DSC2      | 1.10E-09 | - | 31068005 | 31068156 | 0 | 1 | 151,           | 0            | -8.94 | -8.27 | 3.9  | -1.57 | -3.22 |
| chr7  | 45716681 | 45717380 | ADCY1     | 4.90E-08 | + | 45716681 | 45717380 | 0 | 1 | 699,           | 0            | -7.31 | -6.86 | 8.57 | -1.57 | -3.22 |
| chr9  | 2655511  | 2655712  | VLDLR     | 1.80E-06 | + | 2655511  | 2655712  | 0 | 1 | 201,           | 0            | -5.74 | -4.5  | 3.67 | -1.54 | -3.18 |
| chr2  | 1.53E+08 | 1.53E+08 | ARL6IP6   | 5.60E-06 | + | 1.53E+08 | 1.53E+08 | 0 | 1 | 151,           | 0            | -5.25 | -5    | 2.67 | -1.54 | -3.18 |
| chr2  | 2.41E+08 | 2.41E+08 | HDLBP     | 8.30E-06 | - | 2.41E+08 | 2.41E+08 | 0 | 1 | 151,           | 0            | -5.08 | -4.85 | 3    | -1.53 | -3.17 |
| chr18 | 77016393 | 77017446 | MBP       | 1.20E-09 | - | 77016393 | 77017446 | 0 | 2 | 875,24,        | 0,1029       | -8.93 | -8.26 | 7    | -1.53 | -3.17 |
| chr5  | 32074175 | 32074325 | PDZD2     | 0.00039  | + | 32074175 | 32074325 | 0 | 1 | 150,           | 0            | -3.41 | -2.41 | 5.6  | -1.53 | -3.16 |
| chr20 | 41029450 | 41084555 | TOP1      | 1.90E-10 | + | 41029450 | 41084555 | 0 | 7 | 5,97,124,56,   | 0,31943,4672 | -9.72 | -8.91 | 2.22 | -1.53 | -3.16 |
| chr2  | 48580755 | 48580905 | STON1-G1  | 1.40E-05 | + | 48580755 | 48580905 | 0 | 1 | 150,           | 0            | -4.86 | -4.64 | 5.78 | -1.52 | -3.15 |
| chr17 | 40342205 | 40342355 | RARA-AS1  | 1.80E-06 | - | 40342205 | 40342355 | 0 | 1 | 150,           | 0            | -5.74 | -4.5  | 2.08 | -1.52 | -3.15 |
| chr22 | 29489647 | 29491042 | NEFH      | 7.80E-07 | + | 29489647 | 29491042 | 0 | 1 | 1395,          | 0            | -6.11 | -5.79 | 4.76 | -1.51 | -3.14 |
| chrX  | 54173927 | 54182831 | FAM120C   | 1.90E-08 | - | 54173927 | 54182831 | 0 | 2 | 219,332,       | 0,8572       | -6.73 | -6.22 | 3.1  | -1.51 | -3.14 |
| chr3  | 1.3E+08  | 1.3E+08  | LINC02021 | 0.00068  | + | 1.3E+08  | 1.3E+08  | 0 | 1 | 199,           | 0            | -3.17 | -3.03 | 9.43 | -1.5  | -3.13 |
| chr15 | 90271260 | 90272158 | AC091167. | 5.00E-15 | + | 90271260 | 90272158 | 0 | 1 | 898,           | 0            | -14.3 | -12.5 | 4.29 | -1.5  | -3.13 |
| chr19 | 57958532 | 57961399 | C19orf18  | 2.00E-14 | - | 57958532 | 57961399 | 0 | 2 | 185,9,         | 0,2858       | -13.7 | -11   | 5.83 | -1.5  | -3.12 |
| chr10 | 79826243 | 79826594 | NUTM2B-   | 3.30E-10 | - | 79826243 | 79826594 | 0 | 1 | 351,           | 0            | -9.48 | -8.71 | 3.5  | -1.5  | -3.12 |
| chr6  | 10529388 | 10529837 | GCNT2     | 5.00E-07 | + | 10529388 | 10529837 | 0 | 1 | 449,           | 0            | -6.3  | -5.97 | 5.17 | -1.48 | -3.1  |
| chr4  | 80286434 | 80286685 | FGF5      | 3.00E-06 | + | 80286434 | 80286685 | 0 | 1 | 251,           | 0            | -5.52 | -4.3  | 4    | -1.48 | -3.1  |
| chr22 | 36266835 | 36267084 | APOL1     | 1.40E-05 | + | 36266835 | 36267084 | 0 | 1 | 249,           | 0            | -4.86 | -4.64 | 2.72 | -1.47 | -3.09 |
| chr19 | 48868267 | 48868617 | PLEKHA4   | 1.30E-25 | - | 48868267 | 48868617 | 0 | 1 | 350,           | 0            | -24.9 | -22.4 | 3.59 | -1.47 | -3.09 |
| chr4  | 1.55E+08 | 1.55E+08 | MAP9      | 2.80E-05 | - | 1.55E+08 | 1.55E+08 | 0 | 2 | 126,124,       | 0,247        | -4.56 | -4.35 | 3.5  | -1.47 | -3.09 |
| chr18 | 62717131 | 62717232 | PHLPP1    | 9.50E-10 | + | 62717131 | 62717232 | 0 | 1 | 101,           | 0            | -9.02 | -8.34 | 4.33 | -1.47 | -3.08 |
| chr3  | 84959030 | 84959231 | CADM2     | 1.00E-07 | + | 84959030 | 84959231 | 0 | 1 | 201,           | 0            | -7    | -5.6  | 2.5  | -1.46 | -3.08 |
| chr1  | 1.84E+08 | 1.84E+08 | TSEN15    | 3.30E-05 | + | 1.84E+08 | 1.84E+08 | 0 | 2 | 29,122,        | 0,565        | -4.48 | -3.38 | 2.8  | -1.47 | -3.08 |
| chr20 | 62812317 | 62813852 | OGFR      | 1.00E-13 | + | 62812317 | 62813852 | 0 | 1 | 1535,          | 0            | -13   | -11.5 | 3.53 | -1.46 | -3.07 |
| chr1  | 2.15E+08 | 2.15E+08 | CENPF     | 4.00E-19 | + | 2.15E+08 | 2.15E+08 | 0 | 1 | 649,           | 0            | -18.4 | -16.2 | 3.32 | -1.46 | -3.07 |
| chr15 | 54012719 | 54012920 | UNC13C    | 5.50E-06 | + | 54012719 | 54012920 | 0 | 1 | 201,           | 0            | -5.26 | -5.01 | 2.44 | -1.46 | -3.07 |
| chr15 | 99799966 | 99800116 | DNM1P46   | 0.0044   | - | 99799966 | 99800116 | 0 | 1 | 150,           | 0            | -2.36 | -1.44 | 3.17 | -1.46 | -3.07 |
| chr2  | 3568954  | 3569105  | AC108488. | 0.0039   | - | 3568954  | 3569105  | 0 | 1 | 151,           | 0            | -2.41 | -2.29 | 2.35 | -1.46 | -3.07 |
| chr15 | 44537223 | 44550714 | EIF3J     | 2.30E-08 | + | 44537223 | 44550714 | 0 | 3 | 14,104,32,     | 0,100,13459  | -7.64 | -7.16 | 1.23 | -1.46 | -3.06 |
| chr2  | 2.31E+08 | 2.31E+08 | NCL       | 6.30E-13 | - | 2.31E+08 | 2.31E+08 | 0 | 3 | 15,198,335,    | 0,119,990    | -12.2 | -10.9 | 1.38 | -1.46 | -3.06 |
| chr5  | 1.5E+08  | 1.5E+08  | TCOF1     | 4.00E-12 | + | 1.5E+08  | 1.5E+08  | 0 | 4 | 504,98,49,990, | 2015,2683,3  | -11.4 | -10.2 | 1.89 | -1.45 | -3.05 |
| chr22 | 24898256 | 24898356 | SGSM1     | 4.40E-05 | + | 24898256 | 24898356 | 0 | 1 | 100,           | 0            | -4.36 | -3.27 | 3.38 | -1.45 | -3.05 |
| chr4  | 1.7E+08  | 1.7E+08  | CLCN3     | 4.10E-09 | + | 1.7E+08  | 1.7E+08  | 0 | 3 | 45,76,578,     | 0,4541,6656  | -8.39 | -7.81 | 3.71 | -1.44 | -3.04 |
| chr17 | 44674071 | 44674172 | MEIOC     | 4.30E-06 | + | 44674071 | 44674172 | 0 | 1 | 101,           | 0            | -5.37 | -5.11 | 6    | -1.44 | -3.04 |
| chr2  | 1.66E+08 | 1.66E+08 | CSRN3     | 4.00E-08 | + | 1.66E+08 | 1.66E+08 | 0 | 2 | 13,287,        | 0,2105       | -7.4  | -6.95 | 5.75 | -1.44 | -3.03 |
| chr19 | 16077000 | 16077149 | AC008894. | 8.30E-07 | - | 16077000 | 16077149 | 0 | 1 | 149,           | 0            | -6.08 | -5.77 | 1.71 | -1.43 | -3.02 |
| chr6  | 1.57E+08 | 1.57E+08 | ARID1B    | 2.50E-11 | + | 1.57E+08 | 1.57E+08 | 0 | 1 | 801,           | 0            | -10.6 | -9.58 | 5.12 | -1.42 | -3.01 |

|       |          |          |           |          |   |          |          |   |   |                            |           |   |       |       |      |       |       |
|-------|----------|----------|-----------|----------|---|----------|----------|---|---|----------------------------|-----------|---|-------|-------|------|-------|-------|
| chr4  | 1.41E+08 | 1.41E+08 | RNF150    | 0.001    | - | 1.41E+08 | 1.41E+08 | 0 | 2 | 153,97,                    | 0,42826   |   | -3    | -2.86 | 8.83 | -1.41 | -3    |
| chr17 | 8369085  | 8369733  | AC135178  | 3.20E-05 | - | 8369085  | 8369733  | 0 | 1 | 648,                       |           | 0 | -4.49 | -4.3  | 7.83 | -1.41 | -3    |
| chr10 | 68959850 | 68960199 | DDX21     | 3.00E-10 | + | 68959850 | 68960199 | 0 | 1 | 349,                       |           | 0 | -9.53 | -8.75 | 1.73 | -1.4  | -2.99 |
| chr2  | 85606793 | 85607042 | C2orf68   | 3.10E-06 | - | 85606793 | 85607042 | 0 | 1 | 249,                       |           | 0 | -5.51 | -5.24 | 2.25 | -1.41 | -2.99 |
| chr19 | 40191525 | 40191775 | ZNF3K10   | 7.90E-05 | + | 40191525 | 40191775 | 0 | 1 | 250,                       |           | 0 | -4.1  | -3.92 | 2.64 | -1.4  | -2.98 |
| chr19 | 57445605 | 57445855 | MZF749    | 1.10E-05 | + | 57445605 | 57445855 | 0 | 1 | 250,                       |           | 0 | -4.95 | -4.73 | 2.5  | -1.4  | -2.98 |
| chr9  | 2655061  | 2655262  | VLDLR     | 1.80E-06 | + | 2655061  | 2655262  | 0 | 1 | 201,                       |           | 0 | -5.74 | -4.5  | 4.71 | -1.39 | -2.97 |
| chr2  | 1.78E+08 | 1.78E+08 | TTC30B    | 2.00E-13 | - | 1.78E+08 | 1.78E+08 | 0 | 1 | 199,                       |           | 0 | -12.7 | -10.2 | 3.67 | -1.39 | -2.97 |
| chr12 | 57780320 | 57780765 | EEF1AKMT  | 1.80E-06 | + | 57780320 | 57780765 | 0 | 1 | 445,                       |           | 0 | -5.74 | -5.46 | 5.92 | -1.38 | -2.96 |
| chr14 | 41588040 | 41588141 | AL121821  | 5.50E-08 | - | 41588040 | 41588141 | 0 | 1 | 101,                       |           | 0 | -7.26 | -5.82 | 2    | -1.38 | -2.96 |
| chr19 | 14073345 | 14073935 | MISP3     | 0.00014  | + | 14073345 | 14073935 | 0 | 1 | 590,                       |           | 0 | -3.85 | -3.69 | 4.8  | -1.38 | -2.95 |
| chr1  | 1.55E+08 | 1.55E+08 | KCNH3     | 2.00E-05 | - | 1.55E+08 | 1.55E+08 | 0 | 1 | 151,                       |           | 0 | -4.7  | -3.58 | 3.8  | -1.38 | -2.95 |
| chr17 | 16470905 | 16471155 | SNHG29    | 0.0018   | + | 16470905 | 16471155 | 0 | 1 | 250,                       |           | 0 | -2.74 | -2.61 | 7.67 | -1.38 | -2.95 |
| chr1  | 50968766 | 50974189 | CDKN2C    | 5.40E-10 | + | 50968766 | 50974189 | 0 | 3 | 1133,253,29'0,1478,5126    |           |   | -9.27 | -8.55 | 4.43 | -1.37 | -2.94 |
| chr22 | 31944571 | 31944771 | YWHAH     | 5.00E-11 | + | 31944571 | 31944771 | 0 | 1 | 200,                       |           | 0 | -10.3 | -9.41 | 1.34 | -1.37 | -2.94 |
| chr9  | 35609342 | 35609941 | TESK1     | 7.20E-09 | + | 35609342 | 35609941 | 0 | 1 | 599,                       |           | 0 | -8.14 | -7.59 | 8.22 | -1.36 | -2.93 |
| chr15 | 32615542 | 32615990 | ARHGAP1   | 2.60E-10 | + | 32615542 | 32615990 | 0 | 1 | 448,                       |           | 0 | -9.58 | -8.79 | 1.98 | -1.37 | -2.93 |
| chr9  | 88544432 | 88544583 | NXNL2     | 0.001    | + | 88544432 | 88544583 | 0 | 1 | 151,                       |           | 0 | -2.98 | -2.01 | 5    | -1.35 | -2.91 |
| chr12 | 9695433  | 9695929  | AC007068  | 1.60E-06 | + | 9695433  | 9695929  | 0 | 1 | 496,                       |           | 0 | -5.8  | -5.51 | 9.25 | -1.35 | -2.91 |
| chr5  | 43041872 | 43042221 | AC025171  | 9.10E-05 | + | 43041872 | 43042221 | 0 | 1 | 349,                       |           | 0 | -4.04 | -3.87 | 3.92 | -1.35 | -2.91 |
| chr15 | 23565972 | 23567070 | MKRN3     | 1.00E-10 | + | 23565972 | 23567070 | 0 | 1 | 1098,                      |           | 0 | -10   | -9.14 | 6.6  | -1.34 | -2.9  |
| chr11 | 1.2E+08  | 1.2E+08  | TMEM136   | 3.90E-09 | + | 1.2E+08  | 1.2E+08  | 0 | 1 | 597,                       |           | 0 | -8.41 | -7.83 | 8.6  | -1.34 | -2.9  |
| chr22 | 29438474 | 29438674 | RFPL1S    | 1.50E-05 | - | 29438474 | 29438674 | 0 | 1 | 200,                       |           | 0 | -4.83 | -3.7  | 4    | -1.34 | -2.9  |
| chr9  | 1.3E+08  | 1.3E+08  | DCS1      | 6.30E-09 | + | 1.3E+08  | 1.3E+08  | 0 | 1 | 399,                       |           | 0 | -8.2  | -7.64 | 4.5  | -1.34 | -2.89 |
| chr1  | 93346255 | 93346755 | DR1       | 3.70E-10 | + | 93346255 | 93346755 | 0 | 1 | 500,                       |           | 0 | -9.43 | -8.67 | 3.08 | -1.33 | -2.89 |
| chr4  | 1.33E+08 | 1.33E+08 | PCDH10    | 1.60E-11 | + | 1.33E+08 | 1.33E+08 | 0 | 1 | 401,                       |           | 0 | -10.8 | -9.76 | 4.75 | -1.33 | -2.89 |
| chr4  | 3766497  | 3767098  | ADRA2C    | 0.00031  | + | 3766497  | 3767098  | 0 | 1 | 601,                       |           | 0 | -3.51 | -2.5  | 3.8  | -1.33 | -2.89 |
| chr17 | 48607719 | 48608296 | HOXB7     | 2.80E-08 | - | 48607719 | 48608296 | 0 | 2 | 376,68,                    | 0,509     |   | -7.55 | -7.07 | 4.17 | -1.33 | -2.89 |
| chr19 | 14072855 | 14073150 | MISP3     | 0.00014  | + | 14072855 | 14073150 | 0 | 1 | 295,                       |           | 0 | -3.85 | -3.69 | 2.67 | -1.33 | -2.88 |
| chr15 | 74598549 | 74598900 | CLK3      | 0.00071  | + | 74598549 | 74598900 | 0 | 1 | 351,                       |           | 0 | -3.15 | -3.01 | 8.25 | -1.33 | -2.88 |
| chr22 | 41958348 | 41958592 | LINC00634 | 9.10E-05 | + | 41958348 | 41958592 | 0 | 1 | 244,                       |           | 0 | -4.04 | -3.87 | 7.57 | -1.33 | -2.88 |
| chr18 | 80159626 | 80160375 | PAR6G     | 3.20E-06 | - | 80159626 | 80160375 | 0 | 1 | 749,                       |           | 0 | -5.5  | -5.23 | 9.25 | -1.32 | -2.87 |
| chr19 | 56567517 | 56567817 | ZNF470    | 4.20E-07 | + | 56567517 | 56567817 | 0 | 1 | 300,                       |           | 0 | -6.38 | -6.03 | 4.62 | -1.32 | -2.87 |
| chr15 | 65654077 | 65654377 | SLC24A1   | 2.70E-05 | + | 65654077 | 65654377 | 0 | 1 | 300,                       |           | 0 | -4.57 | -4.36 | 11.2 | -1.32 | -2.86 |
| chr3  | 73383528 | 73383728 | PDZRN3    | 5.20E-05 | - | 73383528 | 73383728 | 0 | 1 | 200,                       |           | 0 | -4.28 | -4.09 | 8.75 | -1.31 | -2.86 |
| chr2  | 2.31E+08 | 2.31E+08 | ARMC9     | 4.20E-05 | + | 2.31E+08 | 2.31E+08 | 0 | 1 | 250,                       |           | 0 | -4.38 | -3.29 | 3.6  | -1.32 | -2.86 |
| chr2  | 2.27E+08 | 2.27E+08 | IRS1      | 5.10E-07 | - | 2.27E+08 | 2.27E+08 | 0 | 1 | 150,                       |           | 0 | -6.29 | -5.95 | 7.5  | -1.31 | -2.85 |
| chr15 | 84402784 | 84402935 | DNM1P51   | 2.10E-05 | - | 84402784 | 84402935 | 0 | 1 | 151,                       |           | 0 | -4.67 | -3.55 | 2.75 | -1.31 | -2.85 |
| chr8  | 76704354 | 76704504 | ZFH4      | 0.0027   | + | 76704354 | 76704504 | 0 | 1 | 150,                       |           | 0 | -2.57 | -1.63 | 2.4  | -1.28 | -2.82 |
| chr19 | 38730584 | 38730734 | CAPN12    | 2.30E-06 | - | 38730584 | 38730734 | 0 | 1 | 150,                       |           | 0 | -5.63 | -5.35 | 1.82 | -1.27 | -2.8  |
| chr7  | 66740070 | 66740768 | RABGEF1   | 1.70E-08 | + | 66740070 | 66740768 | 0 | 1 | 698,                       |           | 0 | -7.77 | -7.27 | 4.75 | -1.26 | -2.79 |
| chr17 | 8369059  | 8370146  | KRBA2     | 1.30E-06 | - | 8369059  | 8370146  | 0 | 1 | 1087,                      |           | 0 | -5.9  | -5.6  | 10.6 | -1.26 | -2.79 |
| chr4  | 16256402 | 16256501 | TAPT1-AS  | 1.30E-05 | + | 16256402 | 16256501 | 0 | 1 | 99,                        |           | 0 | -4.9  | -3.76 | 1.5  | -1.26 | -2.79 |
| chr5  | 1.77E+08 | 1.77E+08 | DBN1      | 1.90E-10 | - | 1.77E+08 | 1.77E+08 | 0 | 3 | 172,78,49,                 | 0,364,590 |   | -9.73 | -8.91 | 1.52 | -1.25 | -2.77 |
| chr3  | 1.02E+08 | 1.02E+08 | RPL24     | 2.60E-09 | - | 1.02E+08 | 1.02E+08 | 0 | 1 | 248,                       |           | 0 | -8.59 | -7.98 | 6.25 | -1.24 | -2.77 |
| chr19 | 46392881 | 46392981 | PPP5C     | 3.20E-06 | + | 46392881 | 46392981 | 0 | 1 | 100,                       |           | 0 | -5.49 | -5.22 | 4.75 | -1.24 | -2.76 |
| chr12 | 26124740 | 26124889 | BHLHE41   | 6.50E-07 | - | 26124740 | 26124889 | 0 | 1 | 149,                       |           | 0 | -6.19 | -4.89 | 2.45 | -1.24 | -2.76 |
| chr2  | 99368563 | 99379028 | EIF5B     | 6.30E-13 | + | 99368563 | 99379028 | 0 | 6 | 28,94,2,75,2'0,828,2574,30 |           |   | -12.2 | -10.8 | 1.89 | -1.24 | -2.76 |
| chr15 | 90271246 | 90272146 | NGRN      | 2.00E-11 | + | 90271246 | 90272146 | 0 | 1 | 900,                       |           | 0 | -10.7 | -9.72 | 3.81 | -1.24 | -2.76 |
| chr17 | 38466392 | 38466693 | ARHGAP2   | 0.00085  | + | 38466392 | 38466693 | 0 | 1 | 301,                       |           | 0 | -3.07 | -2.1  | 3.75 | -1.24 | -2.76 |
| chr4  | 1.19E+08 | 1.19E+08 | GTF2IP12  | 4.40E-06 | - | 1.19E+08 | 1.19E+08 | 0 | 1 | 151,                       |           | 0 | -5.36 | -4.16 | 4.33 | -1.24 | -2.76 |

|       |          |          |          |          |   |          |          |   |   |            |            |       |       |      |       |       |
|-------|----------|----------|----------|----------|---|----------|----------|---|---|------------|------------|-------|-------|------|-------|-------|
| chr19 | 18541931 | 18542031 | FKBP8    | 5.90E-07 | - | 18541931 | 18542031 | 0 | 1 | 100,       | 0          | -6.23 | -5.9  | 1.28 | -1.23 | -2.75 |
| chr16 | 2708236  | 2708584  | KCTD5    | 1.10E-06 | + | 2708236  | 2708584  | 0 | 1 | 348,       | 0          | -5.96 | -5.65 | 3.35 | -1.23 | -2.75 |
| chr12 | 53994597 | 53995041 | HOXC-AS1 | 0.00015  | - | 53994597 | 53995041 | 0 | 1 | 444,       | 0          | -3.83 | -3.67 | 5.5  | -1.24 | -2.75 |
| chr4  | 40167397 | 40167686 | AC095057 | 9.10E-07 | + | 40167397 | 40167686 | 0 | 1 | 289,       | 0          | -6.04 | -4.76 | 4    | -1.23 | -2.75 |
| chr3  | 42658686 | 42659386 | ZBTB47   | 2.00E-09 | + | 42658686 | 42659386 | 0 | 1 | 700,       | 0          | -8.7  | -8.07 | 6.2  | -1.23 | -2.74 |
| chr2  | 2.19E+08 | 2.19E+08 | CDK5R2   | 0.00048  | + | 2.19E+08 | 2.19E+08 | 0 | 1 | 296,       | 0          | -3.32 | -2.33 | 5    | -1.23 | -2.74 |
| chr15 | 40938032 | 40938231 | DLL4     | 1.10E-05 | + | 40938032 | 40938231 | 0 | 1 | 199,       | 0          | -4.94 | -4.72 | 9.67 | -1.22 | -2.73 |
| chr10 | 53808999 | 53809150 | PCDH15   | 0.0011   | - | 53808999 | 53809150 | 0 | 1 | 151,       | 0          | -2.97 | -2.84 | 4    | -1.22 | -2.73 |
| chr1  | 1.81E+08 | 1.81E+08 | IER5     | 3.20E-15 | + | 1.81E+08 | 1.81E+08 | 0 | 1 | 1596,      | 0          | -14.5 | -12.7 | 6.39 | -1.22 | -2.73 |
| chr10 | 25599233 | 25599633 | GPR158   | 1.70E-06 | + | 25599233 | 25599633 | 0 | 1 | 400,       | 0          | -5.77 | -4.53 | 3.5  | -1.21 | -2.72 |
| chr12 | 55927418 | 55928304 | DGKA     | 1.90E-06 | + | 55927418 | 55928304 | 0 | 2 | 201,50,    | 0,836      | -5.72 | -5.44 | 3.29 | -1.2  | -2.7  |
| chr2  | 2.32E+08 | 2.32E+08 | PTMA     | 2.30E-09 | + | 2.32E+08 | 2.32E+08 | 0 | 2 | 187,62,    | 0,1216     | -8.63 | -8.01 | 1.18 | -1.2  | -2.7  |
| chr1  | 44040039 | 44040189 | AL139220 | 1.30E-08 | + | 44040039 | 44040189 | 0 | 1 | 150,       | 0          | -6.34 | -6.34 | 4.5  | -1.2  | -2.7  |
| chr8  | 76856054 | 76856254 | ZFHX4    | 5.00E-04 | + | 76856054 | 76856254 | 0 | 1 | 200,       | 0          | -3.3  | -2.31 | 3.38 | -1.19 | -2.69 |
| chr5  | 1.8E+08  | 1.8E+08  | CNOT6    | 2.40E-10 | + | 1.8E+08  | 1.8E+08  | 0 | 1 | 249,       | 0          | -9.62 | -8.82 | 1.65 | -1.19 | -2.69 |
| chr19 | 32675846 | 32676597 | ANKRD27  | 2.60E-09 | - | 32675846 | 32676597 | 0 | 1 | 751,       | 0          | -8.58 | -7.97 | 7.75 | -1.19 | -2.68 |
| chr17 | 82460393 | 82460593 | NARF     | 0.0033   | + | 82460393 | 82460593 | 0 | 1 | 200,       | 0          | -2.48 | -1.55 | 3.5  | -1.19 | -2.68 |
| chr19 | 20545548 | 20551154 | AC008554 | 2.80E-09 | - | 20545548 | 20551154 | 0 | 2 | 428,70,    | 0,5536     | -8.55 | -6.91 | 4.83 | -1.18 | -2.67 |
| chr4  | 1.12E+08 | 1.12E+08 | AP1AR    | 4.00E-09 | + | 1.12E+08 | 1.12E+08 | 0 | 2 | 139,12,    | 0,21172    | -8.4  | -7.82 | 1.74 | -1.17 | -2.66 |
| chr16 | 87603307 | 87603457 | JPH3     | 0.0051   | + | 87603307 | 87603457 | 0 | 1 | 150,       | 0          | -2.29 | -1.38 | 5.25 | -1.17 | -2.66 |
| chr17 | 61399163 | 61399598 | TBX2-AS1 | 6.20E-05 | - | 61399163 | 61399598 | 0 | 1 | 435,       | 0          | -4.21 | -4.02 | 2.29 | -1.17 | -2.66 |
| chr5  | 1.38E+08 | 1.38E+08 | EGR1     | 4.90E-06 | + | 1.38E+08 | 1.38E+08 | 0 | 1 | 200,       | 0          | -5.31 | -5.06 | 4.61 | -1.16 | -2.65 |
| chr11 | 59145001 | 59145351 | FAM111A  | 1.80E-07 | + | 59145001 | 59145351 | 0 | 1 | 350,       | 0          | -6.74 | -6.36 | 3.71 | -1.17 | -2.65 |
| chr16 | 88652381 | 88652531 | MVD      | 0.002    | - | 88652381 | 88652531 | 0 | 1 | 150,       | 0          | -2.7  | -2.57 | 2.03 | -1.16 | -2.65 |
| chr2  | 1.53E+08 | 1.53E+08 | PRPF40A  | 1.50E-06 | - | 1.53E+08 | 1.53E+08 | 0 | 1 | 101,       | 0          | -5.83 | -4.58 | 1.38 | -1.17 | -2.65 |
| chr16 | 14330666 | 14330817 | MIR193BH | 9.10E-06 | + | 14330666 | 14330817 | 0 | 1 | 151,       | 0          | -5.04 | -3.88 | 4.6  | -1.16 | -2.65 |
| chr7  | 2234679  | 2235527  | MRM2     | 7.90E-12 | - | 2234679  | 2235527  | 0 | 1 | 848,       | 0          | -11.1 | -9.98 | 6.8  | -1.16 | -2.64 |
| chr19 | 10116304 | 10116404 | EIF3G    | 8.90E-07 | - | 10116304 | 10116404 | 0 | 1 | 100,       | 0          | -6.05 | -4.78 | 3    | -1.16 | -2.64 |
| chr11 | 94998289 | 94998388 | KDM4D    | 0.00025  | + | 94998289 | 94998388 | 0 | 1 | 99,        | 0          | -3.61 | -2.6  | 3.75 | -1.16 | -2.64 |
| chr5  | 1.41E+08 | 1.41E+08 | PCDHGA1  | 5.40E-05 | + | 1.41E+08 | 1.41E+08 | 0 | 1 | 150,       | 0          | -4.27 | -3.19 | 3    | -1.16 | -2.64 |
| chr13 | 95990945 | 95991045 | UGGT2    | 4.90E-05 | - | 95990945 | 95991045 | 0 | 1 | 100,       | 0          | -4.31 | -3.22 | 3.4  | -1.15 | -2.63 |
| chr19 | 49651099 | 49652191 | SCAF1    | 3.40E-08 | + | 49651099 | 49652191 | 0 | 1 | 1092,      | 0          | -7.47 | -7.01 | 4.28 | -1.15 | -2.63 |
| chr14 | 1.06E+08 | 1.06E+08 | IGHV3-21 | 3.20E-22 | - | 1.06E+08 | 1.06E+08 | 0 | 2 | 19,125,    | 0,120      | -21.5 | -19.1 | 1.22 | -1.15 | -2.63 |
| chr3  | 48661735 | 48662486 | CELSR3   | 1.40E-06 | - | 48661735 | 48662486 | 0 | 1 | 751,       | 0          | -5.86 | -5.56 | 5.5  | -1.15 | -2.62 |
| chr13 | 32403004 | 32403658 | N4BP2L1  | 5.00E-07 | - | 32403004 | 32403658 | 0 | 2 | 196,3,     | 0,651      | -6.3  | -4.99 | 4.5  | -1.15 | -2.62 |
| chr4  | 1.39E+08 | 1.39E+08 | NAA15    | 9.10E-07 | + | 1.39E+08 | 1.39E+08 | 0 | 2 | 34,166,    | 0,8307     | -6.04 | -5.73 | 1.96 | -1.15 | -2.62 |
| chr5  | 1.39E+08 | 1.39E+08 | PROB1    | 0.0043   | - | 1.39E+08 | 1.39E+08 | 0 | 1 | 150,       | 0          | -2.37 | -1.46 | 3.5  | -1.15 | -2.62 |
| chr15 | 77918947 | 77919196 | AC104758 | 1.70E-06 | - | 77918947 | 77919196 | 0 | 1 | 249,       | 0          | -5.77 | -4.52 | 4    | -1.15 | -2.62 |
| chr22 | 41245710 | 41246111 | RANGAP1  | 1.10E-07 | - | 41245710 | 41246111 | 0 | 1 | 401,       | 0          | -6.97 | -6.56 | 2.98 | -1.14 | -2.61 |
| chr5  | 56815598 | 56815799 | MAP3K1   | 4.80E-08 | + | 56815598 | 56815799 | 0 | 1 | 201,       | 0          | -7.32 | -6.87 | 4.17 | -1.14 | -2.6  |
| chr17 | 7562017  | 7563118  | SENP3    | 1.30E-09 | + | 7562017  | 7563118  | 0 | 2 | 246,53,    | 0,1048     | -8.87 | -8.22 | 1.67 | -1.13 | -2.6  |
| chr7  | 1058114  | 1058215  | GPR146   | 0.00095  | + | 1058114  | 1058215  | 0 | 1 | 101,       | 0          | -3.02 | -2.05 | 5.8  | -1.13 | -2.6  |
| chrM  | 14243    | 14578    | MT-ND6   | 5.00E-70 | - | 14243    | 14578    | 0 | 1 | 335,       | 0          | -69.3 | -65.9 | 1.13 | -1.13 | -2.6  |
| chr2  | 1.09E+08 | 1.09E+08 | RANBP2   | 7.40E-08 | + | 1.09E+08 | 1.09E+08 | 0 | 1 | 301,       | 0          | -7.13 | -6.7  | 3.33 | -1.12 | -2.59 |
| chr17 | 147062   | 147212   | DOC2B    | 8.90E-05 | - | 147062   | 147212   | 0 | 1 | 150,       | 0          | -4.05 | -2.99 | 6    | -1.12 | -2.59 |
| chr19 | 35902573 | 35903879 | HCST     | 5.90E-08 | + | 35902573 | 35903879 | 0 | 3 | 63,66,108, | 0,777,1198 | -7.23 | -6.8  | 1.94 | -1.12 | -2.58 |
| chr1  | 26170628 | 26170824 | ZNF593   | 4.50E-06 | + | 26170628 | 26170824 | 0 | 1 | 196,       | 0          | -5.35 | -5.09 | 2.82 | -1.12 | -2.58 |
| chr16 | 28864144 | 28864294 | SH2B1    | 9.50E-06 | + | 28864144 | 28864294 | 0 | 1 | 150,       | 0          | -5.02 | -3.86 | 3.44 | -1.12 | -2.58 |
| chr18 | 36779141 | 36779442 | TPGS2    | 6.60E-05 | - | 36779141 | 36779442 | 0 | 1 | 301,       | 0          | -4.18 | -3.11 | 2.8  | -1.11 | -2.57 |
| chr5  | 1.8E+08  | 1.8E+08  | SQSTM1   | 2.80E-07 | + | 1.8E+08  | 1.8E+08  | 0 | 1 | 351,       | 0          | -6.56 | -6.21 | 2.81 | -1.11 | -2.57 |
| chr7  | 2234682  | 2235532  | AC069288 | 5.00E-09 | - | 2234682  | 2235532  | 0 | 1 | 850,       | 0          | -8.3  | -7.73 | 7.89 | -1.11 | -2.57 |

|       |          |          |           |          |   |          |          |   |   |                           |        |       |       |      |       |       |
|-------|----------|----------|-----------|----------|---|----------|----------|---|---|---------------------------|--------|-------|-------|------|-------|-------|
| chr16 | 3141306  | 3141606  | ZNF213    | 1.90E-07 | + | 3141306  | 3141606  | 0 | 1 | 300,                      | 0      | -6.72 | -6.34 | 3.5  | -1.11 | -2.56 |
| chr8  | 27609063 | 27610651 | CLU       | 5.00E-11 | - | 27609063 | 27610651 | 0 | 2 | 23,177,                   | 0,1411 | -10.3 | -9.35 | 1.9  | -1.11 | -2.56 |
| chr17 | 63418369 | 63420560 | TANC2     | 2.70E-08 | + | 63418369 | 63420560 | 0 | 2 | 38,562,                   | 0,1629 | -7.57 | -7.1  | 6    | -1.11 | -2.56 |
| chr18 | 35258024 | 35258324 | ZNF397    | 0.00055  | + | 35258024 | 35258324 | 0 | 1 | 300,                      | 0      | -3.26 | -2.27 | 3.83 | -1.11 | -2.56 |
| chr14 | 73522546 | 73522795 | HEATR4    | 4.80E-05 | - | 73522546 | 73522795 | 0 | 1 | 249,                      | 0      | -4.32 | -3.24 | 3.6  | -1.11 | -2.56 |
| chr14 | 34795738 | 34802860 | BAZ1A     | 6.20E-10 | - | 34795738 | 34802860 | 0 | 4 | 27,167,100,70,4485,5355,7 | 0      | -9.21 | -8.49 | 3.07 | -1.11 | -2.56 |
| chrX  | 41347686 | 41347937 | DDX3X     | 0.00015  | + | 41347686 | 41347937 | 0 | 1 | 251,                      | 0      | -3.83 | -3.67 | 2    | -1.11 | -2.56 |
| chr14 | 39181538 | 39181885 | PNN       | 5.00E-11 | + | 39181538 | 39181885 | 0 | 1 | 347,                      | 0      | -10.3 | -9.4  | 2.03 | -1.1  | -2.55 |
| chr6  | 27133541 | 27133642 | HIST1H2A  | 7.60E-08 | + | 27133541 | 27133642 | 0 | 1 | 101,                      | 0      | -7.12 | -5.7  | 2.2  | -1.1  | -2.55 |
| chr1  | 2.28E+08 | 2.28E+08 | C1orf35   | 0.00014  | - | 2.28E+08 | 2.28E+08 | 0 | 1 | 150,                      | 0      | -3.84 | -3.67 | 4.6  | -1.09 | -2.54 |
| chr2  | 2.16E+08 | 2.16E+08 | TMEM169   | 8.30E-08 | + | 2.16E+08 | 2.16E+08 | 0 | 1 | 200,                      | 0      | -7.08 | -5.67 | 5.25 | -1.09 | -2.54 |
| chr11 | 59151801 | 59153097 | FAM111A   | 2.00E-11 | + | 59151801 | 59153097 | 0 | 1 | 1296,                     | 0      | -10.7 | -9.71 | 6    | -1.09 | -2.54 |
| chr17 | 45148551 | 45150351 | HEXIM1    | 5.00E-16 | + | 45148551 | 45150351 | 0 | 1 | 1800,                     | 0      | -15.3 | -13.3 | 5.7  | -1.09 | -2.54 |
| chrX  | 71096246 | 71096597 | FOXO4     | 0.00013  | + | 71096246 | 71096597 | 0 | 1 | 351,                      | 0      | -3.88 | -3.71 | 3.33 | -1.09 | -2.53 |
| chr14 | 23321487 | 23321835 | PABPN1    | 1.00E-11 | + | 23321487 | 23321835 | 0 | 1 | 348,                      | 0      | -11   | -9.89 | 2.64 | -1.08 | -2.52 |
| chr5  | 1.35E+08 | 1.35E+08 | DDX46     | 2.00E-11 | + | 1.35E+08 | 1.35E+08 | 0 | 5 | 75,144,97,160,2899,6885,9 | 0      | -10.7 | -9.71 | 1.93 | -1.08 | -2.52 |
| chr21 | 46244862 | 46246321 | MCM3AP    | 2.30E-07 | - | 46244862 | 46246321 | 0 | 2 | 335,15,                   | 0,1444 | -6.63 | -6.26 | 3.43 | -1.08 | -2.52 |
| chr11 | 61795789 | 61796489 | FEN1      | 4.40E-08 | + | 61795789 | 61796489 | 0 | 1 | 700,                      | 0      | -7.36 | -6.91 | 3.79 | -1.08 | -2.51 |
| chr14 | 93206869 | 93207016 | GON7      | 0.00017  | - | 93206869 | 93207016 | 0 | 1 | 147,                      | 0      | -3.77 | -3.61 | 2.04 | -1.08 | -2.51 |
| chr18 | 3596936  | 3597232  | DLGAP1-A  | 2.60E-09 | + | 3596936  | 3597232  | 0 | 1 | 296,                      | 0      | -8.59 | -7.98 | 2.57 | -1.08 | -2.51 |
| chr19 | 14718395 | 14719292 | ZNF333    | 4.90E-10 | + | 14718395 | 14719292 | 0 | 1 | 897,                      | 0      | -9.31 | -8.58 | 4.73 | -1.07 | -2.5  |
| chr3  | 1.25E+08 | 1.25E+08 | HEG1      | 3.60E-06 | - | 1.25E+08 | 1.25E+08 | 0 | 2 | 658,40,                   | 0,899  | -5.44 | -5.17 | 11.5 | -1.07 | -2.5  |
| chr22 | 27985850 | 27986051 | TTC28-AS  | 0.00049  | + | 27985850 | 27986051 | 0 | 1 | 201,                      | 0      | -3.31 | -2.32 | 6.4  | -1.07 | -2.5  |
| chr10 | 62198027 | 62198128 | RTKN2     | 4.60E-05 | - | 62198027 | 62198128 | 0 | 1 | 101,                      | 0      | -4.34 | -3.25 | 3.5  | -1.06 | -2.49 |
| chr6  | 31410668 | 31411288 | MICA      | 1.20E-09 | + | 31410668 | 31411288 | 0 | 2 | 129,217,                  | 0,403  | -8.92 | -8.26 | 2    | -1.07 | -2.49 |
| chr17 | 45641403 | 45641754 | LINC0221C | 2.50E-06 | + | 45641403 | 45641754 | 0 | 1 | 351,                      | 0      | -5.61 | -5.33 | 3.14 | -1.07 | -2.49 |
| chr7  | 99261303 | 99261403 | AC004834  | 8.10E-05 | - | 99261303 | 99261403 | 0 | 1 | 100,                      | 0      | -4.09 | -3.03 | 3.2  | -1.07 | -2.49 |
| chr1  | 2.12E+08 | 2.12E+08 | SLC30A1   | 1.30E-16 | - | 2.12E+08 | 2.12E+08 | 0 | 1 | 201,                      | 0      | -15.9 | -12.8 | 1.46 | -1.06 | -2.48 |
| chr16 | 30380061 | 30380161 | 1-Sep     | 2.10E-05 | - | 30380061 | 30380161 | 0 | 1 | 100,                      | 0      | -4.67 | -4.46 | 3.59 | -1.06 | -2.48 |
| chr16 | 67149969 | 67150314 | B3GNT9    | 0.00076  | - | 67149969 | 67150314 | 0 | 1 | 345,                      | 0      | -3.12 | -2.15 | 1.8  | -1.06 | -2.48 |
| chr16 | 74441437 | 74441588 | AC009053  | 0.00039  | + | 74441437 | 74441588 | 0 | 1 | 151,                      | 0      | -3.41 | -2.41 | 5.75 | -1.06 | -2.48 |
| chr17 | 2394970  | 2396463  | MNT       | 4.00E-06 | - | 2394970  | 2396463  | 0 | 2 | 484,14,                   | 0,1479 | -5.4  | -5.14 | 5.07 | -1.06 | -2.47 |
| chr19 | 44811820 | 44812185 | BCAM      | 1.00E-04 | + | 44811820 | 44812185 | 0 | 2 | 226,23,                   | 0,342  | -3.99 | -3.82 | 3.83 | -1.05 | -2.47 |
| chr17 | 38510090 | 38510340 | ARHGAP2   | 1.90E-05 | + | 38510090 | 38510340 | 0 | 1 | 250,                      | 0      | -4.72 | -4.51 | 8.17 | -1.05 | -2.47 |
| chr13 | 20702627 | 20703668 | AL161772  | 2.10E-10 | - | 20702627 | 20703668 | 0 | 1 | 1041,                     | 0      | -9.67 | -8.86 | 8.3  | -1.05 | -2.47 |
| chr9  | 1.24E+08 | 1.24E+08 | DENND1A   | 1.70E-07 | - | 1.24E+08 | 1.24E+08 | 0 | 1 | 150,                      | 0      | -6.76 | -6.38 | 1.46 | -1.04 | -2.46 |
| chr15 | 50481551 | 50484361 | USP8      | 1.50E-08 | + | 50481551 | 50484361 | 0 | 2 | 514,87,                   | 0,2723 | -7.82 | -7.31 | 3.76 | -1.04 | -2.46 |
| chr19 | 12319224 | 12319574 | ZNF563    | 9.10E-06 | - | 12319224 | 12319574 | 0 | 1 | 350,                      | 0      | -5.04 | -3.88 | 3.25 | -1.05 | -2.46 |
| chr19 | 48735241 | 48735342 | RASIP1    | 9.80E-06 | - | 48735241 | 48735342 | 0 | 1 | 101,                      | 0      | -5.01 | -3.85 | 4.4  | -1.04 | -2.45 |
| chr21 | 44933812 | 44934163 | LINC01547 | 0.00069  | - | 44933812 | 44934163 | 0 | 1 | 351,                      | 0      | -3.16 | -2.18 | 3.67 | -1.04 | -2.45 |
| chr22 | 28001681 | 28001832 | TTC28-AS  | 0.0022   | + | 28001681 | 28001832 | 0 | 1 | 151,                      | 0      | -2.66 | -1.72 | 4.5  | -1.04 | -2.45 |
| chr1  | 26170600 | 26170897 | AL391650  | 1.60E-08 | - | 26170600 | 26170897 | 0 | 1 | 297,                      | 0      | -7.79 | -7.29 | 2.89 | -1.04 | -2.45 |
| chr20 | 63708552 | 63709001 | ZGPAT     | 1.50E-10 | + | 63708552 | 63709001 | 0 | 1 | 449,                      | 0      | -9.82 | -8.99 | 3.8  | -1.03 | -2.44 |
| chr8  | 1.44E+08 | 1.44E+08 | PLEC      | 1.90E-07 | - | 1.44E+08 | 1.44E+08 | 0 | 1 | 201,                      | 0      | -6.71 | -6.34 | 2.57 | -1.03 | -2.43 |
| chr9  | 1.37E+08 | 1.37E+08 | TUBB4B    | 6.30E-14 | + | 1.37E+08 | 1.37E+08 | 0 | 1 | 299,                      | 0      | -13.2 | -11.6 | 1.47 | -1.03 | -2.43 |
| chr11 | 58579220 | 58579419 | ZFP91-CN  | 1.80E-10 | + | 58579220 | 58579419 | 0 | 1 | 199,                      | 0      | -9.75 | -8.93 | 2.03 | -1.03 | -2.43 |
| chr15 | 30626290 | 30626590 | ARHGAP1   | 1.30E-12 | + | 30626290 | 30626590 | 0 | 1 | 300,                      | 0      | -11.9 | -10.6 | 3.32 | -1.02 | -2.43 |
| chr13 | 1.11E+08 | 1.11E+08 | ANKRD10   | 1.50E-09 | - | 1.11E+08 | 1.11E+08 | 0 | 1 | 397,                      | 0      | -8.81 | -8.16 | 5.46 | -1.02 | -2.42 |
| chr18 | 80044266 | 80046354 | RBFA      | 6.30E-11 | + | 80044266 | 80046354 | 0 | 2 | 19,581,                   | 0,1507 | -10.2 | -9.3  | 3.83 | -1.02 | -2.42 |
| chr2  | 2.41E+08 | 2.41E+08 | HDLBP     | 6.60E-06 | - | 2.41E+08 | 2.41E+08 | 0 | 1 | 151,                      | 0      | -5.18 | -4.93 | 3.67 | -1.02 | -2.42 |
| chr2  | 1.31E+08 | 1.31E+08 | ARHGEF4   | 0.00081  | + | 1.31E+08 | 1.31E+08 | 0 | 1 | 399,                      | 0      | -3.09 | -2.95 | 12.2 | -1.01 | -2.41 |



|       |          |          |          |          |   |          |          |   |   |                           |               |       |       |      |        |       |
|-------|----------|----------|----------|----------|---|----------|----------|---|---|---------------------------|---------------|-------|-------|------|--------|-------|
| chrX  | 9895534  | 9895884  | SHROOM2  | 7.10E-05 | + | 9895534  | 9895884  | 0 | 1 | 350,                      | 0             | -4.15 | -3.08 | 2.18 | -1.02  | -2.41 |
| chr16 | 28879073 | 28879499 | ATP2A1   | 6.90E-06 | + | 28879073 | 28879499 | 0 | 2 | 43,257,                   | 0,169         | -5.16 | -4.92 | 2.8  | -1.01  | -2.41 |
| chr14 | 49620844 | 49621093 | MGAT2    | 1.40E-10 | + | 49620844 | 49621093 | 0 | 1 | 249,                      | 0             | -9.84 | -9    | 2.6  | -1.01  | -2.4  |
| chr6  | 33211363 | 33211462 | RING1    | 2.10E-05 | + | 33211363 | 33211462 | 0 | 1 | 99,                       | 0             | -4.67 | -4.46 | 1.58 | -1.01  | -2.4  |
| chr16 | 29819593 | 29830488 | AC120114 | 4.50E-07 | + | 29819593 | 29830488 | 0 | 2 | 309,15,                   | 0,10880       | -6.35 | -6.01 | 2.38 | -1.01  | -2.4  |
| chr2  | 2.06E+08 | 2.06E+08 | INO80D   | 2.80E-10 | - | 2.06E+08 | 2.06E+08 | 0 | 1 | 300,                      | 0             | -9.56 | -8.77 | 6.5  | -1     | -2.39 |
| chr19 | 40567751 | 40567852 | SPTBN4   | 0.0011   | - | 40567751 | 40567852 | 0 | 1 | 101,                      | 0             | -2.95 | -1.98 | 3.75 | -0.999 | -2.39 |
| chr3  | 56593967 | 56615204 | CCDC66   | 5.00E-08 | + | 56593967 | 56615204 | 0 | 3 | 61,162,77,                | 0,19621,21161 | -7.3  | -6.86 | 2.33 | -0.997 | -2.39 |
| chr2  | 1.78E+08 | 1.78E+08 | PDE11A   | 0.00014  | - | 1.78E+08 | 1.78E+08 | 0 | 1 | 201,                      | 0             | -3.84 | -2.8  | 7.5  | -0.998 | -2.39 |
| chr6  | 44250083 | 44250469 | HSP90AB1 | 5.90E-06 | + | 44250083 | 44250469 | 0 | 2 | 71,179,                   | 0,207         | -5.23 | -4.98 | 1.2  | -0.996 | -2.38 |
| chr1  | 2.28E+08 | 2.28E+08 | ZNF678   | 3.40E-06 | + | 2.28E+08 | 2.28E+08 | 0 | 1 | 150,                      | 0             | -5.47 | -4.26 | 4    | -0.991 | -2.38 |
| chr19 | 47679963 | 47680759 | BICRA    | 3.40E-05 | + | 47679963 | 47680759 | 0 | 1 | 796,                      | 0             | -4.47 | -4.27 | 9.25 | -0.989 | -2.37 |
| chr12 | 94149075 | 94149176 | PLXNC1   | 1.70E-07 | + | 94149075 | 94149176 | 0 | 1 | 101,                      | 0             | -6.76 | -5.39 | 3.25 | -0.987 | -2.37 |
| chr19 | 12973613 | 12973764 | DAND5    | 4.30E-05 | + | 12973613 | 12973764 | 0 | 1 | 151,                      | 0             | -4.37 | -4.18 | 6.75 | -0.989 | -2.37 |
| chr5  | 1.41E+08 | 1.41E+08 | PCDHGB6  | 2.80E-06 | + | 1.41E+08 | 1.41E+08 | 0 | 1 | 251,                      | 0             | -5.56 | -4.34 | 2.5  | -0.988 | -2.37 |
| chr6  | 1.57E+08 | 1.57E+08 | ARID1B   | 2.50E-11 | + | 1.57E+08 | 1.57E+08 | 0 | 1 | 600,                      | 0             | -10.6 | -9.58 | 7.43 | -0.98  | -2.36 |
| chr1  | 35749798 | 35753825 | CLSPN    | 6.30E-13 | - | 35749798 | 35753825 | 0 | 3 | 13,257,81,                | 0,1451,3946   | -12.2 | -10.8 | 3.15 | -0.982 | -2.36 |
| chrX  | 49198346 | 49198645 | SYP      | 2.30E-05 | - | 49198346 | 49198645 | 0 | 1 | 299,                      | 0             | -4.64 | -3.53 | 4.75 | -0.979 | -2.36 |
| chr1  | 43936796 | 43936945 | ARTN     | 0.0052   | + | 43936796 | 43936945 | 0 | 1 | 149,                      | 0             | -2.28 | -1.37 | 8.75 | -0.981 | -2.36 |
| chr2  | 74441922 | 74442372 | RTKN     | 9.80E-07 | - | 74441922 | 74442372 | 0 | 1 | 450,                      | 0             | -6.01 | -5.7  | 4.8  | -0.977 | -2.35 |
| chr1  | 1.09E+08 | 1.09E+08 | PRPF38B  | 2.50E-14 | + | 1.09E+08 | 1.09E+08 | 0 | 2 | 9,886,                    | 0,343         | -13.6 | -12   | 3.4  | -0.977 | -2.35 |
| chr2  | 74101292 | 74102091 | TET3     | 1.30E-11 | + | 74101292 | 74102091 | 0 | 1 | 799,                      | 0             | -10.9 | -9.82 | 6.89 | -0.977 | -2.35 |
| chr7  | 1.4E+08  | 1.4E+08  | KDM7A-D  | 6.00E-07 | + | 1.4E+08  | 1.4E+08  | 0 | 1 | 443,                      | 0             | -6.22 | -5.89 | 9    | -0.972 | -2.35 |
| chr19 | 48451174 | 48453346 | GRWD1    | 6.30E-11 | + | 48451174 | 48453346 | 0 | 2 | 57,639,                   | 0,1533        | -10.2 | -9.29 | 7.11 | -0.971 | -2.34 |
| chr1  | 1.85E+08 | 1.85E+08 | IVNS1ABP | 1.10E-07 | - | 1.85E+08 | 1.85E+08 | 0 | 1 | 200,                      | 0             | -6.95 | -6.55 | 3.2  | -0.972 | -2.34 |
| chr9  | 1.29E+08 | 1.29E+08 | ENDOG    | 0.0034   | + | 1.29E+08 | 1.29E+08 | 0 | 1 | 100,                      | 0             | -2.47 | -2.34 | 1.89 | -0.97  | -2.34 |
| chr5  | 480193   | 480736   | SLC9A3-A | 1.00E-06 | + | 480193   | 480736   | 0 | 1 | 543,                      | 0             | -5.99 | -5.68 | 9    | -0.97  | -2.34 |
| chr4  | 1.83E+08 | 1.83E+08 | WWC2-AS  | 1.00E-04 | - | 1.83E+08 | 1.83E+08 | 0 | 1 | 646,                      | 0             | -4    | -3.83 | 4.83 | -0.972 | -2.34 |
| chr19 | 34733493 | 34733690 | AC020910 | 3.90E-06 | - | 34733493 | 34733690 | 0 | 1 | 197,                      | 0             | -5.41 | -4.21 | 7.2  | -0.971 | -2.34 |
| chr1  | 2.15E+08 | 2.15E+08 | CENPF    | 4.00E-19 | + | 2.15E+08 | 2.15E+08 | 0 | 1 | 100,                      | 0             | -18.4 | -16.2 | 1.41 | -0.965 | -2.33 |
| chr19 | 45884998 | 45886091 | IRF2BP1  | 1.40E-09 | - | 45884998 | 45886091 | 0 | 1 | 1093,                     | 0             | -8.85 | -8.19 | 7.23 | -0.964 | -2.33 |
| chr3  | 1.29E+08 | 1.29E+08 | HMCES    | 8.50E-06 | + | 1.29E+08 | 1.29E+08 | 0 | 1 | 150,                      | 0             | -5.07 | -4.83 | 2.85 | -0.963 | -2.33 |
| chr15 | 50370453 | 50370654 | GABPB1-A | 1.80E-06 | + | 50370453 | 50370654 | 0 | 1 | 201,                      | 0             | -5.75 | -5.46 | 7.17 | -0.965 | -2.33 |
| chr14 | 57275351 | 57278454 | AP5M1    | 3.20E-11 | + | 57275351 | 57278454 | 0 | 2 | 118,33,                   | 0,3070        | -10.5 | -9.5  | 2.19 | -0.959 | -2.32 |
| chr2  | 2.27E+08 | 2.27E+08 | IRS1     | 5.10E-07 | - | 2.27E+08 | 2.27E+08 | 0 | 1 | 101,                      | 0             | -6.29 | -4.98 | 5.2  | -0.96  | -2.32 |
| chr5  | 1.4E+08  | 1.4E+08  | PURA     | 0.00022  | + | 1.4E+08  | 1.4E+08  | 0 | 1 | 349,                      | 0             | -3.66 | -3.5  | 2.93 | -0.96  | -2.32 |
| chr1  | 99969536 | 99969771 | AC118553 | 2.00E-05 | - | 99969536 | 99969771 | 0 | 1 | 235,                      | 0             | -4.69 | -4.48 | 4.6  | -0.962 | -2.32 |
| chrX  | 53142805 | 53143105 | KANTR    | 4.30E-06 | + | 53142805 | 53143105 | 0 | 1 | 300,                      | 0             | -5.37 | -5.11 | 4.36 | -0.962 | -2.32 |
| chr10 | 1.32E+08 | 1.32E+08 | AL162274 | 1.00E-08 | + | 1.32E+08 | 1.32E+08 | 0 | 1 | 100,                      | 0             | -7.98 | -6.44 | 8    | -0.96  | -2.32 |
| chr20 | 64099243 | 64099393 | AL121581 | 1.20E-07 | - | 64099243 | 64099393 | 0 | 1 | 150,                      | 0             | -6.93 | -5.54 | 5.75 | -0.96  | -2.32 |
| chr5  | 1.41E+08 | 1.41E+08 | ZMAT2    | 2.60E-08 | + | 1.41E+08 | 1.41E+08 | 0 | 4 | 74,87,146,130,1862,2370,3 |               | -7.59 | -7.11 | 1.83 | -0.953 | -2.31 |
| chr19 | 16067596 | 16067797 | TPM4     | 1.30E-05 | + | 16067596 | 16067797 | 0 | 1 | 201,                      | 0             | -4.87 | -4.64 | 1.4  | -0.951 | -2.31 |
| chr22 | 17540419 | 17540569 | CECR2    | 0.0065   | + | 17540419 | 17540569 | 0 | 1 | 150,                      | 0             | -2.19 | -2.08 | 2.24 | -0.948 | -2.3  |
| chr7  | 1.15E+08 | 1.15E+08 | FOXP2    | 5.20E-07 | + | 1.15E+08 | 1.15E+08 | 0 | 1 | 201,                      | 0             | -6.28 | -5.94 | 5.67 | -0.951 | -2.3  |
| chr14 | 1.03E+08 | 1.03E+08 | CDC42BPE | 5.40E-05 | - | 1.03E+08 | 1.03E+08 | 0 | 1 | 201,                      | 0             | -4.27 | -4.08 | 1.81 | -0.946 | -2.3  |
| chr4  | 7043433  | 7043634  | TADA2B   | 1.20E-06 | + | 7043433  | 7043634  | 0 | 1 | 201,                      | 0             | -5.92 | -5.62 | 1.74 | -0.937 | -2.29 |
| chr21 | 10473216 | 10473466 | BAGE2    | 4.80E-08 | + | 10473216 | 10473466 | 0 | 1 | 250,                      | 0             | -7.32 | -6.88 | 10.4 | -0.942 | -2.29 |
| chr12 | 94571395 | 94571595 | TMCC3    | 0.00013  | - | 94571395 | 94571595 | 0 | 1 | 200,                      | 0             | -3.87 | -2.83 | 3.5  | -0.933 | -2.28 |
| chr5  | 1.6E+08  | 1.6E+08  | TTC1     | 1.60E-09 | + | 1.6E+08  | 1.6E+08  | 0 | 3 | 31,359,58,                | 0,1337,25977  | -8.79 | -8.14 | 1.71 | -0.93  | -2.28 |
| chr2  | 2.36E+08 | 2.36E+08 | AGAP1    | 9.30E-07 | + | 2.36E+08 | 2.36E+08 | 0 | 1 | 151,                      | 0             | -6.03 | -5.72 | 3    | -0.934 | -2.28 |
| chr17 | 59112143 | 59119346 | SKA2     | 1.00E-10 | - | 59112143 | 59119346 | 0 | 2 | 202,48,                   | 0,7155        | -10   | -9.14 | 2.18 | -0.927 | -2.27 |

|       |          |          |           |          |   |          |          |   |   |                           |             |   |       |       |      |        |       |
|-------|----------|----------|-----------|----------|---|----------|----------|---|---|---------------------------|-------------|---|-------|-------|------|--------|-------|
| chr17 | 7582308  | 7583391  | AC016876  | 6.00E-06 | - | 7582308  | 7583391  | 0 | 2 | 223,516,                  | 0,567       |   | -5.22 | -4.97 | 10.2 | -0.928 | -2.27 |
| chr18 | 74596974 | 74597372 | LINC00909 | 3.00E-06 | - | 74596974 | 74597372 | 0 | 1 | 398,                      |             | 0 | -5.52 | -5.25 | 6.25 | -0.924 | -2.27 |
| chr3  | 1.88E+08 | 1.88E+08 | AC022498  | 1.90E-10 | + | 1.88E+08 | 1.88E+08 | 0 | 1 | 199,                      |             | 0 | -9.72 | -8.9  | 2.7  | -0.928 | -2.27 |
| chr19 | 38337387 | 38337626 | CATSPERG  | 0.00011  | + | 38337387 | 38337626 | 0 | 2 | 117,34,                   | 0,205       |   | -3.95 | -3.78 | 3.06 | -0.922 | -2.26 |
| chr5  | 1.81E+08 | 1.81E+08 | TRIM41    | 4.60E-10 | + | 1.81E+08 | 1.81E+08 | 0 | 1 | 898,                      |             | 0 | -9.34 | -8.6  | 5.13 | -0.922 | -2.26 |
| chr1  | 2.26E+08 | 2.26E+08 | ENAH      | 4.10E-09 | - | 2.26E+08 | 2.26E+08 | 0 | 4 | 304,85,12,490,11292,1178. |             |   | -8.39 | -7.81 | 2.43 | -0.922 | -2.26 |
| chr14 | 1.05E+08 | 1.05E+08 | TEDC1     | 1.30E-13 | + | 1.05E+08 | 1.05E+08 | 0 | 1 | 601,                      |             | 0 | -12.9 | -11.4 | 5.95 | -0.918 | -2.26 |
| chrX  | 72143429 | 72143729 | NHSL2     | 4.90E-05 | + | 72143429 | 72143729 | 0 | 1 | 300,                      |             | 0 | -4.31 | -4.12 | 8.25 | -0.92  | -2.26 |
| chr19 | 7682514  | 7682611  | AC008763  | 1.00E-11 | + | 7682514  | 7682611  | 0 | 1 | 97,                       |             | 0 | -11   | -9.94 | 1.61 | -0.922 | -2.26 |
| chr22 | 50604331 | 50604932 | MAPK8IP2  | 1.90E-07 | + | 50604331 | 50604932 | 0 | 1 | 601,                      |             | 0 | -6.73 | -6.35 | 7    | -0.911 | -2.25 |
| chr19 | 7682522  | 7682623  | TRAPPC5   | 1.40E-10 | + | 7682522  | 7682623  | 0 | 1 | 101,                      |             | 0 | -9.84 | -9.01 | 1.8  | -0.914 | -2.25 |
| chr17 | 82362336 | 82362535 | TEX19     | 0.0091   | + | 82362336 | 82362535 | 0 | 1 | 199,                      |             | 0 | -2.04 | -1.93 | 14.4 | -0.911 | -2.25 |
| chr8  | 80499950 | 80500300 | ZBTB10    | 7.90E-13 | + | 80499950 | 80500300 | 0 | 1 | 350,                      |             | 0 | -12.1 | -10.7 | 4.77 | -0.911 | -2.25 |
| chr9  | 1.21E+08 | 1.21E+08 | CUTALP    | 1.90E-10 | + | 1.21E+08 | 1.21E+08 | 0 | 1 | 1246,                     |             | 0 | -9.72 | -8.9  | 9.82 | -0.913 | -2.25 |
| chr15 | 52046470 | 52046819 | MAPK6     | 6.30E-12 | + | 52046470 | 52046819 | 0 | 1 | 349,                      |             | 0 | -11.2 | -10.1 | 7.35 | -0.908 | -2.24 |
| chr14 | 73109414 | 73111002 | RBM25     | 5.50E-10 | + | 73109414 | 73111002 | 0 | 2 | 78,172,                   | 0,1416      |   | -9.26 | -8.54 | 1.65 | -0.909 | -2.24 |
| chr9  | 71745185 | 71746255 | CEMIP2    | 0.00023  | - | 71745185 | 71746255 | 0 | 2 | 394,55,                   | 0,1015      |   | -3.64 | -3.48 | 6.6  | -0.909 | -2.24 |
| chr16 | 47083088 | 47083787 | NETO2     | 1.30E-11 | - | 47083088 | 47083787 | 0 | 1 | 699,                      |             | 0 | -10.9 | -9.82 | 8.07 | -0.909 | -2.24 |
| chr19 | 45499540 | 45499640 | PPM1N     | 0.0037   | + | 45499540 | 45499640 | 0 | 1 | 100,                      |             | 0 | -2.43 | -1.51 | 2.3  | -0.909 | -2.24 |
| chr5  | 480184   | 480731   | SLC9A3-A' | 0.00049  | + | 480184   | 480731   | 0 | 1 | 547,                      |             | 0 | -3.31 | -3.16 | 9.25 | -0.909 | -2.24 |
| chr19 | 3613684  | 3613930  | CACTIN-A  | 2.90E-05 | + | 3613684  | 3613930  | 0 | 1 | 246,                      |             | 0 | -4.54 | -4.34 | 5.56 | -0.909 | -2.24 |
| chr9  | 33524443 | 33528677 | ANKRD18E  | 5.00E-11 | + | 33524443 | 33528677 | 0 | 2 | 252,46,                   | 0,4188      |   | -10.3 | -9.33 | 6.18 | -0.909 | -2.24 |
| chr9  | 1.01E+08 | 1.01E+08 | ZNF189    | 4.10E-08 | + | 1.01E+08 | 1.01E+08 | 0 | 1 | 1941,                     |             | 0 | -7.39 | -6.94 | 7.71 | -0.901 | -2.23 |
| chr19 | 58572710 | 58573402 | MZF1-AS1  | 2.80E-06 | + | 58572710 | 58573402 | 0 | 2 | 113,486,                  | 0,206       |   | -5.55 | -5.28 | 2.9  | -0.902 | -2.23 |
| chr2  | 74833690 | 74833987 | ACO19069  | 2.20E-09 | - | 74833690 | 74833987 | 0 | 1 | 297,                      |             | 0 | -8.66 | -8.04 | 8.17 | -0.899 | -2.23 |
| chr5  | 34915673 | 34915872 | BRX1      | 5.40E-08 | + | 34915673 | 34915872 | 0 | 1 | 199,                      |             | 0 | -7.27 | -6.83 | 4.38 | -0.893 | -2.22 |
| chr5  | 1.08E+08 | 1.08E+08 | FBXL17    | 4.60E-09 | - | 1.08E+08 | 1.08E+08 | 0 | 1 | 151,                      |             | 0 | -8.34 | -7.76 | 3    | -0.897 | -2.22 |
| chr10 | 1.03E+08 | 1.03E+08 | CNNM2     | 3.00E-09 | + | 1.03E+08 | 1.03E+08 | 0 | 1 | 401,                      |             | 0 | -8.52 | -7.92 | 8.71 | -0.886 | -2.21 |
| chr10 | 79684639 | 79685287 | BEND3P3   | 2.70E-07 | + | 79684639 | 79685287 | 0 | 1 | 648,                      |             | 0 | -6.57 | -6.21 | 8.17 | -0.887 | -2.21 |
| chr19 | 18149550 | 18149850 | MAST3     | 1.90E-05 | + | 18149550 | 18149850 | 0 | 1 | 300,                      |             | 0 | -4.73 | -4.52 | 2.71 | -0.88  | -2.2  |
| chr15 | 90961037 | 90961386 | RCCD1     | 4.70E-10 | + | 90961037 | 90961386 | 0 | 1 | 349,                      |             | 0 | -9.33 | -8.59 | 13   | -0.885 | -2.2  |
| chr19 | 12132415 | 12132865 | ZNF625-Z  | 9.50E-06 | - | 12132415 | 12132865 | 0 | 1 | 450,                      |             | 0 | -5.02 | -4.79 | 6.42 | -0.88  | -2.2  |
| chr19 | 54982288 | 54982935 | NLRP2     | 1.00E-10 | + | 54982288 | 54982935 | 0 | 1 | 647,                      |             | 0 | -9.98 | -9.12 | 5.88 | -0.878 | -2.19 |
| chr15 | 74599149 | 74599450 | CLK3      | 0.00071  | + | 74599149 | 74599450 | 0 | 1 | 301,                      |             | 0 | -3.15 | -2.17 | 2.75 | -0.873 | -2.19 |
| chr10 | 73243467 | 73245932 | DNAJC9    | 2.80E-07 | - | 73243467 | 73245932 | 0 | 3 | 52,87,11,                 | 0,375,2454  |   | -6.55 | -6.19 | 2.82 | -0.878 | -2.19 |
| chr20 | 64099491 | 64099691 | AL121581  | 1.20E-07 | - | 64099491 | 64099691 | 0 | 1 | 200,                      |             | 0 | -6.93 | -5.54 | 2.5  | -0.874 | -2.19 |
| chr1  | 11023185 | 11023883 | TARDBP    | 2.40E-09 | + | 11023185 | 11023883 | 0 | 1 | 698,                      |             | 0 | -8.62 | -8    | 3.37 | -0.873 | -2.18 |
| chr2  | 1.28E+08 | 1.28E+08 | WDR33     | 2.40E-10 | - | 1.28E+08 | 1.28E+08 | 0 | 2 | 285,165,                  | 0,2409      |   | -9.62 | -8.83 | 9.56 | -0.866 | -2.18 |
| chr9  | 1.04E+08 | 1.04E+08 | SMC2      | 1.70E-07 | + | 1.04E+08 | 1.04E+08 | 0 | 3 | 99,194,6,                 | 0,1778,3507 |   | -6.78 | -6.39 | 1.74 | -0.866 | -2.18 |
| chr10 | 17321040 | 17321190 | S78SIA6   | 0.003    | - | 17321040 | 17321190 | 0 | 1 | 150,                      |             | 0 | -2.53 | -1.6  | 3.6  | -0.866 | -2.18 |
| chr13 | 98448479 | 98448580 | FARP1     | 4.60E-05 | + | 98448479 | 98448580 | 0 | 1 | 101,                      |             | 0 | -4.34 | -3.26 | 1.71 | -0.87  | -2.18 |
| chr5  | 479638   | 479838   | SLC9A3-A' | 0.00049  | + | 479638   | 479838   | 0 | 1 | 200,                      |             | 0 | -3.31 | -2.31 | 2.5  | -0.866 | -2.18 |
| chr15 | 30626135 | 30626634 | ACO91057  | 3.20E-10 | + | 30626135 | 30626634 | 0 | 1 | 499,                      |             | 0 | -9.49 | -8.72 | 3.17 | -0.873 | -2.18 |
| chr19 | 12132422 | 12132972 | ZNF20     | 3.20E-08 | - | 12132422 | 12132972 | 0 | 1 | 550,                      |             | 0 | -7.5  | -7.03 | 6.58 | -0.859 | -2.17 |
| chr1  | 1.56E+08 | 1.56E+08 | PAQR6     | 0.00091  | - | 1.56E+08 | 1.56E+08 | 0 | 1 | 100,                      |             | 0 | -3.04 | -2.07 | 1.5  | -0.862 | -2.17 |
| chr8  | 94930614 | 94939908 | TP53INP1  | 9.30E-06 | - | 94930614 | 94939908 | 0 | 3 | 114,38,49,                | 0,1455,9245 |   | -5.03 | -3.88 | 3.38 | -0.862 | -2.17 |
| chrX  | 76176956 | 76178012 | PBDC1     | 1.60E-09 | + | 76176956 | 76178012 | 0 | 2 | 36,397,                   | 0,659       |   | -8.8  | -8.16 | 5.75 | -0.855 | -2.16 |
| chr19 | 18667726 | 18667877 | KLHL26    | 0.00036  | + | 18667726 | 18667877 | 0 | 1 | 151,                      |             | 0 | -3.44 | -3.29 | 3.08 | -0.855 | -2.16 |
| chr2  | 1.66E+08 | 1.66E+08 | CSRNP3    | 4.00E-08 | + | 1.66E+08 | 1.66E+08 | 0 | 1 | 251,                      |             | 0 | -7.4  | -6.95 | 9    | -0.855 | -2.16 |
| chr20 | 44224977 | 44225128 | OSER1-DT  | 0.0025   | + | 44224977 | 44225128 | 0 | 1 | 151,                      |             | 0 | -2.6  | -1.66 | 3.25 | -0.854 | -2.16 |
| chr22 | 41254410 | 41256087 | RANGAP1   | 7.90E-11 | - | 41254410 | 41256087 | 0 | 2 | 84,67,                    | 0,1610      |   | -10.1 | -9.21 | 1.65 | -0.852 | -2.15 |

|       |          |          |           |          |   |          |          |   |   |                           |              |       |       |      |        |       |
|-------|----------|----------|-----------|----------|---|----------|----------|---|---|---------------------------|--------------|-------|-------|------|--------|-------|
| chr1  | 11719636 | 11719737 | DRAXIN    | 1.20E-06 | + | 11719636 | 11719737 | 0 | 1 | 101,                      | 0            | -5.92 | -4.66 | 6.25 | -0.851 | -2.15 |
| chr8  | 1.42E+08 | 1.42E+08 | TSNARE1   | 6.60E-05 | - | 1.42E+08 | 1.42E+08 | 0 | 1 | 300,                      | 0            | -4.18 | -3.11 | 6    | -0.84  | -2.14 |
| chr11 | 70435433 | 70435684 | CTTN      | 4.20E-06 | + | 70435433 | 70435684 | 0 | 1 | 251,                      | 0            | -5.38 | -5.12 | 2.19 | -0.836 | -2.13 |
| chr17 | 49575906 | 49576203 | NXPH3     | 2.00E-07 | + | 49575906 | 49576203 | 0 | 1 | 297,                      | 0            | -6.69 | -6.31 | 12.3 | -0.834 | -2.13 |
| chr5  | 1.41E+08 | 1.41E+08 | PCDHGB7   | 0.00091  | + | 1.41E+08 | 1.41E+08 | 0 | 1 | 250,                      | 0            | -3.04 | -2.07 | 7    | -0.835 | -2.13 |
| chr7  | 1.21E+08 | 1.21E+08 | TSPAN12   | 0.00036  | - | 1.21E+08 | 1.21E+08 | 0 | 1 | 149,                      | 0            | -3.44 | -3.29 | 2.67 | -0.831 | -2.12 |
| chr16 | 88570430 | 88586647 | ZC3H18    | 2.00E-13 | + | 88570430 | 88586647 | 0 | 3 | 136,617,48,               | 0,6679,16169 | -12.7 | -11.2 | 5    | -0.83  | -2.12 |
| chr19 | 49107857 | 49108456 | SNRNP70   | 1.00E-10 | + | 49107857 | 49108456 | 0 | 1 | 599,                      | 0            | -10   | -9.15 | 1.43 | -0.828 | -2.11 |
| chr19 | 42378469 | 42378669 | MEGF8     | 5.10E-06 | + | 42378469 | 42378669 | 0 | 1 | 200,                      | 0            | -5.29 | -5.04 | 3.17 | -0.823 | -2.11 |
| chr10 | 1.01E+08 | 1.01E+08 | TWNK      | 4.80E-08 | + | 1.01E+08 | 1.01E+08 | 0 | 1 | 499,                      | 0            | -7.32 | -6.87 | 5.58 | -0.828 | -2.11 |
| chr11 | 65581533 | 65581982 | EHPB1L1   | 1.20E-07 | + | 65581533 | 65581982 | 0 | 1 | 449,                      | 0            | -6.91 | -6.51 | 1.7  | -0.828 | -2.11 |
| chr11 | 58579162 | 58579411 | ZFP91     | 4.00E-10 | + | 58579162 | 58579411 | 0 | 1 | 249,                      | 0            | -9.4  | -8.65 | 2.46 | -0.828 | -2.11 |
| chr17 | 48613281 | 48613479 | HOXB8     | 4.00E-11 | - | 48613281 | 48613479 | 0 | 1 | 198,                      | 0            | -10.4 | -9.44 | 5.68 | -0.817 | -2.1  |
| chr6  | 93410902 | 93411152 | EPHA7     | 3.70E-05 | - | 93410902 | 93411152 | 0 | 1 | 250,                      | 0            | -4.43 | -4.23 | 6.91 | -0.818 | -2.1  |
| chr20 | 49887944 | 49888095 | SLC9A8    | 2.00E-05 | + | 49887944 | 49888095 | 0 | 1 | 151,                      | 0            | -4.69 | -3.57 | 3.5  | -0.819 | -2.1  |
| chr9  | 95446377 | 95446478 | PTCH1     | 0.00015  | - | 95446377 | 95446478 | 0 | 1 | 101,                      | 0            | -3.82 | -3.66 | 1.8  | -0.813 | -2.09 |
| chr6  | 31463834 | 31463934 | HCP5      | 5.20E-05 | + | 31463834 | 31463934 | 0 | 1 | 100,                      | 0            | -4.28 | -3.2  | 4.4  | -0.808 | -2.09 |
| chr5  | 473831   | 475170   | SLC9A3-A' | 1.90E-06 | + | 473831   | 475170   | 0 | 2 | 215,34,                   | 0,1305       | -5.72 | -5.43 | 3.57 | -0.813 | -2.09 |
| chr19 | 58440943 | 58441241 | ACO12313  | 5.20E-05 | + | 58440943 | 58441241 | 0 | 1 | 298,                      | 0            | -4.28 | -3.2  | 3.12 | -0.811 | -2.09 |
| chr15 | 72231273 | 72231473 | PKM       | 3.30E-06 | - | 72231273 | 72231473 | 0 | 1 | 200,                      | 0            | -5.48 | -4.27 | 5.25 | -0.804 | -2.08 |
| chr1  | 2.18E+08 | 2.18E+08 | RRP15     | 1.50E-10 | + | 2.18E+08 | 2.18E+08 | 0 | 1 | 151,                      | 0            | -9.82 | -8.99 | 2.96 | -0.805 | -2.08 |
| chr10 | 78035580 | 78035730 | RPS24     | 0.00038  | + | 78035580 | 78035730 | 0 | 1 | 150,                      | 0            | -3.42 | -3.27 | 1.14 | -0.802 | -2.08 |
| chr18 | 21363639 | 21363740 | GREB1L    | 0.0018   | + | 21363639 | 21363740 | 0 | 1 | 101,                      | 0            | -2.75 | -2.62 | 4.36 | -0.803 | -2.08 |
| chr17 | 81868761 | 81869059 | ARHGDI4   | 4.30E-08 | - | 81868761 | 81869059 | 0 | 1 | 298,                      | 0            | -7.37 | -6.92 | 3.71 | -0.803 | -2.08 |
| chr10 | 31319246 | 31320167 | ZEB1      | 1.50E-09 | + | 31319246 | 31320167 | 0 | 2 | 46,55,                    | 0,866        | -8.81 | -8.16 | 2.65 | -0.802 | -2.08 |
| chr19 | 48750555 | 48750706 | FUT1      | 0.00032  | - | 48750555 | 48750706 | 0 | 1 | 151,                      | 0            | -3.49 | -2.48 | 2.17 | -0.803 | -2.08 |
| chr11 | 76385843 | 76386193 | GVQW3     | 7.60E-06 | + | 76385843 | 76386193 | 0 | 1 | 350,                      | 0            | -5.12 | -3.95 | 3.75 | -0.802 | -2.08 |
| chr8  | 51946797 | 51947195 | ACO64807  | 1.50E-05 | + | 51946797 | 51947195 | 0 | 1 | 398,                      | 0            | -4.83 | -3.69 | 4.6  | -0.805 | -2.08 |
| chr1  | 52055172 | 52055572 | TXNDC12   | 0.00091  | - | 52055172 | 52055572 | 0 | 1 | 400,                      | 0            | -3.04 | -2.9  | 4    | -0.798 | -2.07 |
| chr2  | 1.35E+08 | 1.35E+08 | ZRANB3    | 0.00025  | - | 1.35E+08 | 1.35E+08 | 0 | 2 | 41,310,                   | 0,4511       | -3.6  | -3.45 | 4.33 | -0.796 | -2.07 |
| chr16 | 3301201  | 3301301  | TIGD7     | 0.00068  | - | 3301201  | 3301301  | 0 | 1 | 100,                      | 0            | -3.17 | -2.19 | 1.56 | -0.799 | -2.07 |
| chr10 | 1.28E+08 | 1.28E+08 | MKI67     | 4.70E-10 | - | 1.28E+08 | 1.28E+08 | 0 | 1 | 2050,                     | 0            | -9.33 | -8.6  | 6.45 | -0.8   | -2.07 |
| chr19 | 18155569 | 18155969 | ACO07192  | 1.80E-05 | + | 18155569 | 18155969 | 0 | 1 | 400,                      | 0            | -4.75 | -4.54 | 3.48 | -0.8   | -2.07 |
| chr5  | 34925301 | 34925500 | BRX1      | 3.80E-10 | + | 34925301 | 34925500 | 0 | 1 | 199,                      | 0            | -9.42 | -8.67 | 1.45 | -0.792 | -2.06 |
| chr11 | 62533868 | 62534019 | AHNAK     | 6.30E-05 | - | 62533868 | 62534019 | 0 | 1 | 151,                      | 0            | -4.2  | -4.01 | 5    | -0.794 | -2.06 |
| chr5  | 1.4E+08  | 1.4E+08  | ANKHD1    | 1.00E-08 | + | 1.4E+08  | 1.4E+08  | 0 | 1 | 200,                      | 0            | -8    | -7.47 | 2.55 | -0.79  | -2.06 |
| chr11 | 1.17E+08 | 1.17E+08 | SIK3      | 6.20E-06 | - | 1.17E+08 | 1.17E+08 | 0 | 1 | 201,                      | 0            | -5.21 | -4.97 | 4.92 | -0.792 | -2.06 |
| chr14 | 49618816 | 49620586 | RPL36AL   | 9.80E-09 | - | 49618816 | 49620586 | 0 | 2 | 324,25,                   | 0,1745       | -8.01 | -7.48 | 3.09 | -0.794 | -2.06 |
| chr16 | 67185437 | 67186260 | EXOC3L1   | 6.90E-05 | - | 67185437 | 67186260 | 0 | 2 | 227,24,                   | 0,799        | -4.16 | -3.09 | 5.33 | -0.79  | -2.06 |
| chr17 | 81637730 | 81637981 | TSPAN10   | 5.40E-09 | + | 81637730 | 81637981 | 0 | 1 | 251,                      | 0            | -8.27 | -7.7  | 3.44 | -0.791 | -2.06 |
| chr19 | 10334522 | 10335518 | ICAM3     | 2.80E-05 | - | 10334522 | 10335518 | 0 | 1 | 996,                      | 0            | -4.55 | -4.35 | 5.8  | -0.784 | -2.05 |
| chr2  | 2.07E+08 | 2.07E+08 | KLF7      | 0.0014   | - | 2.07E+08 | 2.07E+08 | 0 | 1 | 100,                      | 0            | -2.86 | -1.9  | 2.5  | -0.789 | -2.05 |
| chr2  | 40430044 | 40446454 | SLC8A1    | 2.20E-07 | - | 40430044 | 40446454 | 0 | 2 | 260,40,                   | 0,16370      | -6.65 | -6.28 | 3.8  | -0.784 | -2.05 |
| chr1  | 2.23E+08 | 2.23E+08 | AIDA      | 7.20E-06 | - | 2.23E+08 | 2.23E+08 | 0 | 1 | 299,                      | 0            | -5.14 | -4.9  | 3.5  | -0.788 | -2.05 |
| chr5  | 36875253 | 36875453 | NIPBL-DT  | 1.60E-07 | - | 36875253 | 36875453 | 0 | 1 | 200,                      | 0            | -6.79 | -5.42 | 2.75 | -0.786 | -2.05 |
| chr22 | 37639498 | 37639748 | SH3BP1    | 5.60E-10 | + | 37639498 | 37639748 | 0 | 1 | 250,                      | 0            | -9.25 | -8.53 | 2.56 | -0.783 | -2.04 |
| chr3  | 50584982 | 50585283 | HEMK1     | 3.50E-08 | + | 50584982 | 50585283 | 0 | 1 | 301,                      | 0            | -7.45 | -6.99 | 10.2 | -0.783 | -2.04 |
| chr2  | 25282537 | 25342490 | DNMT3A    | 3.30E-08 | - | 25282537 | 25342490 | 0 | 5 | 174,105,249,0,17601,3137! |              | -7.48 | -7.02 | 2.33 | -0.783 | -2.04 |
| chr10 | 69208700 | 69208999 | SUPV3L1   | 4.00E-13 | + | 69208700 | 69208999 | 0 | 1 | 299,                      | 0            | -12.4 | -11   | 4.87 | -0.78  | -2.04 |
| chr7  | 1.01E+08 | 1.01E+08 | ACHE      | 0.0026   | - | 1.01E+08 | 1.01E+08 | 0 | 1 | 249,                      | 0            | -2.58 | -2.45 | 5.6  | -0.776 | -2.03 |
| chr17 | 68511928 | 68512414 | PRKAR1A   | 6.30E-07 | + | 68511928 | 68512414 | 0 | 2 | 214,36,                   | 0,450        | -6.2  | -5.87 | 2.41 | -0.776 | -2.03 |

|       |          |          |           |          |   |          |          |   |   |                           |         |   |       |       |      |        |       |
|-------|----------|----------|-----------|----------|---|----------|----------|---|---|---------------------------|---------|---|-------|-------|------|--------|-------|
| chr14 | 60092410 | 60108277 | PCNX4     | 5.60E-08 | + | 60092410 | 60108277 | 0 | 2 | 9,692,                    | 0,15175 |   | -7.25 | -6.81 | 5.38 | -0.776 | -2.03 |
| chr19 | 18281180 | 18281573 | JUND      | 5.60E-05 | - | 18281180 | 18281573 | 0 | 1 | 393,                      |         | 0 | -4.25 | -4.07 | 1.48 | -0.779 | -2.03 |
| chr11 | 1.19E+08 | 1.19E+08 | NLRX1     | 0.00012  | + | 1.19E+08 | 1.19E+08 | 0 | 1 | 300,                      |         | 0 | -3.92 | -3.75 | 2.62 | -0.779 | -2.03 |
| chr10 | 68956268 | 68956496 | DDX21     | 0.0015   | + | 68956268 | 68956496 | 0 | 2 | 44,57,                    | 0,171   |   | -2.82 | -2.69 | 1.31 | -0.776 | -2.03 |
| chr3  | 1.26E+08 | 1.26E+08 | LINC02614 | 6.80E-06 | - | 1.26E+08 | 1.26E+08 | 0 | 1 | 300,                      |         | 0 | -5.17 | -3.99 | 5.2  | -0.779 | -2.03 |
| chr1  | 2.45E+08 | 2.45E+08 | HNRNPU    | 1.00E-12 | - | 2.45E+08 | 2.45E+08 | 0 | 1 | 600,                      |         | 0 | -12   | -10.7 | 1.4  | -0.77  | -2.02 |
| chr10 | 42830316 | 42831307 | BMS1      | 1.30E-13 | + | 42830316 | 42831307 | 0 | 2 | 106,442,                  | 0,549   |   | -12.9 | -11.4 | 5.31 | -0.772 | -2.02 |
| chr15 | 55620081 | 55620677 | PRTG      | 1.60E-05 | - | 55620081 | 55620677 | 0 | 2 | 185,15,                   | 0,581   |   | -4.79 | -4.58 | 5.5  | -0.769 | -2.02 |
| chr21 | 46244457 | 46244757 | MCM3AP-   | 1.30E-07 | + | 46244457 | 46244757 | 0 | 1 | 300,                      |         | 0 | -6.87 | -5.49 | 4.5  | -0.77  | -2.02 |
| chr1  | 1.5E+08  | 1.5E+08  | AC244033  | 0.00044  | - | 1.5E+08  | 1.5E+08  | 0 | 1 | 300,                      |         | 0 | -3.36 | -3.21 | 3.78 | -0.773 | -2.02 |
| chr9  | 1.14E+08 | 1.14E+08 | AKNA      | 1.70E-07 | - | 1.14E+08 | 1.14E+08 | 0 | 2 | 277,22,                   | 0,6690  |   | -6.76 | -6.37 | 2.83 | -0.766 | -2.01 |
| chr1  | 85707737 | 85708334 | ZNHIT6    | 3.20E-14 | - | 85707737 | 85708334 | 0 | 1 | 597,                      |         | 0 | -13.5 | -11.9 | 3.64 | -0.766 | -2.01 |
| chr21 | 37367257 | 37367608 | DYRK1A    | 1.20E-08 | + | 37367257 | 37367608 | 0 | 1 | 351,                      |         | 0 | -7.91 | -7.39 | 2.16 | -0.766 | -2.01 |
| chr19 | 36237275 | 36238275 | ZNF146    | 1.90E-08 | + | 36237275 | 36238275 | 0 | 1 | 1000,                     |         | 0 | -7.72 | -7.23 | 5.86 | -0.766 | -2.01 |
| chr8  | 1.45E+08 | 1.45E+08 | ZNF517    | 4.60E-05 | + | 1.45E+08 | 1.45E+08 | 0 | 1 | 200,                      |         | 0 | -4.34 | -3.26 | 2    | -0.768 | -2.01 |
| chr19 | 46649140 | 46649240 | DACT3     | 1.50E-06 | - | 46649140 | 46649240 | 0 | 1 | 100,                      |         | 0 | -5.83 | -5.53 | 2.47 | -0.766 | -2.01 |
| chr7  | 1.07E+08 | 1.07E+08 | HBP1      | 1.20E-05 | + | 1.07E+08 | 1.07E+08 | 0 | 1 | 151,                      |         | 0 | -4.91 | -4.69 | 2.71 | -0.762 | -2    |
| chr1  | 2.28E+08 | 2.28E+08 | SNAP47    | 0.00013  | + | 2.28E+08 | 2.28E+08 | 0 | 1 | 150,                      |         | 0 | -3.9  | -3.73 | 2.36 | -0.764 | -2    |
| chr1  | 43450353 | 43451153 | SZT2      | 2.30E-08 | + | 43450353 | 43451153 | 0 | 1 | 800,                      |         | 0 | -7.64 | -7.16 | 8.5  | -0.763 | -2    |
| chr19 | 45499342 | 45499442 | PPM1N     | 0.0037   | + | 45499342 | 45499442 | 0 | 1 | 100,                      |         | 0 | -2.43 | -1.51 | 2    | -0.763 | -2    |
| chr21 | 33309241 | 33309342 | IL10RB    | 1.70E-08 | + | 33309241 | 33309342 | 0 | 1 | 101,                      |         | 0 | -7.76 | -6.25 | 2.5  | -0.758 | -2    |
| chrX  | 48902297 | 48902447 | PQBP1     | 5.80E-08 | + | 48902297 | 48902447 | 0 | 1 | 150,                      |         | 0 | -7.24 | -6.8  | 1.35 | -0.754 | -1.99 |
| chr12 | 55743378 | 55743479 | GDF11     | 1.70E-08 | + | 55743378 | 55743479 | 0 | 1 | 101,                      |         | 0 | -7.76 | -7.26 | 2.1  | -0.754 | -1.99 |
| chr5  | 52799931 | 52800131 | PELO      | 3.20E-12 | + | 52799931 | 52800131 | 0 | 1 | 200,                      |         | 0 | -11.5 | -10.3 | 2.29 | -0.754 | -1.99 |
| chr4  | 80202533 | 80202734 | PRDM8     | 5.00E-08 | + | 80202533 | 80202734 | 0 | 1 | 201,                      |         | 0 | -7.3  | -5.85 | 3.86 | -0.756 | -1.99 |
| chr2  | 1.3E+08  | 1.3E+08  | MED15P9   | 1.60E-05 | + | 1.3E+08  | 1.3E+08  | 0 | 1 | 148,                      |         | 0 | -4.79 | -4.58 | 3.25 | -0.754 | -1.99 |
| chr2  | 2.37E+08 | 2.37E+08 | AC012063  | 4.90E-06 | - | 2.37E+08 | 2.37E+08 | 0 | 1 | 201,                      |         | 0 | -5.31 | -4.12 | 3.4  | -0.756 | -1.99 |
| chr2  | 27774488 | 27779539 | MRPL33    | 5.10E-10 | + | 27774488 | 27779539 | 0 | 2 | 42,107,                   | 0,4944  |   | -9.29 | -8.56 | 1.51 | -0.755 | -1.99 |
| chr10 | 96522205 | 96522306 | TM9SF3    | 2.90E-05 | - | 96522205 | 96522306 | 0 | 1 | 101,                      |         | 0 | -4.54 | -4.34 | 1.69 | -0.749 | -1.98 |
| chr20 | 18142636 | 18142829 | KAT14     | 1.60E-07 | + | 18142636 | 18142829 | 0 | 1 | 193,                      |         | 0 | -6.79 | -6.4  | 2.53 | -0.752 | -1.98 |
| chr7  | 1.01E+08 | 1.01E+08 | TRIM56    | 3.20E-08 | + | 1.01E+08 | 1.01E+08 | 0 | 1 | 1998,                     |         | 0 | -7.49 | -7.02 | 10.4 | -0.751 | -1.98 |
| chr19 | 51337351 | 51337451 | VSIG10L   | 0.00037  | - | 51337351 | 51337451 | 0 | 1 | 100,                      |         | 0 | -3.43 | -2.43 | 1.17 | -0.748 | -1.98 |
| chr16 | 30527015 | 30527311 | AC002310  | 4.70E-08 | + | 30527015 | 30527311 | 0 | 1 | 296,                      |         | 0 | -7.33 | -6.88 | 3    | -0.748 | -1.98 |
| chr13 | 98448477 | 98448578 | STK24     | 0.00017  | - | 98448477 | 98448578 | 0 | 1 | 101,                      |         | 0 | -3.76 | -2.73 | 1.54 | -0.745 | -1.97 |
| chr5  | 1.4E+08  | 1.4E+08  | NRG2      | 0.0011   | - | 1.4E+08  | 1.4E+08  | 0 | 1 | 349,                      |         | 0 | -2.95 | -2.81 | 11.8 | -0.746 | -1.97 |
| chr11 | 35663023 | 35663672 | TRIM44    | 7.90E-14 | + | 35663023 | 35663672 | 0 | 1 | 649,                      |         | 0 | -13.1 | -11.5 | 2.59 | -0.744 | -1.97 |
| chr5  | 1.41E+08 | 1.41E+08 | PCDHGA1   | 0.0011   | + | 1.41E+08 | 1.41E+08 | 0 | 1 | 101,                      |         | 0 | -2.94 | -1.97 | 1.75 | -0.743 | -1.97 |
| chr19 | 8444911  | 8445157  | AC136469  | 9.10E-09 | - | 8444911  | 8445157  | 0 | 1 | 246,                      |         | 0 | -8.04 | -7.5  | 1.82 | -0.743 | -1.97 |
| chr5  | 1.54E+08 | 1.54E+08 | SAP30L    | 9.30E-10 | + | 1.54E+08 | 1.54E+08 | 0 | 1 | 349,                      |         | 0 | -9.03 | -8.35 | 6    | -0.736 | -1.96 |
| chr2  | 96208501 | 96208800 | STARD7-A  | 1.20E-08 | + | 96208501 | 96208800 | 0 | 1 | 299,                      |         | 0 | -7.91 | -7.39 | 2.45 | -0.736 | -1.96 |
| chr11 | 58609990 | 58612297 | ZFP91-CN  | 1.80E-10 | + | 58609990 | 58612297 | 0 | 5 | 49,37,105,130,307,959,161 |         |   | -9.75 | -8.93 | 1.79 | -0.738 | -1.96 |
| chr7  | 44885051 | 44885450 | AC004854  | 7.10E-08 | + | 44885051 | 44885450 | 0 | 1 | 399,                      |         | 0 | -7.15 | -6.72 | 3.36 | -0.738 | -1.96 |
| chr22 | 36141519 | 36141718 | APOL3     | 5.00E-06 | - | 36141519 | 36141718 | 0 | 1 | 199,                      |         | 0 | -5.3  | -4.11 | 2.17 | -0.729 | -1.95 |
| chr10 | 60059905 | 60060006 | ANK3      | 6.30E-05 | - | 60059905 | 60060006 | 0 | 1 | 101,                      |         | 0 | -4.2  | -3.13 | 1.36 | -0.735 | -1.95 |
| chr17 | 4143464  | 4143664  | CYB5D2    | 1.90E-05 | + | 4143464  | 4143664  | 0 | 1 | 200,                      |         | 0 | -4.72 | -4.51 | 2.92 | -0.733 | -1.95 |
| chr3  | 1.78E+08 | 1.78E+08 | LINC0057E | 5.60E-06 | + | 1.78E+08 | 1.78E+08 | 0 | 1 | 150,                      |         | 0 | -5.25 | -4.07 | 2.8  | -0.732 | -1.95 |
| chr8  | 76707813 | 76707964 | ZFHx4     | 0.0015   | + | 76707813 | 76707964 | 0 | 1 | 151,                      |         | 0 | -2.81 | -1.86 | 2.29 | -0.729 | -1.94 |
| chr22 | 43946522 | 43946672 | PNPLA3    | 0.0023   | + | 43946522 | 43946672 | 0 | 1 | 150,                      |         | 0 | -2.64 | -1.7  | 4    | -0.727 | -1.94 |
| chr17 | 64500164 | 64500587 | DDX5      | 3.70E-07 | - | 64500164 | 64500587 | 0 | 2 | 162,39,                   | 0,384   |   | -6.43 | -6.09 | 1.83 | -0.723 | -1.94 |
| chrM  | 15489    | 15689    | MT-CYB    | 1.30E-63 | + | 15489    | 15689    | 0 | 1 | 200,                      |         | 0 | -62.9 | -59.6 | 1.09 | -0.729 | -1.94 |
| chr8  | 26508674 | 26508873 | PNMA2     | 0.0011   | - | 26508674 | 26508873 | 0 | 1 | 199,                      |         | 0 | -2.95 | -1.99 | 2.5  | -0.729 | -1.94 |

|       |          |          |          |          |   |          |          |   |   |                           |             |       |       |      |        |       |
|-------|----------|----------|----------|----------|---|----------|----------|---|---|---------------------------|-------------|-------|-------|------|--------|-------|
| chr1  | 22576658 | 22576758 | EPHA8    | 4.60E-05 | + | 22576658 | 22576758 | 0 | 1 | 100,                      | 0           | -4.34 | -3.25 | 3.5  | -0.722 | -1.93 |
| chr7  | 905390   | 919990   | ADAP1    | 8.50E-07 | - | 905390   | 919990   | 0 | 2 | 226,23,                   | 0,14577     | -6.07 | -5.75 | 4.71 | -0.723 | -1.93 |
| chr2  | 69643836 | 69674049 | AAK1     | 4.70E-05 | - | 69643836 | 69674049 | 0 | 2 | 124,27,                   | 0,30186     | -4.33 | -3.25 | 3.22 | -0.722 | -1.93 |
| chr18 | 57477201 | 57477352 | ONECUT2  | 0.00021  | + | 57477201 | 57477352 | 0 | 1 | 151,                      | 0           | -3.68 | -2.66 | 2.8  | -0.723 | -1.93 |
| chr1  | 39411853 | 39412803 | MACF1    | 2.00E-08 | + | 39411853 | 39412803 | 0 | 1 | 950,                      | 0           | -7.69 | -7.19 | 7.4  | -0.721 | -1.93 |
| chr10 | 7964897  | 7977291  | TAF3     | 7.90E-11 | + | 7964897  | 7977291  | 0 | 2 | 845,51,                   | 0,12343     | -10.1 | -9.22 | 10.9 | -0.722 | -1.93 |
| chr22 | 19448092 | 19448292 | AC000068 | 5.20E-06 | + | 19448092 | 19448292 | 0 | 1 | 200,                      | 0           | -5.28 | -4.09 | 3.6  | -0.722 | -1.93 |
| chr11 | 58609987 | 58612297 | ZFP91    | 4.00E-10 | + | 58609987 | 58612297 | 0 | 5 | 52,37,105,130,310,962,161 |             | -9.4  | -8.65 | 1.79 | -0.722 | -1.93 |
| chr2  | 2.32E+08 | 2.32E+08 | PTMA     | 0.00055  | + | 2.32E+08 | 2.32E+08 | 0 | 1 | 100,                      | 0           | -3.26 | -3.12 | 2    | -0.722 | -1.93 |
| chr19 | 1776505  | 1776954  | ONECUT3  | 0.00023  | + | 1776505  | 1776954  | 0 | 1 | 449,                      | 0           | -3.63 | -3.47 | 8.14 | -0.722 | -1.93 |
| chr1  | 32470599 | 32470700 | ZBTB8B   | 4.00E-12 | + | 32470599 | 32470700 | 0 | 1 | 101,                      | 0           | -11.4 | -9.22 | 2.22 | -0.722 | -1.93 |
| chr8  | 76705700 | 76705801 | ZFXH4    | 0.00043  | + | 76705700 | 76705801 | 0 | 1 | 101,                      | 0           | -3.37 | -3.22 | 12   | -0.715 | -1.92 |
| chr11 | 1.08E+08 | 1.08E+08 | ATM      | 0.0038   | + | 1.08E+08 | 1.08E+08 | 0 | 1 | 101,                      | 0           | -2.42 | -1.5  | 1.67 | -0.717 | -1.92 |
| chr19 | 43997638 | 43997788 | AC006213 | 0.0027   | - | 43997638 | 43997788 | 0 | 1 | 150,                      | 0           | -2.57 | -2.44 | 5.13 | -0.713 | -1.92 |
| chr19 | 45940000 | 45940249 | NOVA2    | 0.0026   | - | 45940000 | 45940249 | 0 | 1 | 249,                      | 0           | -2.59 | -2.47 | 6.14 | -0.709 | -1.91 |
| chr10 | 17142270 | 17142719 | TRDMT1   | 2.40E-07 | - | 17142270 | 17142719 | 0 | 1 | 449,                      | 0           | -6.62 | -5.27 | 4.17 | -0.705 | -1.91 |
| chr2  | 1.19E+08 | 1.19E+08 | STEAP3   | 4.00E-04 | + | 1.19E+08 | 1.19E+08 | 0 | 1 | 299,                      | 0           | -3.4  | -3.26 | 6.17 | -0.707 | -1.91 |
| chr17 | 30180994 | 30185732 | NSRP1    | 2.00E-14 | + | 30180994 | 30185732 | 0 | 2 | 22,1118,                  | 0,3620      | -13.7 | -12   | 7.15 | -0.706 | -1.91 |
| chr17 | 48613296 | 48613479 | HOXB8    | 3.20E-26 | - | 48613296 | 48613479 | 0 | 1 | 183,                      | 0           | -25.5 | -22.9 | 6.39 | -0.704 | -1.9  |
| chr7  | 1.35E+08 | 1.35E+08 | CALD1    | 1.00E-09 | + | 1.35E+08 | 1.35E+08 | 0 | 1 | 201,                      | 0           | -8.98 | -8.31 | 1.29 | -0.699 | -1.9  |
| chr15 | 75049321 | 75049622 | PPCDC    | 9.50E-10 | + | 75049321 | 75049622 | 0 | 1 | 301,                      | 0           | -9.02 | -8.34 | 4.41 | -0.704 | -1.9  |
| chr2  | 1.8E+08  | 1.8E+08  | CWC22    | 3.20E-11 | - | 1.8E+08  | 1.8E+08  | 0 | 2 | 493,104,                  | 0,5289      | -10.5 | -9.57 | 8.5  | -0.699 | -1.9  |
| chr11 | 64988438 | 64988636 | BATF2    | 1.00E-04 | - | 64988438 | 64988636 | 0 | 1 | 198,                      | 0           | -3.99 | -2.94 | 1.43 | -0.702 | -1.9  |
| chr15 | 84641275 | 84641376 | WDR73    | 0.00021  | - | 84641275 | 84641376 | 0 | 1 | 101,                      | 0           | -3.67 | -2.65 | 2    | -0.699 | -1.9  |
| chr10 | 79684640 | 79684983 | AL132656 | 3.20E-26 | - | 79684640 | 79684983 | 0 | 1 | 343,                      | 0           | -25.5 | -22.9 | 7    | -0.699 | -1.9  |
| chr13 | 30658680 | 30658830 | USPL1    | 1.70E-06 | + | 30658680 | 30658830 | 0 | 1 | 150,                      | 0           | -5.77 | -4.52 | 2.17 | -0.696 | -1.89 |
| chr10 | 13707289 | 13707390 | FRMD4A   | 0.00014  | - | 13707289 | 13707390 | 0 | 1 | 101,                      | 0           | -3.85 | -2.81 | 2    | -0.698 | -1.89 |
| chr5  | 1293942  | 1294293  | TERT     | 1.50E-06 | - | 1293942  | 1294293  | 0 | 1 | 351,                      | 0           | -5.81 | -5.52 | 5.5  | -0.695 | -1.89 |
| chr19 | 4494206  | 4496332  | HDFGL2   | 1.00E-11 | + | 4494206  | 4496332  | 0 | 2 | 269,31,                   | 0,2095      | -11   | -9.96 | 1.2  | -0.695 | -1.89 |
| chr18 | 12326048 | 12326544 | TUBB6    | 7.90E-11 | + | 12326048 | 12326544 | 0 | 1 | 496,                      | 0           | -10.1 | -9.22 | 4.6  | -0.698 | -1.89 |
| chr6  | 1.6E+08  | 1.6E+08  | IGF2R    | 3.20E-11 | + | 1.6E+08  | 1.6E+08  | 0 | 3 | 2,70,729,                 | 0,1076,2004 | -10.5 | -9.55 | 5.41 | -0.696 | -1.89 |
| chr5  | 1.39E+08 | 1.39E+08 | PROB1    | 0.00043  | - | 1.39E+08 | 1.39E+08 | 0 | 1 | 100,                      | 0           | -3.37 | -2.37 | 2    | -0.698 | -1.89 |
| chr19 | 49850933 | 49851281 | PTOV1    | 1.00E-04 | + | 49850933 | 49851281 | 0 | 1 | 348,                      | 0           | -4    | -3.83 | 3.57 | -0.691 | -1.88 |
| chr6  | 10528640 | 10528890 | GCNT2    | 5.00E-07 | + | 10528640 | 10528890 | 0 | 1 | 250,                      | 0           | -6.3  | -5.97 | 3.44 | -0.688 | -1.88 |
| chr12 | 389372   | 389523   | CCDC77   | 6.30E-06 | + | 389372   | 389523   | 0 | 1 | 151,                      | 0           | -5.2  | -4.96 | 3.71 | -0.689 | -1.88 |
| chr4  | 1.39E+08 | 1.39E+08 | PPP1R14B | 0.00065  | - | 1.39E+08 | 1.39E+08 | 0 | 1 | 100,                      | 0           | -3.19 | -2.21 | 2.45 | -0.691 | -1.88 |
| chr17 | 74917762 | 74917911 | USH1G    | 0.00025  | - | 74917762 | 74917911 | 0 | 1 | 149,                      | 0           | -3.61 | -2.6  | 4.71 | -0.688 | -1.88 |
| chr9  | 38622292 | 38622493 | FAM201A  | 9.30E-08 | + | 38622292 | 38622493 | 0 | 1 | 201,                      | 0           | -7.03 | -6.62 | 8    | -0.689 | -1.88 |
| chr11 | 18588830 | 18595650 | SPTY2D1C | 3.20E-11 | + | 18588830 | 18595650 | 0 | 2 | 165,34,                   | 0,6786      | -10.5 | -9.52 | 3.19 | -0.689 | -1.88 |
| chr9  | 35609582 | 35609981 | CD72     | 7.90E-18 | - | 35609582 | 35609981 | 0 | 1 | 399,                      | 0           | -17.1 | -14.9 | 11.9 | -0.682 | -1.87 |
| chr19 | 44066467 | 44066616 | AC092072 | 4.70E-06 | + | 44066467 | 44066616 | 0 | 1 | 149,                      | 0           | -5.33 | -4.13 | 5.6  | -0.682 | -1.87 |
| chr11 | 76381551 | 76382251 | GVQW3    | 4.60E-09 | + | 76381551 | 76382251 | 0 | 1 | 700,                      | 0           | -8.34 | -7.76 | 17.2 | -0.688 | -1.87 |
| chr6  | 75890078 | 75892563 | MYO6     | 5.80E-10 | + | 75890078 | 75892563 | 0 | 3 | 187,79,34,                | 0,1149,2451 | -9.24 | -8.52 | 2.47 | -0.682 | -1.87 |
| chr19 | 47430054 | 47430155 | SLC8A2   | 0.005    | - | 47430054 | 47430155 | 0 | 1 | 101,                      | 0           | -2.3  | -1.38 | 5.25 | -0.677 | -1.86 |
| chr5  | 1.41E+08 | 1.41E+08 | WDR55    | 5.00E-11 | + | 1.41E+08 | 1.41E+08 | 0 | 2 | 4,446,                    | 0,88        | -10.3 | -9.38 | 3.83 | -0.677 | -1.86 |
| chr6  | 2765960  | 2766209  | WRNIP1   | 1.40E-07 | + | 2765960  | 2766209  | 0 | 1 | 249,                      | 0           | -6.84 | -6.45 | 1.94 | -0.679 | -1.86 |
| chr19 | 17504526 | 17504776 | SLC27A1  | 2.60E-05 | + | 17504526 | 17504776 | 0 | 1 | 250,                      | 0           | -4.59 | -4.38 | 4.4  | -0.681 | -1.86 |
| chr2  | 43699777 | 43700077 | PLEKHH2  | 1.90E-06 | + | 43699777 | 43700077 | 0 | 1 | 300,                      | 0           | -5.71 | -4.47 | 4    | -0.679 | -1.86 |
| chr11 | 11942334 | 11943033 | USP47    | 2.00E-14 | + | 11942334 | 11943033 | 0 | 1 | 699,                      | 0           | -13.7 | -12   | 9.2  | -0.681 | -1.86 |
| chr7  | 1E+08    | 1E+08    | ASP4M1   | 4.90E-09 | + | 1E+08    | 1E+08    | 0 | 1 | 300,                      | 0           | -8.31 | -7.74 | 9.5  | -0.677 | -1.86 |
| chr18 | 76492590 | 76492935 | AC018413 | 0.00012  | + | 76492590 | 76492935 | 0 | 1 | 345,                      | 0           | -3.92 | -3.75 | 4.31 | -0.676 | -1.86 |

|       |          |          |           |          |   |          |          |   |   |            |             |       |       |      |        |       |
|-------|----------|----------|-----------|----------|---|----------|----------|---|---|------------|-------------|-------|-------|------|--------|-------|
| chr3  | 89209927 | 89210027 | EPHA3     | 4.10E-05 | + | 89209927 | 89210027 | 0 | 1 | 100,       | 0           | -4.39 | -3.3  | 5.8  | -0.676 | -1.85 |
| chr17 | 81557186 | 81557287 | NPLOC4    | 3.80E-08 | - | 81557186 | 81557287 | 0 | 1 | 101,       | 0           | -7.42 | -6.97 | 2.2  | -0.676 | -1.85 |
| chr10 | 12828824 | 12829124 | CAMK1D    | 3.30E-09 | + | 12828824 | 12829124 | 0 | 1 | 300,       | 0           | -8.48 | -7.89 | 9.5  | -0.669 | -1.85 |
| chr14 | 23940117 | 23940867 | DHRS4-AS  | 1.40E-08 | - | 23940117 | 23940867 | 0 | 1 | 750,       | 0           | -7.85 | -7.33 | 6.25 | -0.676 | -1.85 |
| chr6  | 2481037  | 2481187  | GMDS-DT   | 0.00063  | + | 2481037  | 2481187  | 0 | 1 | 150,       | 0           | -3.2  | -2.22 | 2.25 | -0.669 | -1.85 |
| chrX  | 1.54E+08 | 1.54E+08 | PLXNA3    | 0.00074  | + | 1.54E+08 | 1.54E+08 | 0 | 1 | 150,       | 0           | -3.13 | -2.15 | 2.67 | -0.668 | -1.84 |
| chr7  | 47277396 | 47277497 | TNS3      | 0.00048  | - | 47277396 | 47277497 | 0 | 1 | 101,       | 0           | -3.32 | -2.33 | 3    | -0.668 | -1.84 |
| chr12 | 57225031 | 57225227 | NXPH4     | 2.60E-05 | + | 57225031 | 57225227 | 0 | 1 | 196,       | 0           | -4.59 | -4.38 | 4.8  | -0.668 | -1.84 |
| chr8  | 23100651 | 23103409 | AC107959  | 3.50E-08 | + | 23100651 | 23103409 | 0 | 2 | 33,713,    | 0,2045      | -7.46 | -7    | 8    | -0.664 | -1.84 |
| chr6  | 15246118 | 15246269 | JARID2    | 0.0015   | + | 15246118 | 15246269 | 0 | 1 | 151,       | 0           | -2.83 | -2.7  | 2.65 | -0.661 | -1.83 |
| chrX  | 1.54E+08 | 1.54E+08 | DNASE1L1  | 1.80E-09 | - | 1.54E+08 | 1.54E+08 | 0 | 1 | 100,       | 0           | -8.75 | -7.08 | 2.57 | -0.663 | -1.83 |
| chr19 | 58499581 | 58500559 | SAC27A5   | 0.0028   | - | 58499581 | 58500559 | 0 | 3 | 109,91,48, | 0,757,930   | -2.56 | -2.44 | 4.69 | -0.663 | -1.83 |
| chr1  | 36178046 | 36178853 | MLP7D1    | 8.50E-10 | + | 36178046 | 36178853 | 0 | 2 | 155,443,   | 0,364       | -9.07 | -8.38 | 3    | -0.663 | -1.83 |
| chr10 | 72005784 | 72005885 | CHST3     | 0.001    | + | 72005784 | 72005885 | 0 | 1 | 101,       | 0           | -3    | -2.87 | 2.18 | -0.664 | -1.83 |
| chr19 | 11145998 | 11146397 | SPC24     | 1.30E-12 | - | 11145998 | 11146397 | 0 | 1 | 399,       | 0           | -11.9 | -10.6 | 4.7  | -0.663 | -1.83 |
| chr19 | 3958602  | 3959602  | DAPK3     | 1.30E-11 | - | 3958602  | 3959602  | 0 | 1 | 1000,      | 0           | -10.9 | -9.89 | 10.4 | -0.663 | -1.83 |
| chr8  | 1.44E+08 | 1.44E+08 | PLEC      | 1.90E-07 | - | 1.44E+08 | 1.44E+08 | 0 | 1 | 251,       | 0           | -6.71 | -6.34 | 1.92 | -0.663 | -1.83 |
| chrX  | 76428916 | 76429116 | MAGEE1    | 1.40E-06 | + | 76428916 | 76429116 | 0 | 1 | 200,       | 0           | -5.85 | -4.6  | 3.4  | -0.663 | -1.83 |
| chr2  | 38076549 | 38082722 | CYP1B1-A  | 9.50E-06 | + | 38076549 | 38082722 | 0 | 3 | 11,65,25,  | 0,5922,6148 | -5.02 | -3.87 | 5.5  | -0.664 | -1.83 |
| chr19 | 13831328 | 13831579 | AC020916  | 1.70E-06 | - | 13831328 | 13831579 | 0 | 1 | 251,       | 0           | -5.76 | -4.52 | 2.38 | -0.664 | -1.83 |
| chr8  | 66430230 | 66442836 | AC009879  | 2.50E-23 | + | 66430230 | 66442836 | 0 | 2 | 148,39,    | 0,12567     | -22.6 | -20.1 | 8.69 | -0.663 | -1.83 |
| chr6  | 1.16E+08 | 1.16E+08 | DSE       | 8.30E-09 | + | 1.16E+08 | 1.16E+08 | 0 | 2 | 45,105,    | 0,28121     | -8.08 | -7.54 | 2    | -0.66  | -1.82 |
| chr20 | 14326427 | 14326528 | FLRT3     | 8.30E-07 | - | 14326427 | 14326528 | 0 | 1 | 101,       | 0           | -6.08 | -4.8  | 4.5  | -0.658 | -1.82 |
| chr9  | 1.16E+08 | 1.16E+08 | ASTN2     | 9.10E-06 | - | 1.16E+08 | 1.16E+08 | 0 | 1 | 201,       | 0           | -5.04 | -3.88 | 3.67 | -0.66  | -1.82 |
| chr10 | 1.03E+08 | 1.03E+08 | CNNM2     | 2.00E-09 | + | 1.03E+08 | 1.03E+08 | 0 | 1 | 450,       | 0           | -8.7  | -8.07 | 2.15 | -0.659 | -1.82 |
| chr19 | 9758181  | 9758331  | ZNF846    | 0.00043  | - | 9758181  | 9758331  | 0 | 1 | 150,       | 0           | -3.37 | -2.37 | 4.5  | -0.66  | -1.82 |
| chr6  | 27133891 | 27134042 | HIST1H2A  | 5.80E-06 | + | 27133891 | 27134042 | 0 | 1 | 151,       | 0           | -5.24 | -4.05 | 2.89 | -0.659 | -1.82 |
| chr5  | 1.81E+08 | 1.81E+08 | RACK1     | 3.20E-08 | - | 1.81E+08 | 1.81E+08 | 0 | 1 | 150,       | 0           | -7.5  | -7.03 | 2.18 | -0.658 | -1.82 |
| chr13 | 81690152 | 81690443 | PTMAP5    | 1.40E-07 | + | 81690152 | 81690443 | 0 | 1 | 291,       | 0           | -6.84 | -6.45 | 5.25 | -0.659 | -1.82 |
| chr12 | 49018985 | 49019136 | DDN-AS1   | 0.0048   | + | 49018985 | 49019136 | 0 | 1 | 151,       | 0           | -2.32 | -2.2  | 5    | -0.658 | -1.82 |
| chr10 | 38451555 | 38451755 | AL133216  | 0.0047   | + | 38451555 | 38451755 | 0 | 1 | 200,       | 0           | -2.33 | -1.42 | 3.6  | -0.66  | -1.82 |
| chr5  | 473249   | 473350   | SLC9A3    | 0.00069  | - | 473249   | 473350   | 0 | 1 | 101,       | 0           | -3.16 | -3.02 | 1.77 | -0.653 | -1.81 |
| chr19 | 18155572 | 18155971 | PIK3R2    | 6.90E-06 | + | 18155572 | 18155971 | 0 | 1 | 399,       | 0           | -5.16 | -4.92 | 3.41 | -0.655 | -1.81 |
| chr2  | 2.2E+08  | 2.2E+08  | OBSL1     | 1.10E-05 | - | 2.2E+08  | 2.2E+08  | 0 | 1 | 200,       | 0           | -4.96 | -4.73 | 3.29 | -0.653 | -1.81 |
| chr10 | 95876465 | 95876666 | ENTPD1    | 0.00044  | + | 95876465 | 95876666 | 0 | 1 | 201,       | 0           | -3.36 | -2.36 | 2.09 | -0.655 | -1.81 |
| chr10 | 277076   | 277525   | DIP2C     | 8.70E-07 | - | 277076   | 277525   | 0 | 1 | 449,       | 0           | -6.06 | -5.75 | 8    | -0.653 | -1.81 |
| chrX  | 73850575 | 73850676 | XIST      | 3.70E-06 | - | 73850575 | 73850676 | 0 | 1 | 101,       | 0           | -5.43 | -5.16 | 2    | -0.655 | -1.81 |
| chrX  | 1.5E+08  | 1.5E+08  | LINC00894 | 2.00E-13 | + | 1.5E+08  | 1.5E+08  | 0 | 2 | 231,19,    | 0,1008      | -12.7 | -11.2 | 4.2  | -0.653 | -1.81 |
| chr19 | 57516086 | 57516381 | AC003005  | 0.00042  | + | 57516086 | 57516381 | 0 | 1 | 295,       | 0           | -3.38 | -2.38 | 5.5  | -0.654 | -1.81 |
| chr19 | 58349626 | 58350368 | AC012313  | 3.40E-06 | - | 58349626 | 58350368 | 0 | 1 | 742,       | 0           | -5.47 | -5.2  | 14.5 | -0.655 | -1.81 |
| chr2  | 69829709 | 69837553 | GMCL1     | 3.20E-11 | + | 69829709 | 69837553 | 0 | 2 | 443,7,     | 0,7837      | -10.5 | -9.53 | 2.98 | -0.652 | -1.8  |
| chr18 | 57435623 | 57435724 | ONECUT2   | 0.00034  | + | 57435623 | 57435724 | 0 | 1 | 101,       | 0           | -3.47 | -2.47 | 2.67 | -0.652 | -1.8  |
| chr20 | 62285952 | 62286203 | OSBPL2    | 8.30E-06 | + | 62285952 | 62286203 | 0 | 1 | 251,       | 0           | -5.08 | -3.92 | 5.75 | -0.65  | -1.8  |
| chr19 | 14518270 | 14527390 | DNAJB1    | 1.30E-08 | - | 14518270 | 14527390 | 0 | 2 | 127,24,    | 0,9096      | -7.88 | -7.36 | 2.11 | -0.649 | -1.8  |
| chr20 | 45878031 | 45878478 | ZSWIM3    | 2.30E-05 | + | 45878031 | 45878478 | 0 | 1 | 447,       | 0           | -4.63 | -3.52 | 5    | -0.649 | -1.8  |
| chr11 | 32853725 | 32854076 | PRRG4     | 2.40E-07 | + | 32853725 | 32854076 | 0 | 1 | 351,       | 0           | -6.62 | -6.26 | 9.85 | -0.649 | -1.8  |
| chr2  | 95158982 | 95159333 | ZNF514    | 1.70E-06 | - | 95158982 | 95159333 | 0 | 1 | 351,       | 0           | -5.77 | -5.48 | 3.79 | -0.65  | -1.8  |
| chr11 | 67119412 | 67119562 | KDM2A     | 0.0011   | + | 67119412 | 67119562 | 0 | 1 | 150,       | 0           | -2.96 | -2.83 | 1.9  | -0.652 | -1.8  |
| chr19 | 11806100 | 11806200 | ZNF491    | 3.20E-06 | + | 11806100 | 11806200 | 0 | 1 | 100,       | 0           | -5.49 | -4.28 | 3.5  | -0.651 | -1.8  |
| chr2  | 1.66E+08 | 1.66E+08 | CSRNP3    | 4.00E-08 | + | 1.66E+08 | 1.66E+08 | 0 | 1 | 101,       | 0           | -7.4  | -5.94 | 3.75 | -0.651 | -1.8  |
| chr16 | 27749629 | 27750228 | KIAA0556  | 2.70E-07 | + | 27749629 | 27750228 | 0 | 1 | 599,       | 0           | -6.57 | -6.21 | 8.83 | -0.643 | -1.79 |

|       |          |          |           |          |   |          |          |   |   |                           |              |       |       |      |        |       |
|-------|----------|----------|-----------|----------|---|----------|----------|---|---|---------------------------|--------------|-------|-------|------|--------|-------|
| chr2  | 1.78E+08 | 1.78E+08 | PDE11A    | 1.40E-05 | - | 1.78E+08 | 1.78E+08 | 0 | 1 | 150,                      | 0            | -4.84 | -3.71 | 9.5  | -0.643 | -1.79 |
| chr9  | 98011331 | 98015550 | ANP32B    | 1.20E-07 | + | 98011331 | 98015550 | 0 | 3 | 58,52,187,                | 0,1089,4032  | -6.92 | -6.52 | 1.45 | -0.647 | -1.79 |
| chr19 | 14074767 | 14074964 | MISP3     | 3.10E-05 | + | 14074767 | 14074964 | 0 | 1 | 197,                      | 0            | -4.51 | -4.31 | 8.7  | -0.644 | -1.79 |
| chr6  | 26156730 | 26156966 | HIST1H1E  | 1.30E-05 | + | 26156730 | 26156966 | 0 | 1 | 236,                      | 0            | -4.88 | -4.66 | 1.15 | -0.644 | -1.79 |
| chr19 | 58573552 | 58575471 | CENPBD1F  | 1.00E-12 | + | 58573552 | 58575471 | 0 | 2 | 117,34,                   | 0,1885       | -12   | -10.7 | 6    | -0.643 | -1.79 |
| chr12 | 89525635 | 89540146 | POC1B-AS  | 4.20E-06 | + | 89525635 | 89540146 | 0 | 2 | 161,39,                   | 0,14472      | -5.38 | -5.12 | 4.92 | -0.648 | -1.79 |
| chr1  | 36296687 | 36304314 | THRAP3    | 3.20E-11 | + | 36296687 | 36304314 | 0 | 4 | 83,199,144,50,4198,4865,7 |              | -10.5 | -9.52 | 2.86 | -0.64  | -1.78 |
| chr6  | 34059324 | 34059425 | GRM4      | 0.00032  | - | 34059324 | 34059425 | 0 | 1 | 101,                      | 0            | -3.49 | -2.48 | 2    | -0.64  | -1.78 |
| chr19 | 17726275 | 17726376 | MAP1S     | 1.60E-11 | + | 17726275 | 17726376 | 0 | 1 | 101,                      | 0            | -10.8 | -8.68 | 1.75 | -0.64  | -1.78 |
| chr19 | 10115063 | 10115512 | EIF3G     | 8.90E-07 | - | 10115063 | 10115512 | 0 | 2 | 66,34,                    | 0,415        | -6.05 | -5.74 | 4.83 | -0.639 | -1.78 |
| chr14 | 24426925 | 24427419 | CBLN3     | 1.60E-05 | - | 24426925 | 24427419 | 0 | 1 | 494,                      | 0            | -4.8  | -3.67 | 5    | -0.64  | -1.78 |
| chr12 | 1.1E+08  | 1.1E+08  | UBE3B     | 7.20E-08 | + | 1.1E+08  | 1.1E+08  | 0 | 1 | 649,                      | 0            | -7.14 | -6.71 | 9.58 | -0.643 | -1.78 |
| chr3  | 1.14E+08 | 1.14E+08 | ZBTB20    | 0.00017  | - | 1.14E+08 | 1.14E+08 | 0 | 1 | 101,                      | 0            | -3.77 | -2.74 | 2    | -0.64  | -1.78 |
| chr4  | 56505803 | 56506099 | ARL9      | 1.10E-08 | + | 56505803 | 56506099 | 0 | 1 | 296,                      | 0            | -7.97 | -7.45 | 7    | -0.639 | -1.78 |
| chr17 | 2043143  | 2043378  | AC090617  | 1.50E-05 | - | 2043143  | 2043378  | 0 | 1 | 235,                      | 0            | -4.83 | -4.61 | 4.21 | -0.639 | -1.78 |
| chr17 | 43164622 | 43165770 | AC060780  | 0.0047   | - | 43164622 | 43165770 | 0 | 2 | 190,11,                   | 0,1137       | -2.33 | -1.42 | 2.8  | -0.64  | -1.78 |
| chr11 | 2644863  | 2644964  | KCNQ1OT   | 0.0017   | - | 2644863  | 2644964  | 0 | 1 | 101,                      | 0            | -2.78 | -1.83 | 1.8  | -0.64  | -1.78 |
| chr6  | 15517243 | 15520244 | JARID2    | 0.00015  | + | 15517243 | 15520244 | 0 | 2 | 25,176,                   | 0,2825       | -3.81 | -3.65 | 1.93 | -0.639 | -1.77 |
| chr11 | 57672062 | 57672660 | ZDHHC5    | 1.60E-13 | + | 57672062 | 57672660 | 0 | 1 | 598,                      | 0            | -12.8 | -11.3 | 5.41 | -0.639 | -1.77 |
| chr21 | 46243579 | 46243680 | MCM3AP    | 2.30E-07 | - | 46243579 | 46243680 | 0 | 1 | 101,                      | 0            | -6.63 | -6.26 | 2.62 | -0.637 | -1.77 |
| chr11 | 1.09E+08 | 1.09E+08 | DDX10     | 1.30E-11 | + | 1.09E+08 | 1.09E+08 | 0 | 3 | 11,466,22,                | 0,3122,11663 | -10.9 | -9.88 | 3.28 | -0.635 | -1.77 |
| chr4  | 3767346  | 3767497  | ADRA2C    | 1.30E-05 | + | 3767346  | 3767497  | 0 | 1 | 151,                      | 0            | -4.87 | -4.65 | 4    | -0.637 | -1.77 |
| chr17 | 1704560  | 1704760  | TLCD2     | 2.10E-10 | - | 1704560  | 1704760  | 0 | 1 | 200,                      | 0            | -9.67 | -8.87 | 2.9  | -0.633 | -1.77 |
| chr16 | 785665   | 786309   | RPUSD1    | 2.10E-09 | - | 785665   | 786309   | 0 | 1 | 644,                      | 0            | -8.67 | -8.05 | 8.06 | -0.626 | -1.76 |
| chr3  | 1.7E+08  | 1.7E+08  | SEC2      | 6.30E-11 | + | 1.7E+08  | 1.7E+08  | 0 | 3 | 28,106,266,               | 0,1257,6948  | -10.2 | -9.32 | 1.78 | -0.626 | -1.76 |
| chr19 | 48297056 | 48297257 | CCDC114   | 0.00014  | - | 48297056 | 48297257 | 0 | 1 | 201,                      | 0            | -3.86 | -2.82 | 6.25 | -0.626 | -1.76 |
| chr1  | 33491039 | 33491734 | ZSCAN20   | 8.50E-09 | + | 33491039 | 33491734 | 0 | 1 | 695,                      | 0            | -8.07 | -7.53 | 9.67 | -0.63  | -1.76 |
| chr11 | 57660816 | 57661117 | CLP1      | 3.50E-06 | + | 57660816 | 57661117 | 0 | 1 | 301,                      | 0            | -5.45 | -5.19 | 4.94 | -0.626 | -1.76 |
| chr10 | 61453101 | 61453202 | TMEM26    | 1.30E-06 | - | 61453101 | 61453202 | 0 | 1 | 101,                      | 0            | -5.9  | -4.64 | 3.5  | -0.63  | -1.76 |
| chr7  | 1.52E+08 | 1.52E+08 | LINC01003 | 7.10E-07 | + | 1.52E+08 | 1.52E+08 | 0 | 1 | 148,                      | 0            | -6.15 | -4.86 | 1.43 | -0.626 | -1.76 |
| chr19 | 56684905 | 56685056 | AC006115  | 0.00066  | + | 56684905 | 56685056 | 0 | 1 | 151,                      | 0            | -3.18 | -2.2  | 2.75 | -0.629 | -1.76 |
| chr12 | 1.24E+08 | 1.24E+08 | CCDC92    | 1.60E-07 | - | 1.24E+08 | 1.24E+08 | 0 | 3 | 351,42,6,                 | 0,5264,5867  | -6.79 | -6.41 | 2.4  | -0.622 | -1.75 |
| chr9  | 1.25E+08 | 1.25E+08 | ARPC5L    | 2.20E-10 | + | 1.25E+08 | 1.25E+08 | 0 | 2 | 134,312,                  | 0,1860       | -9.66 | -8.86 | 3.64 | -0.624 | -1.75 |
| chr12 | 55927479 | 55927739 | PYM1      | 0.0024   | - | 55927479 | 55927739 | 0 | 2 | 134,15,                   | 0,245        | -2.62 | -2.5  | 3.6  | -0.624 | -1.75 |
| chr11 | 62724385 | 62727422 | HNRNPUL   | 4.00E-11 | - | 62724385 | 62727422 | 0 | 2 | 41,804,                   | 0,2233       | -10.4 | -9.47 | 2.33 | -0.625 | -1.75 |
| chr17 | 81031366 | 81032958 | BAIAP2-D  | 4.00E-05 | - | 81031366 | 81032958 | 0 | 1 | 1592,                     | 0            | -4.4  | -4.21 | 6.75 | -0.622 | -1.75 |
| chr11 | 1.03E+08 | 1.03E+08 | AP000619  | 5.80E-06 | - | 1.03E+08 | 1.03E+08 | 0 | 1 | 148,                      | 0            | -5.24 | -4.06 | 2.25 | -0.622 | -1.75 |
| chr12 | 1.22E+08 | 1.22E+08 | AC145422  | 6.00E-07 | + | 1.22E+08 | 1.22E+08 | 0 | 1 | 198,                      | 0            | -6.22 | -5.89 | 2.8  | -0.625 | -1.75 |
| chr10 | 22329115 | 22329493 | COMMD3    | 5.00E-06 | + | 22329115 | 22329493 | 0 | 2 | 13,281,                   | 0,97         | -5.3  | -5.05 | 2.72 | -0.62  | -1.75 |
| chrX  | 1.2E+08  | 1.2E+08  | RNF113A   | 2.80E-07 | - | 1.2E+08  | 1.2E+08  | 0 | 1 | 773,                      | 0            | -6.55 | -6.19 | 5.92 | -0.617 | -1.74 |
| chr6  | 1.68E+08 | 1.68E+08 | AFDN      | 1.00E-10 | + | 1.68E+08 | 1.68E+08 | 0 | 1 | 650,                      | 0            | -10   | -9.16 | 3.06 | -0.619 | -1.74 |
| chrX  | 1.54E+08 | 1.54E+08 | SLC6A8    | 1.00E-06 | + | 1.54E+08 | 1.54E+08 | 0 | 1 | 100,                      | 0            | -6    | -5.69 | 3.3  | -0.615 | -1.74 |
| chr19 | 14074424 | 14074670 | MISP3     | 3.10E-05 | + | 14074424 | 14074670 | 0 | 1 | 246,                      | 0            | -4.51 | -4.31 | 4.43 | -0.617 | -1.74 |
| chr10 | 1.1E+08  | 1.1E+08  | ADD3      | 0.00028  | + | 1.1E+08  | 1.1E+08  | 0 | 1 | 101,                      | 0            | -3.56 | -2.55 | 2.67 | -0.619 | -1.74 |
| chr8  | 1.3E+08  | 1.3E+08  | ASAP1     | 1.10E-07 | - | 1.3E+08  | 1.3E+08  | 0 | 2 | 19,182,                   | 0,19969      | -6.95 | -6.54 | 2    | -0.617 | -1.74 |
| chr6  | 99432073 | 99432223 | AL513550  | 0.001    | + | 99432073 | 99432223 | 0 | 1 | 150,                      | 0            | -2.98 | -2.85 | 4.56 | -0.619 | -1.74 |
| chr19 | 55217134 | 55217281 | AC010327  | 0.00013  | - | 55217134 | 55217281 | 0 | 1 | 147,                      | 0            | -3.9  | -2.85 | 3    | -0.618 | -1.74 |
| chr4  | 42086111 | 42086312 | SLC30A9   | 2.50E-13 | + | 42086111 | 42086312 | 0 | 1 | 201,                      | 0            | -12.6 | -11.2 | 5.65 | -0.609 | -1.73 |
| chr19 | 6381422  | 6381572  | CTCF2F1   | 3.20E-16 | - | 6381422  | 6381572  | 0 | 1 | 150,                      | 0            | -15.5 | -13.5 | 1.54 | -0.612 | -1.73 |
| chr19 | 13906250 | 13906351 | CC2D1A    | 0.00025  | + | 13906250 | 13906351 | 0 | 1 | 101,                      | 0            | -3.61 | -3.46 | 1.27 | -0.611 | -1.73 |
| chr10 | 94246084 | 94246584 | PLCE1     | 1.40E-05 | + | 94246084 | 94246584 | 0 | 1 | 500,                      | 0            | -4.86 | -4.64 | 9.4  | -0.611 | -1.73 |

|       |          |          |           |          |   |          |          |   |   |             |             |       |       |      |        |       |
|-------|----------|----------|-----------|----------|---|----------|----------|---|---|-------------|-------------|-------|-------|------|--------|-------|
| chr15 | 75347154 | 75347454 | NEIL1     | 0.0044   | + | 75347154 | 75347454 | 0 | 1 | 300,        | 0           | -2.36 | -1.44 | 7    | -0.609 | -1.73 |
| chr10 | 1.32E+08 | 1.32E+08 | C10orf91  | 0.00014  | + | 1.32E+08 | 1.32E+08 | 0 | 1 | 101,        | 0           | -3.86 | -2.82 | 7.5  | -0.612 | -1.73 |
| chr8  | 1.43E+08 | 1.43E+08 | ZFP41     | 3.10E-05 | + | 1.43E+08 | 1.43E+08 | 0 | 1 | 150,        | 0           | -4.51 | -3.41 | 4.8  | -0.61  | -1.73 |
| chr16 | 1510675  | 1510976  | IFT140    | 1.20E-05 | - | 1510675  | 1510976  | 0 | 1 | 301,        | 0           | -4.92 | -3.77 | 2.67 | -0.612 | -1.73 |
| chr11 | 62724351 | 62727384 | HNRNPUL1  | 2.00E-12 | - | 62724351 | 62727384 | 0 | 2 | 75,766,     | 0,2267      | -11.7 | -10.5 | 2.47 | -0.611 | -1.73 |
| chr5  | 891283   | 891384   | BRD3      | 1.00E-06 | - | 891283   | 891384   | 0 | 1 | 101,        | 0           | -6    | -5.69 | 2.06 | -0.607 | -1.72 |
| chr1  | 99969500 | 99969801 | SLC35A3   | 0.00015  | + | 99969500 | 99969801 | 0 | 1 | 301,        | 0           | -3.81 | -3.65 | 5.13 | -0.603 | -1.72 |
| chr6  | 34133290 | 34133391 | GRM4      | 2.30E-05 | - | 34133290 | 34133391 | 0 | 1 | 101,        | 0           | -4.64 | -3.53 | 2.5  | -0.604 | -1.72 |
| chr19 | 38730596 | 38730696 | ACTN4     | 0.0037   | + | 38730596 | 38730696 | 0 | 1 | 100,        | 0           | -2.43 | -2.31 | 1.62 | -0.604 | -1.72 |
| chr11 | 1.1E+08  | 1.1E+08  | RDX       | 6.30E-12 | - | 1.1E+08  | 1.1E+08  | 0 | 3 | 289,287,23, | 0,1492,4354 | -11.2 | -10.1 | 4.65 | -0.603 | -1.72 |
| chr19 | 57516161 | 57516411 | ZNF773    | 3.40E-06 | + | 57516161 | 57516411 | 0 | 1 | 250,        | 0           | -5.47 | -4.26 | 5    | -0.605 | -1.72 |
| chr11 | 71501621 | 71501721 | NACDYN1   | 4.80E-05 | + | 71501621 | 71501721 | 0 | 1 | 100,        | 0           | -4.32 | -3.24 | 1.88 | -0.605 | -1.72 |
| chr17 | 63701585 | 63701734 | AC046185  | 0.002    | + | 63701585 | 63701734 | 0 | 1 | 149,        | 0           | -2.69 | -1.75 | 4.2  | -0.606 | -1.72 |
| chr16 | 1510007  | 1510258  | TELO2     | 2.50E-12 | + | 1510007  | 1510258  | 0 | 1 | 251,        | 0           | -11.6 | -10.4 | 4.96 | -0.602 | -1.71 |
| chr5  | 1.32E+08 | 1.32E+08 | IRF1      | 0.0042   | - | 1.32E+08 | 1.32E+08 | 0 | 1 | 101,        | 0           | -2.38 | -2.26 | 2.25 | -0.602 | -1.71 |
| chr6  | 1.51E+08 | 1.51E+08 | AKAP12    | 3.80E-09 | + | 1.51E+08 | 1.51E+08 | 0 | 1 | 151,        | 0           | -8.42 | -7.84 | 1.8  | -0.599 | -1.71 |
| chr3  | 1.73E+08 | 1.73E+08 | NCEH1     | 6.60E-08 | - | 1.73E+08 | 1.73E+08 | 0 | 1 | 596,        | 0           | -7.18 | -6.75 | 8    | -0.601 | -1.71 |
| chr6  | 26597002 | 26597152 | ABT1      | 6.90E-10 | + | 26597002 | 26597152 | 0 | 1 | 150,        | 0           | -9.16 | -8.46 | 1.72 | -0.599 | -1.71 |
| chr3  | 1.28E+08 | 1.28E+08 | GATA2     | 1.90E-07 | - | 1.28E+08 | 1.28E+08 | 0 | 1 | 497,        | 0           | -6.73 | -6.36 | 7.18 | -0.6   | -1.71 |
| chr2  | 96208378 | 96208775 | STARD7    | 1.50E-06 | - | 96208378 | 96208775 | 0 | 1 | 397,        | 0           | -5.82 | -5.53 | 2.62 | -0.598 | -1.7  |
| chr7  | 42937232 | 42937609 | MRPL32    | 3.20E-14 | + | 42937232 | 42937609 | 0 | 2 | 9,288,      | 0,89        | -13.5 | -11.9 | 2.4  | -0.596 | -1.7  |
| chr5  | 34915645 | 34915895 | RAD1      | 6.50E-08 | - | 34915645 | 34915895 | 0 | 1 | 250,        | 0           | -7.19 | -6.76 | 2.54 | -0.598 | -1.7  |
| chr1  | 52055970 | 52056071 | TXNDC12   | 0.00091  | - | 52055970 | 52056071 | 0 | 1 | 101,        | 0           | -3.04 | -2.07 | 3.33 | -0.595 | -1.7  |
| chrX  | 1.04E+08 | 1.04E+08 | TCEAL4    | 3.20E-11 | + | 1.04E+08 | 1.04E+08 | 0 | 1 | 543,        | 0           | -10.5 | -9.57 | 2.31 | -0.595 | -1.7  |
| chr6  | 1.18E+08 | 1.18E+08 | NUS1      | 1.20E-07 | + | 1.18E+08 | 1.18E+08 | 0 | 2 | 44,107,     | 0,907       | -6.92 | -6.52 | 1.61 | -0.598 | -1.7  |
| chr1  | 1.21E+08 | 1.21E+08 | SRGAP2C   | 2.50E-23 | + | 1.21E+08 | 1.21E+08 | 0 | 1 | 101,        | 0           | -22.6 | -20.1 | 8    | -0.599 | -1.7  |
| chr16 | 8782482  | 8782732  | ABAT      | 1.80E-05 | + | 8782482  | 8782732  | 0 | 1 | 250,        | 0           | -4.75 | -3.62 | 3.5  | -0.598 | -1.7  |
| chr7  | 1.31E+08 | 1.31E+08 | KLF14     | 8.30E-07 | - | 1.31E+08 | 1.31E+08 | 0 | 1 | 101,        | 0           | -6.08 | -4.8  | 3    | -0.599 | -1.7  |
| chr4  | 1.23E+08 | 1.23E+08 | FGF2      | 6.90E-07 | + | 1.23E+08 | 1.23E+08 | 0 | 1 | 150,        | 0           | -6.16 | -5.84 | 3.38 | -0.591 | -1.69 |
| chr16 | 87491927 | 87492327 | ZCCHC14   | 0.00091  | - | 87491927 | 87492327 | 0 | 1 | 400,        | 0           | -3.04 | -2.9  | 5    | -0.592 | -1.69 |
| chr1  | 1.81E+08 | 1.81E+08 | XPR1      | 9.80E-08 | + | 1.81E+08 | 1.81E+08 | 0 | 1 | 100,        | 0           | -7.01 | -6.6  | 1.38 | -0.589 | -1.69 |
| chr9  | 14314541 | 14322000 | NFIB      | 1.50E-06 | - | 14314541 | 14322000 | 0 | 2 | 41,60,      | 0,7399      | -5.83 | -5.54 | 2.7  | -0.59  | -1.69 |
| chr3  | 1.41E+08 | 1.41E+08 | ZBTB38    | 1.30E-11 | + | 1.41E+08 | 1.41E+08 | 0 | 1 | 601,        | 0           | -10.9 | -9.85 | 7.6  | -0.593 | -1.69 |
| chr16 | 74999129 | 74999528 | ZNRF1     | 6.90E-06 | + | 74999129 | 74999528 | 0 | 1 | 399,        | 0           | -5.16 | -4.92 | 2.86 | -0.593 | -1.69 |
| chr5  | 470945   | 472223   | AC010442  | 2.50E-08 | - | 470945   | 472223   | 0 | 2 | 1020,117,   | 0,1161      | -7.6  | -7.12 | 5.67 | -0.589 | -1.69 |
| chr14 | 1.06E+08 | 1.06E+08 | IGHV1-24  | 0.00028  | - | 1.06E+08 | 1.06E+08 | 0 | 2 | 123,60,     | 0,208       | -3.55 | -3.39 | 1.17 | -0.592 | -1.69 |
| chr19 | 55540851 | 55541097 | SBK3      | 5.90E-06 | - | 55540851 | 55541097 | 0 | 1 | 246,        | 0           | -5.23 | -4.99 | 6.2  | -0.592 | -1.69 |
| chr6  | 1.36E+08 | 1.36E+08 | BCLAF1    | 1.70E-09 | - | 1.36E+08 | 1.36E+08 | 0 | 3 | 161,147,43, | 0,5712,6845 | -8.78 | -8.14 | 1.88 | -0.586 | -1.68 |
| chr5  | 6599734  | 6603876  | NSUN2     | 2.80E-09 | - | 6599734  | 6603876  | 0 | 3 | 498,40,8,   | 0,2726,4134 | -8.56 | -7.95 | 3.86 | -0.587 | -1.68 |
| chr5  | 470956   | 472203   | SLC9A3    | 1.30E-07 | - | 470956   | 472203   | 0 | 1 | 1247,       | 0           | -6.89 | -6.5  | 6.63 | -0.587 | -1.68 |
| chr19 | 44661763 | 44662214 | PVR       | 1.00E-09 | + | 44661763 | 44662214 | 0 | 1 | 451,        | 0           | -9    | -8.33 | 3.71 | -0.588 | -1.68 |
| chr2  | 25154637 | 25154738 | EFR3B     | 4.70E-05 | + | 25154637 | 25154738 | 0 | 1 | 101,        | 0           | -4.33 | -4.14 | 2.21 | -0.587 | -1.68 |
| chr16 | 29973917 | 29974068 | TAOK2     | 6.50E-08 | + | 29973917 | 29974068 | 0 | 1 | 151,        | 0           | -7.19 | -6.76 | 1.81 | -0.587 | -1.68 |
| chr19 | 29674477 | 29675327 | PLEKHF1   | 2.70E-06 | + | 29674477 | 29675327 | 0 | 1 | 850,        | 0           | -5.57 | -5.3  | 13.5 | -0.586 | -1.68 |
| chr4  | 1.41E+08 | 1.41E+08 | RNF150    | 9.50E-06 | - | 1.41E+08 | 1.41E+08 | 0 | 1 | 200,        | 0           | -5.02 | -3.86 | 2    | -0.587 | -1.68 |
| chr11 | 14891040 | 14891140 | CYP2R1    | 1.70E-06 | - | 14891040 | 14891140 | 0 | 1 | 100,        | 0           | -5.78 | -4.53 | 2.67 | -0.587 | -1.68 |
| chr17 | 45640654 | 45640755 | LINC0221C | 2.50E-06 | + | 45640654 | 45640755 | 0 | 1 | 101,        | 0           | -5.61 | -4.39 | 4    | -0.587 | -1.68 |
| chr9  | 1.26E+08 | 1.26E+08 | AL358074  | 0.0025   | - | 1.26E+08 | 1.26E+08 | 0 | 1 | 148,        | 0           | -2.61 | -1.67 | 5.4  | -0.588 | -1.68 |
| chr14 | 1.02E+08 | 1.02E+08 | AL118558  | 0.0062   | + | 1.02E+08 | 1.02E+08 | 0 | 1 | 687,        | 0           | -2.21 | -2.09 | 10.2 | -0.587 | -1.68 |
| chr6  | 25998005 | 25998353 | U91328.1  | 9.10E-07 | + | 25998005 | 25998353 | 0 | 1 | 348,        | 0           | -6.04 | -4.77 | 3.25 | -0.586 | -1.68 |
| chrX  | 72714118 | 72714269 | PHKA1     | 3.30E-05 | - | 72714118 | 72714269 | 0 | 1 | 151,        | 0           | -4.48 | -4.28 | 1.85 | -0.581 | -1.67 |



|       |          |          |          |          |   |          |          |   |   |              |              |       |       |      |        |       |
|-------|----------|----------|----------|----------|---|----------|----------|---|---|--------------|--------------|-------|-------|------|--------|-------|
| chr8  | 17589508 | 17589607 | PDGFRL   | 0.00035  | + | 17589508 | 17589607 | 0 | 1 | 99,          | 0            | -3.46 | -3.31 | 2.5  | -0.583 | -1.67 |
| chr12 | 6928032  | 6928182  | ATN1     | 2.00E-09 | + | 6928032  | 6928182  | 0 | 1 | 150,         | 0            | -8.69 | -8.06 | 1.41 | -0.583 | -1.67 |
| chr13 | 20142772 | 20143021 | GJA3     | 5.00E-19 | - | 20142772 | 20143021 | 0 | 1 | 249,         | 0            | -18.3 | -15   | 3.6  | -0.583 | -1.67 |
| chr1  | 92393257 | 92394007 | RPAP2    | 3.80E-06 | + | 92393257 | 92394007 | 0 | 1 | 750,         | 0            | -5.42 | -5.16 | 6.37 | -0.581 | -1.67 |
| chr16 | 28925646 | 28936376 | RABEP2   | 0.00036  | - | 28925646 | 28936376 | 0 | 2 | 38,113,      | 0,10617      | -3.44 | -2.43 | 3.75 | -0.584 | -1.67 |
| chr22 | 21610971 | 21621592 | UBE2L3   | 1.10E-07 | + | 21610971 | 21621592 | 0 | 2 | 72,78,       | 0,10543      | -6.96 | -6.55 | 1.98 | -0.583 | -1.67 |
| chr19 | 1392457  | 1392607  | NDUFS7   | 0.00089  | + | 1392457  | 1392607  | 0 | 1 | 150,         | 0            | -3.05 | -2.08 | 2.4  | -0.578 | -1.66 |
| chr12 | 1.24E+08 | 1.24E+08 | CCDC92   | 1.60E-07 | - | 1.24E+08 | 1.24E+08 | 0 | 1 | 449,         | 0            | -6.79 | -6.41 | 6.88 | -0.576 | -1.66 |
| chr16 | 85169674 | 85171072 | GSE1     | 5.40E-07 | + | 85169674 | 85171072 | 0 | 1 | 1398,        | 0            | -6.27 | -5.94 | 7.67 | -0.575 | -1.66 |
| chr12 | 76030544 | 76031093 | PHLDA1   | 3.60E-05 | - | 76030544 | 76031093 | 0 | 1 | 549,         | 0            | -4.44 | -4.25 | 5.5  | -0.574 | -1.66 |
| chr15 | 48149260 | 48149461 | MYEF2    | 1.30E-10 | - | 48149260 | 48149461 | 0 | 1 | 201,         | 0            | -9.89 | -9.04 | 3    | -0.572 | -1.65 |
| chr3  | 32570708 | 32570858 | ZYNC1L1  | 9.80E-08 | - | 32570708 | 32570858 | 0 | 1 | 150,         | 0            | -7.01 | -6.6  | 4.38 | -0.571 | -1.65 |
| chr16 | 31073045 | 31073392 | ZNF668   | 0.00011  | - | 31073045 | 31073392 | 0 | 1 | 347,         | 0            | -3.95 | -3.78 | 8.6  | -0.57  | -1.65 |
| chr10 | 22328603 | 22329836 | BMI1     | 4.00E-11 | + | 22328603 | 22329836 | 0 | 3 | 95,81,624,   | 0,444,609    | -10.4 | -9.47 | 5.35 | -0.571 | -1.65 |
| chr5  | 1.81E+08 | 1.81E+08 | OR2V1    | 0.0035   | - | 1.81E+08 | 1.81E+08 | 0 | 1 | 150,         | 0            | -2.45 | -1.53 | 2    | -0.571 | -1.65 |
| chr16 | 30535295 | 30535395 | AC002310 | 6.00E-04 | + | 30535295 | 30535395 | 0 | 1 | 100,         | 0            | -3.22 | -2.24 | 3.2  | -0.572 | -1.65 |
| chr8  | 26509021 | 26509122 | PNMA2    | 0.0011   | - | 26509021 | 26509122 | 0 | 1 | 101,         | 0            | -2.95 | -1.99 | 3.25 | -0.569 | -1.65 |
| chr16 | 1656003  | 1656802  | CRAMP1   | 9.50E-07 | + | 1656003  | 1656802  | 0 | 1 | 799,         | 0            | -6.02 | -5.71 | 6.73 | -0.565 | -1.64 |
| chrX  | 1.54E+08 | 1.54E+08 | FAM50A   | 4.90E-08 | + | 1.54E+08 | 1.54E+08 | 0 | 3 | 101,77,20,   | 0,2024,2230  | -7.31 | -6.87 | 1.38 | -0.565 | -1.64 |
| chr19 | 8444965  | 8455557  | HNRNPM   | 2.00E-13 | + | 8444965  | 8455557  | 0 | 2 | 146,153,     | 0,10439      | -12.7 | -11.3 | 2.09 | -0.564 | -1.64 |
| chr15 | 44550912 | 44554641 | EIF3J    | 7.60E-09 | + | 44550912 | 44554641 | 0 | 3 | 18,92,89,    | 0,518,3640   | -8.12 | -7.57 | 2.18 | -0.565 | -1.64 |
| chr10 | 1.1E+08  | 1.1E+08  | MXI1     | 0.00017  | + | 1.1E+08  | 1.1E+08  | 0 | 4 | 44,19,24,14, | 0,50,115,147 | -3.77 | -2.74 | 1.4  | -0.566 | -1.64 |
| chrX  | 1.54E+08 | 1.54E+08 | PLXNA3   | 1.30E-06 | + | 1.54E+08 | 1.54E+08 | 0 | 1 | 201,         | 0            | -5.89 | -4.63 | 5    | -0.565 | -1.64 |
| chr12 | 57718186 | 57719205 | OS9      | 1.00E-13 | + | 57718186 | 57719205 | 0 | 2 | 235,213,     | 0,806        | -13   | -11.5 | 2.33 | -0.567 | -1.64 |
| chr9  | 1.13E+08 | 1.13E+08 | KIAA1958 | 2.60E-10 | + | 1.13E+08 | 1.13E+08 | 0 | 1 | 949,         | 0            | -9.59 | -8.79 | 14.7 | -0.565 | -1.64 |
| chr15 | 62838941 | 62840791 | TLN2     | 8.70E-08 | + | 62838941 | 62840791 | 0 | 2 | 40,310,      | 0,1540       | -7.06 | -6.65 | 5.89 | -0.564 | -1.64 |
| chr11 | 1462390  | 1462590  | BRSK2    | 6.80E-05 | + | 1462390  | 1462590  | 0 | 1 | 200,         | 0            | -4.17 | -3.98 | 8.29 | -0.565 | -1.64 |
| chr22 | 50720347 | 50720597 | SHANK3   | 1.60E-06 | + | 50720347 | 50720597 | 0 | 1 | 250,         | 0            | -5.8  | -5.51 | 3.08 | -0.566 | -1.64 |
| chr19 | 56567312 | 56567411 | AC005498 | 2.80E-09 | - | 56567312 | 56567411 | 0 | 1 | 99,          | 0            | -8.55 | -7.94 | 7    | -0.565 | -1.64 |
| chr7  | 81769984 | 81770135 | HGF      | 0.0029   | - | 81769984 | 81770135 | 0 | 1 | 151,         | 0            | -2.54 | -2.42 | 1.27 | -0.559 | -1.63 |
| chr16 | 48352274 | 48352723 | LONP2    | 7.80E-06 | + | 48352274 | 48352723 | 0 | 1 | 449,         | 0            | -5.11 | -4.88 | 5.62 | -0.563 | -1.63 |
| chr9  | 22008904 | 22009155 | CDKN2B   | 5.00E-12 | - | 22008904 | 22009155 | 0 | 1 | 251,         | 0            | -11.3 | -10.2 | 2.5  | -0.56  | -1.63 |
| chr6  | 1.55E+08 | 1.55E+08 | CNKSR3   | 3.20E-09 | - | 1.55E+08 | 1.55E+08 | 0 | 1 | 250,         | 0            | -8.5  | -7.91 | 3.25 | -0.559 | -1.63 |
| chr11 | 76386342 | 76386542 | GVQW3    | 7.60E-06 | + | 76386342 | 76386542 | 0 | 1 | 200,         | 0            | -5.12 | -3.95 | 2.25 | -0.559 | -1.63 |
| chr13 | 96091037 | 96091137 | HS6ST3   | 2.50E-06 | + | 96091037 | 96091137 | 0 | 1 | 100,         | 0            | -5.6  | -4.38 | 2.5  | -0.561 | -1.63 |
| chr1  | 1.51E+08 | 1.51E+08 | CDC42SE1 | 2.90E-07 | - | 1.51E+08 | 1.51E+08 | 0 | 2 | 465,84,      | 0,1368       | -6.54 | -6.19 | 6.2  | -0.559 | -1.63 |
| chr19 | 48469349 | 48469448 | AC008403 | 3.80E-07 | - | 48469349 | 48469448 | 0 | 1 | 99,          | 0            | -6.42 | -6.08 | 1.6  | -0.559 | -1.63 |
| chr19 | 13906252 | 13906352 | C19orf57 | 3.30E-06 | - | 13906252 | 13906352 | 0 | 1 | 100,         | 0            | -5.48 | -5.21 | 1.16 | -0.555 | -1.62 |
| chr2  | 43226405 | 43226556 | ZFP36L2  | 7.90E-13 | - | 43226405 | 43226556 | 0 | 1 | 151,         | 0            | -12.1 | -10.8 | 1.68 | -0.558 | -1.62 |
| chr15 | 66323584 | 66326279 | DIS3L    | 4.00E-11 | + | 66323584 | 66326279 | 0 | 2 | 1,449,       | 0,2246       | -10.4 | -9.48 | 5.84 | -0.557 | -1.62 |
| chr7  | 5388332  | 5389331  | TNRC18   | 5.90E-08 | - | 5388332  | 5389331  | 0 | 1 | 999,         | 0            | -7.23 | -6.79 | 7.62 | -0.557 | -1.62 |
| chr19 | 1392466  | 1392616  | AC005329 | 0.00041  | - | 1392466  | 1392616  | 0 | 1 | 150,         | 0            | -3.39 | -2.39 | 2    | -0.557 | -1.62 |
| chr12 | 53994104 | 53994499 | HOXC-AS1 | 0.00015  | - | 53994104 | 53994499 | 0 | 1 | 395,         | 0            | -3.83 | -3.67 | 3.79 | -0.558 | -1.62 |
| chr17 | 79802062 | 79802249 | AC100791 | 3.90E-05 | + | 79802062 | 79802249 | 0 | 1 | 187,         | 0            | -4.41 | -3.32 | 2.75 | -0.554 | -1.62 |
| chr2  | 2.18E+08 | 2.18E+08 | TNS1     | 3.50E-06 | - | 2.18E+08 | 2.18E+08 | 0 | 1 | 201,         | 0            | -5.45 | -5.19 | 6.67 | -0.548 | -1.61 |
| chr1  | 2.28E+08 | 2.28E+08 | JMJD4    | 0.00017  | - | 2.28E+08 | 2.28E+08 | 0 | 1 | 150,         | 0            | -3.78 | -3.62 | 2.9  | -0.551 | -1.61 |
| chr20 | 62879235 | 62881133 | DIDO1    | 3.00E-09 | - | 62879235 | 62881133 | 0 | 1 | 1898,        | 0            | -8.53 | -7.93 | 8.67 | -0.553 | -1.61 |
| chr15 | 63042930 | 63043430 | TPM1     | 1.70E-08 | + | 63042930 | 63043430 | 0 | 1 | 500,         | 0            | -7.77 | -7.27 | 2.69 | -0.549 | -1.61 |
| chr19 | 41350960 | 41351060 | TMEM91   | 0.0021   | + | 41350960 | 41351060 | 0 | 1 | 100,         | 0            | -2.68 | -1.74 | 3    | -0.549 | -1.61 |
| chr18 | 50283052 | 50283251 | CXXC1    | 0.00023  | - | 50283052 | 50283251 | 0 | 1 | 199,         | 0            | -3.64 | -2.62 | 4.67 | -0.549 | -1.61 |
| chr2  | 2.06E+08 | 2.06E+08 | AC007383 | 4.30E-07 | + | 2.06E+08 | 2.06E+08 | 0 | 1 | 493,         | 0            | -6.37 | -6.03 | 7.29 | -0.553 | -1.61 |

|       |          |          |           |          |   |          |          |   |   |             |             |       |       |      |        |       |
|-------|----------|----------|-----------|----------|---|----------|----------|---|---|-------------|-------------|-------|-------|------|--------|-------|
| chr20 | 63628399 | 63628683 | MHENC     | 3.20E-09 | + | 63628399 | 63628683 | 0 | 1 | 284,        | 0           | -8.5  | -7.9  | 3.43 | -0.549 | -1.61 |
| chrX  | 1.37E+08 | 1.37E+08 | AL390879. | 1.50E-05 | + | 1.37E+08 | 1.37E+08 | 0 | 1 | 200,        | 0           | -4.82 | -3.68 | 3.75 | -0.549 | -1.61 |
| chr18 | 11851444 | 11852282 | CHMP1B    | 5.00E-12 | + | 11851444 | 11852282 | 0 | 1 | 838,        | 0           | -11.3 | -10.1 | 5.92 | -0.553 | -1.61 |
| chr16 | 89918578 | 89919378 | MC1R      | 2.20E-06 | + | 89918578 | 89919378 | 0 | 1 | 800,        | 0           | -5.66 | -5.38 | 7.82 | -0.553 | -1.61 |
| chr3  | 1.3E+08  | 1.3E+08  | TMCC1-A   | 2.30E-05 | + | 1.3E+08  | 1.3E+08  | 0 | 1 | 299,        | 0           | -4.63 | -4.42 | 4.44 | -0.55  | -1.61 |
| chr19 | 45408243 | 45409678 | CD3EAP    | 3.20E-11 | + | 45408243 | 45409678 | 0 | 1 | 1435,       | 0           | -10.5 | -9.52 | 7.62 | -0.543 | -1.6  |
| chrX  | 69505686 | 69505984 | FAM155B   | 1.50E-07 | + | 69505686 | 69505984 | 0 | 1 | 298,        | 0           | -6.82 | -6.43 | 11   | -0.543 | -1.6  |
| chr1  | 90020907 | 90027742 | ZNF326    | 2.10E-10 | + | 90020907 | 90027742 | 0 | 3 | 15,96,389,  | 0,1342,6446 | -9.68 | -8.87 | 3.09 | -0.547 | -1.6  |
| chrM  | 7780     | 7976     | MT-CO2    | 3.80E-07 | + | 7780     | 7976     | 0 | 1 | 196,        | 0           | -6.42 | -6.07 | 1.11 | -0.543 | -1.6  |
| chr10 | 1.11E+08 | 1.11E+08 | RBM20     | 6.80E-05 | + | 1.11E+08 | 1.11E+08 | 0 | 1 | 101,        | 0           | -4.17 | -3.1  | 4.25 | -0.547 | -1.6  |
| chr22 | 22712971 | 22713111 | IGLV3-21  | 2.00E-11 | + | 22712971 | 22713111 | 0 | 1 | 140,        | 0           | -10.7 | -9.69 | 1.43 | -0.547 | -1.6  |
| chrX  | 1.01E+08 | 1.01E+08 | RPL36A-H  | 5.40E-09 | + | 1.01E+08 | 1.01E+08 | 0 | 1 | 249,        | 0           | -8.27 | -7.71 | 3.56 | -0.546 | -1.6  |
| chr20 | 311827   | 312802   | AL034548. | 0.00098  | + | 311827   | 312802   | 0 | 2 | 28,69,      | 0,906       | -3.01 | -2.04 | 3.4  | -0.543 | -1.6  |
| chr12 | 54009674 | 54011586 | HOXC8     | 7.90E-08 | + | 54009674 | 54011586 | 0 | 2 | 46,498,     | 0,1414      | -7.1  | -6.68 | 4.5  | -0.541 | -1.59 |
| chr19 | 17323618 | 17323867 | ANO8      | 1.20E-05 | - | 17323618 | 17323867 | 0 | 1 | 249,        | 0           | -4.93 | -4.71 | 2.12 | -0.542 | -1.59 |
| chr14 | 35404550 | 35404749 | NFKBIA    | 1.30E-07 | - | 35404550 | 35404749 | 0 | 1 | 199,        | 0           | -6.89 | -6.49 | 1.27 | -0.542 | -1.59 |
| chr2  | 1.89E+08 | 1.89E+08 | WDR75     | 7.90E-05 | + | 1.89E+08 | 1.89E+08 | 0 | 1 | 150,        | 0           | -4.1  | -3.93 | 3.31 | -0.543 | -1.59 |
| chr1  | 25617617 | 25617717 | MAN1C1    | 0.00021  | + | 25617617 | 25617717 | 0 | 1 | 100,        | 0           | -3.68 | -2.66 | 3.6  | -0.541 | -1.59 |
| chr3  | 17009712 | 17010110 | PLCL2     | 9.30E-05 | + | 17009712 | 17010110 | 0 | 1 | 398,        | 0           | -4.03 | -2.97 | 4.5  | -0.541 | -1.59 |
| chr17 | 44353813 | 44354362 | FAM171A2  | 7.10E-06 | - | 44353813 | 44354362 | 0 | 1 | 549,        | 0           | -5.15 | -4.91 | 11.3 | -0.543 | -1.59 |
| chr2  | 2.16E+08 | 2.16E+08 | TMEM169   | 8.30E-08 | + | 2.16E+08 | 2.16E+08 | 0 | 1 | 200,        | 0           | -7.08 | -6.66 | 8.25 | -0.541 | -1.59 |
| chr4  | 1.28E+08 | 1.28E+08 | HSPA4L    | 9.50E-10 | + | 1.28E+08 | 1.28E+08 | 0 | 2 | 91,159,     | 0,1974      | -9.02 | -8.34 | 3    | -0.541 | -1.59 |
| chr16 | 11837526 | 11841422 | RSL1D1    | 2.00E-13 | - | 11837526 | 11841422 | 0 | 3 | 587,291,17, | 0,2168,3879 | -12.7 | -11.2 | 4.94 | -0.541 | -1.59 |
| chr19 | 2859371  | 2859472  | ZNF555    | 0.036    | + | 2859371  | 2859472  | 0 | 1 | 101,        | 0           | -1.44 | -1.33 | 13.2 | -0.541 | -1.59 |
| chr7  | 83155229 | 83155380 | PCLO      | 0.00012  | - | 83155229 | 83155380 | 0 | 1 | 151,        | 0           | -3.92 | -2.87 | 3    | -0.541 | -1.59 |
| chr12 | 3040224  | 3040676  | TEAD4     | 1.30E-19 | + | 3040224  | 3040676  | 0 | 2 | 35,312,     | 0,140       | -18.9 | -16.5 | 4.56 | -0.542 | -1.59 |
| chr20 | 36526033 | 36527825 | DLGAP4-A  | 2.70E-07 | - | 36526033 | 36527825 | 0 | 2 | 97,102,     | 0,1690      | -6.57 | -6.21 | 2.67 | -0.541 | -1.59 |
| chr11 | 58611658 | 58611807 | AP001350. | 3.20E-13 | - | 58611658 | 58611807 | 0 | 1 | 149,        | 0           | -12.5 | -11.1 | 1.79 | -0.541 | -1.59 |
| chr14 | 1.07E+08 | 1.07E+08 | IGHV1-69I | 5.00E-13 | - | 1.07E+08 | 1.07E+08 | 0 | 1 | 92,         | 0           | -12.3 | -10.9 | 1.23 | -0.541 | -1.59 |
| chr2  | 20201736 | 20201886 | SDC1      | 5.50E-05 | - | 20201736 | 20201886 | 0 | 1 | 150,        | 0           | -4.26 | -4.07 | 3    | -0.534 | -1.58 |
| chr10 | 99329405 | 99329604 | CNNM1     | 0.00089  | + | 99329405 | 99329604 | 0 | 1 | 199,        | 0           | -3.05 | -2.08 | 2.71 | -0.535 | -1.58 |
| chr2  | 1.09E+08 | 1.09E+08 | RANBP2    | 7.20E-06 | + | 1.09E+08 | 1.09E+08 | 0 | 1 | 151,        | 0           | -5.14 | -4.9  | 2.54 | -0.535 | -1.58 |
| chr19 | 51689374 | 51689573 | SPACA6    | 3.40E-05 | + | 51689374 | 51689573 | 0 | 1 | 199,        | 0           | -4.47 | -4.27 | 1.94 | -0.535 | -1.58 |
| chr12 | 6493604  | 6494053  | NCAPD2    | 2.30E-05 | + | 6493604  | 6494053  | 0 | 1 | 449,        | 0           | -4.64 | -4.43 | 4.79 | -0.533 | -1.57 |
| chr5  | 1.14E+08 | 1.14E+08 | KCNN2     | 0.0058   | + | 1.14E+08 | 1.14E+08 | 0 | 2 | 36,65,      | 0,849       | -2.24 | -1.33 | 2.17 | -0.533 | -1.57 |
| chr10 | 67884953 | 67885102 | SIRT1     | 1.90E-10 | + | 67884953 | 67885102 | 0 | 1 | 149,        | 0           | -9.71 | -8.9  | 2.11 | -0.531 | -1.57 |
| chr13 | 77000505 | 77000706 | CLN5      | 2.60E-07 | + | 77000505 | 77000706 | 0 | 1 | 201,        | 0           | -6.58 | -6.22 | 7.5  | -0.533 | -1.57 |
| chr1  | 1.56E+08 | 1.56E+08 | ARHGEF2   | 1.00E-04 | - | 1.56E+08 | 1.56E+08 | 0 | 2 | 270,80,     | 0,2523      | -3.98 | -3.81 | 3.86 | -0.533 | -1.57 |
| chr19 | 1205854  | 1207200  | STK11     | 1.60E-11 | + | 1205854  | 1207200  | 0 | 2 | 235,1015,   | 0,331       | -10.8 | -9.77 | 6.18 | -0.531 | -1.57 |
| chr12 | 57738111 | 57739745 | TSPAN31   | 0.00026  | + | 57738111 | 57739745 | 0 | 2 | 90,10,      | 0,1624      | -3.58 | -2.56 | 2.6  | -0.533 | -1.57 |
| chr17 | 79993604 | 80010429 | TBC1D16   | 0.0022   | - | 79993604 | 80010429 | 0 | 2 | 30,270,     | 0,16555     | -2.65 | -2.52 | 8.57 | -0.533 | -1.57 |
| chr4  | 3767387  | 3767487  | ADRA2C    | 0.00063  | + | 3767387  | 3767487  | 0 | 1 | 100,        | 0           | -3.2  | -3.05 | 3.63 | -0.533 | -1.57 |
| chr3  | 1.98E+08 | 1.98E+08 | LMLN      | 9.30E-06 | + | 1.98E+08 | 1.98E+08 | 0 | 1 | 150,        | 0           | -5.03 | -3.87 | 3.25 | -0.533 | -1.57 |
| chr9  | 1.37E+08 | 1.37E+08 | RABL6     | 0.00026  | + | 1.37E+08 | 1.37E+08 | 0 | 1 | 250,        | 0           | -3.58 | -3.42 | 4.43 | -0.532 | -1.57 |
| chr12 | 85805173 | 85805373 | RASSF9    | 7.60E-07 | - | 85805173 | 85805373 | 0 | 1 | 200,        | 0           | -6.12 | -4.83 | 6.2  | -0.533 | -1.57 |
| chr19 | 55654294 | 55654790 | U2AF2     | 3.80E-09 | + | 55654294 | 55654790 | 0 | 1 | 496,        | 0           | -8.42 | -7.84 | 4.29 | -0.529 | -1.56 |
| chr17 | 46949240 | 46949341 | GOSR2     | 0.00019  | + | 46949240 | 46949341 | 0 | 1 | 101,        | 0           | -3.71 | -2.68 | 1.86 | -0.528 | -1.56 |
| chr2  | 2.31E+08 | 2.31E+08 | NCL       | 9.80E-10 | - | 2.31E+08 | 2.31E+08 | 0 | 2 | 144,6,      | 0,277       | -9.01 | -8.33 | 1.81 | -0.53  | -1.56 |
| chr6  | 1.25E+08 | 1.25E+08 | RNF217    | 2.80E-10 | + | 1.25E+08 | 1.25E+08 | 0 | 1 | 600,        | 0           | -9.55 | -8.77 | 9.42 | -0.527 | -1.56 |
| chr1  | 1.61E+08 | 1.61E+08 | TOMM40L   | 5.00E-10 | + | 1.61E+08 | 1.61E+08 | 0 | 1 | 449,        | 0           | -9.3  | -8.57 | 5.55 | -0.527 | -1.56 |
| chr18 | 8718451  | 8718551  | MTCL1     | 0.00081  | + | 8718451  | 8718551  | 0 | 1 | 100,        | 0           | -3.09 | -2.95 | 1.94 | -0.528 | -1.56 |

|       |          |          |           |          |   |          |          |   |   |           |             |       |       |      |        |       |
|-------|----------|----------|-----------|----------|---|----------|----------|---|---|-----------|-------------|-------|-------|------|--------|-------|
| chr17 | 81511498 | 81511697 | ACTG1     | 1.20E-06 | - | 81511498 | 81511697 | 0 | 1 | 199,      | 0           | -5.93 | -5.62 | 1.29 | -0.53  | -1.56 |
| chr7  | 1E+08    | 1E+08    | GAL3ST4   | 0.003    | - | 1E+08    | 1E+08    | 0 | 1 | 100,      | 0           | -2.52 | -1.59 | 5    | -0.53  | -1.56 |
| chr7  | 1.49E+08 | 1.49E+08 | ZNF425    | 0.00011  | - | 1.49E+08 | 1.49E+08 | 0 | 1 | 348,      | 0           | -3.95 | -2.9  | 6    | -0.529 | -1.56 |
| chr21 | 46244856 | 46245206 | MCM3AP-   | 1.30E-07 | + | 46244856 | 46245206 | 0 | 1 | 350,      | 0           | -6.87 | -6.48 | 4    | -0.53  | -1.56 |
| chr12 | 11171471 | 11172321 | SMIM10L1  | 2.10E-10 | + | 11171471 | 11172321 | 0 | 1 | 850,      | 0           | -9.68 | -8.87 | 7.93 | -0.528 | -1.56 |
| chr5  | 435552   | 435802   | AHRR      | 0.0054   | + | 435552   | 435802   | 0 | 1 | 250,      | 0           | -2.27 | -1.36 | 5.4  | -0.529 | -1.56 |
| chr9  | 88387881 | 88389224 | AL353748. | 3.20E-16 | - | 88387881 | 88389224 | 0 | 2 | 236,113,  | 0,1230      | -15.5 | -12.5 | 3    | -0.527 | -1.56 |
| chr13 | 77000526 | 77000726 | FBXL3     | 8.10E-09 | - | 77000526 | 77000726 | 0 | 1 | 200,      | 0           | -8.09 | -7.54 | 6.1  | -0.525 | -1.55 |
| chr20 | 25476131 | 25476829 | NINL      | 4.30E-05 | - | 25476131 | 25476829 | 0 | 1 | 698,      | 0           | -4.37 | -4.17 | 7.89 | -0.524 | -1.55 |
| chr20 | 36612071 | 36612218 | RAB5IF    | 6.00E-05 | + | 36612071 | 36612218 | 0 | 1 | 147,      | 0           | -4.22 | -4.04 | 1.91 | -0.522 | -1.55 |
| chr1  | 8013958  | 8014308  | ERRFI1    | 1.00E-04 | - | 8013958  | 8014308  | 0 | 1 | 350,      | 0           | -3.99 | -3.82 | 3.67 | -0.524 | -1.55 |
| chr7  | 12688319 | 12688818 | ARL4A     | 1.20E-06 | + | 12688319 | 12688818 | 0 | 1 | 499,      | 0           | -5.92 | -5.62 | 5.95 | -0.525 | -1.55 |
| chr4  | 2255049  | 2255150  | MXD4      | 0.00018  | - | 2255049  | 2255150  | 0 | 1 | 101,      | 0           | -3.75 | -2.72 | 1.6  | -0.524 | -1.55 |
| chr15 | 98958084 | 98958434 | IGF1R     | 9.80E-08 | + | 98958084 | 98958434 | 0 | 1 | 350,      | 0           | -7.01 | -6.6  | 2.36 | -0.523 | -1.55 |
| chr19 | 19545915 | 19546065 | CILP2     | 0.00031  | + | 19545915 | 19546065 | 0 | 1 | 150,      | 0           | -3.51 | -2.5  | 8.5  | -0.521 | -1.55 |
| chr17 | 81672908 | 81673506 | CCDC137   | 3.10E-05 | + | 81672908 | 81673506 | 0 | 1 | 598,      | 0           | -4.51 | -4.31 | 5.05 | -0.525 | -1.55 |
| chr5  | 80558934 | 80559530 | ANKRD34E  | 1.80E-06 | - | 80558934 | 80559530 | 0 | 1 | 596,      | 0           | -5.75 | -4.51 | 5.75 | -0.525 | -1.55 |
| chrX  | 21882524 | 21882625 | MBTPS2    | 8.30E-06 | + | 21882524 | 21882625 | 0 | 1 | 101,      | 0           | -5.08 | -4.84 | 4    | -0.518 | -1.54 |
| chr5  | 55308038 | 55308139 | MTREX     | 6.80E-09 | + | 55308038 | 55308139 | 0 | 1 | 101,      | 0           | -8.17 | -7.62 | 1.3  | -0.519 | -1.54 |
| chr16 | 30979951 | 30980200 | SETD1A    | 1.30E-07 | + | 30979951 | 30980200 | 0 | 1 | 249,      | 0           | -6.88 | -6.49 | 6    | -0.518 | -1.54 |
| chr2  | 73385907 | 73386158 | ALMS1     | 6.50E-06 | + | 73385907 | 73386158 | 0 | 1 | 251,      | 0           | -5.19 | -4.94 | 2.24 | -0.518 | -1.54 |
| chr2  | 69895180 | 69897379 | SNRNP27   | 4.00E-11 | + | 69895180 | 69897379 | 0 | 3 | 34,113,3, | 0,1255,2196 | -10.4 | -9.48 | 1.25 | -0.518 | -1.54 |
| chr2  | 71132930 | 71133525 | MPHOSPH   | 1.20E-08 | + | 71132930 | 71133525 | 0 | 1 | 595,      | 0           | -7.93 | -7.41 | 6.18 | -0.518 | -1.54 |
| chr22 | 41925117 | 41925517 | TNFRSF13C | 0.00017  | - | 41925117 | 41925517 | 0 | 1 | 400,      | 0           | -3.76 | -3.6  | 6.17 | -0.516 | -1.54 |
| chr5  | 1.51E+08 | 1.51E+08 | SYNPO     | 0.001    | + | 1.51E+08 | 1.51E+08 | 0 | 1 | 151,      | 0           | -3    | -2.03 | 2    | -0.52  | -1.54 |
| chr4  | 6716201  | 6717279  | BLOC1S4   | 3.20E-11 | + | 6716201  | 6717279  | 0 | 1 | 1078,     | 0           | -10.5 | -9.54 | 8.2  | -0.52  | -1.54 |
| chr7  | 74657697 | 74657798 | GTF2I     | 5.60E-06 | + | 74657697 | 74657798 | 0 | 1 | 101,      | 0           | -5.25 | -5.01 | 1.56 | -0.518 | -1.54 |
| chr9  | 1.37E+08 | 1.37E+08 | AL355987. | 0.003    | + | 1.37E+08 | 1.37E+08 | 0 | 3 | 94,55,2,  | 0,228,1544  | -2.53 | -1.6  | 1.78 | -0.518 | -1.54 |
| chr6  | 3983886  | 3984081  | AL138831. | 2.50E-15 | + | 3983886  | 3984081  | 0 | 1 | 195,      | 0           | -14.6 | -11.7 | 2.4  | -0.519 | -1.54 |
| chr19 | 17320352 | 17320603 | DDA1      | 3.00E-07 | + | 17320352 | 17320603 | 0 | 1 | 251,      | 0           | -6.52 | -5.19 | 4.5  | -0.508 | -1.53 |
| chr12 | 1.04E+08 | 1.04E+08 | HSP90B1   | 1.60E-13 | + | 1.04E+08 | 1.04E+08 | 0 | 2 | 158,142,  | 0,1114      | -12.8 | -11.3 | 1.4  | -0.513 | -1.53 |
| chr15 | 43531169 | 43531320 | MAP1A     | 2.60E-05 | + | 43531169 | 43531320 | 0 | 1 | 151,      | 0           | -4.59 | -4.38 | 4.14 | -0.515 | -1.53 |
| chr9  | 1.27E+08 | 1.27E+08 | MVB12B    | 3.80E-08 | + | 1.27E+08 | 1.27E+08 | 0 | 1 | 349,      | 0           | -7.42 | -5.96 | 5    | -0.511 | -1.53 |
| chr19 | 40826671 | 40826772 | CYP2F2P   | 1.10E-09 | - | 40826671 | 40826772 | 0 | 1 | 101,      | 0           | -8.94 | -7.24 | 2    | -0.512 | -1.53 |
| chr18 | 35283753 | 35283954 | ACO11815  | 5.00E-05 | - | 35283753 | 35283954 | 0 | 1 | 201,      | 0           | -4.3  | -3.21 | 3.11 | -0.508 | -1.53 |
| chr12 | 95300208 | 95300807 | VEZT      | 1.00E-13 | + | 95300208 | 95300807 | 0 | 1 | 599,      | 0           | -13   | -11.4 | 5.8  | -0.507 | -1.52 |
| chr16 | 89719055 | 89720798 | VPS9D1    | 0.00079  | - | 89719055 | 89720798 | 0 | 2 | 314,36,   | 0,1707      | -3.1  | -2.97 | 5.14 | -0.504 | -1.52 |
| chr17 | 7587959  | 7588159  | MPDU1     | 2.00E-05 | + | 7587959  | 7588159  | 0 | 1 | 200,      | 0           | -4.69 | -4.48 | 1.38 | -0.508 | -1.52 |
| chr2  | 2.03E+08 | 2.03E+08 | CARF      | 1.50E-05 | + | 2.03E+08 | 2.03E+08 | 0 | 2 | 25,176,   | 0,1089      | -4.83 | -4.61 | 6.5  | -0.505 | -1.52 |
| chr11 | 46379854 | 46380254 | DGKZ      | 2.70E-07 | + | 46379854 | 46380254 | 0 | 1 | 400,      | 0           | -6.57 | -6.21 | 7.6  | -0.505 | -1.52 |
| chr1  | 1.55E+08 | 1.55E+08 | MUC1      | 8.70E-05 | - | 1.55E+08 | 1.55E+08 | 0 | 1 | 101,      | 0           | -4.06 | -3.88 | 3.25 | -0.506 | -1.52 |
| chrX  | 73850825 | 73851425 | XIST      | 1.10E-10 | - | 73850825 | 73851425 | 0 | 1 | 600,      | 0           | -9.96 | -9.1  | 5.32 | -0.508 | -1.52 |
| chr5  | 36875766 | 36876410 | NIPBL-DT  | 5.50E-10 | - | 36875766 | 36876410 | 0 | 1 | 644,      | 0           | -9.26 | -8.54 | 7.38 | -0.505 | -1.52 |
| chr20 | 1181135  | 1181236  | PSMF1     | 1.00E-05 | + | 1181135  | 1181236  | 0 | 1 | 101,      | 0           | -4.98 | -3.83 | 3    | -0.502 | -1.51 |
| chr12 | 1.1E+08  | 1.1E+08  | FAM222A   | 1.20E-05 | + | 1.1E+08  | 1.1E+08  | 0 | 1 | 696,      | 0           | -4.91 | -3.77 | 10   | -0.499 | -1.51 |
| chr7  | 1.43E+08 | 1.43E+08 | TMEM139   | 3.50E-05 | + | 1.43E+08 | 1.43E+08 | 0 | 1 | 198,      | 0           | -4.45 | -3.35 | 3.4  | -0.499 | -1.51 |
| chr17 | 42682473 | 42682771 | CCR10     | 2.80E-07 | - | 42682473 | 42682771 | 0 | 1 | 298,      | 0           | -6.56 | -6.2  | 2.65 | -0.499 | -1.51 |
| chr15 | 32636315 | 32637409 | ARHGAP1.  | 7.90E-12 | + | 32636315 | 32637409 | 0 | 1 | 1094,     | 0           | -11.1 | -9.99 | 9.3  | -0.502 | -1.51 |
| chr22 | 28000432 | 28000683 | TTC28-AS. | 0.00028  | + | 28000432 | 28000683 | 0 | 1 | 251,      | 0           | -3.55 | -3.39 | 7.43 | -0.502 | -1.51 |
| chr19 | 57507509 | 57513023 | ZNF773    | 1.10E-10 | + | 57507509 | 57513023 | 0 | 3 | 652,45,2, | 0,1010,5512 | -9.95 | -9.09 | 5.75 | -0.493 | -1.5  |
| chr3  | 40467290 | 40467390 | RPL14     | 1.20E-05 | + | 40467290 | 40467390 | 0 | 1 | 100,      | 0           | -4.91 | -3.77 | 4.29 | -0.496 | -1.5  |

|       |          |          |           |          |   |          |          |   |   |                           |             |       |       |      |        |       |
|-------|----------|----------|-----------|----------|---|----------|----------|---|---|---------------------------|-------------|-------|-------|------|--------|-------|
| chr15 | 82434452 | 82434553 | GOLGA6L   | 1.00E-12 | + | 82434452 | 82434553 | 0 | 1 | 101,                      | 0           | -12   | -10.7 | 2.57 | -0.495 | -1.5  |
| chr20 | 36609718 | 36612239 | TGIF2-RAE | 1.50E-06 | + | 36609718 | 36612239 | 0 | 2 | 12,230,                   | 0,2291      | -5.81 | -5.51 | 2.13 | -0.496 | -1.5  |
| chr17 | 32041227 | 32041376 | SH3GL1P1  | 0.00015  | + | 32041227 | 32041376 | 0 | 1 | 149,                      | 0           | -3.81 | -2.77 | 2    | -0.495 | -1.5  |
| chr11 | 72813903 | 72814004 | AP002381. | 0.00049  | - | 72813903 | 72814004 | 0 | 1 | 101,                      | 0           | -3.31 | -2.31 | 1.75 | -0.495 | -1.5  |
| chr19 | 45408228 | 45409673 | ERCC1     | 6.30E-13 | - | 45408228 | 45409673 | 0 | 1 | 1445,                     | 0           | -12.2 | -10.9 | 8    | -0.491 | -1.49 |
| chr17 | 50743751 | 50749224 | LUC7L3    | 1.40E-07 | + | 50743751 | 50749224 | 0 | 6 | 59,162,284,10,900,1968,27 | 0           | -6.85 | -6.46 | 1.55 | -0.49  | -1.49 |
| chr6  | 10529089 | 10529289 | GCNT2     | 5.00E-07 | + | 10529089 | 10529289 | 0 | 1 | 200,                      | 0           | -6.3  | -4.99 | 2.89 | -0.487 | -1.49 |
| chr11 | 5678268  | 5679155  | TRIM5     | 1.90E-08 | - | 5678268  | 5679155  | 0 | 2 | 166.82,                   | 0,805       | -7.72 | -7.22 | 2.03 | -0.491 | -1.49 |
| chr5  | 77076753 | 77077650 | ZBED3     | 1.70E-10 | - | 77076753 | 77077650 | 0 | 1 | 897,                      | 0           | -9.77 | -8.95 | 14   | -0.491 | -1.49 |
| chr12 | 1.23E+08 | 1.23E+08 | DENR      | 2.10E-06 | + | 1.23E+08 | 1.23E+08 | 0 | 2 | 46.54,                    | 0,2146      | -5.67 | -5.39 | 1.96 | -0.491 | -1.49 |
| chr1  | 1.51E+08 | 1.51E+08 | ENSA      | 1.00E-08 | - | 1.51E+08 | 1.51E+08 | 0 | 3 | 272,48,30,                | 0,942,1517  | -7.98 | -7.46 | 2.3  | -0.491 | -1.49 |
| chr15 | 42719798 | 42719999 | STARD9    | 1.10E-05 | + | 42719798 | 42719999 | 0 | 1 | 201,                      | 0           | -4.95 | -4.72 | 5.8  | -0.488 | -1.49 |
| chr22 | 41923719 | 41923870 | TNFRSF13  | 0.00024  | - | 41923719 | 41923870 | 0 | 1 | 151,                      | 0           | -3.62 | -2.6  | 3.33 | -0.49  | -1.49 |
| chr2  | 2.16E+08 | 2.16E+08 | TMEM169   | 4.40E-05 | + | 2.16E+08 | 2.16E+08 | 0 | 1 | 101,                      | 0           | -4.36 | -3.27 | 1.83 | -0.49  | -1.49 |
| chr19 | 49877120 | 49877420 | AKT1S1    | 2.60E-07 | - | 49877120 | 49877420 | 0 | 1 | 300,                      | 0           | -6.59 | -6.23 | 4.61 | -0.488 | -1.49 |
| chr18 | 2652870  | 2653259  | AP005061. | 2.50E-07 | - | 2652870  | 2653259  | 0 | 1 | 389,                      | 0           | -6.61 | -5.27 | 6.8  | -0.491 | -1.49 |
| chr19 | 2353501  | 2353850  | SPPL2B    | 1.40E-07 | + | 2353501  | 2353850  | 0 | 1 | 349,                      | 0           | -6.85 | -6.46 | 5.38 | -0.483 | -1.48 |
| chr7  | 1.49E+08 | 1.49E+08 | CUL1      | 1.30E-10 | + | 1.49E+08 | 1.49E+08 | 0 | 3 | 19,114,411,               | 0,616,1843  | -9.88 | -9.03 | 5.65 | -0.483 | -1.48 |
| chr10 | 68766048 | 68786199 | GCAR1     | 4.00E-10 | + | 68766048 | 68786199 | 0 | 4 | 31,240,112,60,5157,6939,2 | 0           | -9.4  | -8.65 | 2.42 | -0.482 | -1.48 |
| chr19 | 1261298  | 1261876  | CIRBP     | 0.00079  | + | 1261298  | 1261876  | 0 | 2 | 343,56,                   | 0,522       | -3.1  | -2.96 | 5.55 | -0.483 | -1.48 |
| chr4  | 1.41E+08 | 1.41E+08 | TBC1D9    | 2.30E-06 | - | 1.41E+08 | 1.41E+08 | 0 | 1 | 100,                      | 0           | -5.63 | -4.4  | 1.67 | -0.484 | -1.48 |
| chr1  | 54225213 | 54225364 | MRPL37    | 0.0024   | + | 54225213 | 54225364 | 0 | 1 | 151,                      | 0           | -2.62 | -1.69 | 5.5  | -0.484 | -1.48 |
| chr1  | 36156207 | 36157257 | MAP7D1    | 2.50E-09 | + | 36156207 | 36157257 | 0 | 2 | 256,43,                   | 0,1007      | -8.61 | -8    | 1.83 | -0.483 | -1.48 |
| chr3  | 29924877 | 29925078 | RBMS3     | 2.60E-09 | + | 29924877 | 29925078 | 0 | 1 | 201,                      | 0           | -8.58 | -7.96 | 3.83 | -0.483 | -1.48 |
| chr10 | 1.03E+08 | 1.03E+08 | CNNM2     | 3.00E-09 | + | 1.03E+08 | 1.03E+08 | 0 | 2 | 77,423,                   | 0,777       | -8.52 | -7.92 | 7.67 | -0.484 | -1.48 |
| chrX  | 15697282 | 15697676 | CASBP1    | 3.20E-09 | + | 15697282 | 15697676 | 0 | 1 | 394,                      | 0           | -8.49 | -7.9  | 4    | -0.484 | -1.48 |
| chr22 | 44168725 | 44168826 | PARVB     | 3.80E-05 | + | 44168725 | 44168826 | 0 | 1 | 101,                      | 0           | -4.42 | -4.22 | 3.38 | -0.485 | -1.48 |
| chr14 | 23285422 | 23285923 | HOMEZ     | 4.30E-09 | - | 23285422 | 23285923 | 0 | 2 | 189,11,                   | 0,490       | -8.37 | -6.76 | 1.86 | -0.485 | -1.48 |
| chr22 | 17060626 | 17060825 | CECR7     | 9.80E-06 | + | 17060626 | 17060825 | 0 | 1 | 199,                      | 0           | -5.01 | -4.78 | 4    | -0.482 | -1.48 |
| chr5  | 51377949 | 51378099 | AC010478  | 1.30E-05 | - | 51377949 | 51378099 | 0 | 1 | 150,                      | 0           | -4.88 | -3.74 | 1.75 | -0.484 | -1.48 |
| chr2  | 99117671 | 99118563 | TSGA10    | 1.40E-06 | - | 99117671 | 99118563 | 0 | 2 | 88,13,                    | 0,879       | -5.84 | -4.59 | 2.25 | -0.476 | -1.47 |
| chr15 | 66781356 | 66781705 | SMAD6     | 1.30E-10 | + | 66781356 | 66781705 | 0 | 1 | 349,                      | 0           | -9.89 | -9.04 | 8.25 | -0.476 | -1.47 |
| chr1  | 2.04E+08 | 2.04E+08 | SOX13     | 0.00035  | + | 2.04E+08 | 2.04E+08 | 0 | 1 | 150,                      | 0           | -3.45 | -3.3  | 2.67 | -0.48  | -1.47 |
| chr12 | 1.22E+08 | 1.22E+08 | WDR66     | 2.50E-12 | + | 1.22E+08 | 1.22E+08 | 0 | 3 | 67,398,235,               | 0,2644,4980 | -11.6 | -10.4 | 4.6  | -0.476 | -1.47 |
| chr1  | 62444781 | 62445377 | USP1      | 2.30E-10 | + | 62444781 | 62445377 | 0 | 1 | 596,                      | 0           | -9.63 | -8.83 | 3.61 | -0.477 | -1.47 |
| chr2  | 73258761 | 73259196 | FBXO41    | 2.30E-06 | - | 73258761 | 73259196 | 0 | 2 | 283,16,                   | 0,419       | -5.64 | -5.36 | 7.22 | -0.478 | -1.47 |
| chr18 | 58747428 | 58747629 | MALT1     | 0.00091  | + | 58747428 | 58747629 | 0 | 1 | 201,                      | 0           | -3.04 | -2.07 | 2.08 | -0.481 | -1.47 |
| chr14 | 55559278 | 55559479 | KTN1-AS1  | 7.90E-07 | - | 55559278 | 55559479 | 0 | 1 | 201,                      | 0           | -6.1  | -4.82 | 2.6  | -0.478 | -1.47 |
| chr7  | 66740060 | 66740385 | AC027644  | 4.00E-31 | - | 66740060 | 66740385 | 0 | 1 | 325,                      | 0           | -30.4 | -27.7 | 3.25 | -0.478 | -1.47 |
| chr1  | 40417065 | 40422093 | SMAP2     | 3.00E-05 | + | 40417065 | 40422093 | 0 | 2 | 31,118,                   | 0,4910      | -4.53 | -4.33 | 2.71 | -0.471 | -1.46 |
| chr6  | 1.09E+08 | 1.09E+08 | ZBTB24    | 6.30E-12 | - | 1.09E+08 | 1.09E+08 | 0 | 2 | 955,41,                   | 0,1998      | -11.2 | -10.1 | 7.23 | -0.475 | -1.46 |
| chr1  | 84479308 | 84479408 | PPF1      | 3.80E-09 | + | 84479308 | 84479408 | 0 | 1 | 100,                      | 0           | -8.42 | -7.83 | 1.32 | -0.472 | -1.46 |
| chr3  | 29281087 | 29281437 | RBMS3     | 2.90E-09 | + | 29281087 | 29281437 | 0 | 1 | 350,                      | 0           | -8.54 | -7.94 | 3.5  | -0.474 | -1.46 |
| chr2  | 10210480 | 10210581 | RRM2      | 0.00028  | + | 10210480 | 10210581 | 0 | 1 | 101,                      | 0           | -3.56 | -2.55 | 2.25 | -0.471 | -1.46 |
| chr1  | 26161463 | 26161664 | FAM110D   | 5.10E-08 | + | 26161463 | 26161664 | 0 | 1 | 201,                      | 0           | -7.29 | -6.84 | 2.57 | -0.471 | -1.46 |
| chr5  | 1.4E+08  | 1.4E+08  | ANKHD1-I  | 7.90E-11 | + | 1.4E+08  | 1.4E+08  | 0 | 1 | 101,                      | 0           | -10.1 | -9.23 | 1.79 | -0.472 | -1.46 |
| chr14 | 49620863 | 49622592 | AL139099  | 2.00E-11 | - | 49620863 | 49622592 | 0 | 2 | 185,1347,                 | 0,382       | -10.7 | -9.71 | 8.31 | -0.475 | -1.46 |
| chr10 | 79683494 | 79684192 | BEND3P3   | 9.50E-05 | + | 79683494 | 79684192 | 0 | 1 | 698,                      | 0           | -4.02 | -3.85 | 7.5  | -0.471 | -1.46 |
| chr7  | 1.51E+08 | 1.51E+08 | CHPF2     | 4.20E-06 | + | 1.51E+08 | 1.51E+08 | 0 | 1 | 644,                      | 0           | -5.38 | -5.13 | 5.44 | -0.471 | -1.45 |
| chrX  | 53412132 | 53413371 | SMC1A     | 9.50E-10 | - | 53412132 | 53413371 | 0 | 3 | 121,239,140,0,767,1099    | 0           | -9.02 | -8.34 | 2.47 | -0.468 | -1.45 |
| chr16 | 3140757  | 3141057  | ZNF213    | 2.90E-06 | + | 3140757  | 3141057  | 0 | 1 | 300,                      | 0           | -5.54 | -4.32 | 2.62 | -0.469 | -1.45 |

|       |          |          |          |          |   |          |          |   |   |           |            |       |       |      |        |       |
|-------|----------|----------|----------|----------|---|----------|----------|---|---|-----------|------------|-------|-------|------|--------|-------|
| chr17 | 59893145 | 59893246 | RPS6KB1  | 8.90E-07 | + | 59893145 | 59893246 | 0 | 1 | 101,      | 0          | -6.05 | -5.74 | 1.79 | -0.47  | -1.45 |
| chr14 | 74713193 | 74713569 | FCF1     | 6.60E-07 | + | 74713193 | 74713569 | 0 | 2 | 66,85,    | 0,291      | -6.18 | -5.85 | 1.93 | -0.47  | -1.45 |
| chr6  | 1.68E+08 | 1.68E+08 | AFDN     | 4.00E-11 | + | 1.68E+08 | 1.68E+08 | 0 | 2 | 54,197,   | 0,637      | -10.4 | -9.48 | 7.61 | -0.468 | -1.45 |
| chr4  | 1.41E+08 | 1.41E+08 | RNF150   | 2.80E-07 | - | 1.41E+08 | 1.41E+08 | 0 | 1 | 300,      | 0          | -6.55 | -5.21 | 3.17 | -0.471 | -1.45 |
| chr6  | 43587302 | 43597709 | PLIH     | 5.60E-08 | + | 43587302 | 43597709 | 0 | 2 | 187,14,   | 0,10393    | -7.25 | -6.81 | 3.18 | -0.471 | -1.45 |
| chr2  | 1.21E+08 | 1.21E+08 | GLI2     | 3.80E-06 | + | 1.21E+08 | 1.21E+08 | 0 | 1 | 850,      | 0          | -5.42 | -5.16 | 10   | -0.465 | -1.44 |
| chr17 | 2042933  | 2043430  | DPH1     | 4.00E-20 | + | 2042933  | 2043430  | 0 | 1 | 497,      | 0          | -19.4 | -17   | 4.79 | -0.463 | -1.44 |
| chr1  | 2.15E+08 | 2.15E+08 | CENPF    | 4.00E-19 | + | 2.15E+08 | 2.15E+08 | 0 | 1 | 800,      | 0          | -18.4 | -16.2 | 4.65 | -0.464 | -1.44 |
| chr16 | 3651738  | 3651888  | TRAP1    | 7.60E-10 | - | 3651738  | 3651888  | 0 | 1 | 150,      | 0          | -9.12 | -8.42 | 7.86 | -0.464 | -1.44 |
| chr7  | 2434813  | 2435013  | CHST12   | 1.00E-04 | + | 2434813  | 2435013  | 0 | 1 | 200,      | 0          | -3.98 | -2.93 | 3.4  | -0.462 | -1.44 |
| chr2  | 66435158 | 66435409 | MEIS1    | 4.70E-06 | + | 66435158 | 66435409 | 0 | 1 | 251,      | 0          | -5.33 | -5.08 | 2    | -0.464 | -1.44 |
| chr7  | 1.39E+08 | 1.39E+08 | UBN2     | 2.30E-08 | + | 1.39E+08 | 1.39E+08 | 0 | 1 | 600,      | 0          | -7.64 | -7.16 | 5.17 | -0.464 | -1.44 |
| chr7  | 1E+08    | 1E+08    | CNPY4    | 1.20E-08 | + | 1E+08    | 1E+08    | 0 | 1 | 148,      | 0          | -7.93 | -7.41 | 1.71 | -0.464 | -1.44 |
| chr16 | 88534397 | 88535143 | ZFPM1    | 1.50E-07 | + | 88534397 | 88535143 | 0 | 1 | 746,      | 0          | -6.83 | -6.44 | 6.12 | -0.464 | -1.44 |
| chr22 | 46239366 | 46239766 | PPARA    | 0.00011  | + | 46239366 | 46239766 | 0 | 1 | 400,      | 0          | -3.97 | -3.8  | 5.42 | -0.465 | -1.44 |
| chr4  | 7763456  | 7768908  | AFAP1    | 1.50E-06 | - | 7763456  | 7768908  | 0 | 2 | 335,65,   | 0,5387     | -5.83 | -5.54 | 5.2  | -0.464 | -1.44 |
| chr14 | 1.05E+08 | 1.05E+08 | INF2     | 8.50E-06 | + | 1.05E+08 | 1.05E+08 | 0 | 2 | 420,31,   | 0,847      | -5.07 | -4.84 | 4.91 | -0.465 | -1.44 |
| chr10 | 73733343 | 73733540 | DUSP8P5  | 3.50E-07 | + | 73733343 | 73733540 | 0 | 1 | 197,      | 0          | -6.45 | -5.12 | 7.2  | -0.464 | -1.44 |
| chr5  | 1.41E+08 | 1.41E+08 | PCDHGB2  | 0.0047   | + | 1.41E+08 | 1.41E+08 | 0 | 1 | 150,      | 0          | -2.33 | -1.42 | 5.75 | -0.464 | -1.44 |
| chr8  | 76863196 | 76863297 | ZFHX4    | 5.00E-04 | + | 76863196 | 76863297 | 0 | 1 | 101,      | 0          | -3.3  | -2.31 | 2.75 | -0.46  | -1.43 |
| chr6  | 20401928 | 20403730 | E2F3     | 5.80E-08 | + | 20401928 | 20403730 | 0 | 2 | 697,52,   | 0,1750     | -7.24 | -6.8  | 8    | -0.459 | -1.43 |
| chr11 | 72843236 | 72843457 | FCHSD2   | 0.0058   | - | 72843236 | 72843457 | 0 | 2 | 92,9,     | 0,212      | -2.24 | -2.12 | 1.17 | -0.457 | -1.43 |
| chr18 | 32268556 | 32268656 | GAREM1   | 3.90E-09 | - | 32268556 | 32268656 | 0 | 1 | 100,      | 0          | -8.41 | -6.8  | 2.5  | -0.458 | -1.43 |
| chr10 | 97673691 | 97673792 | PI4K2A   | 0.00095  | + | 97673691 | 97673792 | 0 | 1 | 101,      | 0          | -3.02 | -2.89 | 3.3  | -0.458 | -1.43 |
| chr16 | 69118257 | 69118506 | CHTF8    | 6.80E-08 | - | 69118257 | 69118506 | 0 | 1 | 249,      | 0          | -7.17 | -6.74 | 5.13 | -0.457 | -1.43 |
| chr17 | 78997022 | 78998200 | CANT1    | 2.00E-11 | - | 78997022 | 78998200 | 0 | 2 | 941,53,   | 0,1125     | -10.7 | -9.71 | 7.79 | -0.457 | -1.43 |
| chr19 | 38737541 | 38738276 | CAPN12   | 0.0043   | - | 38737541 | 38738276 | 0 | 2 | 97,4,     | 0,731      | -2.37 | -1.45 | 2.5  | -0.461 | -1.43 |
| chr1  | 2350953  | 2351101  | AL513477 | 5.00E-13 | - | 2350953  | 2351101  | 0 | 1 | 148,      | 0          | -12.3 | -9.85 | 3    | -0.459 | -1.43 |
| chr16 | 22332130 | 22332231 | AC092338 | 6.30E-12 | - | 22332130 | 22332231 | 0 | 1 | 101,      | 0          | -11.2 | -10.1 | 3.18 | -0.46  | -1.43 |
| chr5  | 1.39E+08 | 1.39E+08 | MATR3    | 2.40E-10 | + | 1.39E+08 | 1.39E+08 | 0 | 1 | 351,      | 0          | -9.62 | -8.82 | 1.78 | -0.452 | -1.42 |
| chr17 | 20017257 | 20017458 | SPECC1   | 7.10E-05 | + | 20017257 | 20017458 | 0 | 1 | 201,      | 0          | -4.15 | -3.97 | 4.82 | -0.453 | -1.42 |
| chr19 | 53989214 | 53989515 | CACNG8   | 6.50E-05 | + | 53989214 | 53989515 | 0 | 1 | 301,      | 0          | -4.19 | -4    | 4.67 | -0.452 | -1.42 |
| chr1  | 1.61E+08 | 1.61E+08 | UFC1     | 2.80E-10 | + | 1.61E+08 | 1.61E+08 | 0 | 1 | 201,      | 0          | -9.55 | -8.76 | 1.41 | -0.455 | -1.42 |
| chr4  | 1.86E+08 | 1.86E+08 | CYP4V2   | 0.00026  | + | 1.86E+08 | 1.86E+08 | 0 | 1 | 101,      | 0          | -3.58 | -2.57 | 3.67 | -0.455 | -1.42 |
| chr8  | 93917012 | 93917113 | PDP1     | 5.40E-06 | + | 93917012 | 93917113 | 0 | 1 | 101,      | 0          | -5.27 | -5.02 | 2.57 | -0.452 | -1.42 |
| chr16 | 30359333 | 30359534 | TBC1D10B | 0.00025  | - | 30359333 | 30359534 | 0 | 1 | 201,      | 0          | -3.6  | -3.44 | 3.2  | -0.455 | -1.42 |
| chrX  | 15803764 | 15808262 | ZRSR2    | 6.50E-06 | + | 15803764 | 15808262 | 0 | 3 | 32,87,30, | 0,346,4468 | -5.19 | -4.94 | 3.29 | -0.452 | -1.42 |
| chr6  | 52404936 | 52405136 | PAQR8    | 1.10E-05 | + | 52404936 | 52405136 | 0 | 1 | 200,      | 0          | -4.95 | -3.8  | 4    | -0.455 | -1.42 |
| chr11 | 66859976 | 66860176 | LRFN4    | 0.0026   | + | 66859976 | 66860176 | 0 | 1 | 200,      | 0          | -2.58 | -2.45 | 4.71 | -0.455 | -1.42 |
| chr5  | 1.46E+08 | 1.46E+08 | PRELID2  | 7.10E-06 | - | 1.46E+08 | 1.46E+08 | 0 | 1 | 250,      | 0          | -5.15 | -3.98 | 2.38 | -0.455 | -1.42 |
| chr16 | 3052702  | 3052802  | MMP25-A  | 0.00014  | - | 3052702  | 3052802  | 0 | 1 | 100,      | 0          | -3.86 | -2.82 | 3    | -0.452 | -1.42 |
| chr17 | 2043081  | 2043376  | OVCA2    | 1.30E-08 | + | 2043081  | 2043376  | 0 | 1 | 295,      | 0          | -7.89 | -7.38 | 4.53 | -0.453 | -1.42 |
| chr3  | 27633480 | 27633578 | AC098614 | 6.30E-05 | + | 27633480 | 27633578 | 0 | 1 | 98,       | 0          | -4.2  | -4.01 | 7.44 | -0.451 | -1.42 |
| chr6  | 5042997  | 5043197  | AL359643 | 0.00019  | + | 5042997  | 5043197  | 0 | 1 | 200,      | 0          | -3.72 | -3.56 | 6.75 | -0.451 | -1.42 |
| chr12 | 89352338 | 89352732 | AC024909 | 6.30E-06 | + | 89352338 | 89352732 | 0 | 1 | 394,      | 0          | -5.2  | -4.96 | 5.25 | -0.455 | -1.42 |
| chr5  | 1349997  | 1350392  | AC026748 | 1.40E-06 | + | 1349997  | 1350392  | 0 | 1 | 395,      | 0          | -5.84 | -5.54 | 10   | -0.452 | -1.42 |
| chr10 | 91798475 | 91798576 | TNKS2    | 6.50E-06 | + | 91798475 | 91798576 | 0 | 1 | 101,      | 0          | -5.19 | -4.94 | 1.67 | -0.45  | -1.41 |
| chr1  | 86350322 | 86351423 | ODF2L    | 9.80E-10 | - | 86350322 | 86351423 | 0 | 1 | 1101,     | 0          | -9.01 | -8.33 | 7.17 | -0.448 | -1.41 |
| chr6  | 21595544 | 21597032 | SOX4     | 3.20E-12 | + | 21595544 | 21597032 | 0 | 1 | 1488,     | 0          | -11.5 | -10.3 | 8.88 | -0.45  | -1.41 |
| chr20 | 23369733 | 23370580 | GZF1     | 4.00E-07 | + | 23369733 | 23370580 | 0 | 2 | 8,490,    | 0,357      | -6.4  | -6.06 | 8.56 | -0.45  | -1.41 |
| chr19 | 35936811 | 35939464 | LRFN3    | 7.80E-06 | + | 35936811 | 35939464 | 0 | 2 | 744,55,   | 0,2598     | -5.11 | -4.87 | 7    | -0.447 | -1.41 |

|       |          |          |           |          |   |          |          |   |   |           |             |       |       |      |        |       |
|-------|----------|----------|-----------|----------|---|----------|----------|---|---|-----------|-------------|-------|-------|------|--------|-------|
| chr1  | 1.51E+08 | 1.51E+08 | C1orf56   | 0.00028  | + | 1.51E+08 | 1.51E+08 | 0 | 1 | 199,      | 0           | -3.56 | -3.41 | 3.91 | -0.449 | -1.41 |
| chr2  | 2.2E+08  | 2.2E+08  | STK11IP   | 1.40E-10 | + | 2.2E+08  | 2.2E+08  | 0 | 2 | 290,11,   | 0,442       | -9.85 | -9.01 | 1.82 | -0.448 | -1.41 |
| chr2  | 85327071 | 85327948 | TGOLN2    | 8.70E-10 | - | 85327071 | 85327948 | 0 | 2 | 614,32,   | 0,845       | -9.06 | -8.37 | 3.87 | -0.449 | -1.41 |
| chr4  | 39273638 | 39273738 | WDR19     | 8.90E-05 | + | 39273638 | 39273738 | 0 | 1 | 100,      | 0           | -4.05 | -2.99 | 2.08 | -0.448 | -1.41 |
| chr15 | 42682398 | 42684189 | STARD9    | 1.50E-05 | + | 42682398 | 42684189 | 0 | 2 | 177,74,   | 0,1717      | -4.83 | -3.69 | 2.2  | -0.448 | -1.41 |
| chr19 | 49933236 | 49933337 | ATF5      | 2.50E-08 | + | 49933236 | 49933337 | 0 | 1 | 101,      | 0           | -7.6  | -7.12 | 1.43 | -0.448 | -1.41 |
| chr11 | 459312   | 459462   | PTDSS2    | 0.0039   | + | 459312   | 459462   | 0 | 1 | 150,      | 0           | -2.41 | -1.49 | 4.25 | -0.447 | -1.41 |
| chr12 | 1.22E+08 | 1.22E+08 | B3GNT4    | 5.90E-07 | + | 1.22E+08 | 1.22E+08 | 0 | 1 | 100,      | 0           | -6.23 | -4.93 | 3.5  | -0.449 | -1.41 |
| chr16 | 54285224 | 54285324 | IRX3      | 0.00019  | - | 54285224 | 54285324 | 0 | 1 | 100,      | 0           | -3.73 | -3.57 | 4.8  | -0.45  | -1.41 |
| chr14 | 24218199 | 24231731 | NEDD8-M   | 9.30E-09 | - | 24218199 | 24231731 | 0 | 3 | 16,48,80, | 0,184,13452 | -8.03 | -7.5  | 1.33 | -0.45  | -1.41 |
| chr20 | 64098697 | 64098797 | AL121581. | 1.20E-07 | - | 64098697 | 64098797 | 0 | 1 | 100,      | 0           | -6.93 | -5.54 | 3.33 | -0.447 | -1.41 |
| chr6  | 1.57E+08 | 1.57E+08 | ARID1B    | 1.30E-08 | + | 1.57E+08 | 1.57E+08 | 0 | 1 | 251,      | 0           | -7.9  | -7.38 | 6.83 | -0.444 | -1.4  |
| chr19 | 15160829 | 15160979 | NOTCH3    | 1.10E-05 | - | 15160829 | 15160979 | 0 | 1 | 150,      | 0           | -4.96 | -4.74 | 1.68 | -0.444 | -1.4  |
| chr5  | 1.17E+08 | 1.17E+08 | SEMA6A    | 0.00014  | - | 1.17E+08 | 1.17E+08 | 0 | 1 | 101,      | 0           | -3.84 | -2.8  | 2.6  | -0.444 | -1.4  |
| chr6  | 1.44E+08 | 1.44E+08 | PLAGL1    | 0.00019  | - | 1.44E+08 | 1.44E+08 | 0 | 1 | 100,      | 0           | -3.73 | -2.71 | 1.78 | -0.446 | -1.4  |
| chr5  | 1.13E+08 | 1.13E+08 | MCC       | 0.00087  | - | 1.13E+08 | 1.13E+08 | 0 | 2 | 340,11,   | 0,1791      | -3.06 | -2.92 | 6.2  | -0.446 | -1.4  |
| chr2  | 3379724  | 3388467  | TRAPPC12  | 2.00E-09 | + | 3379724  | 3388467  | 0 | 2 | 152,848,  | 0,7895      | -8.69 | -8.06 | 5.2  | -0.445 | -1.4  |
| chr17 | 7383629  | 7383779  | TNK1      | 0.00089  | + | 7383629  | 7383779  | 0 | 1 | 150,      | 0           | -3.05 | -2.07 | 3.4  | -0.442 | -1.4  |
| chr16 | 1781409  | 1781609  | EME2      | 0.0035   | + | 1781409  | 1781609  | 0 | 1 | 200,      | 0           | -2.46 | -2.33 | 5.57 | -0.446 | -1.4  |
| chr14 | 77113508 | 77113906 | CIPC      | 7.80E-07 | + | 77113508 | 77113906 | 0 | 1 | 398,      | 0           | -6.11 | -5.79 | 8.45 | -0.442 | -1.4  |
| chr17 | 81665183 | 81666337 | OXLD1     | 6.50E-07 | - | 81665183 | 81666337 | 0 | 2 | 401,340,  | 0,814       | -6.19 | -5.87 | 6    | -0.441 | -1.4  |
| chr10 | 50635213 | 50635663 | SGMS1-A5  | 2.60E-07 | + | 50635213 | 50635663 | 0 | 1 | 450,      | 0           | -6.59 | -5.24 | 4.8  | -0.445 | -1.4  |
| chr22 | 38671136 | 38671237 | AL021707. | 0.00026  | - | 38671136 | 38671237 | 0 | 1 | 101,      | 0           | -3.59 | -3.43 | 2    | -0.442 | -1.4  |
| chr17 | 40628903 | 40630923 | AC073508. | 9.10E-07 | - | 40628903 | 40630923 | 0 | 2 | 90,210,   | 0,1810      | -6.04 | -5.73 | 1.62 | -0.447 | -1.4  |
| chrX  | 1.24E+08 | 1.24E+08 | THOC2     | 6.30E-10 | - | 1.24E+08 | 1.24E+08 | 0 | 2 | 382,118,  | 0,1552      | -9.2  | -8.49 | 2.84 | -0.436 | -1.39 |
| chr20 | 5994382  | 5994533  | MCM8      | 1.30E-09 | + | 5994382  | 5994533  | 0 | 1 | 151,      | 0           | -8.89 | -8.23 | 1.79 | -0.437 | -1.39 |
| chr6  | 1.5E+08  | 1.5E+08  | ULBP3     | 0.00021  | - | 1.5E+08  | 1.5E+08  | 0 | 1 | 544,      | 0           | -3.67 | -2.65 | 5    | -0.439 | -1.39 |
| chr21 | 46004700 | 46004900 | COL6A1    | 8.70E-06 | + | 46004700 | 46004900 | 0 | 1 | 200,      | 0           | -5.06 | -4.83 | 2.27 | -0.438 | -1.39 |
| chr2  | 2.08E+08 | 2.08E+08 | METTL21A  | 8.30E-06 | - | 2.08E+08 | 2.08E+08 | 0 | 1 | 201,      | 0           | -5.08 | -3.92 | 3    | -0.439 | -1.39 |
| chr13 | 21140663 | 21140856 | SAP18     | 7.90E-12 | + | 21140663 | 21140856 | 0 | 2 | 18,83,    | 0,110       | -11.1 | -10   | 1.08 | -0.439 | -1.39 |
| chr5  | 1.55E+08 | 1.55E+08 | LARP1     | 1.80E-08 | + | 1.55E+08 | 1.55E+08 | 0 | 2 | 307,44,   | 0,524       | -7.75 | -7.25 | 1.86 | -0.441 | -1.39 |
| chrX  | 19913956 | 19914356 | BCLAF3    | 4.40E-10 | - | 19913956 | 19914356 | 0 | 1 | 400,      | 0           | -9.36 | -7.57 | 5.83 | -0.436 | -1.39 |
| chr21 | 45175808 | 45176559 | ADARB1    | 1.50E-06 | + | 45175808 | 45176559 | 0 | 1 | 751,      | 0           | -5.81 | -5.52 | 10.8 | -0.438 | -1.39 |
| chr1  | 268096   | 268197   | AP006222. | 6.20E-06 | - | 268096   | 268197   | 0 | 1 | 101,      | 0           | -5.21 | -4.03 | 2.17 | -0.436 | -1.39 |
| chr2  | 96022732 | 96023032 | FAHD2CP   | 7.60E-09 | + | 96022732 | 96023032 | 0 | 1 | 300,      | 0           | -8.12 | -7.57 | 13.3 | -0.437 | -1.39 |
| chr15 | 48878384 | 48879284 | EID1      | 1.60E-09 | + | 48878384 | 48879284 | 0 | 1 | 900,      | 0           | -8.79 | -8.14 | 3.5  | -0.437 | -1.39 |
| chr11 | 73983989 | 73984137 | AP003717. | 2.30E-05 | + | 73983989 | 73984137 | 0 | 1 | 148,      | 0           | -4.63 | -3.51 | 4    | -0.436 | -1.39 |
| chr16 | 546951   | 547501   | CAPN15    | 1.60E-06 | + | 546951   | 547501   | 0 | 1 | 550,      | 0           | -5.8  | -5.51 | 3.58 | -0.432 | -1.38 |
| chr2  | 1.03E+08 | 1.03E+08 | SLC9A2    | 0.0027   | + | 1.03E+08 | 1.03E+08 | 0 | 1 | 150,      | 0           | -2.57 | -2.45 | 4.42 | -0.432 | -1.38 |
| chr5  | 1.41E+08 | 1.41E+08 | PCDHB14   | 0.0032   | + | 1.41E+08 | 1.41E+08 | 0 | 1 | 248,      | 0           | -2.5  | -1.57 | 5.8  | -0.434 | -1.38 |
| chr22 | 36140874 | 36141024 | APOL3     | 5.00E-06 | - | 36140874 | 36141024 | 0 | 1 | 150,      | 0           | -5.3  | -4.11 | 2.8  | -0.432 | -1.38 |
| chr17 | 20365299 | 20365400 | CCDC144C  | 2.80E-05 | + | 20365299 | 20365400 | 0 | 1 | 101,      | 0           | -4.55 | -3.44 | 2    | -0.434 | -1.38 |
| chr16 | 30651234 | 30651383 | PRR14     | 0.00015  | + | 30651234 | 30651383 | 0 | 1 | 149,      | 0           | -3.81 | -3.65 | 3.92 | -0.432 | -1.38 |
| chr3  | 1.38E+08 | 1.38E+08 | MRAS      | 0.00025  | + | 1.38E+08 | 1.38E+08 | 0 | 2 | 43,256,   | 0,347       | -3.6  | -2.59 | 3.89 | -0.434 | -1.38 |
| chr7  | 95290118 | 95290419 | PPP1R9A   | 5.80E-06 | + | 95290118 | 95290419 | 0 | 1 | 301,      | 0           | -5.24 | -5    | 4    | -0.432 | -1.38 |
| chr15 | 88626421 | 88626621 | AEN       | 6.90E-06 | + | 88626421 | 88626621 | 0 | 1 | 200,      | 0           | -5.16 | -4.92 | 4.05 | -0.434 | -1.38 |
| chrX  | 1.21E+08 | 1.21E+08 | GLUD2     | 0.00032  | + | 1.21E+08 | 1.21E+08 | 0 | 1 | 200,      | 0           | -3.49 | -2.48 | 3.6  | -0.433 | -1.38 |
| chr2  | 24298766 | 24300160 | ITSN2     | 2.50E-07 | - | 24298766 | 24300160 | 0 | 2 | 48,252,   | 0,1142      | -6.6  | -6.24 | 3.71 | -0.433 | -1.38 |
| chr9  | 89002165 | 89002465 | S1PR3     | 7.80E-05 | + | 89002165 | 89002465 | 0 | 1 | 300,      | 0           | -4.11 | -3.04 | 7    | -0.434 | -1.38 |
| chr10 | 4651001  | 4651200  | MANCR     | 8.10E-05 | - | 4651001  | 4651200  | 0 | 1 | 199,      | 0           | -4.09 | -3.03 | 5.67 | -0.433 | -1.38 |
| chr2  | 2.27E+08 | 2.27E+08 | AC097662. | 2.70E-07 | - | 2.27E+08 | 2.27E+08 | 0 | 1 | 100,      | 0           | -6.57 | -5.22 | 9    | -0.433 | -1.38 |

|       |          |          |           |          |   |          |          |   |   |                           |               |       |       |      |        |       |
|-------|----------|----------|-----------|----------|---|----------|----------|---|---|---------------------------|---------------|-------|-------|------|--------|-------|
| chr3  | 1.39E+08 | 1.39E+08 | AC046134  | 6.60E-05 | + | 1.39E+08 | 1.39E+08 | 0 | 1 | 101,                      | 0             | -4.18 | -3.11 | 1.18 | -0.434 | -1.38 |
| chr12 | 1.24E+08 | 1.24E+08 | DDX55     | 5.00E-15 | + | 1.24E+08 | 1.24E+08 | 0 | 2 | 214,384,                  | 0,453         | -14.3 | -12.5 | 8.31 | -0.431 | -1.37 |
| chr5  | 90497687 | 90512124 | POLR3G    | 1.30E-12 | + | 90497687 | 90512124 | 0 | 4 | 47,83,147,720,4218,8840,1 |               | -11.9 | -10.6 | 2.61 | -0.428 | -1.37 |
| chr17 | 45061347 | 45061716 | NMT1      | 3.20E-07 | + | 45061347 | 45061716 | 0 | 2 | 113,38,                   | 0,331         | -6.49 | -6.14 | 1.32 | -0.428 | -1.37 |
| chr1  | 1.5E+08  | 1.5E+08  | ANP32E    | 4.10E-09 | - | 1.5E+08  | 1.5E+08  | 0 | 3 | 25,109,15,                | 0,2449,5871   | -8.39 | -7.8  | 1.4  | -0.43  | -1.37 |
| chr16 | 71474879 | 71475179 | ZNF19     | 6.50E-07 | - | 71474879 | 71475179 | 0 | 1 | 300,                      | 0             | -6.19 | -4.89 | 3.83 | -0.432 | -1.37 |
| chr1  | 2.27E+08 | 2.27E+08 | CQO8A     | 1.60E-05 | + | 2.27E+08 | 2.27E+08 | 0 | 1 | 201,                      | 0             | -4.79 | -4.58 | 3.5  | -0.43  | -1.37 |
| chr3  | 52257118 | 52259200 | WDR82     | 3.00E-10 | - | 52257118 | 52259200 | 0 | 3 | 401,143,4,                | 0,1417,2078   | -9.52 | -8.74 | 6.39 | -0.429 | -1.37 |
| chrX  | 1.33E+08 | 1.33E+08 | HS6ST2    | 1.90E-07 | - | 1.33E+08 | 1.33E+08 | 0 | 1 | 199,                      | 0             | -6.71 | -5.35 | 3.44 | -0.428 | -1.37 |
| chr19 | 58007543 | 58007893 | AC008969  | 0.0014   | + | 58007543 | 58007893 | 0 | 1 | 350,                      | 0             | -2.84 | -1.89 | 3.71 | -0.428 | -1.37 |
| chr11 | 6567069  | 6567170  | DNHD1     | 0.0012   | + | 6567069  | 6567170  | 0 | 1 | 101,                      | 0             | -2.93 | -1.97 | 3.25 | -0.43  | -1.37 |
| chr5  | 1.4E+08  | 1.4E+08  | PURA      | 2.50E-16 | + | 1.4E+08  | 1.4E+08  | 0 | 1 | 1301,                     | 0             | -15.6 | -13.6 | 8.71 | -0.431 | -1.37 |
| chr10 | 1E+08    | 1E+08    | MLMALINC  | 3.00E-04 | + | 1E+08    | 1E+08    | 0 | 1 | 201,                      | 0             | -3.52 | -2.51 | 3.6  | -0.428 | -1.37 |
| chr5  | 1.39E+08 | 1.39E+08 | MATR3     | 5.50E-10 | + | 1.39E+08 | 1.39E+08 | 0 | 1 | 348,                      | 0             | -9.26 | -8.54 | 1.82 | -0.432 | -1.37 |
| chr2  | 3570503  | 3570704  | AC108488  | 0.0025   | - | 3570503  | 3570704  | 0 | 1 | 201,                      | 0             | -2.61 | -1.67 | 2.6  | -0.432 | -1.37 |
| chr2  | 2.39E+08 | 2.39E+08 | HDAC4     | 6.20E-07 | - | 2.39E+08 | 2.39E+08 | 0 | 1 | 549,                      | 0             | -6.21 | -5.88 | 8.36 | -0.425 | -1.36 |
| chr19 | 45350536 | 45350787 | ERCC2     | 6.00E-08 | - | 45350536 | 45350787 | 0 | 1 | 251,                      | 0             | -7.22 | -6.78 | 2.83 | -0.421 | -1.36 |
| chr17 | 4948464  | 4948564  | PFN1      | 2.20E-08 | - | 4948464  | 4948564  | 0 | 1 | 100,                      | 0             | -7.66 | -7.17 | 1.5  | -0.425 | -1.36 |
| chr2  | 2.07E+08 | 2.07E+08 | KLF7      | 0.0014   | - | 2.07E+08 | 2.07E+08 | 0 | 2 | 70,31,                    | 0,9728        | -2.86 | -1.9  | 2.25 | -0.425 | -1.36 |
| chr9  | 1.13E+08 | 1.13E+08 | POLE3     | 4.00E-12 | - | 1.13E+08 | 1.13E+08 | 0 | 2 | 323,170,                  | 0,949         | -11.4 | -10.2 | 3.56 | -0.422 | -1.36 |
| chr2  | 1.9E+08  | 1.9E+08  | MFSD6     | 3.00E-04 | + | 1.9E+08  | 1.9E+08  | 0 | 1 | 151,                      | 0             | -3.52 | -2.52 | 4    | -0.425 | -1.36 |
| chr1  | 28887140 | 28893401 | EPB41     | 7.90E-12 | + | 28887140 | 28893401 | 0 | 2 | 70,31,                    | 0,6230        | -11.1 | -10   | 2.62 | -0.424 | -1.36 |
| chr17 | 82018898 | 82019245 | CENPX     | 6.80E-07 | - | 82018898 | 82019245 | 0 | 1 | 347,                      | 0             | -6.17 | -5.84 | 3.52 | -0.425 | -1.36 |
| chr7  | 1.49E+08 | 1.49E+08 | ZNF282    | 4.40E-08 | + | 1.49E+08 | 1.49E+08 | 0 | 1 | 446,                      | 0             | -7.36 | -6.91 | 4.48 | -0.422 | -1.36 |
| chr5  | 471140   | 471937   | XOC3      | 1.10E-08 | + | 471140   | 471937   | 0 | 1 | 797,                      | 0             | -7.96 | -7.44 | 5.67 | -0.422 | -1.36 |
| chr9  | 19200524 | 19200809 | AL161909  | 1.50E-05 | - | 19200524 | 19200809 | 0 | 1 | 285,                      | 0             | -4.82 | -3.69 | 3.25 | -0.424 | -1.36 |
| chr19 | 14343436 | 14343916 | LINC01842 | 2.50E-09 | + | 14343436 | 14343916 | 0 | 1 | 480,                      | 0             | -8.61 | -6.96 | 3.43 | -0.422 | -1.36 |
| chr17 | 2685116  | 2685366  | PAFAH1B1  | 6.00E-07 | + | 2685116  | 2685366  | 0 | 1 | 250,                      | 0             | -6.22 | -5.89 | 5.09 | -0.419 | -1.35 |
| chr19 | 29942308 | 29942608 | URI1      | 1.20E-10 | + | 29942308 | 29942608 | 0 | 1 | 300,                      | 0             | -9.93 | -9.07 | 1.95 | -0.42  | -1.35 |
| chr12 | 66331443 | 66338348 | HELB      | 2.00E-09 | + | 66331443 | 66338348 | 0 | 2 | 202,348,                  | 0,6557        | -8.7  | -8.07 | 6.14 | -0.419 | -1.35 |
| chr15 | 42691729 | 42692129 | STARD9    | 6.50E-05 | + | 42691729 | 42692129 | 0 | 1 | 400,                      | 0             | -4.19 | -3.12 | 2.8  | -0.416 | -1.35 |
| chr15 | 42720248 | 42720349 | STARD9    | 3.60E-05 | + | 42720248 | 42720349 | 0 | 1 | 101,                      | 0             | -4.44 | -4.24 | 3.91 | -0.419 | -1.35 |
| chr11 | 7998319  | 7998519  | EIF3F     | 4.60E-05 | + | 7998319  | 7998519  | 0 | 1 | 200,                      | 0             | -4.34 | -3.25 | 4.5  | -0.42  | -1.35 |
| chr7  | 77736463 | 77750060 | RSBN1L    | 6.30E-13 | + | 77736463 | 77750060 | 0 | 2 | 63,637,                   | 0,12960       | -12.2 | -10.8 | 12   | -0.419 | -1.35 |
| chr12 | 62191893 | 62191994 | TAF2      | 4.60E-05 | - | 62191893 | 62191994 | 0 | 1 | 101,                      | 0             | -4.34 | -3.26 | 2    | -0.419 | -1.35 |
| chr6  | 30571492 | 30578112 | ABCF1     | 6.60E-10 | + | 30571492 | 30578112 | 0 | 4 | 68,47,96,40,              | 0,5916,6325,6 | -9.18 | -8.47 | 1.49 | -0.418 | -1.35 |
| chr8  | 1.44E+08 | 1.44E+08 | HGH1      | 1.60E-09 | + | 1.44E+08 | 1.44E+08 | 0 | 1 | 396,                      | 0             | -8.8  | -8.16 | 5.62 | -0.416 | -1.35 |
| chr7  | 39950170 | 39950720 | CDK13     | 1.60E-12 | + | 39950170 | 39950720 | 0 | 1 | 550,                      | 0             | -11.8 | -10.5 | 5.75 | -0.416 | -1.34 |
| chr1  | 1.61E+08 | 1.61E+08 | NR1I3     | 4.50E-08 | - | 1.61E+08 | 1.61E+08 | 0 | 1 | 297,                      | 0             | -7.35 | -6.9  | 4.91 | -0.412 | -1.34 |
| chr16 | 88611308 | 88622219 | ZC3H18    | 1.10E-08 | + | 88611308 | 88622219 | 0 | 2 | 228,23,                   | 0,10888       | -7.95 | -7.43 | 1.61 | -0.415 | -1.34 |
| chrX  | 53082416 | 53082567 | TSPYL2    | 1.50E-06 | + | 53082416 | 53082567 | 0 | 1 | 151,                      | 0             | -5.81 | -5.52 | 2.33 | -0.415 | -1.34 |
| chrX  | 1.03E+08 | 1.03E+08 | BHLHB9    | 1.00E-06 | + | 1.03E+08 | 1.03E+08 | 0 | 1 | 299,                      | 0             | -5.99 | -5.69 | 7.6  | -0.415 | -1.34 |
| chr6  | 2988559  | 2988856  | LINC01011 | 1.30E-05 | + | 2988559  | 2988856  | 0 | 1 | 297,                      | 0             | -4.88 | -4.66 | 8    | -0.416 | -1.34 |
| chr15 | 57712063 | 57714610 | POLR2M    | 6.30E-12 | + | 57712063 | 57714610 | 0 | 2 | 125,75,                   | 0,2472        | -11.2 | -10.1 | 3.75 | -0.413 | -1.34 |
| chr1  | 24358192 | 24358592 | STPG1     | 7.20E-07 | - | 24358192 | 24358592 | 0 | 1 | 400,                      | 0             | -6.14 | -5.82 | 6.5  | -0.408 | -1.33 |
| chr1  | 2.15E+08 | 2.15E+08 | CENPF     | 2.00E-18 | + | 2.15E+08 | 2.15E+08 | 0 | 2 | 138,63,                   | 0,1577        | -17.7 | -15.5 | 1.56 | -0.409 | -1.33 |
| chr16 | 50153781 | 50154231 | TENT4B    | 4.00E-12 | + | 50153781 | 50154231 | 0 | 1 | 450,                      | 0             | -11.4 | -10.2 | 4.82 | -0.41  | -1.33 |
| chr17 | 27625439 | 27625590 | KSR1      | 5.60E-05 | + | 27625439 | 27625590 | 0 | 1 | 151,                      | 0             | -4.25 | -3.18 | 2.5  | -0.406 | -1.33 |
| chr1  | 2.28E+08 | 2.28E+08 | SNAP47    | 7.10E-06 | + | 2.28E+08 | 2.28E+08 | 0 | 1 | 300,                      | 0             | -5.15 | -4.91 | 7    | -0.408 | -1.33 |
| chr11 | 70206146 | 70207092 | FADD      | 6.00E-08 | + | 70206146 | 70207092 | 0 | 1 | 946,                      | 0             | -7.22 | -6.78 | 8.89 | -0.411 | -1.33 |
| chr4  | 87135662 | 87136262 | AFF1      | 5.20E-05 | + | 87135662 | 87136262 | 0 | 1 | 600,                      | 0             | -4.28 | -4.09 | 5.94 | -0.409 | -1.33 |

|       |          |          |           |          |   |          |          |   |   |                           |             |   |       |       |      |        |       |
|-------|----------|----------|-----------|----------|---|----------|----------|---|---|---------------------------|-------------|---|-------|-------|------|--------|-------|
| chr15 | 34341850 | 34343085 | NOP10     | 3.20E-22 | - | 34341850 | 34343085 | 0 | 2 | 258,66,                   | 0,1169      |   | -21.5 | -19.1 | 1.96 | -0.41  | -1.33 |
| chr19 | 12272329 | 12272777 | ZNF44     | 2.40E-07 | - | 12272329 | 12272777 | 0 | 1 | 448,                      |             | 0 | -6.62 | -5.27 | 5.67 | -0.411 | -1.33 |
| chr19 | 14151086 | 14151587 | ADGRL1    | 6.30E-14 | - | 14151086 | 14151587 | 0 | 1 | 501,                      |             | 0 | -13.2 | -11.6 | 9.47 | -0.402 | -1.32 |
| chrX  | 1.3E+08  | 1.3E+08  | BCORL1    | 6.50E-05 | + | 1.3E+08  | 1.3E+08  | 0 | 1 | 551,                      |             | 0 | -4.19 | -4.01 | 4.27 | -0.404 | -1.32 |
| chr1  | 1.51E+08 | 1.51E+08 | PSMD4     | 1.40E-10 | + | 1.51E+08 | 1.51E+08 | 0 | 1 | 150,                      |             | 0 | -9.85 | -9.01 | 1.2  | -0.404 | -1.32 |
| chr3  | 14113011 | 14116439 | CHCHD4    | 2.30E-08 | - | 14113011 | 14116439 | 0 | 2 | 183,14,                   | 0,3414      |   | -7.64 | -7.15 | 4.64 | -0.403 | -1.32 |
| chr4  | 1.52E+08 | 1.52E+08 | FAM160A1  | 6.90E-07 | + | 1.52E+08 | 1.52E+08 | 0 | 1 | 251,                      |             | 0 | -6.16 | -5.83 | 2.85 | -0.406 | -1.32 |
| chr12 | 48837619 | 48837720 | DDX23     | 9.80E-08 | - | 48837619 | 48837720 | 0 | 1 | 101,                      |             | 0 | -7.01 | -6.6  | 1.29 | -0.404 | -1.32 |
| chr1  | 1385859  | 1386158  | CCNL2     | 1.00E-04 | - | 1385859  | 1386158  | 0 | 1 | 299,                      |             | 0 | -4    | -3.83 | 3.33 | -0.404 | -1.32 |
| chr5  | 1.39E+08 | 1.39E+08 | PROB1     | 0.0043   | - | 1.39E+08 | 1.39E+08 | 0 | 1 | 100,                      |             | 0 | -2.37 | -1.46 | 2.45 | -0.404 | -1.32 |
| chr1  | 71237212 | 71237313 | ZRANB2-A  | 2.50E-05 | + | 71237212 | 71237313 | 0 | 1 | 101,                      |             | 0 | -4.6  | -3.49 | 3.6  | -0.404 | -1.32 |
| chr22 | 23262816 | 23263065 | FBXW4P1   | 3.50E-07 | + | 23262816 | 23263065 | 0 | 1 | 249,                      |             | 0 | -6.45 | -6.1  | 8.29 | -0.406 | -1.32 |
| chr12 | 6824921  | 6825530  | GPR162    | 7.40E-06 | + | 6824921  | 6825530  | 0 | 2 | 251,47,                   | 0,562       |   | -5.13 | -4.89 | 7.21 | -0.404 | -1.32 |
| chr19 | 33304404 | 33305004 | CEBPA-DT  | 1.20E-06 | + | 33304404 | 33305004 | 0 | 1 | 600,                      |             | 0 | -5.92 | -5.62 | 18.4 | -0.405 | -1.32 |
| chr3  | 1.87E+08 | 1.87E+08 | ST6GAL1   | 1.50E-06 | + | 1.87E+08 | 1.87E+08 | 0 | 1 | 401,                      |             | 0 | -5.81 | -5.52 | 2.9  | -0.399 | -1.31 |
| chr7  | 99403485 | 99408548 | PDAP1     | 4.20E-10 | - | 99403485 | 99408548 | 0 | 3 | 40,96,13,                 | 0,1372,5050 |   | -9.38 | -8.63 | 1.67 | -0.402 | -1.31 |
| chr4  | 56314127 | 56315277 | KIAA1211  | 1.00E-09 | + | 56314127 | 56315277 | 0 | 1 | 1150,                     |             | 0 | -8.98 | -8.31 | 5.39 | -0.398 | -1.31 |
| chr17 | 56891979 | 56892229 | TRIM25    | 1.60E-07 | - | 56891979 | 56892229 | 0 | 1 | 250,                      |             | 0 | -6.8  | -6.42 | 5.56 | -0.4   | -1.31 |
| chr16 | 15724351 | 15726886 | MYH11     | 7.90E-11 | - | 15724351 | 15726886 | 0 | 4 | 58,153,251,30,295,536,249 |             |   | -10.1 | -9.24 | 7.14 | -0.402 | -1.31 |
| chr16 | 2597657  | 2598156  | PDPK1     | 1.50E-06 | + | 2597657  | 2598156  | 0 | 1 | 499,                      |             | 0 | -5.82 | -5.52 | 9.17 | -0.402 | -1.31 |
| chrX  | 9944896  | 9946953  | SHROOM2   | 5.00E-06 | + | 9944896  | 9946953  | 0 | 2 | 17,283,                   | 0,1774      |   | -5.3  | -4.11 | 3.75 | -0.401 | -1.31 |
| chr2  | 2.36E+08 | 2.36E+08 | AGAP1     | 4.40E-10 | + | 2.36E+08 | 2.36E+08 | 0 | 1 | 898,                      |             | 0 | -9.36 | -8.62 | 8    | -0.402 | -1.31 |
| chr2  | 2.27E+08 | 2.27E+08 | IRS1      | 5.10E-07 | - | 2.27E+08 | 2.27E+08 | 0 | 1 | 100,                      |             | 0 | -6.29 | -4.98 | 2.83 | -0.4   | -1.31 |
| chr11 | 369597   | 369796   | B4GALNT4  | 4.10E-05 | + | 369597   | 369796   | 0 | 1 | 199,                      |             | 0 | -4.39 | -4.19 | 2.67 | -0.399 | -1.31 |
| chr10 | 1.02E+08 | 1.02E+08 | OGA       | 6.30E-11 | - | 1.02E+08 | 1.02E+08 | 0 | 1 | 201,                      |             | 0 | -10.2 | -9.33 | 1.5  | -0.399 | -1.31 |
| chr22 | 28002131 | 28002232 | TTC28-AS. | 0.0022   | + | 28002131 | 28002232 | 0 | 1 | 101,                      |             | 0 | -2.66 | -1.72 | 4.2  | -0.401 | -1.31 |
| chr6  | 1.58E+08 | 1.58E+08 | GTF2H5    | 3.30E-09 | + | 1.58E+08 | 1.58E+08 | 0 | 1 | 250,                      |             | 0 | -8.48 | -7.89 | 2    | -0.399 | -1.31 |
| chr1  | 1.48E+08 | 1.48E+08 | AC245100  | 4.70E-06 | + | 1.48E+08 | 1.48E+08 | 0 | 1 | 290,                      |             | 0 | -5.33 | -5.08 | 5.56 | -0.402 | -1.31 |



diff.log2.fc  
-2.72  
-1.19  
-1.48  
-4.91  
-1.72  
-1.63  
-1.95  
-3.75  
-2.81  
-4.39  
-0.476  
-4.02  
-2.83  
-2.81  
-0.83  
-1.67  
-3.17  
-1.1  
-0.604  
-1.05  
-5.71  
-1.18  
-1.36  
-1.76  
-1.01  
-1.41  
-4  
-2.31  
-0.137  
-0.837  
-1.26  
-1.58  
-0.576  
-2.43  
-1.51  
-1.69  
-1.76  
-2.18  
-0.871  
-1.15  
-0.62  
-1.63  
-1.55  
-0.652  
-0.96  
-2.79  
-1.45  
-0.521

-0.794  
-4.57  
-0.476  
-1.44  
-1.39  
-2.3  
-0.667  
-2.64  
-1.43  
-0.517  
-1.76  
-1.3  
-1.38  
-1.02  
-0.479  
-0.396  
-0.782  
-0.609  
-0.913  
-0.565  
-0.0165  
-0.399  
-3.14  
-2.37  
-0.531  
-0.739  
-1.41  
-2.47  
-0.755  
-1.03  
-0.54  
-3.64  
-1.15  
-0.311  
-0.0585  
-1.03  
-0.567  
-0.79  
-0.174  
-0.772  
-0.336  
-1.67  
-2.09  
-1.04  
-0.567  
-0.0159  
-4.7  
-1  
-0.235  
-1.42  
-1.98

-2.43  
-0.763  
-0.606  
-1.02  
-1.64  
-0.405  
-4.76  
-0.455  
-0.456  
-1.06  
-0.734  
-2.33  
-0.552  
-0.544  
-0.444  
-1.56  
-0.477  
-1.56  
-0.964  
-0.379  
-0.638  
-1.05  
-0.554  
-0.541  
-1.78  
-0.603  
-1.15  
-0.942  
-0.487  
-2.49  
-0.67  
-0.49  
-1.36  
-1.96  
-1.76  
-1.77  
-0.811  
-0.578  
-0.219  
-2.74  
-0.72  
-0.783  
-1.9  
-0.777  
-1.67  
-1.24  
-0.678  
-2.84  
-1.66  
-2.87  
-0.917

-1.73  
-1.8  
-0.254  
-2.34  
-0.344  
-1.33  
-0.793  
-1.7  
-0.719  
-0.469  
-1.55  
-1.2  
-0.571  
-1.66  
-2.32  
-0.672  
-1.31  
-0.0995  
-1.4  
-2.36  
-3.04  
-1.51  
-0.862  
-0.647  
-0.0815  
-0.607  
-0.248  
-0.61  
-2.15  
-1.12  
-0.865  
-0.344  
-0.763  
-2.67  
-0.714  
-2.73  
-0.719  
-0.969  
-2.68  
-1.71  
-1.38  
-0.805  
-0.597  
-0.726  
-0.854  
-2.12  
-0.704  
-0.549  
-0.222  
-1.93  
-1.36

-1.34  
-1  
-0.167  
-0.574  
-0.859  
-0.914  
-1.91  
-0.942  
-2.12  
-1.13  
-0.865  
-0.643  
-1.22  
-1.05  
-2.02  
-0.817  
-0.783  
-0.742  
-0.323  
-0.814  
-0.982  
-2.53  
-1.59  
-0.82  
-2  
-1.02  
-0.897  
-1.3  
-2.09  
-0.44  
-0.909  
-0.816  
-0.699  
-1.31  
-0.973  
-2.22  
-0.93  
-2.73  
-0.968  
-1.38  
-0.442  
-0.934  
-2.2  
-0.083  
-0.525  
-1.07  
-0.37  
-1.3  
-1.72  
-0.698  
-1.51

-2.46  
-1.3  
-0.875  
-0.772  
-0.742  
-0.338  
-1.02  
-1.43  
-0.795  
-1.03  
-0.22  
-3.75  
-1.57  
-0.0348  
-1.3  
-0.598  
-1.61  
-2.06  
-0.637  
-1.83  
-1.05  
-0.114  
-2.07  
-2.45  
-0.635  
-1.48  
-0.369  
-1.72  
-1.16  
-1.42  
-1.42  
-1.73  
-1.64  
-1.72  
-0.126  
-0.83  
-3.86  
-0.0473  
-0.973  
-2.74  
-1.69  
-0.44  
-1.66  
-0.266  
-1.1  
-1.49  
-0.402  
-0.447  
-0.13  
-1.34  
-0.193

-1.15  
-0.116  
-1.91  
-1.12  
-1.06  
-0.909  
-0.951  
-3.9  
-0.27  
-0.933  
-0.726  
-0.56  
-0.505  
-0.485  
-0.778  
-0.624  
-1.61  
-1.18  
-0.676  
-1.84  
-0.454  
-0.272  
-0.951  
-1.64  
-0.643  
-0.721  
-0.611  
-0.486  
-0.319  
-0.588  
-1.39  
-0.954  
-0.966  
-0.378  
-0.686  
-2.02  
-1.64  
-0.412  
-2.16  
-0.475  
-2.09  
-1.6  
-2.12  
-0.754  
-1.15  
-0.545  
-2.56  
-2.97  
-2.23  
-0.543  
-0.734

-0.878  
-0.922  
-0.632  
-0.616  
-1.04  
-0.573  
-0.407  
-1.03  
-2.57  
-0.365  
-0.969  
-2.2  
-1.14  
-3.09  
-1.97  
-1.11  
-0.773  
-0.594  
-0.942  
-0.83  
-2.95  
-3.22  
-1.15  
-1.64  
-1.35  
-1.32  
-1.41  
-1.66  
-1.66  
-1.25  
-0.652  
-2.18  
-2.72  
-1.1  
-0.645  
-1.71  
-2.65  
-1.44  
-0.316  
-2.2  
-0.877  
-0.548  
-0.883  
-0.974  
-0.0939  
-0.632  
-1.16  
-0.978  
-3.09  
-0.675  
-0.739



-1.49  
-0.806  
-0.985  
-0.98  
-1.11  
-1.63  
-0.617  
-1.14  
-1.67  
-1.24  
-1.61  
-0.693  
-3.52  
-0.34  
-2.15  
-0.194  
-1.72  
-2.08  
-1.29  
-0.665  
-2.27  
-1.65  
-1.29  
-1.31  
-0.665  
-1.02  
-0.461  
-0.324  
-0.137  
-0.522  
-3.43  
-0.403  
-0.907  
-1.11  
-1.16  
-1.18  
-0.83  
-2.91  
-2  
-0.192  
-0.36  
-3  
-1.45  
-2.11  
-0.49  
-3.46  
-1.01  
-0.68  
-1.67  
-3.91  
-1.99

-0.663  
-0.253  
-0.963  
-0.515  
-0.215  
-0.757  
-3.06  
-1.67  
-0.405  
-0.42  
-0.944  
-0.724  
-0.643  
-0.0418  
-1.13  
-0.22  
-1.61  
-1.47  
-0.637  
-3.78  
-0.984  
-1.19  
-2.96  
-1.2  
-0.67  
-1.61  
-3.46  
-1.23  
-0.533  
-1.38  
-0.181  
-2.58  
-1.46  
-0.53  
-0.373  
-0.758  
-0.0106  
-1.93  
-1.34  
-0.761  
-0.909  
-1.77  
-2.21  
-1.57  
-0.592  
-0.384  
-0.357  
-0.846  
-0.769  
-0.751  
-1.09

-2.46  
-0.424  
-0.753  
-0.208  
-1.58  
-1.5  
-0.679  
-1.09  
-0.623  
-3.07  
-0.877  
-0.573  
-1.19  
-0.0914  
-2.06  
-1.44  
-0.491  
-2  
-0.372  
-0.441  
-0.0191  
-1.09  
-0.358  
-2.46  
-0.596  
-0.416  
-1.85  
-1.04  
-0.309  
-0.613  
-1.48  
-0.647  
-0.757  
-0.704  
-0.46  
-1.11  
-1.65  
-0.0536  
-0.676  
-0.879  
-1.68  
-0.756  
-1.3  
-0.654  
-0.616  
-2.18  
-0.509  
-0.86  
-1.11  
-0.447  
-0.881

-1.07  
-0.34  
-1.36  
-1.39  
-1.11  
-1  
-0.82  
-0.153  
-1.05  
-0.856  
-0.586  
-2  
-2.24  
-1.83  
-1.33  
-1.75  
-0.0311  
-0.0322  
-0.618  
-2  
-0.142  
-0.47  
-1.91  
-2.02  
-1.22  
-1.7  
-1.96  
-0.322  
-0.42  
-0.47  
-1.15  
-0.963  
-0.302  
-0.0825  
-0.558  
-0.691  
-1.28  
-1.54  
-1.05  
-3.32  
-0.521  
-1.94  
-1.15  
-0.715  
-2.11  
-0.738  
-2.39  
-0.615  
-0.852  
-0.569  
-0.661

-0.708  
-0.898  
-0.462  
-0.586  
-0.381  
-0.794  
-0.18  
-0.925  
-0.379  
-0.39  
-1.27  
-0.534  
-0.403  
-1.87  
-1.21  
-0.319  
-0.879  
-1.87  
-0.394  
-0.699  
-3.17  
-0.735  
-1.27  
-0.682  
-0.652  
-0.933  
-1.64  
-0.7  
-0.801  
-0.468  
-0.877  
-1.71  
-1.66  
-1.08  
-1.71  
-0.188  
-1.19  
-2.28  
-0.724  
-0.0489  
-1.83  
-0.448  
-4.52  
-1.24  
-2.84  
-0.932  
-0.339  
-1.31  
-1.77  
-1.1  
-0.766

-0.76  
-1.89  
-0.958  
-1.1  
-1.98  
-0.255  
-0.701  
-1.54  
-0.56  
-0.49  
-0.436  
-0.765  
-0.321  
-2.16  
-0.689  
-1.23  
-0.562  
-0.0305  
-2.04  
-0.599  
-0.936  
-0.366  
-0.555  
-0.661  
-2.02  
-0.439  
-1.48  
-3.54  
-0.681  
-1.19  
-2.27  
-0.894  
-0.598  
-0.609  
-0.251  
-1.09  
-2.71  
-2  
-0.885  
-0.954  
-2.91  
-1.9  
-0.995  
-1.47  
-1.26  
-0.336  
-0.288  
-2.17  
-0.417  
-0.49  
-1.02

-1.72  
-0.677  
-1.23  
-0.743  
-0.122  
-1.5  
-0.998  
-0.18  
-2.36  
-0.667  
-2.75  
-0.447  
-0.482  
-0.635  
-0.457  
-0.469  
-0.616  
-1.04  
-2.36  
-2.81  
-0.695  
-1.29  
-0.886  
-0.648  
-2.28  
-1  
-0.442  
-0.33  
-1.24  
-2.94  
-1.14  
-0.5  
-1.68  
-0.972  
-1.45  
-0.259  
-1.61  
-0.98  
-0.384  
-0.706  
-1.35  
-0.736  
-0.613  
-1.83  
-0.741  
-1.91  
-1.85  
-0.105  
-1.8  
-1.13  
-1.18

-1.54  
-1.11  
-0.133  
-1.29  
-1.48  
-1.12  
-0.902  
-2.59  
-1.02  
-0.859  
-0.636  
-0.479  
-0.36  
-2.3  
-0.403  
-0.564  
-1.35  
-0.689  
-1.28  
-0.943  
-0.324  
-1.79  
-0.408  
-0.699  
-0.764  
-0.278  
-0.993  
-0.808  
-0.0725  
-1.55  
-0.647  
-0.732  
-1.5  
-1.11  
-0.495  
-0.0747  
-0.608  
-0.141  
-2.15  
-0.871  
-0.628  
-1.05  
-1.19  
-0.913  
-1.22  
-0.369  
-1.61  
-0.29  
-1.03  
-0.454  
-1.21



-1.02  
-0.669  
-0.94  
-0.894  
-0.684  
-0.669  
-1.66  
-0.702  
-3.21  
-0.71  
-1.18  
-0.217  
-2  
-0.773  
-1.26  
-1.31  
-1.94  
-2.95  
-0.496  
-0.628  
-0.31  
-1.67  
-0.398  
-1.79  
-1.18  
-0.5  
-0.0152  
-0.468  
-0.286  
-1.57  
-2.17  
-0.841  
-2.32  
-0.55  
-1.01  
-0.852  
-1.24  
-0.411  
-0.538  
-0.944  
-1.67  
-0.995  
-0.777  
-1.22  
-0.901  
-0.971  
-1.43  
-2.32  
-1.98  
-1.35  
-1.62

-1.65  
-0.525  
-0.724  
-0.767  
-1.23  
-0.594  
-0.524  
-0.872  
-0.547  
-0.656  
-1.17  
-1.34  
-1.31  
-0.579  
-0.241  
-1.76  
-0.907  
-1.67  
-1.56  
-0.74  
-1.88  
-1.27  
-0.587  
-2.27  
-0.997  
-1.28  
-0.842  
-0.881  
-1.64  
-1.02  
-0.767  
-2.29  
-0.775  
-0.621  
-1.29  
-1.76  
-0.985  
-2.52  
-1  
-0.348  
-1.19  
-0.325  
-0.302  
-1.77  
-1.05  
-1.75  
-0.766  
-0.467  
-0.955  
-1.7  
-1.2

-2.24  
-0.786  
-1.08  
-1.03  
-1.51  
-1.95  
-0.565  
-1.77  
-1.41  
-0.617  
-0.379  
-0.598  
-1.16  
-0.79  
-0.734  
-0.352  
-1.12  
-0.865  
-0.856  
-2.03  
-0.454  
-1.4  
-2.53  
-2.07  
-3.58  
-0.742  
-0.723  
-0.196  
-0.51  
-0.91  
-0.511  
-0.708  
-1.02  
-1.47  
-0.882  
-1.84  
-2.27  
-1.5  
-0.722  
-0.769  
-1.47  
-1.46  
-2  
-1.77  
-0.779  
-2.22  
-1.37  
-0.507  
-1.02  
-1.24  
-0.963

-0.0339  
-0.313  
-0.893  
-3.32  
-0.647  
-0.482  
-1.87  
-1.09  
-0.943  
-0.96  
-1.87  
-0.671  
-1.81  
-0.252  
-0.861  
-0.056  
-1.7  
-0.498  
-0.888  
-0.762  
-1.37  
-1.96  
-0.372  
-1.5  
-0.882  
-0.671  
-1.76  
-1.24  
-1.22  
-0.382  
-1.56  
-1.84  
-0.862  
-0.65  
-0.594  
-0.632  
-0.35  
-0.915  
-1.37  
-0.413  
-0.458  
-1.22  
-0.473  
-2.32  
-0.751  
-0.492  
-0.585  
-1.81  
-1.37  
-2.97  
-0.535

-1.17  
-1.32  
-0.767  
-0.826  
-0.792  
-0.503  
-0.521  
-1.15  
-0.77  
-0.824  
-0.953  
-0.907  
-0.162  
-0.254  
-0.276  
-0.146  
-0.186  
-0.436  
-0.458  
-0.299  
-0.361  
-1.06  
-0.0195  
-1.76  
-0.872  
-0.807  
-0.774  
-0.499  
-0.812  
-0.971  
-0.572  
-0.576  
-0.578  
-0.17  
-0.494  
-1.72  
-1.4  
-0.884  
-1.48  
-1.15  
-0.216  
-0.409  
-0.199  
-0.838  
-0.298  
-1.67  
-0.385  
-0.531  
-0.62  
-1.01  
-1.04

-0.107  
-0.567  
-0.858  
-0.664  
-1.06  
-0.253  
-0.872  
-1.17  
-0.857  
-1.37  
-1.58  
-2.02  
-0.489  
-1.11  
-0.439  
-0.468  
-0.367  
-0.574  
-1.13  
-0.684  
-3.39  
-0.0969  
-0.938  
-1.04  
-1.57  
-0.409  
-0.194  
-2.43  
-2.28  
-2.07  
-0.224  
-1.03  
-0.377  
-1.13  
-0.921  
-0.403  
-0.973  
-0.573  
-1.24  
-3.48  
-0.58  
-0.203  
-1.35  
-0.714  
-0.699  
-0.299  
-0.669  
-1.6  
-0.636  
-1.01  
-1.2

-0.534  
-0.342  
-0.786  
-1.83  
-0.862  
-0.878  
-0.556  
-0.671  
-0.283  
-0.249  
-0.34  
-1.55  
-0.889  
-1.12  
-0.812  
-2.29  
-0.66  
-0.397  
-0.603  
-0.0451  
-0.345  
-2.79  
-1.4  
-1.36  
-0.874  
-0.511  
-1.16  
-0.914  
-0.851  
-0.848  
-1.33  
-1.81  
-0.989  
-0.801  
-0.733  
-0.533  
-0.16  
-0.986  
-1.23  
-1.03  
-1.15  
-0.71  
-0.71  
-0.673  
-0.668  
-0.813  
-1.48  
-1.21  
-0.576  
-0.719  
-0.307

-0.149  
-1.04  
-2.25  
-0.274  
-0.98  
-0.713  
-0.388  
-1.08  
-0.205  
-0.807  
-0.596  
-0.768  
-0.615  
-0.629  
-0.339  
-0.769  
-0.455  
-0.715  
-0.854  
-1.47  
-0.306  
-0.319  
-1.09  
-0.749  
-1.31  
-1.41  
diff.log2.fc  
5.16  
1.32  
4.07  
1.58  
4.04  
4.91  
4.86  
2.58  
1.97  
1.86  
1.82  
1.2  
3.75  
2.25  
3.47  
1.25  
3.19  
1.43  
3.47  
1.83  
3.42  
1.3  
2.7  
3.32



3.22  
2.7  
1.35  
0.36  
0.754  
3.37  
0.263  
0.18  
0.594  
0.308  
2.07  
1.52  
0.176  
1.06  
3.17  
0.785  
3.71  
1.91  
1.16  
0.652  
0.639  
0.74  
2.02  
1.63  
0.921  
2.03  
0.625  
0.257  
0.897  
0.478  
1.13  
0.507  
0.63  
0.537  
1.4  
1.56  
2.25  
0.894  
1.4  
3.61  
0.621  
1.35  
2.01  
0.409  
0.257  
1.88  
4.62  
1.06  
1.53  
1.86  
1

1.73  
1.16  
1.9  
1.13  
1.26  
0.652  
1.32  
1.09  
3.51  
2.8  
0.525  
1.88  
0.75  
1.98  
0.292  
2.95  
0.318  
1.03  
0.923  
0.0704  
1.32  
1.61  
2.32  
2.52  
1.15  
1.7  
0.433  
1.66  
0.956  
1.79  
1.94  
3.46  
0.591  
1.48  
1.29  
3.54  
0.96  
1.81  
1.18  
0.297  
1.21  
3.6  
4.22  
1.88  
0.109  
2.42  
0.028  
0.355  
0.51  
0.907  
3.12

1.03  
0.409  
0.478  
2.3  
0.848  
0.477  
1.03  
2.29  
0.64  
0.565  
0.71  
3.7  
0.64  
0.657  
0.86  
0.427  
1.8  
0.517  
2.12  
3.32  
2.74  
3.12  
0.0372  
1.74  
0.524  
0.17  
2.44  
0.472  
1.49  
2.92  
0.0995  
5.1  
3.54  
1.1  
2.14  
1.19  
0.201  
0.454  
2.27  
0.2  
1.42  
2.66  
0.826  
1.09  
0.799  
1.02  
1.94  
1.37  
1.21  
2.6  
2.91

0.91  
1.14  
0.693  
0.0186  
0.533  
1.22  
0.264  
1.7  
2.21  
1.09  
0.371  
1.72  
0.354  
1.38  
1.93  
0.0191  
1.19  
0.356  
1.05  
1.25  
0.291  
2.23  
0.775  
3.56  
0.233  
1.64  
0.478  
0.648  
1.71  
1.85  
2.44  
0.724  
1.53  
1.36  
0.67  
1.66  
1.6  
0.833  
1.43  
0.575  
2.48  
1.24  
1.01  
0.819  
1.29  
1.22  
0.435  
1.29  
1.26  
1.12  
0.528

0.677  
0.579  
1.31  
1.54  
0.679  
0.542  
4.13  
1.18  
0.825  
0.469  
1.03  
0.242  
0.253  
1.88  
1.22  
2.63  
1.79  
1.99  
0.704  
1.95  
0.453  
0.575  
2.75  
0.551  
1.11  
1.26  
0.559  
1.74  
1.33  
0.707  
2.51  
1.24  
0.71  
0.175  
2.23  
1.04  
3.08  
0.4  
0.592  
0.0544  
2.22  
2.19  
0.631  
0.32  
0.385  
3.52  
0.837  
1.58  
1.93  
2.77  
0.989

1.42  
0.74  
0.511  
1.16  
1.88  
1.79  
0.333  
3.97  
0.741  
3.49  
0.399  
2.24  
0.508  
0.632  
0.619  
1.03  
0.489  
2.09  
1.38  
1.28  
0.664  
1.05  
1.82  
0.25  
0.0672  
0.775  
1.39  
1.61  
0.937  
0.932  
1.2  
0.844  
1.28  
1.82  
1.47  
1.78  
0.556  
2.62  
0.737  
2.02  
0.872  
0.446  
3.01  
0.465  
1.31  
1.95  
1.24  
0.467  
0.511  
1.47  
1.15

0.643  
1.37  
0.802  
0.379  
0.801  
1.67  
1.34  
0.642  
0.506  
1.16  
1.86  
0.398  
3.1  
0.848  
0.635  
0.666  
2.4  
0.787  
1.54  
1.29  
0.816  
1.5  
1.11  
1.23  
2.67  
2.68  
0.234  
2.62  
2.29  
1.97  
3.83  
0.494  
0.828  
0.11  
1.63  
0.776  
1.2  
0.316  
0.908  
2.22  
0.599  
2.68  
0.268  
1.09  
3.09  
1.59  
0.825  
2.38  
0.93  
1.19  
0.183

1.78  
0.956  
0.396  
0.238  
1.58  
1.18  
0.726  
0.504  
2.33  
1.91  
0.184  
0.593  
0.32  
0.599  
0.463  
0.382  
0.8  
0.628  
1.58  
1.23  
0.188  
1.54  
2.22  
1.81  
0.664  
0.161  
2.46  
2.75  
1.71  
1.13  
1.79  
0.684  
1.1  
3.8  
0.107  
1.48  
0.843  
0.159  
2.84  
2.52  
1.61  
0.833  
0.686  
0.681  
0.425  
0.808  
0.586  
0.755  
0.626  
1.67  
0.658



0.555  
1.1  
0.831  
1.15  
0.644  
1.05  
3.5  
1.56  
0.432  
0.385  
2.34  
0.555  
2.81  
1.45  
2.39  
0.878  
0.836  
1.83  
2.83  
1.06  
0.455  
0.69  
1.2  
0.982  
1.39  
1.41  
0.362  
0.642  
2.49  
0.928  
0.455  
0.92  
1.43  
1.25  
2.94  
0.994  
1.57  
0.933  
3.12  
0.801  
0.458  
0.604  
1.2  
1.95  
1.21  
1.07  
1.59  
2.03  
0.547  
1.62  
0.725

0.686  
1.27  
1.79  
1.34  
0.78  
0.346  
1.03  
0.747  
1.1  
0.538  
1.15  
1.01  
0.51  
0.352  
0.929  
0.527  
0.194  
0.285  
2.06  
0.339  
1  
1.01  
0.0652  
0.9  
1.91  
0.939  
1.63  
0.973  
0.642  
1  
1.36  
0.822  
0.747  
0.0589  
1.11  
0.0841  
0.582  
0.763  
0.776  
1.23  
2.03  
1.81  
0.569  
0.723  
2.35  
0.466  
0.724  
1.71  
0.799  
2.04  
0.41

3.29  
0.585  
0.66  
1.38  
1.04  
1.29  
0.247  
0.285  
0.929  
0.543  
0.475  
0.707  
1.2  
0.0841  
2.46  
1.66  
1.91  
1.32  
1.89  
1.95  
1.62  
0.444  
2.15  
0.711  
1.39  
0.959  
1.34  
0.257  
1.24  
0.805  
2.51  
0.318  
0.426  
0.721  
1.5  
0.805  
1.59  
0.567  
0.922  
0.923  
0.536  
1.46  
0.601  
1.55  
1.99  
0.933  
0.572  
0.73  
0.774  
1.07  
0.899

0.967  
0.373  
1.03  
0.647  
0.441  
0.262  
0.765  
0.716  
0.516  
0.953  
0.634  
0.655  
0.542  
0.563  
1.72  
0.585  
1.08  
1.32  
0.714  
1.36  
2.06  
0.599  
1.15  
1.01  
0.775  
1.34  
1.86  
0.722  
1.01  
0.667  
0.565  
2.29  
1.32  
1.94  
0.981  
0.337  
4.25  
0.527  
0.976  
1  
0.401  
0.795  
1.61  
1.56  
1.02  
1.29  
0.619  
0.543  
0.414  
0.289  
0.624

1.58  
1.24  
2.14  
1.07  
0.363  
0.578  
1.84  
0.403  
1.56  
1.69  
0.823  
1.5  
4.11  
1.91  
0.0536  
1.43  
0.299  
0.426  
1.22  
0.498  
1.11  
0.629  
1.13  
1  
0.826  
2.54  
1.32  
0.274  
0.369  
0.582  
0.528  
1.32  
0.972  
0.696  
1.07  
1.9  
1.34  
0.669  
1.27  
0.932  
1.19  
0.126  
2.07  
2.39  
0.625  
0.561  
0.063  
1.93  
0.698  
0.391  
0.647

0.98  
2.21  
1.09  
0.141  
3.22  
2.07  
1.15  
1.38  
0.0647  
1.07  
2.54  
0.403  
0.306  
1.54  
0.507  
0.673  
0.608  
0.933  
1.58  
0.34  
1.5  
1.23  
2.13  
2.4  
0.57  
3.29  
1.35  
0.783  
0.887  
1.22  
0.425  
1.81  
0.377  
1.03  
1.65  
0.932  
1.46  
1.13  
1.38  
1.25  
0.705  
4  
1.86  
0.66  
1.17  
1.73  
0.633  
1.09  
2.95  
2.95  
0.291

0.239  
0.338  
0.953  
0.343  
1.7  
1.13  
0.294  
1.58  
1.54  
1.51  
0.0466  
0.108  
1.38  
1.04  
0.627  
1.4  
1.38  
0.703  
0.571  
1.02  
0.611  
1.62  
1.1  
0.758  
0.485  
0.495  
0.705  
1.79  
2.17  
1.97  
0.624  
0.546  
0.972  
1.68  
0.284  
0.27  
1  
1.02  
0.632  
0.392  
0.407  
1.89  
0.762  
2.27  
0.139  
1.43  
1.05  
0.95  
0.46  
1.11  
2.01

0.952  
2.67  
1.39  
0.872  
0.274  
1.31  
1.11  
1.69  
1.54  
0.236  
1.47  
1.87  
1.13  
1.11  
1.59  
0.833  
0.0232  
0.818  
1.09  
0.895  
0.563  
0.887  
2.3  
0.295  
1.26  
0.231  
0.348  
1.73  
1.85  
0.69  
0.891  
1.07  
1.09  
1.03  
0.598  
0.652  
0.807  
0.662  
0.186  
0.586  
0.759  
1.68  
0.833  
0.229  
1  
1.32  
1.53  
1.11  
0.343  
1.26  
1.13



1.06  
0.998  
0.868  
2.34  
2.44  
0.679  
2  
0.565  
0.123  
0.492  
0.872  
1.4  
1.17  
0.589  
1.95  
1.74  
0.955  
0.494  
0.458  
0.38  
0.593  
3.38  
1.98  
0.352  
0.611  
0.468  
0.737  
1.26  
1.47  
0.942  
0.728  
1.44  
1.49  
0.341  
1.7  
0.161  
1.03  
1.1  
0.785  
0.876  
0.417  
1.95  
0.695  
3.09  
0.921  
1.13  
0.594  
0.794  
2.87  
1.37  
0.443

0.774  
2  
0.347  
1.14  
0.261  
0.519  
0.81  
0.53  
0.253  
3.06  
0.805  
0.577  
1.61  
0.491  
1.35  
0.635  
0.973  
3.63  
1.39  
0.641  
0.149  
0.759  
0.281  
0.343  
1.54  
0.5  
1.29  
0.595  
0.682  
0.993  
1.19  
1.49  
1.28  
0.692  
0.544  
0.737  
1.28  
0.672  
0.33  
1.23  
0.866  
1.79  
2.12  
1.09  
1.64  
0.465  
0.585  
0.56  
0.236  
0.801  
1.91

0.396  
1.5  
0.4  
0.487  
0.227  
0.661  
0.553  
1.29  
0.041  
1.27  
2.19  
1.97  
2.64  
1.13  
2.21  
0.624  
0.892  
1.88  
0.694  
0.776  
0.725  
0.506  
0.706  
0.492  
0.632  
0.644  
0.708  
0.986  
2.87  
2.24  
0.323  
0.821  
0.946  
1.69  
1.23  
0.484  
0.772  
0.669  
0.756  
1.16  
1.48  
0.604  
0.625  
0.921  
0.8  
1.17  
0.495  
0.788  
0.533  
1.22  
1.62

1.39  
1.05  
2.42  
2.57  
0.51  
0.234  
1.61  
1  
0.618  
1.01  
0.508  
0.807  
2.3  
2.62  
0.587  
2.46  
0.746  
0.805  
0.409  
0.793  
1.81  
2.62  
0.451  
1.84  
0.49  
1.47  
2.03  
0.581  
1.23  
1.16  
2.26  
1.05  
1.2  
0.562  
0.602  
0.875  
1.46  
1.1  
0.852  
0.79  
0.0748  
0.846  
0.912  
2.74  
0.861  
0.792  
0.409  
0.276  
0.872  
0.383  
1.29

0.941  
0.876  
1.35  
0.248  
0.861  
0.0893  
0.385  
0.472  
1.64  
1.23  
0.537  
0.275  
1.26  
0.401  
0.00556  
0.502  
0.581  
1.94  
3.52  
1.1  
0.142  
1.53  
2.14  
1.3  
0.797  
0.115  
1.87  
2.71  
1.15  
0.356  
0.144  
0.772  
0.654  
1.94  
2.06  
0.945  
1.07  
0.478  
0.664  
1.1  
0.909  
0.564  
1.4  
1.18  
0.166  
0.638  
1.09  
0.599  
0.226  
0.327  
0.538

0.248  
0.751  
0.552  
1.78  
0.526  
0.861  
1.43  
0.848  
1.76  
0.575  
0.268  
1.07  
0.325  
1.32  
1.04  
0.91  
0.397  
1.7  
0.643  
0.798  
0.37  
0.069  
0.881  
0.362  
0.298  
1.42  
0.91  
0.498  
0.844  
0.599  
0.361  
0.844  
0.571  
1.22  
0.538  
0.35  
2.53  
0.715  
0.0589  
0.134  
2  
2.83  
1.23  
1.08  
0.883  
0.963  
1.58  
0.673  
1.09  
0.166  
2.34

1.49  
0.714  
0.884  
0.455  
0.391  
0.78  
0.585  
0.0294  
0.556  
0.138  
2.77  
0.504  
1.62  
0.349  
0.836  
0.59  
0.889  
0.565  
1.81  
0.625  
0.0794  
0.922  
0.716  
0.559  
0.641  
0.337  
0.867  
1.61  
0.601  
0.733  
0.337  
1.26  
2.69  
0.0889  
1.35  
0.359  
0.83  
0.0612  
0.847  
0.491  
0.915  
0.618  
0.85  
0.631  
0.666  
0.603  
0.551  
0.671  
0.534  
0.37  
0.541

0.553  
1.37  
0.317  
0.0653  
0.441  
0.715  
0.708  
0.53  
1.56  
0.485  
1.63  
1.47  
0.485  
0.426  
0.997  
0.498  
0.425  
0.831  
0.933  
0.71  
2.29  
0.306  
0.954  
0.771  
0.485  
2.54  
1  
0.894
